# Supplementary material for: Digital transformation in the Shared Socioeconomic Pathways
Source: NPJ Clim Action. 2025 Aug 22;4(1):79. doi: 10.1038/s44168-025-00283-w (PMC12370532; doi:10.1038/s44168-025-00283-w)
Supplement: Supplementary file 2 — Supplementary Excel_Clean [file 44168_2025_283_MOESM2_ESM.xlsx]

## Sheet: 1|62 Countries
Country	Year	Region	Scenario	GDP per capita, PPP (2017)	Population	R&D expenditure (% of GDP)	Digital Transformation (Based on Model 1)	Digital Transformation*Pop
Argentina	2003	Latin America and the Caribbean	Historical	16600	38278164	0.41013	0.57704	2.2088e+07
Argentina	2004	Latin America and the Caribbean	Historical	18000	38668796	0.40376	0.58712	2.27032e+07
Argentina	2005	Latin America and the Caribbean	Historical	19300	39070501	0.42074	0.59713	2.33302e+07
Argentina	2008	Latin America and the Caribbean	Historical	22992.4	40273769	0.47055	0.5844	2.3536e+07
Argentina	2010	Latin America and the Caribbean	Historical	23521.3	40788453	0.56104	0.54668	2.22982e+07
Argentina	2012	Latin America and the Caribbean	Historical	24118.9	41733271	0.63491	0.62279	2.59911e+07
Argentina	2014	Latin America and the Caribbean	Historical	23550.1	42669500	0.59396	0.63059	2.6907e+07
Argentina	2016	Latin America and the Caribbean	Historical	23189.5	43590368	0.55815	0.6978	3.04174e+07
Argentina	2018	Latin America and the Caribbean	Historical	22747.2	44494502	0.49435	0.7335	3.26367e+07
Argentina	2020	Latin America and the Caribbean	Historical	19694.6	45376763	0.54154	0.8279	3.75674e+07
Argentina	2020	Latin America and the Caribbean	SSP1	16713.6	44908441	0.483085	0.8279	1.07205e+07
Argentina	2020	Latin America and the Caribbean	SSP2	16713.6	44908441	0.483085	0.8279	1.07205e+07
Argentina	2020	Latin America and the Caribbean	SSP3	16713.6	44908441	0.483085	0.8279	1.07205e+07
Argentina	2020	Latin America and the Caribbean	SSP4	16713.6	44908441	0.483085	0.8279	1.07205e+07
Argentina	2020	Latin America and the Caribbean	SSP5	16713.6	44908441	0.483085	0.8279	1.07205e+07
Argentina	2025	Latin America and the Caribbean	SSP1	18775	45898345	0.542667	0.85367	1.21396e+07
Argentina	2025	Latin America and the Caribbean	SSP2	18714.7	46046193	0.540924	0.853059	1.21505e+07
Argentina	2025	Latin America and the Caribbean	SSP3	18667.6	46162381	0.539563	0.852582	1.21592e+07
Argentina	2025	Latin America and the Caribbean	SSP4	18665.3	46167997	0.539497	0.852559	1.21596e+07
Argentina	2025	Latin America and the Caribbean	SSP5	18784.7	45874512	0.542948	0.853768	1.21378e+07
Argentina	2030	Latin America and the Caribbean	SSP1	20870.4	46799912	0.603232	0.879781	1.36e+07
Argentina	2030	Latin America and the Caribbean	SSP2	20653.2	47225774	0.596954	0.877494	1.36158e+07
Argentina	2030	Latin America and the Caribbean	SSP3	20474.9	47578029	0.591801	0.875618	1.36281e+07
Argentina	2030	Latin America and the Caribbean	SSP4	20497.7	47612005	0.59246	0.875922	1.36523e+07
Argentina	2030	Latin America and the Caribbean	SSP5	20931.6	46755413	0.605001	0.880486	1.36201e+07
Argentina	2035	Latin America and the Caribbean	SSP1	23146.1	47530373	0.669008	0.907938	1.51506e+07
Argentina	2035	Latin America and the Caribbean	SSP2	22465.1	48320109	0.649325	0.900326	1.50345e+07
Argentina	2035	Latin America and the Caribbean	SSP3	21818	49041629	0.630621	0.89307	1.49032e+07
Argentina	2035	Latin America and the Caribbean	SSP4	22214.1	49110833	0.64207	0.897924	1.51626e+07
Argentina	2035	Latin America and the Caribbean	SSP5	23661	47468989	0.683891	0.914125	1.54247e+07
Argentina	2040	Latin America and the Caribbean	SSP1	26026	48060967	0.752248	0.943252	1.7017e+07
Argentina	2040	Latin America and the Caribbean	SSP2	24541.6	49298657	0.709343	0.92627	1.6618e+07
Argentina	2040	Latin America and the Caribbean	SSP3	23030.9	50519494	0.665679	0.908955	1.61548e+07
Argentina	2040	Latin America and the Caribbean	SSP4	24287.3	50618582	0.701993	0.924255	1.69609e+07
Argentina	2040	Latin America and the Caribbean	SSP5	27557.3	47987106	0.796508	0.961742	1.78781e+07
Argentina	2045	Latin America and the Caribbean	SSP1	29507.3	48443481	0.852871	0.985732	1.92103e+07
Argentina	2045	Latin America and the Caribbean	SSP2	27006.3	50120031	0.780582	0.956789	1.84245e+07
Argentina	2045	Latin America and the Caribbean	SSP3	24257.5	51851961	0.701132	0.92489	1.74071e+07
Argentina	2045	Latin America and the Caribbean	SSP4	26915.6	51964644	0.777961	0.95718	1.91229e+07
Argentina	2045	Latin America and the Caribbean	SSP5	32522.1	48362249	0.94001	1.02219	2.09411e+07
Argentina	2050	Latin America and the Caribbean	SSP1	33424	48632883	0.966078	1.03333	2.16002e+07
Argentina	2050	Latin America and the Caribbean	SSP2	29925.9	50764316	0.86497	0.992676	2.04831e+07
Argentina	2050	Latin America and the Caribbean	SSP3	25619.6	53060457	0.740502	0.942365	1.87401e+07
Argentina	2050	Latin America and the Caribbean	SSP4	30078.4	53188757	0.869378	0.996481	2.16637e+07
Argentina	2050	Latin America and the Caribbean	SSP5	38171	48549839	1.10328	1.09077	2.43518e+07
Argentina	2055	Latin America and the Caribbean	SSP1	37762	48609732	1.09146	1.08586	2.41434e+07
Argentina	2055	Latin America and the Caribbean	SSP2	33309.3	51224476	0.962763	1.03403	2.27873e+07
Argentina	2055	Latin America and the Caribbean	SSP3	27104.6	54162913	0.783424	0.961244	2.0152e+07
Argentina	2055	Latin America and the Caribbean	SSP4	33758.7	54308621	0.975752	1.04197	2.45901e+07
Argentina	2055	Latin America and the Caribbean	SSP5	44570.3	48531030	1.28825	1.16827	2.81037e+07
Argentina	2060	Latin America and the Caribbean	SSP1	42551.7	48329408	1.2299	1.14365	2.67973e+07
Argentina	2060	Latin America and the Caribbean	SSP2	37127.7	51456343	1.07313	1.08047	2.52801e+07
Argentina	2060	Latin America and the Caribbean	SSP3	28609.3	55138132	0.826915	0.980259	2.15632e+07
Argentina	2060	Latin America and the Caribbean	SSP4	37860.9	55302319	1.09432	1.09246	2.78325e+07
Argentina	2060	Latin America and the Caribbean	SSP5	51881.4	48261163	1.49957	1.25662	3.22111e+07
Argentina	2065	Latin America and the Caribbean	SSP1	47815	47839657	1.38203	1.20702	2.9557e+07
Argentina	2065	Latin America and the Caribbean	SSP2	41398.7	51493465	1.19658	1.13224	2.7964e+07
Argentina	2065	Latin America and the Caribbean	SSP3	30124.2	56008093	0.870701	0.999312	2.29706e+07
Argentina	2065	Latin America and the Caribbean	SSP4	42402.5	56187736	1.22559	1.14819	3.14095e+07
Argentina	2065	Latin America and the Caribbean	SSP5	60233.2	47787786	1.74096	1.3574	3.67116e+07
Argentina	2070	Latin America and the Caribbean	SSP1	53469.5	47167588	1.54547	1.27497	32346982
Argentina	2070	Latin America and the Caribbean	SSP2	46075.6	51364513	1.33176	1.18879	3.07987e+07
Argentina	2070	Latin America and the Caribbean	SSP3	31612.2	56819949	0.91371	1.01799	2.4365e+07
Argentina	2070	Latin America and the Caribbean	SSP4	47345.1	57006884	1.36845	1.20873	3.53182e+07
Argentina	2070	Latin America and the Caribbean	SSP5	69594.3	47136851	2.01153	1.47027	4.15319e+07
Argentina	2075	Latin America and the Caribbean	SSP1	59383.6	46330638	1.71641	1.34594	3.50609e+07
Argentina	2075	Latin America and the Caribbean	SSP2	51096.2	51083100	1.47687	1.24938	3.37251e+07
Argentina	2075	Latin America and the Caribbean	SSP3	33043.6	57593925	0.955083	1.03596	2.57315e+07
Argentina	2075	Latin America and the Caribbean	SSP4	52652.3	57776052	1.52185	1.27364	3.9545e+07
Argentina	2075	Latin America and the Caribbean	SSP5	79859.4	46325249	2.30823	1.59397	4.65469e+07
Argentina	2080	Latin America and the Caribbean	SSP1	65503.9	45336616	1.89331	1.41927	3.76335e+07
Argentina	2080	Latin America and the Caribbean	SSP2	56466.8	50655860	1.6321	1.31409	3.67211e+07
Argentina	2080	Latin America and the Caribbean	SSP3	34439.5	58316551	0.99543	1.05345	2.70745e+07
Argentina	2080	Latin America and the Caribbean	SSP4	58353.6	58482001	1.68664	1.34327	4.41005e+07
Argentina	2080	Latin America and the Caribbean	SSP5	91014.4	45360084	2.63065	1.72831	5.16712e+07
Argentina	2085	Latin America and the Caribbean	SSP1	71828.7	44198720	2.07612	1.49497	4.00346e+07
Argentina	2085	Latin America and the Caribbean	SSP2	62230.7	50092879	1.7987	1.38346	3.97878e+07
Argentina	2085	Latin America and the Caribbean	SSP3	35837.7	58998831	1.03584	1.07094	2.8423e+07
Argentina	2085	Latin America and the Caribbean	SSP4	64504.1	59138985	1.86441	1.4183	4.90334e+07
Argentina	2085	Latin America and the Caribbean	SSP5	103113	44253573	2.98035	1.87398	5.68569e+07
Argentina	2090	Latin America and the Caribbean	SSP1	78363.7	42918195	2.265	1.5731	4.22279e+07
Argentina	2090	Latin America and the Caribbean	SSP2	68421.5	49413354	1.97764	1.45791	4.29266e+07
Argentina	2090	Latin America and the Caribbean	SSP3	37257.1	59668798	1.07687	1.08867	2.9804e+07
Argentina	2090	Latin America and the Caribbean	SSP4	71129.7	59777576	2.05591	1.49908	5.43915e+07
Argentina	2090	Latin America and the Caribbean	SSP5	116226	43006348	3.35936	2.03182	6.20425e+07
Argentina	2095	Latin America and the Caribbean	SSP1	85093	41481235	2.4595	1.65345	4.41473e+07
Argentina	2095	Latin America and the Caribbean	SSP2	75035.4	48637900	2.1688	1.5374	4.61192e+07
Argentina	2095	Latin America and the Caribbean	SSP3	38690.9	60361979	1.11831	1.1066	3.12324e+07
Argentina	2095	Latin America and the Caribbean	SSP4	78211.3	60432704	2.2606	1.58539	6.02037e+07
Argentina	2095	Latin America and the Caribbean	SSP5	130393	41605022	3.76884	2.2023	6.71138e+07
Argentina	2100	Latin America and the Caribbean	SSP1	91977.3	39871433	2.65849	1.73555	4.57072e+07
Argentina	2100	Latin America and the Caribbean	SSP2	82032.4	47798229	2.37104	1.62148	4.9342e+07
Argentina	2100	Latin America and the Caribbean	SSP3	40123.2	61125970	1.15971	1.12457	3.2726e+07
Argentina	2100	Latin America and the Caribbean	SSP4	85707.3	61148068	2.47726	1.67677	6.65041e+07
Argentina	2100	Latin America and the Caribbean	SSP5	145623	40033232	4.20905	2.38552	7.19132e+07
Armenia	2003	Former Soviet Union	Historical	5698.78	3084102	0.32109	0.37673	1.16187e+06
Armenia	2004	Former Soviet Union	Historical	6334.86	3065745	0.25659	0.39188	1.2014e+06
Armenia	2005	Former Soviet Union	Historical	7259.2	3047246	0.25761	0.36248	1.10457e+06
Armenia	2008	Former Soviet Union	Historical	10201.6	2983421	0.22438	0.4182	1.24767e+06
Armenia	2010	Former Soviet Union	Historical	9068.79	2946293	0.24139	0.40247	1.18579e+06
Armenia	2012	Former Soviet Union	Historical	10290	2914421	0.23853	0.49967	1.45625e+06
Armenia	2014	Former Soviet Union	Historical	11105.5	2889930	0.24151	0.58969	1.70416e+06
Armenia	2016	Former Soviet Union	Historical	11580.4	2865835	0.23305	0.51785	1.48407e+06
Armenia	2018	Former Soviet Union	Historical	13231.4	2836557	0.18876	0.5944	1.68605e+06
Armenia	2020	Former Soviet Union	Historical	13357.7	2805608	0.2092	0.7136	2.00208e+06
Armenia	2020	Former Soviet Union	SSP1	13339.2	2812494	0.385552	0.7136	460845
Armenia	2020	Former Soviet Union	SSP2	13339.2	2812494	0.385552	0.7136	460845
Armenia	2020	Former Soviet Union	SSP3	13339.2	2812494	0.385552	0.7136	460845
Armenia	2020	Former Soviet Union	SSP4	13339.2	2812494	0.385552	0.7136	460845
Armenia	2020	Former Soviet Union	SSP5	13339.2	2812494	0.385552	0.7136	460845
Armenia	2025	Former Soviet Union	SSP1	18979.5	2762665	0.548578	0.781884	641326
Armenia	2025	Former Soviet Union	SSP2	18984.1	2761986	0.548711	0.781939	641321
Armenia	2025	Former Soviet Union	SSP3	18706.9	2802906	0.540699	0.778614	641503
Armenia	2025	Former Soviet Union	SSP4	19032.9	2754908	0.550122	0.782525	641290
Armenia	2025	Former Soviet Union	SSP5	19491.6	2690074	0.56338	0.788029	641005
Armenia	2030	Former Soviet Union	SSP1	24123.6	2720682	0.697262	0.844164	801023
Armenia	2030	Former Soviet Union	SSP2	24086.7	2718854	0.696195	0.843715	799266
Armenia	2030	Former Soviet Union	SSP3	23312.6	2802143	0.673821	0.834405	797663
Armenia	2030	Former Soviet Union	SSP4	24269.6	2700510	0.701482	0.845916	799816
Armenia	2030	Former Soviet Union	SSP5	25478	2585283	0.736409	0.860461	803292
Armenia	2035	Former Soviet Union	SSP1	30184.3	2668677	0.872438	0.917539	981526
Armenia	2035	Former Soviet Union	SSP2	29565.3	2665520	0.854547	0.910038	960371
Armenia	2035	Former Soviet Union	SSP3	27588.3	2790084	0.797404	0.88619	938713
Armenia	2035	Former Soviet Union	SSP4	30147.9	2630958	0.871386	0.917067	966413
Armenia	2035	Former Soviet Union	SSP5	33425.7	2482884	0.966127	0.956654	1.01031e+06
Armenia	2040	Former Soviet Union	SSP1	36336.4	2614882	1.05026	0.992019	1.1565e+06
Armenia	2040	Former Soviet Union	SSP2	34700.6	2611725	1.00298	0.972201	1.10334e+06
Armenia	2040	Former Soviet Union	SSP3	30917.2	2778197	0.893622	0.926505	1.04672e+06
Armenia	2040	Former Soviet Union	SSP4	35865.1	2554327	1.03663	0.986261	1.11501e+06
Armenia	2040	Former Soviet Union	SSP5	42180.6	2390050	1.21918	1.06263	1.22583e+06
Armenia	2045	Former Soviet Union	SSP1	41959.2	2563396	1.21278	1.06009	1.30822e+06
Armenia	2045	Former Soviet Union	SSP2	39286.4	2561087	1.13552	1.02771	1.22412e+06
Armenia	2045	Former Soviet Union	SSP3	33396.1	2768142	0.965271	0.956525	1.12603e+06
Armenia	2045	Former Soviet Union	SSP4	41017.2	2478658	1.18555	1.04861	1.23652e+06
Armenia	2045	Former Soviet Union	SSP5	50376.9	2308470	1.45608	1.16185	1.41304e+06
Armenia	2050	Former Soviet Union	SSP1	46896.7	2510375	1.35549	1.11986	1.4312e+06
Armenia	2050	Former Soviet Union	SSP2	43483.2	2511292	1.25683	1.07851	1.32788e+06
Armenia	2050	Former Soviet Union	SSP3	35434.8	2759493	1.0242	0.981214	1.19064e+06
Armenia	2050	Former Soviet Union	SSP4	45595.5	2402778	1.31788	1.10401	1.33178e+06
Armenia	2050	Former Soviet Union	SSP5	57591.6	2233219	1.66461	1.24919	1.56201e+06
Armenia	2055	Former Soviet Union	SSP1	51587.1	2453386	1.49106	1.17663	1.53799e+06
Armenia	2055	Former Soviet Union	SSP2	47637	2461032	1.37689	1.12879	1.42504e+06
Armenia	2055	Former Soviet Union	SSP3	37361.7	2751458	1.07989	1.00455	1.25138e+06
Armenia	2055	Former Soviet Union	SSP4	49931.2	2326310	1.4432	1.15647	1.41143e+06
Armenia	2055	Former Soviet Union	SSP5	64633.5	2161439	1.86815	1.33443	1.69606e+06
Armenia	2060	Former Soviet Union	SSP1	56563.7	2391641	1.6349	1.23686	1.64335e+06
Armenia	2060	Former Soviet Union	SSP2	52100.4	2410300	1.5059	1.18281	1.52589e+06
Armenia	2060	Former Soviet Union	SSP3	39365.5	2743427	1.13781	1.02882	1.3143e+06
Armenia	2060	Former Soviet Union	SSP4	54467.2	2249731	1.5743	1.21135	1.48844e+06
Armenia	2060	Former Soviet Union	SSP5	72329.5	2091881	2.09059	1.4276	1.83638e+06
Armenia	2065	Former Soviet Union	SSP1	61989.7	2333004	1.79173	1.30255	1.75629e+06
Armenia	2065	Former Soviet Union	SSP2	56946	2364189	1.64595	1.24147	1.63538e+06
Armenia	2065	Former Soviet Union	SSP3	41436.7	2737240	1.19767	1.0539	1.38e+06
Armenia	2065	Former Soviet Union	SSP4	59330.2	2177749	1.71486	1.2702	1.56898e+06
Armenia	2065	Former Soviet Union	SSP5	80936.3	2032261	2.33936	1.53181	1.99582e+06
Armenia	2070	Former Soviet Union	SSP1	67421.9	2278013	1.94874	1.3683	1.86469e+06
Armenia	2070	Former Soviet Union	SSP2	61735.9	2321901	1.7844	1.29946	1.74077e+06
Armenia	2070	Former Soviet Union	SSP3	43215.9	2734336	1.2491	1.07545	1.43746e+06
Armenia	2070	Former Soviet Union	SSP4	64109.1	2108340	1.85299	1.32804	1.64091e+06
Armenia	2070	Former Soviet Union	SSP5	89977.1	1981030	2.60067	1.64129	2.16238e+06
Armenia	2075	Former Soviet Union	SSP1	72309.8	2224726	2.09002	1.42747	1.9527e+06
Armenia	2075	Former Soviet Union	SSP2	66012.4	2281937	1.908	1.35123	1.82895e+06
Armenia	2075	Former Soviet Union	SSP3	44412.6	2737142	1.28369	1.08995	1.47862e+06
Armenia	2075	Former Soviet Union	SSP4	68313	2039524	1.9745	1.37891	1.6911e+06
Armenia	2075	Former Soviet Union	SSP5	98873.9	1935009	2.85782	1.74902	2.32062e+06
Armenia	2080	Former Soviet Union	SSP1	77108.9	2170389	2.22873	1.48556	2.03109e+06
Armenia	2080	Former Soviet Union	SSP2	70161.2	2243057	2.02792	1.40146	1.91045e+06
Armenia	2080	Former Soviet Union	SSP3	45291.1	2748568	1.30908	1.1006	1.51407e+06
Armenia	2080	Former Soviet Union	SSP4	72372	1970379	2.09182	1.42802	1.73054e+06
Armenia	2080	Former Soviet Union	SSP5	108220	1890834	3.12796	1.8622	2.48164e+06
Armenia	2085	Former Soviet Union	SSP1	82024.4	2113985	2.37081	1.54506	2.10409e+06
Armenia	2085	Former Soviet Union	SSP2	74376.8	2206341	2.14977	1.4525	1.99178e+06
Armenia	2085	Former Soviet Union	SSP3	46003.2	2771376	1.32966	1.10925	1.55059e+06
Armenia	2085	Former Soviet Union	SSP4	76458.9	1902405	2.20995	1.47747	1.76491e+06
Armenia	2085	Former Soviet Union	SSP5	118313	1846959	3.41969	1.98443	2.64981e+06
Armenia	2090	Former Soviet Union	SSP1	87186.6	2057776	2.52002	1.60755	2.17672e+06
Armenia	2090	Former Soviet Union	SSP2	78793.2	2175424	2.27742	1.50597	2.0802e+06
Armenia	2090	Former Soviet Union	SSP3	46655.5	2806343	1.34852	1.11718	1.59241e+06
Armenia	2090	Former Soviet Union	SSP4	80684.9	1839247	2.33209	1.52861	1.80038e+06
Armenia	2090	Former Soviet Union	SSP5	129372	1804284	3.73933	2.11836	2.83023e+06
Armenia	2095	Former Soviet Union	SSP1	92590	2006171	2.6762	1.67296	2.25337e+06
Armenia	2095	Former Soviet Union	SSP2	83440.6	2152321	2.41174	1.56225	2.17923e+06
Armenia	2095	Former Soviet Union	SSP3	47260.2	2851363	1.366	1.12454	1.63894e+06
Armenia	2095	Former Soviet Union	SSP4	85077	1782397	2.45904	1.58177	1.83948e+06
Armenia	2095	Former Soviet Union	SSP5	141465	1765290	4.08886	2.26482	3.0276e+06
Armenia	2100	Former Soviet Union	SSP1	98178.5	1961900	2.83772	1.74062	2.33638e+06
Armenia	2100	Former Soviet Union	SSP2	88327.5	2135211	2.55299	1.62143	2.28828e+06
Armenia	2100	Former Soviet Union	SSP3	47799.7	2903229	1.38159	1.13111	1.68785e+06
Armenia	2100	Former Soviet Union	SSP4	89675.6	1729114	2.59196	1.63743	1.88074e+06
Armenia	2100	Former Soviet Union	SSP5	154594	1731133	4.46834	2.42383	3.24429e+06
Australia	2003	Pacific OECD	Historical	40500	19720737	1.68348	0.83106	1.63891e+07
Australia	2004	Pacific OECD	Historical	41800	19932722	1.84902	0.83766	1.66968e+07
Australia	2005	Pacific OECD	Historical	42600	20176844	2.01456	0.86786	1.75107e+07
Australia	2008	Pacific OECD	Historical	44675.1	21249199	2.39995	0.8108	1.72289e+07
Australia	2010	Pacific OECD	Historical	44881.3	22031750	2.37075	0.78627	1.73229e+07
Australia	2012	Pacific OECD	Historical	46289.2	22733465	2.23484	0.839	1.90734e+07
Australia	2014	Pacific OECD	Historical	47193.2	23475686	2.17843	0.91034	2.13709e+07
Australia	2016	Pacific OECD	Historical	48107.1	24190907	1.92071	0.91428	2.21173e+07
Australia	2018	Pacific OECD	Historical	49085.9	24963258	1.87977	0.9053	2.25992e+07
Australia	2020	Pacific OECD	Historical	48651.7	25649248	1.82892	0.9432	2.41924e+07
Australia	2020	Pacific OECD	SSP1	47086.7	25544183	1.36098	0.9432	1.50969e+07
Australia	2020	Pacific OECD	SSP2	47086.7	25544183	1.36098	0.9432	1.50969e+07
Australia	2020	Pacific OECD	SSP3	47086.7	25544183	1.36098	0.9432	1.50969e+07
Australia	2020	Pacific OECD	SSP4	47086.7	25544183	1.36098	0.9432	1.50969e+07
Australia	2020	Pacific OECD	SSP5	47086.7	25544183	1.36098	0.9432	1.50969e+07
Australia	2025	Pacific OECD	SSP1	52071.7	26566755	1.50507	1.00441	1.73275e+07
Australia	2025	Pacific OECD	SSP2	52072.5	26566333	1.50509	1.00442	1.73274e+07
Australia	2025	Pacific OECD	SSP3	52410.9	26394827	1.51487	1.00838	1.73201e+07
Australia	2025	Pacific OECD	SSP4	52212.1	26495297	1.50912	1.00605	1.73244e+07
Australia	2025	Pacific OECD	SSP5	51255.3	26989883	1.48147	0.994864	1.73458e+07
Australia	2030	Pacific OECD	SSP1	57348.8	27552044	1.65759	1.06913	1.97533e+07
Australia	2030	Pacific OECD	SSP2	57195.8	27552490	1.65317	1.06728	1.97025e+07
Australia	2030	Pacific OECD	SSP3	57683	27220556	1.66725	1.07291	1.96185e+07
Australia	2030	Pacific OECD	SSP4	57788.7	27340202	1.67031	1.07429	1.97424e+07
Australia	2030	Pacific OECD	SSP5	55732.8	28444274	1.61089	1.05028	1.98566e+07
Australia	2035	Pacific OECD	SSP1	63991.3	28468774	1.84959	1.15034	2.27223e+07
Australia	2035	Pacific OECD	SSP2	62633.7	28470408	1.81035	1.13389	2.22555e+07
Australia	2035	Pacific OECD	SSP3	61935	27983829	1.79015	1.12504	2.16272e+07
Australia	2035	Pacific OECD	SSP4	64745.8	28046542	1.87139	1.15914	2.26321e+07
Australia	2035	Pacific OECD	SSP5	62706.2	29875025	1.81244	1.1359	2.34136e+07
Australia	2040	Pacific OECD	SSP1	71960.7	29326610	2.07993	1.24757	2.62584e+07
Australia	2040	Pacific OECD	SSP2	68390.2	29338964	1.97673	1.20433	2.50008e+07
Australia	2040	Pacific OECD	SSP3	65161.1	28711024	1.8834	1.1647	2.33281e+07
Australia	2040	Pacific OECD	SSP4	72837.9	28624450	2.10529	1.25763	2.59177e+07
Australia	2040	Pacific OECD	SSP5	72401.5	31281870	2.09267	1.25449	2.82256e+07
Australia	2045	Pacific OECD	SSP1	80733.1	30175044	2.33349	1.35452	3.02453e+07
Australia	2045	Pacific OECD	SSP2	74440.5	30196575	2.15161	1.27831	2.79657e+07
Australia	2045	Pacific OECD	SSP3	67583.2	29410264	1.95341	1.19461	2.47758e+07
Australia	2045	Pacific OECD	SSP4	81375.4	29156752	2.35205	1.36148	2.94276e+07
Australia	2045	Pacific OECD	SSP5	83936.9	32702923	2.42609	1.39537	3.4115e+07
Australia	2050	Pacific OECD	SSP1	89121.9	31024163	2.57595	1.45682	3.42703e+07
Australia	2050	Pacific OECD	SSP2	80421.7	31068778	2.32449	1.35147	3.10464e+07
Australia	2050	Pacific OECD	SSP3	69416.9	30134668	2.00641	1.21741	2.6073e+07
Australia	2050	Pacific OECD	SSP4	89200.2	29659556	2.57822	1.45667	3.27584e+07
Australia	2050	Pacific OECD	SSP5	95531.2	34135668	2.76121	1.53697	4.04434e+07
Australia	2055	Pacific OECD	SSP1	97108	31789861	2.80678	1.55418	3.82112e+07
Australia	2055	Pacific OECD	SSP2	86359.9	31882165	2.49612	1.42406	3.41735e+07
Australia	2055	Pacific OECD	SSP3	70883.7	30830770	2.0488	1.23574	2.72404e+07
Australia	2055	Pacific OECD	SSP4	96296.5	30075094	2.78333	1.54297	3.58128e+07
Australia	2055	Pacific OECD	SSP5	107364	35475941	3.10322	1.68139	4.71548e+07
Australia	2060	Pacific OECD	SSP1	105141	32459956	3.03897	1.65203	4.21928e+07
Australia	2060	Pacific OECD	SSP2	92470	32636666	2.67273	1.49868	3.74177e+07
Australia	2060	Pacific OECD	SSP3	72094.8	31525837	2.08381	1.25097	2.83348e+07
Australia	2060	Pacific OECD	SSP4	103180	30398930	2.98229	1.62661	3.87411e+07
Australia	2060	Pacific OECD	SSP5	120083	36703475	3.47085	1.83646	5.44778e+07
Australia	2065	Pacific OECD	SSP1	113419	33002870	3.27823	1.75274	4.62224e+07
Australia	2065	Pacific OECD	SSP2	98878.3	33290315	2.85795	1.57684	4.07689e+07
Australia	2065	Pacific OECD	SSP3	73187.5	32198534	2.11539	1.26475	2.93831e+07
Australia	2065	Pacific OECD	SSP4	110071	30594239	3.18146	1.71024	4.15487e+07
Australia	2065	Pacific OECD	SSP5	134006	37747726	3.87327	2.00596	6.24261e+07
Australia	2070	Pacific OECD	SSP1	121704	33432817	3.5177	1.85345	5.01915e+07
Australia	2070	Pacific OECD	SSP2	105357	33854980	3.04521	1.65577	4.41328e+07
Australia	2070	Pacific OECD	SSP3	74032.8	32861805	2.13982	1.27552	3.03424e+07
Australia	2070	Pacific OECD	SSP4	116792	30666444	3.37572	1.79172	4.41452e+07
Australia	2070	Pacific OECD	SSP5	148879	38627685	4.30316	2.18683	7.08681e+07
Australia	2075	Pacific OECD	SSP1	129840	33739290	3.75286	1.95226	5.39852e+07
Australia	2075	Pacific OECD	SSP2	111796	34329253	3.23132	1.73415	4.74419e+07
Australia	2075	Pacific OECD	SSP3	74647.9	33508019	2.1576	1.28349	3.12063e+07
Australia	2075	Pacific OECD	SSP4	123228	30612001	3.56175	1.86964	4.64521e+07
Australia	2075	Pacific OECD	SSP5	164534	39334539	4.75564	2.37704	7.96467e+07
Australia	2080	Pacific OECD	SSP1	137797	33894564	3.98285	2.04877	5.75049e+07
Australia	2080	Pacific OECD	SSP2	118176	34697285	3.41573	1.81174	5.06424e+07
Australia	2080	Pacific OECD	SSP3	75066.9	34123586	2.16971	1.28907	3.19697e+07
Australia	2080	Pacific OECD	SSP4	129381	30416265	3.73959	1.94401	4.84174e+07
Australia	2080	Pacific OECD	SSP5	180956	39838406	5.2303	2.57638	8.86082e+07
Australia	2085	Pacific OECD	SSP1	145708	33791432	4.2115	2.14452	6.05654e+07
Australia	2085	Pacific OECD	SSP2	124559	34930598	3.60022	1.88925	5.36904e+07
Australia	2085	Pacific OECD	SSP3	75356.3	34712865	2.17808	1.29305	3.266e+07
Australia	2085	Pacific OECD	SSP4	135318	30053023	3.91119	2.01564	4.99917e+07
Australia	2085	Pacific OECD	SSP5	198319	40027685	5.73216	2.78686	9.74543e+07
Australia	2090	Pacific OECD	SSP1	153713	33344692	4.44288	2.24113	6.2986e+07
Australia	2090	Pacific OECD	SSP2	130991	35026830	3.78613	1.96724	5.65701e+07
Australia	2090	Pacific OECD	SSP3	75552.3	35309185	2.18374	1.2959	3.33219e+07
Australia	2090	Pacific OECD	SSP4	141095	29520640	4.07817	2.08519	5.11593e+07
Australia	2090	Pacific OECD	SSP5	216818	39809501	6.26685	3.01077	1.05837e+08
Australia	2095	Pacific OECD	SSP1	161787	32587951	4.67625	2.33832	6.4724e+07
Australia	2095	Pacific OECD	SSP2	137453	35013541	3.9729	2.04551	5.92891e+07
Australia	2095	Pacific OECD	SSP3	75657.9	35949400	2.18679	1.2977	3.39906e+07
Australia	2095	Pacific OECD	SSP4	146706	28844743	4.24035	2.15261	5.19328e+07
Australia	2095	Pacific OECD	SSP5	236453	39207693	6.83437	3.24814	1.13544e+08
Australia	2100	Pacific OECD	SSP1	169700	31663501	4.90496	2.43343	6.58994e+07
Australia	2100	Pacific OECD	SSP2	143849	34921482	4.15777	2.12291	6.18362e+07
Australia	2100	Pacific OECD	SSP3	75660.7	36632735	2.18688	1.29829	3.46582e+07
Australia	2100	Pacific OECD	SSP4	152084	28056163	4.39579	2.21712	5.23229e+07
Australia	2100	Pacific OECD	SSP5	256973	38344491	7.42748	3.49601	1.20548e+08
Austria	2003	Western Europe	Historical	47600	8121423	2.17456	0.6756	5.48683e+06
Austria	2004	Western Europe	Historical	48600	8171966	2.16612	0.74873	6.1186e+06
Austria	2005	Western Europe	Historical	49400	8227829	2.37324	0.76023	6.25504e+06
Austria	2008	Western Europe	Historical	53166.1	8321496	2.56945	0.7428	6.18121e+06
Austria	2010	Western Europe	Historical	51843.4	8363404	2.7261	0.66793	5.58617e+06
Austria	2012	Western Europe	Historical	53297.4	8429991	2.91472	0.78395	6.60869e+06
Austria	2014	Western Europe	Historical	52932.9	8546356	3.08429	0.79124	6.76222e+06
Austria	2016	Western Europe	Historical	53345.7	8736668	3.11655	0.82081	7.17114e+06
Austria	2018	Western Europe	Historical	55217.3	8840521	3.09182	0.8301	7.33852e+06
Austria	2020	Western Europe	Historical	51854.7	8916864	3.20149	0.8914	7.94849e+06
Austria	2020	Western Europe	SSP1	48964	8901100	1.41524	0.8914	5.34348e+06
Austria	2020	Western Europe	SSP2	48964	8901100	1.41524	0.8914	5.34348e+06
Austria	2020	Western Europe	SSP3	48964	8901100	1.41524	0.8914	5.34348e+06
Austria	2020	Western Europe	SSP4	48964	8901100	1.41524	0.8914	5.34348e+06
Austria	2020	Western Europe	SSP5	48964	8901100	1.41524	0.8914	5.34348e+06
Austria	2025	Western Europe	SSP1	53588.2	9051197	1.5489	0.947537	5.94169e+06
Austria	2025	Western Europe	SSP2	53626.4	9044760	1.55	0.947994	5.9416e+06
Austria	2025	Western Europe	SSP3	53893.6	8999906	1.55773	0.951195	5.94094e+06
Austria	2025	Western Europe	SSP4	53742.7	9025183	1.55336	0.949387	5.94131e+06
Austria	2025	Western Europe	SSP5	52990.8	9153229	1.53163	0.940383	5.94318e+06
Austria	2030	Western Europe	SSP1	58582.6	9123096	1.69325	1.0081	6.54136e+06
Austria	2030	Western Europe	SSP2	58594.9	9105749	1.69361	1.00823	6.53016e+06
Austria	2030	Western Europe	SSP3	58993.7	9013128	1.70514	1.01299	6.5066e+06
Austria	2030	Western Europe	SSP4	59045.5	9048757	1.70663	1.01364	6.53826e+06
Austria	2030	Western Europe	SSP5	57401.5	9341739	1.65912	0.993964	6.56613e+06
Austria	2035	Western Europe	SSP1	62890.7	9182580	1.81778	1.06033	7.06366e+06
Austria	2035	Western Europe	SSP2	62279.3	9151673	1.8001	1.0529	6.97188e+06
Austria	2035	Western Europe	SSP3	61704.1	9008367	1.78348	1.04582	6.7989e+06
Austria	2035	Western Europe	SSP4	63559.8	9039655	1.83711	1.06832	7.02594e+06
Austria	2035	Western Europe	SSP5	62196.8	9532410	1.79772	1.05221	7.25533e+06
Austria	2040	Western Europe	SSP1	67598.9	9233969	1.95386	1.1174	7.63022e+06
Austria	2040	Western Europe	SSP2	65975.1	9189610	1.90693	1.0977	7.41248e+06
Austria	2040	Western Europe	SSP3	63610.2	8993400	1.83857	1.06889	6.99515e+06
Austria	2040	Western Europe	SSP4	68215.2	9004459	1.97167	1.12468	7.50613e+06
Austria	2040	Western Europe	SSP5	68421.5	9727351	1.97764	1.12777	8.13872e+06
Austria	2045	Western Europe	SSP1	72290.3	9292326	2.08946	1.17428	8.20696e+06
Austria	2045	Western Europe	SSP2	69642	9230024	2.01291	1.14215	7.85537e+06
Austria	2045	Western Europe	SSP3	65021.4	8968686	1.87936	1.08597	7.12906e+06
Austria	2045	Western Europe	SSP4	72549.5	8965509	2.09695	1.17716	7.9441e+06
Austria	2045	Western Europe	SSP5	75280.2	9938802	2.17588	1.21102	9.14308e+06
Austria	2050	Western Europe	SSP1	76515.8	9348031	2.21159	1.22551	8.73507e+06
Austria	2050	Western Europe	SSP2	73140.4	9265949	2.11403	1.18456	8.27888e+06
Austria	2050	Western Europe	SSP3	65999.9	8935709	1.90764	1.09779	7.20853e+06
Austria	2050	Western Europe	SSP4	76219.7	8913651	2.20303	1.22157	8.29407e+06
Austria	2050	Western Europe	SSP5	81954.2	10152750	2.36878	1.29204	1.01625e+07
Austria	2055	Western Europe	SSP1	80642	9375750	2.33085	1.27552	9.22981e+06
Austria	2055	Western Europe	SSP2	76687.5	9280678	2.21655	1.22754	8.69093e+06
Austria	2055	Western Europe	SSP3	66726.6	8892535	1.92865	1.10656	7.25167e+06
Austria	2055	Western Europe	SSP4	79631.6	8833168	2.30165	1.26284	8.58369e+06
Austria	2055	Western Europe	SSP5	88968.6	10339320	2.57152	1.37716	1.12293e+07
Austria	2060	Western Europe	SSP1	85033.7	9365927	2.45779	1.32871	9.71832e+06
Austria	2060	Western Europe	SSP2	80451.7	9277235	2.32535	1.27313	9.1107e+06
Austria	2060	Western Europe	SSP3	67238.1	8856541	1.94343	1.11273	7.27694e+06
Austria	2060	Western Europe	SSP4	83160.6	8726963	2.40365	1.3055	8.8528e+06
Austria	2060	Western Europe	SSP5	96805.5	10487494	2.79804	1.47221	1.23871e+07
Austria	2065	Western Europe	SSP1	89775.4	9321301	2.59484	1.38611	1.02071e+07
Austria	2065	Western Europe	SSP2	84487.6	9256742	2.44201	1.32201	9.54298e+06
Austria	2065	Western Europe	SSP3	67578.9	8835167	1.95328	1.11684	7.2957e+06
Austria	2065	Western Europe	SSP4	86889.9	8599237	2.51144	1.35058	9.11082e+06
Austria	2065	Western Europe	SSP5	105609	10586809	3.05249	1.57894	1.36342e+07
Austria	2070	Western Europe	SSP1	94551.3	9263020	2.73288	1.44392	1.06787e+07
Austria	2070	Western Europe	SSP2	88541.9	9233560	2.55919	1.3711	9.97239e+06
Austria	2070	Western Europe	SSP3	67635.2	8834274	1.95491	1.11752	7.30098e+06
Austria	2070	Western Europe	SSP4	90539.9	8463732	2.61694	1.39468	9.34055e+06
Austria	2070	Western Europe	SSP5	115028	10658085	3.32474	1.69309	1.49427e+07
Austria	2075	Western Europe	SSP1	99216.8	9197004	2.86773	1.50038	1.11219e+07
Austria	2075	Western Europe	SSP2	92541.9	9203610	2.6748	1.41953	1.03858e+07
Austria	2075	Western Europe	SSP3	67451.2	8841945	1.94959	1.1153	7.28766e+06
Austria	2075	Western Europe	SSP4	94024.1	8316082	2.71765	1.43677	9.5276e+06
Austria	2075	Western Europe	SSP5	124907	10705691	3.61028	1.8128	1.6291e+07
Austria	2080	Western Europe	SSP1	103705	9108754	2.99746	1.55468	1.15098e+07
Austria	2080	Western Europe	SSP2	96440.9	9152434	2.7875	1.46672	1.07599e+07
Austria	2080	Western Europe	SSP3	67024.7	8847822	1.93726	1.11014	7.24684e+06
Austria	2080	Western Europe	SSP4	97312.5	8141762	2.81269	1.47646	9.65106e+06
Austria	2080	Western Europe	SSP5	135187	10714321	3.90741	1.93733	1.76385e+07
Austria	2085	Western Europe	SSP1	108188	8933748	3.12704	1.60884	1.17725e+07
Austria	2085	Western Europe	SSP2	100246	9072690	2.89748	1.51275	1.10838e+07
Austria	2085	Western Europe	SSP3	66355	8857286	1.91791	1.10203	7.1828e+06
Austria	2085	Western Europe	SSP4	100430	7933180	2.9028	1.51406	9.70207e+06
Austria	2085	Western Europe	SSP5	146089	10614440	4.22252	2.06932	1.88749e+07
Austria	2090	Western Europe	SSP1	112670	8675261	3.25658	1.66293	1.19011e+07
Austria	2090	Western Europe	SSP2	103952	8969118	3.0046	1.55756	1.13592e+07
Austria	2090	Western Europe	SSP3	65449.2	8882386	1.89173	1.09108	7.10588e+06
Austria	2090	Western Europe	SSP4	103382	7694720	2.98812	1.54962	9.68411e+06
Austria	2090	Western Europe	SSP5	157657	10405691	4.55687	2.20928	1.99601e+07
Austria	2095	Western Europe	SSP1	117157	8344018	3.38627	1.71701	1.1898e+07
Austria	2095	Western Europe	SSP2	107560	8850122	3.10888	1.60117	1.15944e+07
Austria	2095	Western Europe	SSP3	64347.4	8930330	1.85988	1.07777	7.02539e+06
Austria	2095	Western Europe	SSP4	106174	7434909	3.06882	1.58324	9.60703e+06
Austria	2095	Western Europe	SSP5	169925	10095729	4.91146	2.35764	2.08634e+07
Austria	2100	Western Europe	SSP1	121497	7983852	3.51171	1.76929	1.18018e+07
Austria	2100	Western Europe	SSP2	111043	8721110	3.20956	1.64325	1.17924e+07
Austria	2100	Western Europe	SSP3	63104.8	8994256	1.82396	1.06277	6.94075e+06
Austria	2100	Western Europe	SSP4	108792	7160169	3.14449	1.61473	9.47751e+06
Austria	2100	Western Europe	SSP5	182726	9724607	5.28146	2.5124	2.16015e+07
Azerbaijan	2003	Former Soviet Union	Historical	5180.69	8234100	0.32496	0.36351	2.99318e+06
Azerbaijan	2004	Former Soviet Union	Historical	5610.76	8306500	0.29831	0.38607	3.20689e+06
Azerbaijan	2005	Former Soviet Union	Historical	7106.6	8391850	0.21994	0.37733	3.1665e+06
Azerbaijan	2008	Former Soviet Union	Historical	12672.4	8763400	0.16554	0.4609	4.03905e+06
Azerbaijan	2010	Former Soviet Union	Historical	14082.2	9054332	0.21848	0.45706	4.13837e+06
Azerbaijan	2012	Former Soviet Union	Historical	14027.5	9295784	0.21427	0.49838	4.63283e+06
Azerbaijan	2014	Former Soviet Union	Historical	14867.9	9535079	0.20978	0.5472	5.2176e+06
Azerbaijan	2016	Former Soviet Union	Historical	14232.2	9757812	0.20637	0.62741	6.12215e+06
Azerbaijan	2018	Former Soviet Union	Historical	14209.6	9939771	0.18416	0.6574	6.53441e+06
Azerbaijan	2020	Former Soviet Union	Historical	13726.8	10093121	0.2239	0.71	7.16612e+06
Azerbaijan	2020	Former Soviet Union	SSP1	13493.3	10273527	0.390007	0.71	1.76444e+06
Azerbaijan	2020	Former Soviet Union	SSP2	13493.3	10273527	0.390007	0.71	1.76444e+06
Azerbaijan	2020	Former Soviet Union	SSP3	13493.3	10273527	0.390007	0.71	1.76444e+06
Azerbaijan	2020	Former Soviet Union	SSP4	13493.3	10273527	0.390007	0.71	1.76444e+06
Azerbaijan	2020	Former Soviet Union	SSP5	13493.3	10273527	0.390007	0.71	1.76444e+06
Azerbaijan	2025	Former Soviet Union	SSP1	15730.9	10487827	0.454681	0.737278	2.08734e+06
Azerbaijan	2025	Former Soviet Union	SSP2	15724.3	10492207	0.454491	0.737202	2.08741e+06
Azerbaijan	2025	Former Soviet Union	SSP3	15692.8	10513273	0.45358	0.736837	2.08777e+06
Azerbaijan	2025	Former Soviet Union	SSP4	15770.2	10461682	0.455817	0.737733	2.0869e+06
Azerbaijan	2025	Former Soviet Union	SSP5	15733.4	10486140	0.454754	0.737307	2.08731e+06
Azerbaijan	2030	Former Soviet Union	SSP1	17410.5	10717747	0.503228	0.75781	2.35315e+06
Azerbaijan	2030	Former Soviet Union	SSP2	17375.7	10728570	0.502222	0.757397	2.3511e+06
Azerbaijan	2030	Former Soviet Union	SSP3	17293.8	10789254	0.499855	0.756454	2.35422e+06
Azerbaijan	2030	Former Soviet Union	SSP4	17560.3	10638984	0.507558	0.759561	2.35449e+06
Azerbaijan	2030	Former Soviet Union	SSP5	17433.2	10717891	0.503884	0.758085	2.35613e+06
Azerbaijan	2035	Former Soviet Union	SSP1	19195.2	10922182	0.554813	0.779594	2.63597e+06
Azerbaijan	2035	Former Soviet Union	SSP2	18860	10942531	0.545124	0.77555	2.59663e+06
Azerbaijan	2035	Former Soviet Union	SSP3	18439.9	11059557	0.532982	0.770556	2.56916e+06
Azerbaijan	2035	Former Soviet Union	SSP4	19349.1	10760890	0.559261	0.781328	2.6157e+06
Azerbaijan	2035	Former Soviet Union	SSP5	19610.4	10927925	0.566813	0.784628	2.69237e+06
Azerbaijan	2040	Former Soviet Union	SSP1	21433.6	11069437	0.619511	0.806828	2.97297e+06
Azerbaijan	2040	Former Soviet Union	SSP2	20401.4	11101501	0.589676	0.79435	2.84306e+06
Azerbaijan	2040	Former Soviet Union	SSP3	19043.8	11291451	0.550437	0.778058	2.70775e+06
Azerbaijan	2040	Former Soviet Union	SSP4	21257.5	10795950	0.614421	0.804474	2.87411e+06
Azerbaijan	2040	Former Soviet Union	SSP5	22886.3	11084218	0.661499	0.824438	3.17213e+06
Azerbaijan	2045	Former Soviet Union	SSP1	24416	11135987	0.705713	0.843009	3.39376e+06
Azerbaijan	2045	Former Soviet Union	SSP2	22316.2	11172021	0.645021	0.817602	3.12089e+06
Azerbaijan	2045	Former Soviet Union	SSP3	19444.4	11430011	0.562015	0.783023	2.79772e+06
Azerbaijan	2045	Former Soviet Union	SSP4	23621.3	10738010	0.682743	0.833061	3.16565e+06
Azerbaijan	2045	Former Soviet Union	SSP5	27419.4	11163397	0.792523	0.879414	3808507
Azerbaijan	2050	Former Soviet Union	SSP1	27973.2	11124802	0.808529	0.886091	3.86962e+06
Azerbaijan	2050	Former Soviet Union	SSP2	24731.1	11165344	0.714821	0.84685	3.44559e+06
Azerbaijan	2050	Former Soviet Union	SSP3	19920.7	11497208	0.575782	0.788847	2.88113e+06
Azerbaijan	2050	Former Soviet Union	SSP4	26508.1	10595346	0.766183	0.867916	3.49289e+06
Azerbaijan	2050	Former Soviet Union	SSP5	32794.6	11168793	0.947886	0.944531	4.53763e+06
Azerbaijan	2055	Former Soviet Union	SSP1	31965.2	11058857	0.923913	0.934395	4.38088e+06
Azerbaijan	2055	Former Soviet Union	SSP2	27554.3	11110897	0.796422	0.881005	3.80828e+06
Azerbaijan	2055	Former Soviet Union	SSP3	20418	11533727	0.590156	0.7949	2.9601e+06
Azerbaijan	2055	Former Soviet Union	SSP4	29800.6	10392342	0.861348	0.907636	3.83875e+06
Azerbaijan	2055	Former Soviet Union	SSP5	38911.8	11123102	1.1247	1.0186	5.34289e+06
Azerbaijan	2060	Former Soviet Union	SSP1	36438.4	10956788	1.05321	0.988499	4.93325e+06
Azerbaijan	2060	Former Soviet Union	SSP2	30776.4	11032795	0.889552	0.919973	4.21144e+06
Azerbaijan	2060	Former Soviet Union	SSP3	20881.3	11570528	0.603547	0.800542	3.03482e+06
Azerbaijan	2060	Former Soviet Union	SSP4	33536	10149434	0.969315	0.952689	4.20629e+06
Azerbaijan	2060	Former Soviet Union	SSP5	45917	11044154	1.32717	1.10339	6.24145e+06
Azerbaijan	2065	Former Soviet Union	SSP1	41387.9	10825171	1.19626	1.04835	5.52188e+06
Azerbaijan	2065	Former Soviet Union	SSP2	34383.3	10931864	0.993805	0.963585	4.64966e+06
Azerbaijan	2065	Former Soviet Union	SSP3	21299.6	11600314	0.615638	0.805634	3.10169e+06
Azerbaijan	2065	Former Soviet Union	SSP4	37679	9874235	1.08906	1.00265	4.5856e+06
Azerbaijan	2065	Former Soviet Union	SSP5	53891.1	10936561	1.55765	1.1999	7.23612e+06
Azerbaijan	2070	Former Soviet Union	SSP1	46776	10659708	1.352	1.11348	6.1318e+06
Azerbaijan	2070	Former Soviet Union	SSP2	38354.3	10801252	1.10858	1.01158	5.11254e+06
Azerbaijan	2070	Former Soviet Union	SSP3	21667.7	11617575	0.626277	0.810106	3.15827e+06
Azerbaijan	2070	Former Soviet Union	SSP4	42182	9563011	1.21922	1.05695	4.9603e+06
Azerbaijan	2070	Former Soviet Union	SSP5	62874.5	10795695	1.81731	1.30861	8.31649e+06
Azerbaijan	2075	Former Soviet Union	SSP1	52583	10456246	1.51984	1.18366	6.74858e+06
Azerbaijan	2075	Former Soviet Union	SSP2	42701.1	10639155	1.23422	1.06411	5.59463e+06
Azerbaijan	2075	Former Soviet Union	SSP3	22010	11627704	0.636171	0.814261	3.20934e+06
Azerbaijan	2075	Former Soviet Union	SSP4	47017.6	9216430	1.35898	1.11525	5.31782e+06
Azerbaijan	2075	Former Soviet Union	SSP5	72932	10617367	2.10801	1.43029	9.47112e+06
Azerbaijan	2080	Former Soviet Union	SSP1	58833.9	10217970	1.70052	1.25919	7.36654e+06
Azerbaijan	2080	Former Soviet Union	SSP2	47458.5	10450946	1.37173	1.12158	6.09636e+06
Azerbaijan	2080	Former Soviet Union	SSP3	22339.2	11647717	0.645686	0.818265	3.2615e+06
Azerbaijan	2080	Former Soviet Union	SSP4	52215.6	8840499	1.50922	1.17791	5.65488e+06
Azerbaijan	2080	Former Soviet Union	SSP5	84190.7	10404182	2.43342	1.56651	1.06981e+07
Azerbaijan	2085	Former Soviet Union	SSP1	65574.9	9958133	1.89536	1.34064	7.99028e+06
Azerbaijan	2085	Former Soviet Union	SSP2	52662.2	10254524	1.52213	1.18446	6.62655e+06
Azerbaijan	2085	Former Soviet Union	SSP3	22661.6	11693645	0.655004	0.822208	3.32046e+06
Azerbaijan	2085	Former Soviet Union	SSP4	57820.6	8452368	1.67123	1.24549	5.97785e+06
Azerbaijan	2085	Former Soviet Union	SSP5	96816	10167755	2.79834	1.71925	1.20081e+07
Azerbaijan	2090	Former Soviet Union	SSP1	72796.3	9693000	2.10408	1.4279	8.62338e+06
Azerbaijan	2090	Former Soviet Union	SSP2	58316.3	10059084	1.68556	1.25279	7.18763e+06
Azerbaijan	2090	Former Soviet Union	SSP3	22972.9	11762852	0.664002	0.826034	3.38513e+06
Azerbaijan	2090	Former Soviet Union	SSP4	63842.4	8062178	1.84528	1.31812	6.28745e+06
Azerbaijan	2090	Former Soviet Union	SSP5	110920	9922042	3.206	1.8899	1.34111e+07
Azerbaijan	2095	Former Soviet Union	SSP1	80371.1	9436565	2.32302	1.51945	9.25917e+06
Azerbaijan	2095	Former Soviet Union	SSP2	64347.7	9868492	1.85989	1.3257	7.77094e+06
Azerbaijan	2095	Former Soviet Union	SSP3	23246.3	11851646	0.671904	0.829418	3.45078e+06
Azerbaijan	2095	Former Soviet Union	SSP4	70199.9	7672622	2.02904	1.39482	6.57212e+06
Azerbaijan	2095	Former Soviet Union	SSP5	126457	9679483	3.65508	2.07792	1.49031e+07
Azerbaijan	2100	Former Soviet Union	SSP1	88256.9	9185424	2.55095	1.61478	9.88833e+06
Azerbaijan	2100	Former Soviet Union	SSP2	70749.5	9673474	2.04492	1.40309	8.36601e+06
Azerbaijan	2100	Former Soviet Union	SSP3	23485.1	11958146	0.678807	0.832397	3.51741e+06
Azerbaijan	2100	Former Soviet Union	SSP4	76885	7274446	2.22226	1.47548	6.81781e+06
Azerbaijan	2100	Former Soviet Union	SSP5	143478	9436804	4.14705	2.28391	1.64734e+07
Belarus	2003	Former Soviet Union	Historical	9660.19	9796749	0.61147	0.3965	3.88441e+06
Belarus	2004	Former Soviet Union	Historical	10800	9730146	0.62759	0.48884	4.75648e+06
Belarus	2005	Former Soviet Union	Historical	11900	9663915	0.67852	0.53184	5.13966e+06
Belarus	2008	Former Soviet Union	Historical	15942.9	9527985	0.74147	0.5213	4.96694e+06
Belarus	2010	Former Soviet Union	Historical	17300.7	9483836	0.66913	0.48996	4.6467e+06
Belarus	2012	Former Soviet Union	Historical	18611.5	9446836	0.64603	0.609	5.75312e+06
Belarus	2014	Former Soviet Union	Historical	19119.3	9448515	0.50548	0.60529	5.71909e+06
Belarus	2016	Former Soviet Union	Historical	17883.2	9469379	0.50063	0.66249	6.27337e+06
Belarus	2018	Former Soviet Union	Historical	18974.7	9438785	0.60443	0.7641	7.21218e+06
Belarus	2020	Former Soviet Union	Historical	19239.6	9379952	0.53901	0.8084	7.58275e+06
Belarus	2020	Former Soviet Union	SSP1	18677.7	9661039	0.539855	0.8084	2.2612e+06
Belarus	2020	Former Soviet Union	SSP2	18677.7	9661039	0.539855	0.8084	2.2612e+06
Belarus	2020	Former Soviet Union	SSP3	18677.7	9661039	0.539855	0.8084	2.2612e+06
Belarus	2020	Former Soviet Union	SSP4	18677.7	9661039	0.539855	0.8084	2.2612e+06
Belarus	2020	Former Soviet Union	SSP5	18677.7	9661039	0.539855	0.8084	2.2612e+06
Belarus	2025	Former Soviet Union	SSP1	19581	9405880	0.565964	0.819136	2.30247e+06
Belarus	2025	Former Soviet Union	SSP2	19606.5	9393647	0.566701	0.819435	2.30228e+06
Belarus	2025	Former Soviet Union	SSP3	19620.1	9387127	0.567094	0.819595	2.30218e+06
Belarus	2025	Former Soviet Union	SSP4	19644.3	9375575	0.567793	0.819879	2.30201e+06
Belarus	2025	Former Soviet Union	SSP5	19555.5	9418141	0.565227	0.818837	2.30265e+06
Belarus	2030	Former Soviet Union	SSP1	20725	9247082	0.59903	0.832866	2.39055e+06
Belarus	2030	Former Soviet Union	SSP2	20781.6	9216821	0.600666	0.833527	2.38883e+06
Belarus	2030	Former Soviet Union	SSP3	20800.1	9200499	0.6012	0.833738	2.38654e+06
Belarus	2030	Former Soviet Union	SSP4	20901.2	9165017	0.604122	0.834934	2.38829e+06
Belarus	2030	Former Soviet Union	SSP5	20661.6	9283902	0.597197	0.832128	2.39322e+06
Belarus	2035	Former Soviet Union	SSP1	22424.7	9098792	0.648157	0.853336	2.53847e+06
Belarus	2035	Former Soviet Union	SSP2	22290.4	9048719	0.644275	0.851668	2.50941e+06
Belarus	2035	Former Soviet Union	SSP3	21980.5	9022948	0.635318	0.847894	2.4682e+06
Belarus	2035	Former Soviet Union	SSP4	22597.6	8943588	0.653155	0.855305	2.51278e+06
Belarus	2035	Former Soviet Union	SSP5	22687.6	9172707	0.655756	0.85658	2.58885e+06
Belarus	2040	Former Soviet Union	SSP1	24678.5	8965475	0.7133	0.88053	2.74508e+06
Belarus	2040	Former Soviet Union	SSP2	23929.6	8899873	0.691654	0.871405	2.64379e+06
Belarus	2040	Former Soviet Union	SSP3	22768.7	8872813	0.6581	0.85732	2.51078e+06
Belarus	2040	Former Soviet Union	SSP4	24593.3	8717248	0.710838	0.879297	2.65833e+06
Belarus	2040	Former Soviet Union	SSP5	25894.6	9086235	0.74845	0.895359	2.91679e+06
Belarus	2045	Former Soviet Union	SSP1	27408.2	8850961	0.792199	0.913504	3.00187e+06
Belarus	2045	Former Soviet Union	SSP2	25686.7	8772191	0.742441	0.892587	2.79167e+06
Belarus	2045	Former Soviet Union	SSP3	23163.9	8745759	0.669523	0.862005	2.5158e+06
Belarus	2045	Former Soviet Union	SSP4	26845	8501702	0.77592	0.906399	2.82302e+06
Belarus	2045	Former Soviet Union	SSP5	30048.4	9025723	0.86851	0.945627	3.35108e+06
Belarus	2050	Former Soviet Union	SSP1	30377.7	8737987	0.878028	0.949384	3.27707e+06
Belarus	2050	Former Soviet Union	SSP2	27628.8	8651725	0.798575	0.916015	2.95603e+06
Belarus	2050	Former Soviet Union	SSP3	23413	8631519	0.676723	0.86493	2.50818e+06
Belarus	2050	Former Soviet Union	SSP4	29287.2	8286837	0.846509	0.93581	2.99539e+06
Belarus	2050	Former Soviet Union	SSP5	34591.6	8972830	0.999826	1.00062	3.82487e+06
Belarus	2055	Former Soviet Union	SSP1	33749.4	8607963	0.975483	0.990122	3.57899e+06
Belarus	2055	Former Soviet Union	SSP2	29969.5	8522400	0.86623	0.944265	3.1526e+06
Belarus	2055	Former Soviet Union	SSP3	23773.2	8514283	0.687134	0.869199	2.51046e+06
Belarus	2055	Former Soviet Union	SSP4	32080.7	8061844	0.927251	0.969467	3.18541e+06
Belarus	2055	Former Soviet Union	SSP5	39753.2	8908021	1.14902	1.06309	4.35376e+06
Belarus	2060	Former Soviet Union	SSP1	37655	8459214	1.08837	1.03731	3.91634e+06
Belarus	2060	Former Soviet Union	SSP2	32795.2	8386822	0.947903	0.978385	3.3886e+06
Belarus	2060	Former Soviet Union	SSP3	24262	8401050	0.701262	0.875029	2.52605e+06
Belarus	2060	Former Soviet Union	SSP4	35335.6	7828704	1.02133	1.00871	3.40049e+06
Belarus	2060	Former Soviet Union	SSP5	45795.4	8827687	1.32366	1.13622	4.96005e+06
Belarus	2065	Former Soviet Union	SSP1	42110.8	8296411	1.21716	1.09116	4.28768e+06
Belarus	2065	Former Soviet Union	SSP2	36101	8246501	1.04345	1.01832	3.6612e+06
Belarus	2065	Former Soviet Union	SSP3	24818.9	8300827	0.717358	0.881694	2.55124e+06
Belarus	2065	Former Soviet Union	SSP4	39056.7	7587496	1.12888	1.05359	3.63625e+06
Belarus	2065	Former Soviet Union	SSP5	52854	8728294	1.52768	1.22164	5.64981e+06
Belarus	2070	Former Soviet Union	SSP1	46925.3	8124806	1.35632	1.14934	4.67171e+06
Belarus	2070	Former Soviet Union	SSP2	39707.4	8107916	1.14769	1.06189	3.95298e+06
Belarus	2070	Former Soviet Union	SSP3	25276.9	8229786	0.730596	0.887185	2.57459e+06
Belarus	2070	Former Soviet Union	SSP4	43075.9	7340162	1.24505	1.10208	3.87362e+06
Belarus	2070	Former Soviet Union	SSP5	60811.2	8613306	1.75767	1.31794	6.40482e+06
Belarus	2075	Former Soviet Union	SSP1	51998.3	7944717	1.50294	1.21065	5.05523e+06
Belarus	2075	Former Soviet Union	SSP2	43542.1	7971994	1.25853	1.10823	4.25615e+06
Belarus	2075	Former Soviet Union	SSP3	25608.4	8194897	0.740178	0.891172	2.59636e+06
Belarus	2075	Former Soviet Union	SSP4	47308.8	7087578	1.3674	1.15315	4.1023e+06
Belarus	2075	Former Soviet Union	SSP5	69628.5	8482029	2.01252	1.42465	7.21226e+06
Belarus	2080	Former Soviet Union	SSP1	57361.7	7754328	1.65797	1.27546	5.43669e+06
Belarus	2080	Former Soviet Union	SSP2	47654.1	7836704	1.37738	1.15794	4.57342e+06
Belarus	2080	Former Soviet Union	SSP3	25883.5	8194464	0.748129	0.894504	2.62352e+06
Belarus	2080	Former Soviet Union	SSP4	51788	6831010	1.49687	1.2072	4.32303e+06
Belarus	2080	Former Soviet Union	SSP5	79409.7	8331945	2.29524	1.54301	8.07085e+06
Belarus	2085	Former Soviet Union	SSP1	63093	7553928	1.82362	1.34473	5.81941e+06
Belarus	2085	Former Soviet Union	SSP2	52139.7	7702511	1.50703	1.21216	4.9128e+06
Belarus	2085	Former Soviet Union	SSP3	26196.4	8219542	0.757173	0.898315	2.66287e+06
Belarus	2085	Former Soviet Union	SSP4	56570.3	6574952	1.63509	1.26492	4.54052e+06
Belarus	2085	Former Soviet Union	SSP5	90325.5	8162236	2.61074	1.6751	8.98463e+06
Belarus	2090	Former Soviet Union	SSP1	69275	7349242	2.00231	1.41945	6.21086e+06
Belarus	2090	Former Soviet Union	SSP2	57093.1	7570721	1.6502	1.27206	5.2822e+06
Belarus	2090	Former Soviet Union	SSP3	26598.7	8258164	0.768801	0.903219	2.71589e+06
Belarus	2090	Former Soviet Union	SSP4	61728	6322848	1.78417	1.3272	4.76017e+06
Belarus	2090	Former Soviet Union	SSP5	102574	7976710	2.96477	1.82333	9.96275e+06
Belarus	2095	Former Soviet Union	SSP1	75905	7147261	2.19394	1.4996	6.61302e+06
Belarus	2095	Former Soviet Union	SSP2	62536.8	7437816	1.80755	1.3379	5.67915e+06
Belarus	2095	Former Soviet Union	SSP3	27069.1	8301214	0.782398	0.908952	2.77764e+06
Belarus	2095	Former Soviet Union	SSP4	67284	6070547	1.94476	1.3943	4.97756e+06
Belarus	2095	Former Soviet Union	SSP5	116267	7780196	3.36055	1.98904	1.10066e+07
Belarus	2100	Former Soviet Union	SSP1	82947.5	6944830	2.39749	1.58475	7.01705e+06
Belarus	2100	Former Soviet Union	SSP2	68450.2	7293725	1.97847	1.40941	6.09075e+06
Belarus	2100	Former Soviet Union	SSP3	27556.3	8345766	0.79648	0.91489	2.8421e+06
Belarus	2100	Former Soviet Union	SSP4	73252.7	5805768	2.11728	1.46639	5.17898e+06
Belarus	2100	Former Soviet Union	SSP5	131483	7568795	3.80035	2.17319	1.21013e+07
Belgium	2003	Western Europe	Historical	44200	10376133	1.84119	0.67008	6.95284e+06
Belgium	2004	Western Europe	Historical	45500	10421137	1.8205	0.75247	7.84159e+06
Belgium	2005	Western Europe	Historical	46300	10478617	1.79061	0.73806	7.73385e+06
Belgium	2008	Western Europe	Historical	48423.5	10709973	1.93684	0.6779	7.26029e+06
Belgium	2010	Western Europe	Historical	47972.6	10895586	2.06188	0.72246	7.87163e+06
Belgium	2012	Western Europe	Historical	48210.9	11106932	2.28114	0.77181	8.57244e+06
Belgium	2014	Western Europe	Historical	48748.6	11209057	2.37002	0.75638	8.47831e+06
Belgium	2016	Western Europe	Historical	49829.9	11331422	2.52338	0.7874	8.92236e+06
Belgium	2018	Western Europe	Historical	51113.5	11427054	2.86018	0.808	9.23306e+06
Belgium	2020	Western Europe	Historical	49031	11538604	3.39697	0.8047	9.28511e+06
Belgium	2020	Western Europe	SSP1	45791.7	11541270	1.32355	0.8047	6.50951e+06
Belgium	2020	Western Europe	SSP2	45791.7	11541270	1.32355	0.8047	6.50951e+06
Belgium	2020	Western Europe	SSP3	45791.7	11541270	1.32355	0.8047	6.50951e+06
Belgium	2020	Western Europe	SSP4	45791.7	11541270	1.32355	0.8047	6.50951e+06
Belgium	2020	Western Europe	SSP5	45791.7	11541270	1.32355	0.8047	6.50951e+06
Belgium	2025	Western Europe	SSP1	51790.5	11699086	1.49694	0.877494	7.45015e+06
Belgium	2025	Western Europe	SSP2	51817.1	11693098	1.49771	0.877812	7.45004e+06
Belgium	2025	Western Europe	SSP3	52022.4	11646931	1.50364	0.880261	7.44916e+06
Belgium	2025	Western Europe	SSP4	51938.3	11665792	1.50121	0.879258	7.44952e+06
Belgium	2025	Western Europe	SSP5	51295.4	11812005	1.48263	0.871588	7.45229e+06
Belgium	2030	Western Europe	SSP1	55575.6	11826698	1.60634	0.923449	8.0749e+06
Belgium	2030	Western Europe	SSP2	55612.6	11812401	1.60741	0.923885	8.07029e+06
Belgium	2030	Western Europe	SSP3	55948.1	11721054	1.61711	0.927876	8.05466e+06
Belgium	2030	Western Europe	SSP4	56007.1	11731395	1.61881	0.928599	8.07025e+06
Belgium	2030	Western Europe	SSP5	54551.4	12070040	1.57674	0.911238	8.09367e+06
Belgium	2035	Western Europe	SSP1	59004.8	11960940	1.70546	0.965097	8.66471e+06
Belgium	2035	Western Europe	SSP2	58763.3	11938724	1.69848	0.962154	8.61347e+06
Belgium	2035	Western Europe	SSP3	58353.3	11806410	1.68663	0.95708	8.45811e+06
Belgium	2035	Western Europe	SSP4	59575.4	11776124	1.72195	0.97186	8.61046e+06
Belgium	2035	Western Europe	SSP5	58337.8	12351143	1.68618	0.957332	8.85147e+06
Belgium	2040	Western Europe	SSP1	62308.3	12099271	1.80094	1.00523	9.25045e+06
Belgium	2040	Western Europe	SSP2	61505.5	12073326	1.77774	0.99548	9.11295e+06
Belgium	2040	Western Europe	SSP3	59592.8	11908656	1.72245	0.972178	8.71115e+06
Belgium	2040	Western Europe	SSP4	62759.8	11797198	1.81399	1.01045	9.08114e+06
Belgium	2040	Western Europe	SSP5	63031.2	12648878	1.82184	1.01443	9.78702e+06
Belgium	2045	Western Europe	SSP1	65459.2	12239867	1.89201	1.04351	9.82651e+06
Belgium	2045	Western Europe	SSP2	63985.9	12209279	1.84943	1.02564	9.58375e+06
Belgium	2045	Western Europe	SSP3	60116.3	12006667	1.73758	0.978598	8.85994e+06
Belgium	2045	Western Europe	SSP4	65532.3	11807545	1.89413	1.04404	9.48576e+06
Belgium	2045	Western Europe	SSP5	68267.4	12957836	1.97318	1.07811	1.08512e+07
Belgium	2050	Western Europe	SSP1	68458.9	12372183	1.97872	1.07995	1.03836e+07
Belgium	2050	Western Europe	SSP2	66374	12342674	1.91846	1.05467	1.00468e+07
Belgium	2050	Western Europe	SSP3	60151.9	12107659	1.73861	0.979111	8.94067e+06
Belgium	2050	Western Europe	SSP4	67991.9	11802146	1.96522	1.07383	9.83301e+06
Belgium	2050	Western Europe	SSP5	73666.6	13264836	2.12924	1.14376	1.19792e+07
Belgium	2055	Western Europe	SSP1	71601.2	12459907	2.06954	1.11809	1.09324e+07
Belgium	2055	Western Europe	SSP2	68950.4	12444478	1.99292	1.08596	1.05191e+07
Belgium	2055	Western Europe	SSP3	60037	12193602	1.73529	0.977788	8.98801e+06
Belgium	2055	Western Europe	SSP4	70454.2	11756522	2.03639	1.10363	1.01452e+07
Belgium	2055	Western Europe	SSP5	79566.4	13527934	2.29976	1.21544	1.31864e+07
Belgium	2060	Western Europe	SSP1	75113.4	12507838	2.17106	1.16067	1.15071e+07
Belgium	2060	Western Europe	SSP2	71843.1	12529361	2.07653	1.12107	1.10308e+07
Belgium	2060	Western Europe	SSP3	59832	12294602	1.72937	0.975387	9.03293e+06
Belgium	2060	Western Europe	SSP4	73174.9	11680810	2.11503	1.13652	1.04642e+07
Belgium	2060	Western Europe	SSP5	86272.8	13750102	2.4936	1.29685	1.45225e+07
Belgium	2065	Western Europe	SSP1	78932.1	12524700	2.28143	1.20694	1.21022e+07
Belgium	2065	Western Europe	SSP2	74992.1	12600789	2.16755	1.15928	1.1575e+07
Belgium	2065	Western Europe	SSP3	59502.2	12421627	1.71983	0.971494	9.0779e+06
Belgium	2065	Western Europe	SSP4	76107.9	11578966	2.1998	1.17197	1.07834e+07
Belgium	2065	Western Europe	SSP5	93783.3	13925411	2.71069	1.38798	1.59766e+07
Belgium	2070	Western Europe	SSP1	82690.1	12526981	2.39005	1.25247	1.26746e+07
Belgium	2070	Western Europe	SSP2	78076.2	12667786	2.25669	1.19669	12110540
Belgium	2070	Western Europe	SSP3	58867.4	12582555	1.70149	0.963934	9.10039e+06
Belgium	2070	Western Europe	SSP4	78927.7	11457646	2.2813	1.20603	1.10606e+07
Belgium	2070	Western Europe	SSP5	101701	14069711	2.93954	1.484	1.74932e+07
Belgium	2075	Western Europe	SSP1	86272.4	12517168	2.49359	1.29585	1.32078e+07
Belgium	2075	Western Europe	SSP2	81033.4	12727955	2.34217	1.23256	1.26246e+07
Belgium	2075	Western Europe	SSP3	58004.1	12767844	1.67653	0.953626	9.10279e+06
Belgium	2075	Western Europe	SSP4	81549.5	11315258	2.35708	1.23767	1.12812e+07
Belgium	2075	Western Europe	SSP5	109899	14184200	3.17649	1.5834	1.90455e+07
Belgium	2080	Western Europe	SSP1	89705.2	12477884	2.59281	1.33741	1.36848e+07
Belgium	2080	Western Europe	SSP2	83910.5	12766700	2.42533	1.26745	1.31084e+07
Belgium	2080	Western Europe	SSP3	57027.1	12961303	1.6483	0.941948	9.08934e+06
Belgium	2080	Western Europe	SSP4	84007.2	11139737	2.42812	1.2673	1.14363e+07
Belgium	2080	Western Europe	SSP5	118414	14249801	3.4226	1.6866	2.06041e+07
Belgium	2085	Western Europe	SSP1	93119.6	12364666	2.6915	1.37868	1.40709e+07
Belgium	2085	Western Europe	SSP2	86790.8	12771939	2.50858	1.30234	1.35595e+07
Belgium	2085	Western Europe	SSP3	56023.6	13154842	1.61929	0.929948	9.06721e+06
Belgium	2085	Western Europe	SSP4	86374.8	10920831	2.49655	1.29581	1.15229e+07
Belgium	2085	Western Europe	SSP5	127405	14219954	3.68248	1.79549	2.21094e+07
Belgium	2090	Western Europe	SSP1	96618.1	12142974	2.79262	1.42088	1.43311e+07
Belgium	2090	Western Europe	SSP2	89716.1	12742309	2.59313	1.33775	1.39792e+07
Belgium	2090	Western Europe	SSP3	55010.4	13355050	1.59001	0.917836	9.04345e+06
Belgium	2090	Western Europe	SSP4	88701.2	10656778	2.56379	1.32377	1.15423e+07
Belgium	2090	Western Europe	SSP5	137023	14055272	3.96047	1.91187	2.3489e+07
Belgium	2095	Western Europe	SSP1	100123	11844059	2.89393	1.46309	1.44783e+07
Belgium	2095	Western Europe	SSP2	92645.7	12686045	2.67781	1.37319	1.43671e+07
Belgium	2095	Western Europe	SSP3	53947.5	13573880	1.55928	0.905137	9.01926e+06
Belgium	2095	Western Europe	SSP4	90970.4	10354424	2.62938	1.35102	1.14969e+07
Belgium	2095	Western Europe	SSP5	147192	13784557	4.2544	2.03483	2.47316e+07
Belgium	2100	Western Europe	SSP1	103555	11477641	2.99312	1.50437	1.45042e+07
Belgium	2100	Western Europe	SSP2	95495.3	12607799	2.76017	1.40765	1.47129e+07
Belgium	2100	Western Europe	SSP3	52790.8	13812268	1.52585	0.891318	8.98678e+06
Belgium	2100	Western Europe	SSP4	93132.6	10019501	2.69188	1.37694	1.13848e+07
Belgium	2100	Western Europe	SSP5	157833	13412784	4.56196	2.16343	2.57895e+07
Bosnia and Herzegovina	2003	Central and Eastern Europe	Historical	7618.83	4183757	0.01826	0.309	1.29278e+06
Bosnia and Herzegovina	2004	Central and Eastern Europe	Historical	8180.71	4142860	0.0159	0.37898	1.57006e+06
Bosnia and Herzegovina	2005	Central and Eastern Europe	Historical	8600.34	4094297	0.02697	0.40189	1.64546e+06
Bosnia and Herzegovina	2008	Central and Eastern Europe	Historical	10506.7	3943392	0.01842	0.4509	1.77808e+06
Bosnia and Herzegovina	2010	Central and Eastern Europe	Historical	10636.1	3811088	0.26533	0.46978	1.79037e+06
Bosnia and Herzegovina	2012	Central and Eastern Europe	Historical	11046.2	3674374	0.26533	0.53279	1.95767e+06
Bosnia and Herzegovina	2014	Central and Eastern Europe	Historical	11767	3571068	0.25725	0.47069	1.68087e+06
Bosnia and Herzegovina	2016	Central and Eastern Europe	Historical	13000.7	3480986	0.21337	0.51183	1.78167e+06
Bosnia and Herzegovina	2018	Central and Eastern Europe	Historical	14267.6	3400129	0.19199	0.5303	1.80309e+06
Bosnia and Herzegovina	2020	Central and Eastern Europe	Historical	14587.6	3318407	0.20325	0.6372	2.11449e+06
Bosnia and Herzegovina	2020	Central and Eastern Europe	SSP1	14582.4	3340977	0.421486	0.6372	599180
Bosnia and Herzegovina	2020	Central and Eastern Europe	SSP2	14582.4	3340977	0.421486	0.6372	599180
Bosnia and Herzegovina	2020	Central and Eastern Europe	SSP3	14582.4	3340977	0.421486	0.6372	599180
Bosnia and Herzegovina	2020	Central and Eastern Europe	SSP4	14582.4	3340977	0.421486	0.6372	599180
Bosnia and Herzegovina	2020	Central and Eastern Europe	SSP5	14582.4	3340977	0.421486	0.6372	599180
Bosnia and Herzegovina	2025	Central and Eastern Europe	SSP1	18517.5	3183021	0.535225	0.684741	722174
Bosnia and Herzegovina	2025	Central and Eastern Europe	SSP2	18530.4	3180792	0.535597	0.684895	722160
Bosnia and Herzegovina	2025	Central and Eastern Europe	SSP3	18277.8	3224754	0.528296	0.681871	722388
Bosnia and Herzegovina	2025	Central and Eastern Europe	SSP4	18568.7	3174226	0.536704	0.685354	722125
Bosnia and Herzegovina	2025	Central and Eastern Europe	SSP5	19008	3100872	0.549402	0.690616	721755
Bosnia and Herzegovina	2030	Central and Eastern Europe	SSP1	22338	3071102	0.645651	0.73093	838635
Bosnia and Herzegovina	2030	Central and Eastern Europe	SSP2	22355.7	3062876	0.646163	0.731138	837025
Bosnia and Herzegovina	2030	Central and Eastern Europe	SSP3	21723.3	3145238	0.627884	0.723544	835647
Bosnia and Herzegovina	2030	Central and Eastern Europe	SSP4	22501	3045065	0.650363	0.732884	837473
Bosnia and Herzegovina	2030	Central and Eastern Europe	SSP5	23589.3	2917146	0.681818	0.745964	840448
Bosnia and Herzegovina	2035	Central and Eastern Europe	SSP1	26413.8	2951690	0.763457	0.780207	951475
Bosnia and Herzegovina	2035	Central and Eastern Europe	SSP2	26072.4	2936945	0.753589	0.776059	934541
Bosnia and Herzegovina	2035	Central and Eastern Europe	SSP3	24559.3	3056556	0.709855	0.757827	916872
Bosnia and Herzegovina	2035	Central and Eastern Europe	SSP4	26496	2903849	0.765833	0.781164	938832
Bosnia and Herzegovina	2035	Central and Eastern Europe	SSP5	29199.2	2738362	0.843965	0.813775	974633
Bosnia and Herzegovina	2040	Central and Eastern Europe	SSP1	30087.6	2827325	0.869643	0.824609	1.03693e+06
Bosnia and Herzegovina	2040	Central and Eastern Europe	SSP2	29194.1	2806279	0.843818	0.813769	998786
Bosnia and Herzegovina	2040	Central and Eastern Europe	SSP3	26478	2961182	0.765313	0.780992	956860
Bosnia and Herzegovina	2040	Central and Eastern Europe	SSP4	29946.7	2754265	0.865571	0.822843	1.00527e+06
Bosnia and Herzegovina	2040	Central and Eastern Europe	SSP5	34794.7	2568224	1.0057	0.88142	1.0878e+06
Bosnia and Herzegovina	2045	Central and Eastern Europe	SSP1	33223.6	2703369	0.960286	0.862497	1.09389e+06
Bosnia and Herzegovina	2045	Central and Eastern Europe	SSP2	31877.3	2676242	0.921372	0.846167	1.03921e+06
Bosnia and Herzegovina	2045	Central and Eastern Europe	SSP3	27897.2	2861216	0.806333	0.798103	973516
Bosnia and Herzegovina	2045	Central and Eastern Europe	SSP4	32860.7	2605884	0.949796	0.858022	1.04278e+06
Bosnia and Herzegovina	2045	Central and Eastern Europe	SSP5	39723.1	2411457	1.14815	0.940994	1.16506e+06
Bosnia and Herzegovina	2050	Central and Eastern Europe	SSP1	35834.7	2581805	1.03576	0.894029	1.12611e+06
Bosnia and Herzegovina	2050	Central and Eastern Europe	SSP2	34263.2	2551093	0.990334	0.874968	1.06409e+06
Bosnia and Herzegovina	2050	Central and Eastern Europe	SSP3	29073.3	2763769	0.840326	0.812271	979517
Bosnia and Herzegovina	2050	Central and Eastern Europe	SSP4	35319	2462513	1.02085	0.887686	1.05846e+06
Bosnia and Herzegovina	2050	Central and Eastern Europe	SSP5	43872.8	2268667	1.26809	0.991146	1.20986e+06
Bosnia and Herzegovina	2055	Central and Eastern Europe	SSP1	38164.8	2463330	1.1031	0.922159	1.14373e+06
Bosnia and Herzegovina	2055	Central and Eastern Europe	SSP2	36480.5	2433531	1.05442	0.901732	1.08018e+06
Bosnia and Herzegovina	2055	Central and Eastern Europe	SSP3	30077	2674863	0.869337	0.824358	980338
Bosnia and Herzegovina	2055	Central and Eastern Europe	SSP4	37493.5	2326513	1.0837	0.913917	1.06103e+06
Bosnia and Herzegovina	2055	Central and Eastern Europe	SSP5	47738.4	2138795	1.37982	1.03787	1.24052e+06
Bosnia and Herzegovina	2060	Central and Eastern Europe	SSP1	40478.9	2346922	1.16999	0.950097	1.15525e+06
Bosnia and Herzegovina	2060	Central and Eastern Europe	SSP2	38672.9	2323629	1.11779	0.928201	1.0929e+06
Bosnia and Herzegovina	2060	Central and Eastern Europe	SSP3	30925.8	2596422	0.893871	0.834576	978121
Bosnia and Herzegovina	2060	Central and Eastern Europe	SSP4	39601	2198192	1.14462	0.939343	1.0584e+06
Bosnia and Herzegovina	2060	Central and Eastern Europe	SSP5	51775.2	2019242	1.4965	1.08667	1.26973e+06
Bosnia and Herzegovina	2065	Central and Eastern Europe	SSP1	42856.7	2236962	1.23872	0.978812	1.16536e+06
Bosnia and Herzegovina	2065	Central and Eastern Europe	SSP2	40882.8	2223739	1.18166	0.95489	1.10527e+06
Bosnia and Herzegovina	2065	Central and Eastern Europe	SSP3	31626.5	2528466	0.914123	0.843009	973844
Bosnia and Herzegovina	2065	Central and Eastern Europe	SSP4	41703.4	2080324	1.20538	0.964715	1.05443e+06
Bosnia and Herzegovina	2065	Central and Eastern Europe	SSP5	56119.5	1913289	1.62206	1.13921	1.30363e+06
Bosnia and Herzegovina	2070	Central and Eastern Europe	SSP1	45088.5	2133749	1.30323	1.00576	1.1691e+06
Bosnia and Herzegovina	2070	Central and Eastern Europe	SSP2	42936.3	2132193	1.24102	0.979692	1.11265e+06
Bosnia and Herzegovina	2070	Central and Eastern Europe	SSP3	32072	2469843	0.927	0.848359	964477
Bosnia and Herzegovina	2070	Central and Eastern Europe	SSP4	43620.8	1971016	1.2608	0.987853	1.04463e+06
Bosnia and Herzegovina	2070	Central and Eastern Europe	SSP5	60506	1819091	1.74885	1.19227	1.33597e+06
Bosnia and Herzegovina	2075	Central and Eastern Europe	SSP1	47283	2037075	1.36665	1.03227	1.17012e+06
Bosnia and Herzegovina	2075	Central and Eastern Europe	SSP2	44950.4	2047539	1.29923	1.00402	1.11829e+06
Bosnia and Herzegovina	2075	Central and Eastern Europe	SSP3	32376.1	2420606	0.93579	0.852003	954070
Bosnia and Herzegovina	2075	Central and Eastern Europe	SSP4	45481	1868601	1.31457	1.0103	1.0323e+06
Bosnia and Herzegovina	2075	Central and Eastern Europe	SSP5	65050	1734626	1.88019	1.24725	1.3693e+06
Bosnia and Herzegovina	2080	Central and Eastern Europe	SSP1	49401.1	1946128	1.42788	1.05785	1.16767e+06
Bosnia and Herzegovina	2080	Central and Eastern Europe	SSP2	46896.6	1970099	1.35549	1.02753	1.12232e+06
Bosnia and Herzegovina	2080	Central and Eastern Europe	SSP3	32527.1	2381873	0.940154	0.853801	943086
Bosnia and Herzegovina	2080	Central and Eastern Europe	SSP4	47258	1773282	1.36593	1.03175	1.01768e+06
Bosnia and Herzegovina	2080	Central and Eastern Europe	SSP5	69733.5	1657544	2.01556	1.30392	1.40238e+06
Bosnia and Herzegovina	2085	Central and Eastern Europe	SSP1	51498.4	1859837	1.4885	1.08319	1.16302e+06
Bosnia and Herzegovina	2085	Central and Eastern Europe	SSP2	48835.3	1899557	1.41152	1.05096	1.12664e+06
Bosnia and Herzegovina	2085	Central and Eastern Europe	SSP3	32557	2354338	0.941018	0.85414	932984
Bosnia and Herzegovina	2085	Central and Eastern Europe	SSP4	49016.5	1684502	1.41676	1.05298	1.00249e+06
Bosnia and Herzegovina	2085	Central and Eastern Europe	SSP5	74660.3	1585495	2.15796	1.36354	1.43596e+06
Bosnia and Herzegovina	2090	Central and Eastern Europe	SSP1	53640.5	1777594	1.55041	1.10907	1.15759e+06
Bosnia and Herzegovina	2090	Central and Eastern Europe	SSP2	50837.3	1835761	1.46939	1.07516	1.13322e+06
Bosnia and Herzegovina	2090	Central and Eastern Europe	SSP3	32498.1	2337457	0.939316	0.853413	924595
Bosnia and Herzegovina	2090	Central and Eastern Europe	SSP4	50823.4	1601918	1.46899	1.0748	988299
Bosnia and Herzegovina	2090	Central and Eastern Europe	SSP5	79960.3	1516778	2.31115	1.42769	1.47102e+06
Bosnia and Herzegovina	2095	Central and Eastern Europe	SSP1	55874.6	1698880	1.61498	1.13607	1.1522e+06
Bosnia and Herzegovina	2095	Central and Eastern Europe	SSP2	52965.5	1777366	1.5309	1.10089	1.14291e+06
Bosnia and Herzegovina	2095	Central and Eastern Europe	SSP3	32388	2329063	0.936134	0.852073	918153
Bosnia and Herzegovina	2095	Central and Eastern Europe	SSP4	52741	1523996	1.52441	1.09797	975530
Bosnia and Herzegovina	2095	Central and Eastern Europe	SSP5	85731.3	1450149	2.47795	1.49754	1.5077e+06
Bosnia and Herzegovina	2100	Central and Eastern Europe	SSP1	58218.7	1622426	1.68274	1.16441	1.14632e+06
Bosnia and Herzegovina	2100	Central and Eastern Europe	SSP2	55257.1	1722536	1.59714	1.12861	1.1554e+06
Bosnia and Herzegovina	2100	Central and Eastern Europe	SSP3	32261.1	2326498	0.932466	0.850534	913560
Bosnia and Herzegovina	2100	Central and Eastern Europe	SSP4	54812.1	1448533	1.58427	1.123	963479
Bosnia and Herzegovina	2100	Central and Eastern Europe	SSP5	92032.1	1383938	2.66007	1.57381	1.54442e+06
Brazil	2003	Latin America and the Caribbean	Historical	11700	182629278	0.99939	0.52673	9.61963e+07
Brazil	2004	Latin America and the Caribbean	Historical	12300	184722043	0.96343	0.56746	1.04822e+08
Brazil	2005	Latin America and the Caribbean	Historical	12500	186797334	1.00246	0.59811	1.11725e+08
Brazil	2008	Latin America and the Caribbean	Historical	14067.9	192672317	1.12904	0.5679	1.09419e+08
Brazil	2010	Latin America and the Caribbean	Historical	14824.7	196353492	1.15992	0.50058	9.82906e+07
Brazil	2012	Latin America and the Caribbean	Historical	15425.4	199977707	1.12684	0.61673	1.23332e+08
Brazil	2014	Latin America and the Caribbean	Historical	15695.6	203459650	1.26971	0.60082	1.22243e+08
Brazil	2016	Latin America and the Caribbean	Historical	14402.5	206859578	1.28637	0.63769	1.31912e+08
Brazil	2018	Latin America and the Caribbean	Historical	14619.6	210166592	1.16769	0.7327	153989062
Brazil	2020	Latin America and the Caribbean	Historical	14109.8	213196304	1.14526	0.7677	1.63671e+08
Brazil	2020	Latin America and the Caribbean	SSP1	13811.4	212564938	0.399201	0.7677	7.20422e+07
Brazil	2020	Latin America and the Caribbean	SSP2	13811.4	212564938	0.399201	0.7677	7.20422e+07
Brazil	2020	Latin America and the Caribbean	SSP3	13811.4	212564938	0.399201	0.7677	7.20422e+07
Brazil	2020	Latin America and the Caribbean	SSP4	13811.4	212564938	0.399201	0.7677	7.20422e+07
Brazil	2020	Latin America and the Caribbean	SSP5	13811.4	212564938	0.399201	0.7677	7.20422e+07
Brazil	2025	Latin America and the Caribbean	SSP1	15713.2	217004168	0.45417	0.794322	7.93237e+07
Brazil	2025	Latin America and the Caribbean	SSP2	15672.9	217561951	0.453005	0.794284	7.95194e+07
Brazil	2025	Latin America and the Caribbean	SSP3	15637.1	218060224	0.45197	0.794252	79694675
Brazil	2025	Latin America and the Caribbean	SSP4	15632.1	218130479	0.451826	0.794249	7.97195e+07
Brazil	2025	Latin America and the Caribbean	SSP5	15715.6	216971074	0.454239	0.794324	7.93122e+07
Brazil	2030	Latin America and the Caribbean	SSP1	16811.5	220666210	0.485915	0.810583	8.42506e+07
Brazil	2030	Latin America and the Caribbean	SSP2	16679.3	222220668	0.482094	0.810236	8.47671e+07
Brazil	2030	Latin America and the Caribbean	SSP3	16553.7	223703851	0.478463	0.809912	8.52604e+07
Brazil	2030	Latin America and the Caribbean	SSP4	16556.6	223930521	0.478547	0.81013	8.53956e+07
Brazil	2030	Latin America and the Caribbean	SSP5	16840.5	220600426	0.486753	0.810881	8.42913e+07
Brazil	2035	Latin America and the Caribbean	SSP1	19111	222826934	0.552379	0.840182	9.16712e+07
Brazil	2035	Latin America and the Caribbean	SSP2	18683.1	225602922	0.540011	0.83724	9.21494e+07
Brazil	2035	Latin America and the Caribbean	SSP3	18211.7	228460027	0.526386	0.833836	9.25388e+07
Brazil	2035	Latin America and the Caribbean	SSP4	18481.8	228830662	0.534193	0.837407	9.35061e+07
Brazil	2035	Latin America and the Caribbean	SSP5	19476.1	222731264	0.562932	0.844528	9.25997e+07
Brazil	2040	Latin America and the Caribbean	SSP1	22483	223453514	0.649842	0.881535	1.01169e+08
Brazil	2040	Latin America and the Caribbean	SSP2	21440.8	227643791	0.619719	0.872293	1.00963e+08
Brazil	2040	Latin America and the Caribbean	SSP3	20233.4	232194019	0.58482	0.861341	1.00438e+08
Brazil	2040	Latin America and the Caribbean	SSP4	21258.7	232657598	0.614455	0.874135	1.03615e+08
Brazil	2040	Latin America and the Caribbean	SSP5	23748.1	223332975	0.686408	0.896763	1.04516e+08
Brazil	2045	Latin America and the Caribbean	SSP1	26896.5	222956295	0.777409	0.934597	1.12775e+08
Brazil	2045	Latin America and the Caribbean	SSP2	24923.5	228382237	0.720382	0.915077	1.11061e+08
Brazil	2045	Latin America and the Caribbean	SSP3	22494.3	234517983	0.650169	0.890605	1.08306e+08
Brazil	2045	Latin America and the Caribbean	SSP4	24949.9	235009350	0.721145	0.920748	115616656
Brazil	2045	Latin America and the Caribbean	SSP5	29676.9	222817264	0.857773	0.968165	1.20184e+08
Brazil	2050	Latin America and the Caribbean	SSP1	32104.9	221235261	0.927951	0.9963	1.25555e+08
Brazil	2050	Latin America and the Caribbean	SSP2	29073.1	227813371	0.840321	0.964885	1.22132e+08
Brazil	2050	Latin America and the Caribbean	SSP3	24917.9	235638341	0.72022	0.920868	1.15954e+08
Brazil	2050	Latin America and the Caribbean	SSP4	29433.2	236161616	0.850729	0.975987	1.29229e+08
Brazil	2050	Latin America and the Caribbean	SSP5	36842	221085139	1.06487	1.05356	1.3813e+08
Brazil	2055	Latin America and the Caribbean	SSP1	37992.7	218385801	1.09813	1.06532	139011406
Brazil	2055	Latin America and the Caribbean	SSP2	33843.9	226154079	0.978215	1.02134	1.34009e+08
Brazil	2055	Latin America and the Caribbean	SSP3	27418.1	235910374	0.792485	0.951374	1.23285e+08
Brazil	2055	Latin America and the Caribbean	SSP4	34629.4	236474727	1.00092	1.03918	1.44345e+08
Brazil	2055	Latin America and the Caribbean	SSP5	45191	218232602	1.30619	1.1524	1.57916e+08
Brazil	2060	Latin America and the Caribbean	SSP1	44512.1	214408676	1.28657	1.14108	1.52724e+08
Brazil	2060	Latin America and the Caribbean	SSP2	39174.6	223527486	1.13229	1.08379	1.46412e+08
Brazil	2060	Latin America and the Caribbean	SSP3	29852.7	235577465	0.862854	0.980597	1.29995e+08
Brazil	2060	Latin America and the Caribbean	SSP4	40401.4	236192918	1.16775	1.10888	160633615
Brazil	2060	Latin America and the Caribbean	SSP5	54787.9	214260521	1.58357	1.26544	1.79263e+08
Brazil	2065	Latin America and the Caribbean	SSP1	51716.2	209456828	1.49479	1.22435	1.66638e+08
Brazil	2065	Latin America and the Caribbean	SSP2	45138.2	219986810	1.30466	1.15317	1.59356e+08
Brazil	2065	Latin America and the Caribbean	SSP3	32247.5	234599377	0.932073	1.00882	1.36076e+08
Brazil	2065	Latin America and the Caribbean	SSP4	46805	235259008	1.35284	1.18569	1.7807e+08
Brazil	2065	Latin America and the Caribbean	SSP5	65808.1	209321724	1.9021	1.39495	2.0224e+08
Brazil	2070	Latin America and the Caribbean	SSP1	59404.4	203632518	1.71701	1.31278	1.80012e+08
Brazil	2070	Latin America and the Caribbean	SSP2	51624.8	215662394	1.49215	1.22826	1.72417e+08
Brazil	2070	Latin America and the Caribbean	SSP3	34538.7	233130583	0.998297	1.03539	1.41418e+08
Brazil	2070	Latin America and the Caribbean	SSP4	53744.4	233811241	1.55341	1.26859	1.96356e+08
Brazil	2070	Latin America and the Caribbean	SSP5	78090.4	203517556	2.2571	1.53905	2.25958e+08
Brazil	2075	Latin America and the Caribbean	SSP1	67543.2	197112977	1.95225	1.40611	1.92644e+08
Brazil	2075	Latin America and the Caribbean	SSP2	58676.4	210670582	1.69597	1.30965	1.85572e+08
Brazil	2075	Latin America and the Caribbean	SSP3	36781	231315828	1.06311	1.06108	1.46261e+08
Brazil	2075	Latin America and the Caribbean	SSP4	61281.8	231989511	1.77127	1.35842	2.15666e+08
Brazil	2075	Latin America and the Caribbean	SSP5	91673.2	197024171	2.6497	1.69834	2.50134e+08
Brazil	2080	Latin America and the Caribbean	SSP1	75948.1	190087151	2.19518	1.50225	2.04053e+08
Brazil	2080	Latin America and the Caribbean	SSP2	66213.5	205115032	1.91382	1.39646	1.98486e+08
Brazil	2080	Latin America and the Caribbean	SSP3	38951.2	229396208	1.12583	1.08582	1.50723e+08
Brazil	2080	Latin America and the Caribbean	SSP4	69352.3	230048197	2.00454	1.45462	2.35991e+08
Brazil	2080	Latin America and the Caribbean	SSP5	106389	190029032	3.07504	1.87095	2.74055e+08
Brazil	2085	Latin America and the Caribbean	SSP1	84550.9	182717642	2.44384	1.60051	2.14096e+08
Brazil	2085	Latin America and the Caribbean	SSP2	74225.3	199309975	2.14539	1.48883	2.11278e+08
Brazil	2085	Latin America and the Caribbean	SSP3	41067.6	227641723	1.18701	1.11004	1.55083e+08
Brazil	2085	Latin America and the Caribbean	SSP4	77948.2	228270439	2.25299	1.55731	2.57609e+08
Brazil	2085	Latin America and the Caribbean	SSP5	122214	182692603	3.53244	2.05673	2.97414e+08
Brazil	2090	Latin America and the Caribbean	SSP1	93308.8	175136496	2.69697	1.70048	2.22721e+08
Brazil	2090	Latin America and the Caribbean	SSP2	82703.1	193427095	2.39043	1.58678	2.23987e+08
Brazil	2090	Latin America and the Caribbean	SSP3	43127.2	226329013	1.24654	1.13393	1.59596e+08
Brazil	2090	Latin America and the Caribbean	SSP4	87023.7	226932648	2.51531	1.66616	2.80802e+08
Brazil	2090	Latin America and the Caribbean	SSP5	139155	175144858	4.0221	2.25585	3.20002e+08
Brazil	2095	Latin America and the Caribbean	SSP1	102183	167257922	2.95347	1.80162	2.29618e+08
Brazil	2095	Latin America and the Caribbean	SSP2	91623.3	187625721	2.64825	1.69015	2.36665e+08
Brazil	2095	Latin America and the Caribbean	SSP3	45134.3	225570420	1.30455	1.15763	1.64407e+08
Brazil	2095	Latin America and the Caribbean	SSP4	96553.7	226132067	2.79076	1.78096	3.05771e+08
Brazil	2095	Latin America and the Caribbean	SSP5	157228	167298578	4.54447	2.46845	341232855
Brazil	2100	Latin America and the Caribbean	SSP1	111148	158863183	3.21259	1.90344	2.34269e+08
Brazil	2100	Latin America and the Caribbean	SSP2	100956	182011177	2.918	1.79867	2.49335e+08
Brazil	2100	Latin America and the Caribbean	SSP3	47106.6	225386571	1.36156	1.18138	1.69625e+08
Brazil	2100	Latin America and the Caribbean	SSP4	106547	225877622	3.0796	1.90181	332724073
Brazil	2100	Latin America and the Caribbean	SSP5	176459	158935520	5.10032	2.69465	3.60127e+08
Bulgaria	2003	Central and Eastern Europe	Historical	12768.7	7775327	0.47222	0.54801	4.26096e+06
Bulgaria	2004	Central and Eastern Europe	Historical	13700	7716860	0.47086	0.54172	4.18038e+06
Bulgaria	2005	Central and Eastern Europe	Historical	14800	7658972	0.44269	0.56047	4.29262e+06
Bulgaria	2008	Central and Eastern Europe	Historical	18265.7	7492561	0.44731	0.5719	4.285e+06
Bulgaria	2010	Central and Eastern Europe	Historical	18164.1	7395599	0.56307	0.55902	4.13429e+06
Bulgaria	2012	Central and Eastern Europe	Historical	18912	7305888	0.60036	0.61315	4.47961e+06
Bulgaria	2014	Central and Eastern Europe	Historical	19203.3	7223938	0.79005	0.54209	3.91602e+06
Bulgaria	2016	Central and Eastern Europe	Historical	20732.6	7127822	0.76976	0.63764	4.54498e+06
Bulgaria	2018	Central and Eastern Europe	Historical	22196	7025037	0.75379	0.7177	5.04187e+06
Bulgaria	2020	Central and Eastern Europe	Historical	22466.9	6934015	0.84924	0.798	5.53334e+06
Bulgaria	2020	Central and Eastern Europe	SSP1	22273.4	7020239	0.643784	0.798	1.93393e+06
Bulgaria	2020	Central and Eastern Europe	SSP2	22273.4	7020239	0.643784	0.798	1.93393e+06
Bulgaria	2020	Central and Eastern Europe	SSP3	22273.4	7020239	0.643784	0.798	1.93393e+06
Bulgaria	2020	Central and Eastern Europe	SSP4	22273.4	7020239	0.643784	0.798	1.93393e+06
Bulgaria	2020	Central and Eastern Europe	SSP5	22273.4	7020239	0.643784	0.798	1.93393e+06
Bulgaria	2025	Central and Eastern Europe	SSP1	28104	6686460	0.81231	0.86836	2.31244e+06
Bulgaria	2025	Central and Eastern Europe	SSP2	28139.5	6678009	0.813336	0.868783	2.31234e+06
Bulgaria	2025	Central and Eastern Europe	SSP3	28084.3	6691161	0.811741	0.868125	2.31249e+06
Bulgaria	2025	Central and Eastern Europe	SSP4	28194.8	6664925	0.814935	0.869443	2.3122e+06
Bulgaria	2025	Central and Eastern Europe	SSP5	28221.6	6658599	0.815709	0.869762	2.31214e+06
Bulgaria	2030	Central and Eastern Europe	SSP1	33492.8	6446077	0.968066	0.933444	2.64884e+06
Bulgaria	2030	Central and Eastern Europe	SSP2	33542.3	6423876	0.969497	0.934025	2.64345e+06
Bulgaria	2030	Central and Eastern Europe	SSP3	33326.2	6448279	0.963251	0.931427	2.63674e+06
Bulgaria	2030	Central and Eastern Europe	SSP4	33756.4	6387395	0.975685	0.936589	2.64482e+06
Bulgaria	2030	Central and Eastern Europe	SSP5	33855.1	6395875	0.978538	0.937792	2.65602e+06
Bulgaria	2035	Central and Eastern Europe	SSP1	39331.9	6219932	1.13684	1.00399	2.99473e+06
Bulgaria	2035	Central and Eastern Europe	SSP2	38748.3	6182871	1.11997	0.996894	2.93299e+06
Bulgaria	2035	Central and Eastern Europe	SSP3	37484.7	6220115	1.08345	0.981618	2.85563e+06
Bulgaria	2035	Central and Eastern Europe	SSP4	39421.9	6111867	1.13944	1.005	2.94883e+06
Bulgaria	2035	Central and Eastern Europe	SSP5	40935.8	6153455	1.1832	1.02337	3.08194e+06
Bulgaria	2040	Central and Eastern Europe	SSP1	45378.1	6006775	1.3116	1.07706	3.33101e+06
Bulgaria	2040	Central and Eastern Europe	SSP2	43588.4	5957062	1.25987	1.05534	3.17405e+06
Bulgaria	2040	Central and Eastern Europe	SSP3	40409.7	6014047	1.16799	1.01688	2.97312e+06
Bulgaria	2040	Central and Eastern Europe	SSP4	44937.9	5839615	1.29887	1.0716	3.20638e+06
Bulgaria	2040	Central and Eastern Europe	SSP5	49131.8	5929876	1.42009	1.12247	3.55763e+06
Bulgaria	2045	Central and Eastern Europe	SSP1	51338.5	5809888	1.48387	1.14911	3.64039e+06
Bulgaria	2045	Central and Eastern Europe	SSP2	48204	5747942	1.39327	1.11109	3.38303e+06
Bulgaria	2045	Central and Eastern Europe	SSP3	42549.3	5825379	1.22983	1.04265	3.02994e+06
Bulgaria	2045	Central and Eastern Europe	SSP4	50230.1	5581701	1.45184	1.13549	3.42143e+06
Bulgaria	2045	Central and Eastern Europe	SSP5	57590.9	5727820	1.66459	1.22478	4.0224e+06
Bulgaria	2050	Central and Eastern Europe	SSP1	56948.6	5629558	1.64603	1.21692	3.90915e+06
Bulgaria	2050	Central and Eastern Europe	SSP2	52754.1	5558138	1.52479	1.16605	3.57682e+06
Bulgaria	2050	Central and Eastern Europe	SSP3	44399.2	5659495	1.2833	1.06492	3.06973e+06
Bulgaria	2050	Central and Eastern Europe	SSP4	55268.4	5339505	1.59746	1.19633	3.59781e+06
Bulgaria	2050	Central and Eastern Europe	SSP5	65682.3	5547043	1.89846	1.32265	4.43834e+06
Bulgaria	2055	Central and Eastern Europe	SSP1	62502.4	5456254	1.80655	1.28406	4.15512e+06
Bulgaria	2055	Central and Eastern Europe	SSP2	57455.8	5380608	1.66069	1.22286	3.76826e+06
Bulgaria	2055	Central and Eastern Europe	SSP3	46189.3	5511575	1.33504	1.08649	3.10835e+06
Bulgaria	2055	Central and Eastern Europe	SSP4	60268.6	5106364	1.74199	1.25671	3.74905e+06
Bulgaria	2055	Central and Eastern Europe	SSP5	73969.7	5377063	2.138	1.4229	4.8414e+06
Bulgaria	2060	Central and Eastern Europe	SSP1	68146.3	5281294	1.96968	1.35228	4.38221e+06
Bulgaria	2060	Central and Eastern Europe	SSP2	62311.1	5209718	1.80102	1.28154	3.95427e+06
Bulgaria	2060	Central and Eastern Europe	SSP3	47826.9	5379218	1.38238	1.10622	3.13984e+06
Bulgaria	2060	Central and Eastern Europe	SSP4	65321	4876176	1.88802	1.31773	3.87758e+06
Bulgaria	2060	Central and Eastern Europe	SSP5	82815.1	5208843	2.39366	1.52992	5.24736e+06
Bulgaria	2065	Central and Eastern Europe	SSP1	73914.7	5103555	2.13641	1.42201	4.59061e+06
Bulgaria	2065	Central and Eastern Europe	SSP2	67301	5042848	1.94525	1.34185	4.13175e+06
Bulgaria	2065	Central and Eastern Europe	SSP3	49275.5	5260733	1.42425	1.12367	3.16249e+06
Bulgaria	2065	Central and Eastern Europe	SSP4	70431.4	4647700	2.03573	1.37945	3.98275e+06
Bulgaria	2065	Central and Eastern Europe	SSP5	92353.8	5040247	2.66937	1.64533	5.65922e+06
Bulgaria	2070	Central and Eastern Europe	SSP1	79717.1	4925013	2.30412	1.49216	4.77547e+06
Bulgaria	2070	Central and Eastern Europe	SSP2	72320.5	4881818	2.09033	1.40252	4.29601e+06
Bulgaria	2070	Central and Eastern Europe	SSP3	50455.6	5162129	1.45835	1.13789	3.1766e+06
Bulgaria	2070	Central and Eastern Europe	SSP4	75511.4	4421969	2.18256	1.44081	4.06063e+06
Bulgaria	2070	Central and Eastern Europe	SSP5	102539	4872346	2.96376	1.76857	6.07119e+06
Bulgaria	2075	Central and Eastern Europe	SSP1	85579.7	4750470	2.47357	1.56303	4.94293e+06
Bulgaria	2075	Central and Eastern Europe	SSP2	77395.7	4729388	2.23702	1.46388	4.45205e+06
Bulgaria	2075	Central and Eastern Europe	SSP3	51414.5	5090093	1.48607	1.14945	3.1911e+06
Bulgaria	2075	Central and Eastern Europe	SSP4	80586.6	4201840	2.32925	1.50211	4.11606e+06
Bulgaria	2075	Central and Eastern Europe	SSP5	113441	4708843	3.27887	1.9005	6.48869e+06
Bulgaria	2080	Central and Eastern Europe	SSP1	91536.4	4585984	2.64574	1.63506	5.10208e+06
Bulgaria	2080	Central and Eastern Europe	SSP2	82559.1	4592736	2.38626	1.52632	4.61017e+06
Bulgaria	2080	Central and Eastern Europe	SSP3	52210.3	5047566	1.50907	1.15905	3.21293e+06
Bulgaria	2080	Central and Eastern Europe	SSP4	85695.4	3994791	2.47692	1.56383	4.15979e+06
Bulgaria	2080	Central and Eastern Europe	SSP5	125137	4554564	3.61692	2.04206	6.92082e+06
Bulgaria	2085	Central and Eastern Europe	SSP1	97624.3	4434116	2.82171	1.70868	5.25958e+06
Bulgaria	2085	Central and Eastern Europe	SSP2	87866.6	4473836	2.53967	1.59051	4.77802e+06
Bulgaria	2085	Central and Eastern Europe	SSP3	52903.2	5033421	1.5291	1.16743	3.24611e+06
Bulgaria	2085	Central and Eastern Europe	SSP4	90881.3	3803288	2.62681	1.62649	4.19872e+06
Bulgaria	2085	Central and Eastern Europe	SSP5	137731	4411051	3.98094	2.1945	7.37518e+06
Bulgaria	2090	Central and Eastern Europe	SSP1	103918	4294640	3.00362	1.78481	5.42107e+06
Bulgaria	2090	Central and Eastern Europe	SSP2	93401.5	4373131	2.69965	1.65748	4.96332e+06
Bulgaria	2090	Central and Eastern Europe	SSP3	53556.2	5041219	1.54797	1.17535	3.29105e+06
Bulgaria	2090	Central and Eastern Europe	SSP4	96207	3628482	2.78074	1.69086	4.23931e+06
Bulgaria	2090	Central and Eastern Europe	SSP5	151395	4277158	4.37588	2.35991	7.85881e+06
Bulgaria	2095	Central and Eastern Europe	SSP1	110498	4163841	3.1938	1.86441	5.58742e+06
Bulgaria	2095	Central and Eastern Europe	SSP2	99265.6	4284543	2.86914	1.72844	5.16683e+06
Bulgaria	2095	Central and Eastern Europe	SSP3	54213.8	5059982	1.56698	1.18333	3.34368e+06
Bulgaria	2095	Central and Eastern Europe	SSP4	101774	3465189	2.94165	1.75817	4.28175e+06
Bulgaria	2095	Central and Eastern Europe	SSP5	166327	4148460	4.80747	2.54069	8.37229e+06
Bulgaria	2100	Central and Eastern Europe	SSP1	117491	4029824	3.39593	1.94901	5.74851e+06
Bulgaria	2100	Central and Eastern Europe	SSP2	105569	4196335	3.05134	1.80473	5.38057e+06
Bulgaria	2100	Central and Eastern Europe	SSP3	54894.2	5081601	1.58665	1.19159	3.39994e+06
Bulgaria	2100	Central and Eastern Europe	SSP4	107714	3302563	3.11334	1.82999	4.318e+06
Bulgaria	2100	Central and Eastern Europe	SSP5	182818	4012528	5.28412	2.74034	8.89908e+06
Canada	2003	North America	Historical	42800	31644028	1.96781	0.80644	2.5519e+07
Canada	2004	North America	Historical	43700	31940655	1.99734	0.83687	2.67302e+07
Canada	2005	North America	Historical	44700	32243753	1.97127	0.84251	2.71657e+07
Canada	2008	North America	Historical	45842	33247118	1.85578	0.8172	2.71695e+07
Canada	2010	North America	Historical	44858.8	34004889	1.82528	0.84479	2.8727e+07
Canada	2012	North America	Historical	46116.4	34714222	1.77232	0.84299	29263742
Canada	2014	North America	Historical	47554.3	35437435	1.71417	0.84177	2.98302e+07
Canada	2016	North America	Historical	47460.4	36109487	1.72903	0.82847	2.99156e+07
Canada	2018	North America	Historical	48946.2	37065084	1.7372	0.8258	3.06083e+07
Canada	2020	North America	Historical	46193.2	38007166	1.89484	0.842	3.2002e+07
Canada	2020	North America	SSP1	43696.3	37758236	1.26299	0.842	2.11372e+07
Canada	2020	North America	SSP2	43696.3	37758236	1.26299	0.842	2.11372e+07
Canada	2020	North America	SSP3	43696.3	37758236	1.26299	0.842	2.11372e+07
Canada	2020	North America	SSP4	43696.3	37758236	1.26299	0.842	2.11372e+07
Canada	2020	North America	SSP5	43696.3	37758236	1.26299	0.842	2.11372e+07
Canada	2025	North America	SSP1	48180.6	38656930	1.3926	0.897047	2.37682e+07
Canada	2025	North America	SSP2	48197.3	38643509	1.39308	0.897238	2.37673e+07
Canada	2025	North America	SSP3	48499.6	38402661	1.40182	0.900706	2.37524e+07
Canada	2025	North America	SSP4	48302.8	38559104	1.39613	0.898448	2.37621e+07
Canada	2025	North America	SSP5	47504.4	39207187	1.37305	0.8893	2.38028e+07
Canada	2030	North America	SSP1	52435.9	39483135	1.51559	0.949261	2.63378e+07
Canada	2030	North America	SSP2	52413.8	39443004	1.51495	0.94896	2.62992e+07
Canada	2030	North America	SSP3	52962.4	38954754	1.53081	0.955212	2.62171e+07
Canada	2030	North America	SSP4	52862.5	39188844	1.52792	0.954191	2.63347e+07
Canada	2030	North America	SSP5	51111.6	40649497	1.47732	0.93416	2.6502e+07
Canada	2035	North America	SSP1	57803.4	40264983	1.67073	1.01491	2.95027e+07
Canada	2035	North America	SSP2	57175.6	40185866	1.65259	1.00724	2.91366e+07
Canada	2035	North America	SSP3	57284.8	39441127	1.65574	1.00796	2.86251e+07
Canada	2035	North America	SSP4	58616.3	39666040	1.69423	1.02428	2.94353e+07
Canada	2035	North America	SSP5	56885.3	42116750	1.6442	1.00529	3.04541e+07
Canada	2040	North America	SSP1	64298.3	40980694	1.85846	1.09417	3.32751e+07
Canada	2040	North America	SSP2	62488.1	40862898	1.80614	1.07214	3.22795e+07
Canada	2040	North America	SSP3	61411	39857193	1.77501	1.05828	3.09326e+07
Canada	2040	North America	SSP4	65289.4	39969659	1.88711	1.10536	3.29014e+07
Canada	2040	North America	SSP5	64963.6	43580671	1.87769	1.10432	3.58289e+07
Canada	2045	North America	SSP1	71207	41670639	2.05815	1.17841	3.73459e+07
Canada	2045	North America	SSP2	67962.3	41505006	1.96436	1.13897	3.55605e+07
Canada	2045	North America	SSP3	65037.4	40196602	1.87982	1.10249	3.29728e+07
Canada	2045	North America	SSP4	71999.1	40196831	2.08104	1.18682	3.63629e+07
Canada	2045	North America	SSP5	74273.3	45072932	2.14677	1.2183	4.2193e+07
Canada	2050	North America	SSP1	77662	42362036	2.24472	1.25716	4.13016e+07
Canada	2050	North America	SSP2	73236.9	42171046	2.11682	1.20341	3.88483e+07
Canada	2050	North America	SSP3	67985.6	40565144	1.96504	1.1385	3.47359e+07
Canada	2050	North America	SSP4	77943.6	40390979	2.25286	1.25898	3.94534e+07
Canada	2050	North America	SSP5	83475.8	46606012	2.41276	1.33102	4.88813e+07
Canada	2055	North America	SSP1	83906.7	42910563	2.42522	1.33325	4.51014e+07
Canada	2055	North America	SSP2	78529.1	42738774	2.26978	1.26797	4.21308e+07
Canada	2055	North America	SSP3	70495.6	40879299	2.03758	1.16916	3.62583e+07
Canada	2055	North America	SSP4	83383.8	40459451	2.4101	1.32494	4.21888e+07
Canada	2055	North America	SSP5	92986.3	47992121	2.68765	1.44734	5.59178e+07
Canada	2060	North America	SSP1	90080.6	43350025	2.60366	1.4084	4.88207e+07
Canada	2060	North America	SSP2	83806.2	43273856	2.42231	1.33233	4.54432e+07
Canada	2060	North America	SSP3	72441.3	41250334	2.09382	1.19302	3.7572e+07
Canada	2060	North America	SSP4	88547.7	40457022	2.55936	1.38749	4.47169e+07
Canada	2060	North America	SSP5	103075	49250608	2.97925	1.57057	6.34531e+07
Canada	2065	North America	SSP1	96401	43693804	2.78635	1.48524	5.25653e+07
Canada	2065	North America	SSP2	89238.7	43765387	2.57933	1.39853	4.88568e+07
Canada	2065	North America	SSP3	73997.3	41690785	2.1388	1.21223	3.87738e+07
Canada	2065	North America	SSP4	93709.6	40374075	2.70856	1.44995	4.71471e+07
Canada	2065	North America	SSP5	114054	50329717	3.29658	1.70443	7.15808e+07
Canada	2070	North America	SSP1	102678	43984628	2.96778	1.56151	5.627e+07
Canada	2070	North America	SSP2	94658.2	44224157	2.73597	1.46455	5.22887e+07
Canada	2070	North America	SSP3	75097.9	42197387	2.17061	1.22597	3.98248e+07
Canada	2070	North America	SSP4	98755.3	40211156	2.8544	1.51094	4.94093e+07
Canada	2070	North America	SSP5	125709	51274662	3.63346	1.84638	8.0203e+07
Canada	2075	North America	SSP1	108719	44192317	3.14238	1.63485	5.9777e+07
Canada	2075	North America	SSP2	99940.8	44601111	2.88866	1.52885	5.5602e+07
Canada	2075	North America	SSP3	75776.8	42721306	2.19023	1.23462	4.06886e+07
Canada	2075	North America	SSP4	103548	39918137	2.99292	1.56876	5.13573e+07
Canada	2075	North America	SSP5	137816	52056321	3.98339	1.99367	8.90931e+07
Canada	2080	North America	SSP1	114532	44236531	3.3104	1.70531	6.29534e+07
Canada	2080	North America	SSP2	105109	44846438	3.03804	1.59165	5.87244e+07
Canada	2080	North America	SSP3	76139.5	43228693	2.20071	1.23942	4.13795e+07
Canada	2080	North America	SSP4	108105	39450858	3.12464	1.62359	5.2919e+07
Canada	2080	North America	SSP5	150384	52590093	4.34666	2.14635	9.80358e+07
Canada	2085	North America	SSP1	120246	44015696	3.47556	1.77434	6.56779e+07
Canada	2085	North America	SSP2	110258	44926913	3.18687	1.65409	6.16349e+07
Canada	2085	North America	SSP3	76297.8	43712173	2.20529	1.24173	4.19432e+07
Canada	2085	North America	SSP4	112507	38784085	3.25187	1.67637	5.40719e+07
Canada	2085	North America	SSP5	163582	52766892	4.72813	2.30636	1.06809e+08
Canada	2090	North America	SSP1	126035	43374843	3.64288	1.84395	6.77409e+07
Canada	2090	North America	SSP2	115454	44839693	3.33705	1.71696	6.43344e+07
Canada	2090	North America	SSP3	76301.4	44192449	2.20539	1.24216	4.24231e+07
Canada	2090	North America	SSP4	116812	37919156	3.3763	1.72782	5.4817e+07
Canada	2090	North America	SSP5	177657	52412737	5.13495	2.47658	1.15013e+08
Canada	2095	North America	SSP1	131923	42318186	3.81307	1.91442	6.90729e+07
Canada	2095	North America	SSP2	120684	44615118	3.48822	1.78013	6.68306e+07
Canada	2095	North America	SSP3	76136.1	44713460	2.20062	1.24058	4.28525e+07
Canada	2095	North America	SSP4	121031	36882650	3.49825	1.77809	5.51727e+07
Canada	2095	North America	SSP5	192677	51517753	5.56908	2.6578	1.22386e+08
Canada	2100	North America	SSP1	137787	40940196	3.98256	1.98435	6.96863e+07
Canada	2100	North America	SSP2	125851	44290476	3.63756	1.84246	6.91049e+07
Canada	2100	North America	SSP3	75755.8	45299176	2.18962	1.23644	4.32266e+07
Canada	2100	North America	SSP4	125107	35708477	3.61606	1.82652	5.51455e+07
Canada	2100	North America	SSP5	208538	50151048	6.02752	2.84883	1.28719e+08
China	2003	China	Historical	4400	1288400000	1.12037	0.41595	535909980
China	2004	China	Historical	4820	1296075000	1.21498	0.43557	5.64531e+08
China	2005	China	Historical	5330	1303720000	1.30792	0.50778	6.62003e+08
China	2008	China	Historical	7412.87	1324655000	1.44592	0.5017	6.64579e+08
China	2010	China	Historical	8884.59	1337705000	1.71372	0.46998	6.28695e+08
China	2012	China	Historical	10370.7	1354190000	1.91214	0.5359	725710421
China	2014	China	Historical	11851.4	1371860000	2.02243	0.54501	7.47677e+08
China	2016	China	Historical	13399.1	1387790000	2.10033	0.60713	8.42569e+08
China	2018	China	Historical	15134	1402760000	2.14058	0.6811	955419836
China	2020	China	Historical	16296.6	1411100000	2.40666	0.7948	1121542280
China	2020	China	SSP1	16514.2	1423998017	0.477322	0.7948	1921972121
China	2020	China	SSP2	16514.2	1423998017	0.477322	0.7948	1921972121
China	2020	China	SSP3	16514.2	1423998017	0.477322	0.7948	1921972121
China	2020	China	SSP4	16514.2	1423998017	0.477322	0.7948	1921972121
China	2020	China	SSP5	16514.2	1423998017	0.477322	0.7948	1921972121
China	2025	China	SSP1	21134.3	1426413560	0.61086	0.852716	2007844831
China	2025	China	SSP2	21134.9	1426370434	0.610877	0.852689	2007744830
China	2025	China	SSP3	21105.3	1428374818	0.610022	0.853948	2012365452
China	2025	China	SSP4	21168	1424139759	0.611834	0.851289	2002611215
China	2025	China	SSP5	21149.4	1425395949	0.611296	0.852078	2005502100
China	2030	China	SSP1	25632.2	1416905233	0.740866	0.899525	2060785028
China	2030	China	SSP2	25580.8	1416272717	0.73938	0.898392	2058260023
China	2030	China	SSP3	25427.2	1421431224	0.734941	0.900696	2069031878
China	2030	China	SSP4	25707.1	1410467190	0.743031	0.895235	2045369894
China	2030	China	SSP5	25748.6	1414849110	0.74423	0.899275	2057440871
China	2035	China	SSP1	30399.1	1401086231	0.878647	0.944498	2100788409
China	2035	China	SSP2	29849.3	1398856023	0.862756	0.936038	2085609277
China	2035	China	SSP3	29016.5	1408498514	0.838685	0.933734	2096741304
China	2035	China	SSP4	30258	1387506412	0.874569	0.931826	2062843237
China	2035	China	SSP5	31296.9	1397999217	0.904597	0.952882	2107879597
China	2040	China	SSP1	35049.8	1380363315	1.01307	0.984105	2124387413
China	2040	China	SSP2	33570.9	1375702412	0.970324	0.962427	2087392129
China	2040	China	SSP3	31455.1	1391000595	0.909169	0.949148	2092133310
China	2040	China	SSP4	34434.1	1356053771	0.995274	0.95702	2050246861
China	2040	China	SSP5	37546.3	1376271777	1.08523	1.01104	2155164956
China	2045	China	SSP1	40160.1	1353893142	1.16078	1.02464	2138527815
China	2045	China	SSP2	37480.3	1345324433	1.08332	0.985258	2072014455
China	2045	China	SSP3	33534.5	1365157323	0.969272	0.953472	2059167548
China	2045	China	SSP4	38885.6	1316285125	1.12394	0.978837	2018836823
China	2045	China	SSP5	44790.8	1348841472	1.29462	1.07665	2200709836
China	2050	China	SSP1	45433.4	1319430836	1.31319	1.06069	2131666265
China	2050	China	SSP2	41639.1	1306025392	1.20352	1.00391	2035845304
China	2050	China	SSP3	35528.2	1329535121	1.0269	0.948864	1999308835
China	2050	China	SSP4	43499.2	1266960242	1.25729	0.994902	1963539307
China	2050	China	SSP5	52366.2	1313491264	1.51358	1.13988	2226080261
China	2055	China	SSP1	50716.4	1276179536	1.46589	1.08977	2098897759
China	2055	China	SSP2	45974.5	1257592713	1.32883	1.01732	1977219189
China	2055	China	SSP3	37417.4	1285326799	1.0815	0.936058	1916369636
China	2055	China	SSP4	48129.2	1208363019	1.39111	1.00368	1883331999
China	2055	China	SSP5	60234.8	1269449066	1.74101	1.19964	2227300488
China	2060	China	SSP1	56430	1226382270	1.63104	1.11878	2052573379
China	2060	China	SSP2	50804.7	1203215814	1.46844	1.03193	1909305760
China	2060	China	SSP3	39340.4	1237799422	1.13708	0.920981	1826846632
China	2060	China	SSP4	53166.1	1143350833	1.5367	1.01221	1791755520
China	2060	China	SSP5	69055.2	1218959455	1.99595	1.26572	2219268499
China	2065	China	SSP1	62535.1	1172845902	1.8075	1.14951	1999015027
China	2065	China	SSP2	56040.5	1146749636	1.61978	1.04977	1840157539
China	2065	China	SSP3	41152.2	1191337425	1.18945	0.905418	1739732963
China	2065	China	SSP4	58542.4	1075799483	1.69209	1.0228	1697287045
China	2065	China	SSP5	78895.5	1164901244	2.28037	1.34128	2208866229
China	2070	China	SSP1	68463.1	1118254117	1.97884	1.17725	1936982902
China	2070	China	SSP2	61179.1	1091659030	1.7683	1.06754	1771153833
China	2070	China	SSP3	42546.4	1148489376	1.22975	0.887714	1656827927
China	2070	China	SSP4	63750.1	1008839868	1.84261	1.03182	1600749334
China	2070	China	SSP5	89088.4	1109934866	2.57499	1.42038	2192431247
China	2075	China	SSP1	74023.9	1064529490	2.13957	1.20123	1869458783
China	2075	China	SSP2	66105.2	1038709140	1.91069	1.08446	1702824858
China	2075	China	SSP3	43574.7	1108752458	1.25947	0.868089	1577743680
China	2075	China	SSP4	68651.1	943304482	1.98427	1.03828	1502855816
China	2075	China	SSP5	99377.3	1055966625	2.87237	1.50144	2171430507
China	2080	China	SSP1	79367.3	1011626705	2.29401	1.22325	1798827360
China	2080	China	SSP2	70992.5	986647114	2.05195	1.10164	1634417698
China	2080	China	SSP3	44418.3	1071473198	1.28385	0.84821	1503396785
China	2080	China	SSP4	73421.4	878272281	2.12215	1.04356	1403886873
China	2080	China	SSP5	109945	1002953083	3.17782	1.58666	2147880801
China	2085	China	SSP1	84616	958044798	2.44572	1.24357	1723019561
China	2085	China	SSP2	75952	935604943	2.1953	1.1205	1567518212
China	2085	China	SSP3	45180.4	1037780531	1.30588	0.830241	1437473523
China	2085	China	SSP4	78144	814185982	2.25865	1.04903	1305899209
China	2085	China	SSP5	120963	949400926	3.49628	1.67689	2118862769
China	2090	China	SSP1	89788.9	904770822	2.59523	1.26323	1644988242
China	2090	China	SSP2	81003.9	887408687	2.34131	1.14279	1506546486
China	2090	China	SSP3	45885.8	1008826625	1.32627	0.81541	1382406535
China	2090	China	SSP4	82819.6	753004609	2.39379	1.05627	1213223167
China	2090	China	SSP5	132472	896282530	3.82893	1.77342	2086832396
China	2095	China	SSP1	94762.3	854614287	2.73898	1.28298	1570677824
China	2095	China	SSP2	86086.5	842783736	2.48822	1.16833	1452312538
China	2095	China	SSP3	46506.7	984245769	1.34422	0.803086	1336593409
China	2095	China	SSP4	87397	695457910	2.5261	1.06526	1126756650
China	2095	China	SSP5	144305	846370703	4.17095	1.87646	2057835297
China	2100	China	SSP1	99411.5	808290646	2.87336	1.3019	1500832986
China	2100	China	SSP2	91139.5	800215809	2.63427	1.19517	1400438345
China	2100	China	SSP3	47008.3	963366158	1.35871	0.792305	1297853271
China	2100	China	SSP4	91850.5	640131867	2.65482	1.07454	1043060258
China	2100	China	SSP5	156271	800356048	4.51681	1.98426	2032236638
Colombia	2003	Latin America and the Caribbean	Historical	9450	41057687	0.17398	0.44339	1.82046e+07
Colombia	2004	Latin America and the Caribbean	Historical	9820	41648268	0.16964	0.53345	2.22173e+07
Colombia	2005	Latin America and the Caribbean	Historical	10200	42220940	0.16557	0.52211	2.2044e+07
Colombia	2008	Latin America and the Caribbean	Historical	11507.5	43815313	0.19541	0.5317	2.32966e+07
Colombia	2010	Latin America and the Caribbean	Historical	11890.2	44816108	0.19358	0.6125	2.74499e+07
Colombia	2012	Latin America and the Caribbean	Historical	12935	45782417	0.22116	0.65723	3.00896e+07
Colombia	2014	Latin America and the Caribbean	Historical	13938.2	46677947	0.30317	0.6173	2.88143e+07
Colombia	2016	Latin America and the Caribbean	Historical	14358.2	47625955	0.27051	0.62371	2.97048e+07
Colombia	2018	Latin America and the Caribbean	Historical	14426.4	49276961	0.31233	0.6871	3.38582e+07
Colombia	2020	Latin America and the Caribbean	Historical	13358.3	50930662	0.28961	0.7164	3.64867e+07
Colombia	2020	Latin America and the Caribbean	SSP1	12522.4	50617026	0.361944	0.7164	9.74664e+06
Colombia	2020	Latin America and the Caribbean	SSP2	12522.4	50617026	0.361944	0.7164	9.74664e+06
Colombia	2020	Latin America and the Caribbean	SSP3	12522.4	50617026	0.361944	0.7164	9.74664e+06
Colombia	2020	Latin America and the Caribbean	SSP4	12522.4	50617026	0.361944	0.7164	9.74664e+06
Colombia	2020	Latin America and the Caribbean	SSP5	12522.4	50617026	0.361944	0.7164	9.74664e+06
Colombia	2025	Latin America and the Caribbean	SSP1	15265.6	52254432	0.441233	0.750952	1.18674e+07
Colombia	2025	Latin America and the Caribbean	SSP2	15217.8	52418803	0.439851	0.750506	1.18814e+07
Colombia	2025	Latin America and the Caribbean	SSP3	15160.4	52617326	0.438192	0.749971	1.18982e+07
Colombia	2025	Latin America and the Caribbean	SSP4	15167	52594344	0.438383	0.750032	1.18962e+07
Colombia	2025	Latin America and the Caribbean	SSP5	15296.7	52148301	0.442131	0.751243	1.18585e+07
Colombia	2030	Latin America and the Caribbean	SSP1	17177.1	53731331	0.496482	0.775299	1.35111e+07
Colombia	2030	Latin America and the Caribbean	SSP2	16992.2	54193535	0.491138	0.773433	1.35261e+07
Colombia	2030	Latin America and the Caribbean	SSP3	16785.9	54736042	0.485175	0.771372	1.35487e+07
Colombia	2030	Latin America and the Caribbean	SSP4	16844.1	54717013	0.486857	0.772061	1.35817e+07
Colombia	2030	Latin America and the Caribbean	SSP5	17299.9	53508486	0.500031	0.776607	1.3525e+07
Colombia	2035	Latin America and the Caribbean	SSP1	20273.3	54762240	0.585974	0.813638	15869795
Colombia	2035	Latin America and the Caribbean	SSP2	19583	55597123	0.566022	0.80595	1.56843e+07
Colombia	2035	Latin America and the Caribbean	SSP3	18831	56601105	0.544286	0.797651	1.54978e+07
Colombia	2035	Latin America and the Caribbean	SSP4	19386.4	56584731	0.560339	0.804366	1.58733e+07
Colombia	2035	Latin America and the Caribbean	SSP5	20958.7	54417535	0.605784	0.821662	1.62066e+07
Colombia	2040	Latin America and the Caribbean	SSP1	24633.6	55351789	0.712003	0.866933	1.89906e+07
Colombia	2040	Latin America and the Caribbean	SSP2	22944	56625133	0.663167	0.847494	1.83267e+07
Colombia	2040	Latin America and the Caribbean	SSP3	21088.2	58193238	0.609527	0.826279	1.75997e+07
Colombia	2040	Latin America and the Caribbean	SSP4	22855.6	58167028	0.660612	0.847668	1.88359e+07
Colombia	2040	Latin America and the Caribbean	SSP5	26608.9	54885169	0.769096	0.890484	2.01231e+07
Colombia	2045	Latin America and the Caribbean	SSP1	30005.4	55598330	0.867268	0.932204	2.27041e+07
Colombia	2045	Latin America and the Caribbean	SSP2	26888.7	57273481	0.777183	0.895802	2.13033e+07
Colombia	2045	Latin America and the Caribbean	SSP3	23277.8	59392542	0.672815	0.853771	1.95953e+07
Colombia	2045	Latin America and the Caribbean	SSP4	27154.7	59338277	0.784872	0.900691	2.23615e+07
Colombia	2045	Latin America and the Caribbean	SSP5	33963.1	55012087	0.98166	0.979672	2.50761e+07
Colombia	2050	Latin America and the Caribbean	SSP1	35902.2	55512640	1.03771	1.00357	2.66307e+07
Colombia	2050	Latin America and the Caribbean	SSP2	31256.7	57593308	0.903435	0.948972	2.44846e+07
Colombia	2050	Latin America and the Caribbean	SSP3	25334.5	60318807	0.732261	0.879433	2.14488e+07
Colombia	2050	Latin America and the Caribbean	SSP4	31992.7	60242700	0.924708	0.960027	2.62769e+07
Colombia	2050	Latin America and the Caribbean	SSP5	42212.8	54811090	1.22011	1.07944	3.04531e+07
Colombia	2055	Latin America and the Caribbean	SSP1	42168	55115279	1.21881	1.07915	3.06057e+07
Colombia	2055	Latin America and the Caribbean	SSP2	36005.5	57636127	1.04069	1.00653	2.78203e+07
Colombia	2055	Latin America and the Caribbean	SSP3	27245.9	61068381	0.787508	0.903192	2.31662e+07
Colombia	2055	Latin America and the Caribbean	SSP4	37264.4	60976144	1.07708	1.02448	3.05268e+07
Colombia	2055	Latin America and the Caribbean	SSP5	51243.4	54304074	1.48112	1.18843	3.60896e+07
Colombia	2060	Latin America and the Caribbean	SSP1	48784.1	54415737	1.41004	1.15873	3.45476e+07
Colombia	2060	Latin America and the Caribbean	SSP2	41093.1	57435914	1.18774	1.068	3.12541e+07
Colombia	2060	Latin America and the Caribbean	SSP3	28931.4	61699923	0.836225	0.92412	2.4697e+07
Colombia	2060	Latin America and the Caribbean	SSP4	42835.1	61593699	1.23809	1.09246	3.50231e+07
Colombia	2060	Latin America and the Caribbean	SSP5	61161	53501802	1.76778	1.30792	4.19494e+07
Colombia	2065	Latin America and the Caribbean	SSP1	55753.9	53481648	1.61149	1.2424	3.84297e+07
Colombia	2065	Latin America and the Caribbean	SSP2	46557.1	57018611	1.34567	1.13385	3.47818e+07
Colombia	2065	Latin America and the Caribbean	SSP3	30448.5	62189522	0.880075	0.942893	2.60605e+07
Colombia	2065	Latin America and the Caribbean	SSP4	48758.1	62072518	1.40929	1.16459	3.97729e+07
Colombia	2065	Latin America and the Caribbean	SSP5	72070.5	52483715	2.08311	1.43925	4.80439e+07
Colombia	2070	Latin America and the Caribbean	SSP1	62976.7	52335194	1.82026	1.32897	4.21365e+07
Colombia	2070	Latin America and the Caribbean	SSP2	52363.4	56394002	1.5135	1.20368	3.83388e+07
Colombia	2070	Latin America and the Caribbean	SSP3	31817.2	62536899	0.919635	0.959753	2.72604e+07
Colombia	2070	Latin America and the Caribbean	SSP4	55024.1	62406934	1.5904	1.24077	4.4741e+07
Colombia	2070	Latin America and the Caribbean	SSP5	83911.3	51272607	2.42535	1.58171	5.42394e+07
Colombia	2075	Latin America and the Caribbean	SSP1	70318.3	51007475	2.03246	1.41683	4.55491e+07
Colombia	2075	Latin America and the Caribbean	SSP2	58449.7	55572196	1.68941	1.27675	4.18404e+07
Colombia	2075	Latin America and the Caribbean	SSP3	33042.1	62764330	0.95504	0.974774	2.83024e+07
Colombia	2075	Latin America and the Caribbean	SSP4	61589.6	62617353	1.78017	1.32047	4.98826e+07
Colombia	2075	Latin America and the Caribbean	SSP5	96560.7	49899863	2.79096	1.73383	6.0378e+07
Colombia	2080	Latin America and the Caribbean	SSP1	77631.2	49488183	2.24383	1.50419	4.85156e+07
Colombia	2080	Latin America and the Caribbean	SSP2	64740	54532819	1.87123	1.3521	4.51674e+07
Colombia	2080	Latin America and the Caribbean	SSP3	34114.5	62887211	0.986036	0.987864	2.9181e+07
Colombia	2080	Latin America and the Caribbean	SSP4	68371.3	62723588	1.97618	1.40271	5.51254e+07
Colombia	2080	Latin America and the Caribbean	SSP5	109861	48355828	3.17539	1.89369	6.62403e+07
Colombia	2085	Latin America and the Caribbean	SSP1	84865.2	47791378	2.45292	1.59045	5.09746e+07
Colombia	2085	Latin America and the Caribbean	SSP2	71198.8	53348143	2.05791	1.42939	4.83091e+07
Colombia	2085	Latin America and the Caribbean	SSP3	35044	63015995	1.0129	0.999228	2.99568e+07
Colombia	2085	Latin America and the Caribbean	SSP4	75312.1	62835680	2.1768	1.48687	6.05127e+07
Colombia	2085	Latin America and the Caribbean	SSP5	123776	46654379	3.57759	2.06088	7.17096e+07
Colombia	2090	Latin America and the Caribbean	SSP1	92008.3	45939528	2.65938	1.67548	5.29058e+07
Colombia	2090	Latin America and the Caribbean	SSP2	77813.2	52086930	2.24909	1.50849	5.12874e+07
Colombia	2090	Latin America and the Caribbean	SSP3	35848.5	63264995	1.03615	1.00917	3.07045e+07
Colombia	2090	Latin America and the Caribbean	SSP4	82378.1	63064814	2.38103	1.57265	6.6143e+07
Colombia	2090	Latin America and the Caribbean	SSP5	138316	44817428	3.99785	2.23553	7.67134e+07
Colombia	2095	Latin America and the Caribbean	SSP1	99022.9	43953015	2.86213	1.75885	5.42823e+07
Colombia	2095	Latin America and the Caribbean	SSP2	84545.7	50818420	2.44369	1.58902	5.41308e+07
Colombia	2095	Latin America and the Caribbean	SSP3	36547.8	63681657	1.05637	1.01798	3.14675e+07
Colombia	2095	Latin America and the Caribbean	SSP4	89552.5	63455836	2.5884	1.65988	7.2088e+07
Colombia	2095	Latin America and the Caribbean	SSP5	153451	42864816	4.4353	2.41729	8.11624e+07
Colombia	2100	Latin America and the Caribbean	SSP1	105828	41864942	3.05882	1.8396	5.50841e+07
Colombia	2100	Latin America and the Caribbean	SSP2	91341.7	49607447	2.64011	1.67037	5.68763e+07
Colombia	2100	Latin America and the Caribbean	SSP3	37170.1	64272196	1.07435	1.026	3.22745e+07
Colombia	2100	Latin America and the Caribbean	SSP4	96848.6	64011377	2.79928	1.74871	7.84052e+07
Colombia	2100	Latin America and the Caribbean	SSP5	169077	40827911	4.88695	2.60494	8.49667e+07
Costa Rica	2003	Latin America and the Caribbean	Historical	13333.2	4188610	0.3619	0.42674	1.78745e+06
Costa Rica	2004	Latin America and the Caribbean	Historical	13713	4252800	0.37288	0.41883	1.7812e+06
Costa Rica	2005	Latin America and the Caribbean	Historical	14049.9	4315887	0.37837	0.46115	1.99027e+06
Costa Rica	2008	Latin America and the Caribbean	Historical	16385	4501921	0.38593	0.5144	2.31579e+06
Costa Rica	2010	Latin America and the Caribbean	Historical	16667	4622252	0.4799	0.47486	2.19492e+06
Costa Rica	2012	Latin America and the Caribbean	Historical	17809.9	4736593	0.54713	0.53971	2.55639e+06
Costa Rica	2014	Latin America and the Caribbean	Historical	18480.7	4844288	0.55627	0.60614	2.93632e+06
Costa Rica	2016	Latin America and the Caribbean	Historical	19553.6	4945205	0.44335	0.63142	3.1225e+06
Costa Rica	2018	Latin America and the Caribbean	Historical	20503.3	5040734	0.37144	0.7004	3.53053e+06
Costa Rica	2020	Latin America and the Caribbean	Historical	19778.4	5123105	0.33002	0.7576	3.88126e+06
Costa Rica	2020	Latin America and the Caribbean	SSP1	18231.6	5105361	0.526961	0.7576	1.14856e+06
Costa Rica	2020	Latin America and the Caribbean	SSP2	18231.6	5105361	0.526961	0.7576	1.14856e+06
Costa Rica	2020	Latin America and the Caribbean	SSP3	18231.6	5105361	0.526961	0.7576	1.14856e+06
Costa Rica	2020	Latin America and the Caribbean	SSP4	18231.6	5105361	0.526961	0.7576	1.14856e+06
Costa Rica	2020	Latin America and the Caribbean	SSP5	18231.6	5105361	0.526961	0.7576	1.14856e+06
Costa Rica	2025	Latin America and the Caribbean	SSP1	22561.5	5244154	0.652111	0.810163	1.45543e+06
Costa Rica	2025	Latin America and the Caribbean	SSP2	22507.8	5256654	0.650559	0.809522	1.45554e+06
Costa Rica	2025	Latin America and the Caribbean	SSP3	22498.9	5258754	0.650302	0.809416	1.45556e+06
Costa Rica	2025	Latin America and the Caribbean	SSP4	22451.1	5269949	0.64892	0.808846	1.45566e+06
Costa Rica	2025	Latin America and the Caribbean	SSP5	22484.1	5262210	0.649874	0.80924	1.45559e+06
Costa Rica	2030	Latin America and the Caribbean	SSP1	25317.2	5372717	0.731761	0.843648	1.67102e+06
Costa Rica	2030	Latin America and the Caribbean	SSP2	25125.7	5409067	0.726226	0.841358	1.66994e+06
Costa Rica	2030	Latin America and the Caribbean	SSP3	25031.6	5422842	0.723506	0.840229	1.66807e+06
Costa Rica	2030	Latin America and the Caribbean	SSP4	24949.8	5449343	0.721142	0.839259	1.67094e+06
Costa Rica	2030	Latin America and the Caribbean	SSP5	25178.2	5411131	0.727744	0.841995	1.67403e+06
Costa Rica	2035	Latin America and the Caribbean	SSP1	29491.9	5470682	0.852426	0.894298	1.97858e+06
Costa Rica	2035	Latin America and the Caribbean	SSP2	28920.1	5537746	0.835898	0.887425	1.96478e+06
Costa Rica	2035	Latin America and the Caribbean	SSP3	28412.8	5571987	0.821236	0.881308	1.94284e+06
Costa Rica	2035	Latin America and the Caribbean	SSP4	28617.9	5616215	0.827164	0.883828	1.97241e+06
Costa Rica	2035	Latin America and the Caribbean	SSP5	29677.5	5531614	0.85779	0.896595	2.01333e+06
Costa Rica	2040	Latin America and the Caribbean	SSP1	34423.4	5535824	0.994964	0.954088	2.33313e+06
Costa Rica	2040	Latin America and the Caribbean	SSP2	33179.1	5639492	0.958999	0.939099	2.29229e+06
Costa Rica	2040	Latin America and the Caribbean	SSP3	31895.8	5701048	0.921907	0.923604	2.22897e+06
Costa Rica	2040	Latin America and the Caribbean	SSP4	32834.2	5764255	0.94903	0.935022	2.3195e+06
Costa Rica	2040	Latin America and the Caribbean	SSP5	35606.9	5621205	1.02917	0.968494	2.45009e+06
Costa Rica	2045	Latin America and the Caribbean	SSP1	39880.4	5574708	1.15269	1.02022	2.7182e+06
Costa Rica	2045	Latin America and the Caribbean	SSP2	37760.1	5711679	1.09141	0.99465	2.63892e+06
Costa Rica	2045	Latin America and the Caribbean	SSP3	35382.4	5796685	1.02268	0.965916	2.51163e+06
Costa Rica	2045	Latin America and the Caribbean	SSP4	37570.7	5879095	1.08593	0.992491	2.70358e+06
Costa Rica	2045	Latin America and the Caribbean	SSP5	42781.1	5686424	1.23653	1.05545	2.973e+06
Costa Rica	2050	Latin America and the Caribbean	SSP1	45470.6	5581988	1.31427	1.08795	3.09978e+06
Costa Rica	2050	Latin America and the Caribbean	SSP2	42480.6	5751038	1.22785	1.05186	2.98615e+06
Costa Rica	2050	Latin America and the Caribbean	SSP3	38706.4	5861138	1.11876	1.00623	2.77587e+06
Costa Rica	2050	Latin America and the Caribbean	SSP4	42579.4	5964605	1.2307	1.05323	3.1052e+06
Costa Rica	2050	Latin America and the Caribbean	SSP5	50559.1	5721616	1.46135	1.1497	3.53065e+06
Costa Rica	2055	Latin America and the Caribbean	SSP1	51179.9	5558868	1.47929	1.15709	3.47129e+06
Costa Rica	2055	Latin America and the Caribbean	SSP2	47368.7	5761894	1.36913	1.11109	3.33301e+06
Costa Rica	2055	Latin America and the Caribbean	SSP3	41860	5903448	1.20991	1.04447	3.02163e+06
Costa Rica	2055	Latin America and the Caribbean	SSP4	47847.5	6029834	1.38297	1.1171	3.52428e+06
Costa Rica	2055	Latin America and the Caribbean	SSP5	58938.7	5727722	1.70355	1.25121	4.11585e+06
Costa Rica	2060	Latin America and the Caribbean	SSP1	57119.9	5506218	1.65098	1.229	3.83438e+06
Costa Rica	2060	Latin America and the Caribbean	SSP2	52460.6	5749131	1.51631	1.17276	3.68018e+06
Costa Rica	2060	Latin America and the Caribbean	SSP3	44768.6	5932360	1.29398	1.07973	3.24558e+06
Costa Rica	2060	Latin America and the Caribbean	SSP4	53312.5	6083208	1.54093	1.18335	3.95845e+06
Costa Rica	2060	Latin America and the Caribbean	SSP5	68120.6	5705247	1.96894	1.36242	4.73417e+06
Costa Rica	2065	Latin America and the Caribbean	SSP1	63269.1	5427953	1.82871	1.30343	4.18386e+06
Costa Rica	2065	Latin America and the Caribbean	SSP2	57730.4	5714681	1.66862	1.23656	4.02277e+06
Costa Rica	2065	Latin America and the Caribbean	SSP3	47388	5948542	1.36969	1.11147	3.44326e+06
Costa Rica	2065	Latin America and the Caribbean	SSP4	58945.2	6122859	1.70374	1.25161	4.40222e+06
Costa Rica	2065	Latin America and the Caribbean	SSP5	78149.2	5655020	2.2588	1.48386	5.37924e+06
Costa Rica	2070	Latin America and the Caribbean	SSP1	69327.5	5328400	2.00382	1.37674	4.49774e+06
Costa Rica	2070	Latin America and the Caribbean	SSP2	62969.6	5659395	1.82006	1.29999	4.34278e+06
Costa Rica	2070	Latin America and the Caribbean	SSP3	49593.8	5951557	1.43345	1.13819	3.60405e+06
Costa Rica	2070	Latin America and the Caribbean	SSP4	64574.6	6147426	1.86645	1.31982	4.83921e+06
Costa Rica	2070	Latin America and the Caribbean	SSP5	88696.5	5581012	2.56366	1.61157	6.02157e+06
Costa Rica	2075	Latin America and the Caribbean	SSP1	75211.6	5207688	2.17389	1.44792	4.76653e+06
Costa Rica	2075	Latin America and the Caribbean	SSP2	68171.7	5579778	1.97042	1.36294	4.63294e+06
Costa Rica	2075	Latin America and the Caribbean	SSP3	51450.2	5939066	1.4871	1.16067	3.72998e+06
Costa Rica	2075	Latin America and the Caribbean	SSP4	70232.4	6153887	2.02998	1.38836	5.2661e+06
Costa Rica	2075	Latin America and the Caribbean	SSP5	99661.3	5483093	2.88058	1.74431	6.64377e+06
Costa Rica	2080	Latin America and the Caribbean	SSP1	80794.7	5063308	2.33527	1.51543	4.97623e+06
Costa Rica	2080	Latin America and the Caribbean	SSP2	73275.1	5476208	2.11792	1.42467	4.88503e+06
Costa Rica	2080	Latin America and the Caribbean	SSP3	52972.2	5914567	1.53109	1.17909	3.82352e+06
Costa Rica	2080	Latin America and the Caribbean	SSP4	75883.8	6145376	2.19332	1.45682	5.67948e+06
Costa Rica	2080	Latin America and the Caribbean	SSP5	110888	5358519	3.20508	1.88021	7.22103e+06
Costa Rica	2085	Latin America and the Caribbean	SSP1	86138.7	4892905	2.48973	1.58003	5.12483e+06
Costa Rica	2085	Latin America and the Caribbean	SSP2	78349.4	5351755	2.26459	1.48604	5.10244e+06
Costa Rica	2085	Latin America and the Caribbean	SSP3	54239.3	5886809	1.56772	1.19441	3.89581e+06
Costa Rica	2085	Latin America and the Caribbean	SSP4	81575.9	6130320	2.35785	1.52575	6.08818e+06
Costa Rica	2085	Latin America and the Caribbean	SSP5	122454	5204626	3.53938	2.02019	7.74219e+06
Costa Rica	2090	Latin America and the Caribbean	SSP1	91258.3	4697066	2.6377	1.64189	5.21026e+06
Costa Rica	2090	Latin America and the Caribbean	SSP2	83395.3	5214360	2.41043	1.54705	5.28959e+06
Costa Rica	2090	Latin America and the Caribbean	SSP3	55273.3	5864991	1.5976	1.20692	3.95473e+06
Costa Rica	2090	Latin America and the Caribbean	SSP4	87290.1	6117221	2.52301	1.59496	6.49854e+06
Costa Rica	2090	Latin America and the Caribbean	SSP5	134382	5021592	3.88414	2.16453	8.19475e+06
Costa Rica	2095	Latin America and the Caribbean	SSP1	96135.9	4479343	2.77868	1.7008	5.23262e+06
Costa Rica	2095	Latin America and the Caribbean	SSP2	88397.8	5071476	2.55503	1.60754	5.45138e+06
Costa Rica	2095	Latin America and the Caribbean	SSP3	56100.4	5852833	1.62151	1.21693	4.00511e+06
Costa Rica	2095	Latin America and the Caribbean	SSP4	93015	6109546	2.68848	1.66431	6.91404e+06
Costa Rica	2095	Latin America and the Caribbean	SSP5	146656	4812571	4.2389	2.31304	8.56838e+06
Costa Rica	2100	Latin America and the Caribbean	SSP1	100703	4244951	2.91069	1.75593	5.19286e+06
Costa Rica	2100	Latin America and the Caribbean	SSP2	93307	4927831	2.69692	1.66689	5.58945e+06
Costa Rica	2100	Latin America and the Caribbean	SSP3	56733.8	5852211	1.63982	1.2246	4.04958e+06
Costa Rica	2100	Latin America and the Caribbean	SSP4	98722.7	6109049	2.85345	1.73345	7.33586e+06
Costa Rica	2100	Latin America and the Caribbean	SSP5	159183	4582349	4.60098	2.46461	8.853e+06
Croatia	2003	Central and Eastern Europe	Historical	21933.1	4303399	0.94069	0.53142	2.28691e+06
Croatia	2004	Central and Eastern Europe	Historical	22843.5	4304600	1.02002	0.52266	2.24984e+06
Croatia	2005	Central and Eastern Europe	Historical	23800	4310145	0.84776	0.54802	2.36205e+06
Croatia	2008	Central and Eastern Europe	Historical	26805.3	4309705	0.87801	0.565	2.43498e+06
Croatia	2010	Central and Eastern Europe	Historical	24643.2	4295427	0.73234	0.5858	2.51626e+06
Croatia	2012	Central and Eastern Europe	Historical	24203.6	4267558	0.73956	0.73284	3.12744e+06
Croatia	2014	Central and Eastern Europe	Historical	24170.2	4238389	0.77259	0.62817	2.66243e+06
Croatia	2016	Central and Eastern Europe	Historical	26056.3	4174349	0.84995	0.71624	2.98984e+06
Croatia	2018	Central and Eastern Europe	Historical	28288.2	4087843	0.95125	0.7018	2.86885e+06
Croatia	2020	Central and Eastern Europe	Historical	27002.2	4047680	1.24261	0.7745	3.13493e+06
Croatia	2020	Central and Eastern Europe	SSP1	26501.1	4114644	0.76598	0.7745	1.33457e+06
Croatia	2020	Central and Eastern Europe	SSP2	26501.1	4114644	0.76598	0.7745	1.33457e+06
Croatia	2020	Central and Eastern Europe	SSP3	26501.1	4114644	0.76598	0.7745	1.33457e+06
Croatia	2020	Central and Eastern Europe	SSP4	26501.1	4114644	0.76598	0.7745	1.33457e+06
Croatia	2020	Central and Eastern Europe	SSP5	26501.1	4114644	0.76598	0.7745	1.33457e+06
Croatia	2025	Central and Eastern Europe	SSP1	35552.9	3986789	1.02761	0.884047	1.72984e+06
Croatia	2025	Central and Eastern Europe	SSP2	35610.1	3980382	1.02926	0.884734	1.72979e+06
Croatia	2025	Central and Eastern Europe	SSP3	35415.9	4002209	1.02365	0.8824	1.72994e+06
Croatia	2025	Central and Eastern Europe	SSP4	35680.2	3972547	1.03129	0.885577	1.72974e+06
Croatia	2025	Central and Eastern Europe	SSP5	35959.3	3941731	1.03936	0.888933	1.72955e+06
Croatia	2030	Central and Eastern Europe	SSP1	41750.7	3862793	1.20675	0.959024	1.96566e+06
Croatia	2030	Central and Eastern Europe	SSP2	41847.7	3847939	1.20955	0.960187	1.96257e+06
Croatia	2030	Central and Eastern Europe	SSP3	41323.1	3889396	1.19439	0.953866	1.95913e+06
Croatia	2030	Central and Eastern Europe	SSP4	42144.4	3826024	1.21813	0.963764	1.96508e+06
Croatia	2030	Central and Eastern Europe	SSP5	42744.2	3782199	1.23547	0.970994	1.96992e+06
Croatia	2035	Central and Eastern Europe	SSP1	47289.7	3746386	1.36685	1.02603	2.15744e+06
Croatia	2035	Central and Eastern Europe	SSP2	46858.9	3722464	1.3544	1.02079	2.12417e+06
Croatia	2035	Central and Eastern Europe	SSP3	45224.7	3782988	1.30716	1.00104	2.084e+06
Croatia	2035	Central and Eastern Europe	SSP4	47949.5	3680350	1.38592	1.03397	2.14863e+06
Croatia	2035	Central and Eastern Europe	SSP5	49845.7	3640226	1.44073	1.0569	2.20871e+06
Croatia	2040	Central and Eastern Europe	SSP1	52142.8	3635156	1.50712	1.08473	2.30677e+06
Croatia	2040	Central and Eastern Europe	SSP2	50818.9	3602983	1.46886	1.06866	2.22848e+06
Croatia	2040	Central and Eastern Europe	SSP3	47519.8	3681933	1.3735	1.02876	2.1304e+06
Croatia	2040	Central and Eastern Europe	SSP4	52933.8	3534585	1.52998	1.09423	2.27653e+06
Croatia	2040	Central and Eastern Europe	SSP5	56947.9	3513451	1.64601	1.14283	2.4337e+06
Croatia	2045	Central and Eastern Europe	SSP1	56246.1	3531209	1.62572	1.13435	2.41603e+06
Croatia	2045	Central and Eastern Europe	SSP2	54073.6	3491355	1.56293	1.108	2.29677e+06
Croatia	2045	Central and Eastern Europe	SSP3	48961.1	3584482	1.41516	1.04614	2.13631e+06
Croatia	2045	Central and Eastern Europe	SSP4	56990.1	3395871	1.64723	1.14325	2.35367e+06
Croatia	2045	Central and Eastern Europe	SSP5	63369.1	3403006	1.8316	1.22053	2.62159e+06
Croatia	2050	Central and Eastern Europe	SSP1	59565.8	3433610	1.72167	1.17448	2.48706e+06
Croatia	2050	Central and Eastern Europe	SSP2	56840.1	3389205	1.64289	1.14143	2.34287e+06
Croatia	2050	Central and Eastern Europe	SSP3	49972	3495417	1.44438	1.05832	2.12578e+06
Croatia	2050	Central and Eastern Europe	SSP4	60141.1	3265599	1.7383	1.18132	2.38768e+06
Croatia	2050	Central and Eastern Europe	SSP5	68786.5	3306704	1.98819	1.28608	2.76414e+06
Croatia	2055	Central and Eastern Europe	SSP1	62456.5	3339610	1.80523	1.20942	2.53566e+06
Croatia	2055	Central and Eastern Europe	SSP2	59347	3296089	1.71535	1.17172	2.37835e+06
Croatia	2055	Central and Eastern Europe	SSP3	50724.6	3418171	1.46613	1.06737	2.10975e+06
Croatia	2055	Central and Eastern Europe	SSP4	62760.5	3143521	1.81401	1.21295	2.39786e+06
Croatia	2055	Central and Eastern Europe	SSP5	73828.9	3219694	2.13393	1.34709	2.88785e+06
Croatia	2060	Central and Eastern Europe	SSP1	65286.8	3247516	1.88703	1.24363	2.57684e+06
Croatia	2060	Central and Eastern Europe	SSP2	61802	3211836	1.78631	1.20139	2.41285e+06
Croatia	2060	Central and Eastern Europe	SSP3	51261.8	3355596	1.48166	1.07383	2.0928e+06
Croatia	2060	Central and Eastern Europe	SSP4	65236.2	3029406	1.88557	1.24285	2.40138e+06
Croatia	2060	Central and Eastern Europe	SSP5	79094.6	3138334	2.28613	1.41081	3.01485e+06
Croatia	2065	Central and Eastern Europe	SSP1	68231.4	3157675	1.97214	1.27923	2.61796e+06
Croatia	2065	Central and Eastern Europe	SSP2	64326.4	3134640	1.85927	1.23191	2.45052e+06
Croatia	2065	Central and Eastern Europe	SSP3	51634.9	3305123	1.49244	1.07831	2.07612e+06
Croatia	2065	Central and Eastern Europe	SSP4	67757.3	2922052	1.95844	1.2733	2.40527e+06
Croatia	2065	Central and Eastern Europe	SSP5	84877.7	3061246	2.45328	1.4808	3.15506e+06
Croatia	2070	Central and Eastern Europe	SSP1	71270.9	3070099	2.05999	1.31598	2.65817e+06
Croatia	2070	Central and Eastern Europe	SSP2	66898.4	3062038	1.93361	1.26301	2.48898e+06
Croatia	2070	Central and Eastern Europe	SSP3	51826.2	3264734	1.49797	1.08059	2.05821e+06
Croatia	2070	Central and Eastern Europe	SSP4	70335.4	2818579	2.03295	1.30444	2.40788e+06
Croatia	2070	Central and Eastern Europe	SSP5	91177.6	2987568	2.63537	1.55706	3.30694e+06
Croatia	2075	Central and Eastern Europe	SSP1	74396.2	2984032	2.15033	1.35377	2.69641e+06
Croatia	2075	Central and Eastern Europe	SSP2	69533.5	2991861	2.00978	1.29487	2.52727e+06
Croatia	2075	Central and Eastern Europe	SSP3	51889.9	3233470	1.49981	1.08134	2.04091e+06
Croatia	2075	Central and Eastern Europe	SSP4	72990.7	2716698	2.1097	1.33653	2.40801e+06
Croatia	2075	Central and Eastern Europe	SSP5	97974.9	2915899	2.83184	1.63934	3.46754e+06
Croatia	2080	Central and Eastern Europe	SSP1	77572	2898029	2.24212	1.39217	2.72999e+06
Croatia	2080	Central and Eastern Europe	SSP2	72212.8	2924182	2.08722	1.32727	2.56485e+06
Croatia	2080	Central and Eastern Europe	SSP3	51834.1	3211826	1.4982	1.08064	2.02503e+06
Croatia	2080	Central and Eastern Europe	SSP4	75697	2616518	2.18792	1.36923	2.40478e+06
Croatia	2080	Central and Eastern Europe	SSP5	105262	2844043	3.04246	1.72755	3.63297e+06
Croatia	2085	Central and Eastern Europe	SSP1	80856.6	2810969	2.33706	1.43189	2.75962e+06
Croatia	2085	Central and Eastern Europe	SSP2	74997.2	2859680	2.1677	1.36095	2.60458e+06
Croatia	2085	Central and Eastern Europe	SSP3	51703.8	3200192	1.49443	1.07906	2.01261e+06
Croatia	2085	Central and Eastern Europe	SSP4	78508.8	2518693	2.2692	1.40321	2.40046e+06
Croatia	2085	Central and Eastern Europe	SSP5	113152	2769792	3.27051	1.82307	3.80269e+06
Croatia	2090	Central and Eastern Europe	SSP1	84316.5	2722364	2.43706	1.47373	2.78654e+06
Croatia	2090	Central and Eastern Europe	SSP2	77955.2	2798442	2.2532	1.39673	2.64894e+06
Croatia	2090	Central and Eastern Europe	SSP3	51520.7	3198064	1.48914	1.07684	2.00417e+06
Croatia	2090	Central and Eastern Europe	SSP4	81485.2	2423285	2.35523	1.43919	2.39671e+06
Croatia	2090	Central and Eastern Europe	SSP5	121798	2691564	3.52042	1.92774	3.97701e+06
Croatia	2095	Central and Eastern Europe	SSP1	88027.3	2631022	2.54432	1.51861	2.81112e+06
Croatia	2095	Central and Eastern Europe	SSP2	81165.4	2738736	2.34598	1.43557	2.69879e+06
Croatia	2095	Central and Eastern Europe	SSP3	51307.3	3203635	1.48297	1.07426	1.9994e+06
Croatia	2095	Central and Eastern Europe	SSP4	84707.2	2328362	2.44835	1.47814	2.39353e+06
Croatia	2095	Central and Eastern Europe	SSP5	131362	2607678	3.79685	2.04353	4.155e+06
Croatia	2100	Central and Eastern Europe	SSP1	92029.5	2535312	2.65999	1.56701	2.83158e+06
Croatia	2100	Central and Eastern Europe	SSP2	84673	2678769	2.44736	1.47801	2.75339e+06
Croatia	2100	Central and Eastern Europe	SSP3	51079.8	3214750	1.4764	1.07151	1.9975e+06
Croatia	2100	Central and Eastern Europe	SSP4	88232	2231860	2.55023	1.52076	2.38945e+06
Croatia	2100	Central and Eastern Europe	SSP5	141957	2516668	4.10309	2.1718	4.3328e+06
Cyprus	2003	Western Europe	Historical	25289.7	1000350	0.31834	0.47406	474226
Cyprus	2004	Western Europe	Historical	26082.8	1018684	0.33564	0.51886	528554
Cyprus	2005	Western Europe	Historical	26863.9	1037062	0.36727	0.58722	608984
Cyprus	2008	Western Europe	Historical	29090.5	1092390	0.38594	0.6019	657510
Cyprus	2010	Western Europe	Historical	38297	1129686	0.44292	0.57053	644520
Cyprus	2012	Western Europe	Historical	35642.9	1156556	0.43765	0.65081	752698
Cyprus	2014	Western Europe	Historical	33136.7	1176995	0.51205	0.59576	701207
Cyprus	2016	Western Europe	Historical	36509.4	1197881	0.5197	0.60226	721436
Cyprus	2018	Western Europe	Historical	39977.3	1218831	0.61405	0.7736	942888
Cyprus	2020	Western Europe	Historical	39871.9	1237537	0.84387	0.8731	1.08049e+06
Cyprus	2020	Western Europe	SSP1	28547.3	1233777	0.825123	0.8731	427882
Cyprus	2020	Western Europe	SSP2	28547.3	1233777	0.825123	0.8731	427882
Cyprus	2020	Western Europe	SSP3	28547.3	1233777	0.825123	0.8731	427882
Cyprus	2020	Western Europe	SSP4	28547.3	1233777	0.825123	0.8731	427882
Cyprus	2020	Western Europe	SSP5	28547.3	1233777	0.825123	0.8731	427882
Cyprus	2025	Western Europe	SSP1	33382.5	1285154	0.964878	0.931713	521027
Cyprus	2025	Western Europe	SSP2	33395.2	1284648	0.965245	0.931867	521019
Cyprus	2025	Western Europe	SSP3	33667.7	1274269	0.973122	0.935159	521005
Cyprus	2025	Western Europe	SSP4	33472.6	1281688	0.967483	0.932802	521017
Cyprus	2025	Western Europe	SSP5	32783.2	1308639	0.947556	0.924472	521073
Cyprus	2030	Western Europe	SSP1	37592.7	1317261	1.08657	0.98274	601259
Cyprus	2030	Western Europe	SSP2	37593.7	1315722	1.0866	0.982751	600571
Cyprus	2030	Western Europe	SSP3	38132.5	1294317	1.10217	0.98926	599226
Cyprus	2030	Western Europe	SSP4	37870.7	1307423	1.0946	0.986099	601161
Cyprus	2030	Western Europe	SSP5	36311.1	1366479	1.04953	0.967255	602564
Cyprus	2035	Western Europe	SSP1	42252.7	1345560	1.22126	1.03921	690163
Cyprus	2035	Western Europe	SSP2	41773.4	1342555	1.20741	1.0334	680823
Cyprus	2035	Western Europe	SSP3	41786.8	1309319	1.20779	1.03354	664146
Cyprus	2035	Western Europe	SSP4	42698.4	1326588	1.23414	1.0446	687573
Cyprus	2035	Western Europe	SSP5	41049.3	1422572	1.18648	1.0247	709014
Cyprus	2040	Western Europe	SSP1	47147.4	1372765	1.36274	1.09853	785541
Cyprus	2040	Western Europe	SSP2	45699.3	1368345	1.32088	1.08098	759004
Cyprus	2040	Western Europe	SSP3	44364.7	1323216	1.2823	1.06478	712531
Cyprus	2040	Western Europe	SSP4	47628.2	1341800	1.37663	1.10433	775603
Cyprus	2040	Western Europe	SSP5	47013.3	1478982	1.35886	1.09699	844046
Cyprus	2045	Western Europe	SSP1	52061.8	1400870	1.50478	1.15808	885051
Cyprus	2045	Western Europe	SSP2	49426.1	1394777	1.4286	1.12615	836662
Cyprus	2045	Western Europe	SSP3	46150.3	1336729	1.33392	1.08642	748736
Cyprus	2045	Western Europe	SSP4	52412.3	1356158	1.51491	1.16229	862511
Cyprus	2045	Western Europe	SSP5	53684.2	1537137	1.55167	1.17784	1.00152e+06
Cyprus	2050	Western Europe	SSP1	56700.7	1429034	1.63886	1.2143	983180
Cyprus	2050	Western Europe	SSP2	53022.3	1421568	1.53254	1.16973	914691
Cyprus	2050	Western Europe	SSP3	47468.3	1350606	1.37201	1.1024	778087
Cyprus	2050	Western Europe	SSP4	56801.8	1369133	1.64178	1.21547	943578
Cyprus	2050	Western Europe	SSP5	60405.1	1595768	1.74593	1.2593	1.16972e+06
Cyprus	2055	Western Europe	SSP1	61420.1	1451551	1.77527	1.27148	1.08168e+06
Cyprus	2055	Western Europe	SSP2	56827.1	1443391	1.64251	1.21584	995284
Cyprus	2055	Western Europe	SSP3	48709.2	1360020	1.40788	1.11744	803964
Cyprus	2055	Western Europe	SSP4	61147	1376352	1.76738	1.26811	1.02101e+06
Cyprus	2055	Western Europe	SSP5	67635.4	1648195	1.95491	1.34693	1.35257e+06
Cyprus	2060	Western Europe	SSP1	66525.1	1466787	1.92282	1.33334	1.18376e+06
Cyprus	2060	Western Europe	SSP2	61039.4	1459230	1.76427	1.26688	1.08068e+06
Cyprus	2060	Western Europe	SSP3	50001.4	1364591	1.44523	1.13309	828032
Cyprus	2060	Western Europe	SSP4	65762	1376881	1.90077	1.32402	1.09837e+06
Cyprus	2060	Western Europe	SSP5	75792.5	1692723	2.19069	1.44578	1.55644e+06
Cyprus	2065	Western Europe	SSP1	72112.2	1472626	2.08431	1.40102	1.28815e+06
Cyprus	2065	Western Europe	SSP2	65730.8	1466256	1.89986	1.32371	1.16922e+06
Cyprus	2065	Western Europe	SSP3	51380.4	1362986	1.48508	1.1498	849824
Cyprus	2065	Western Europe	SSP4	70758.3	1368092	2.04518	1.38454	1.17415e+06
Cyprus	2065	Western Europe	SSP5	85084.4	1724638	2.45926	1.55836	1.77995e+06
Cyprus	2070	Western Europe	SSP1	77936.8	1470263	2.25266	1.47158	1.38981e+06
Cyprus	2070	Western Europe	SSP2	70660.1	1465152	2.04234	1.38342	1.25583e+06
Cyprus	2070	Western Europe	SSP3	52610.3	1357051	1.52063	1.16469	866335
Cyprus	2070	Western Europe	SSP4	75925.5	1350234	2.19453	1.44711	1.24332e+06
Cyprus	2070	Western Europe	SSP5	95324.6	1745124	2.75524	1.68243	2.01759e+06
Cyprus	2075	Western Europe	SSP1	83881.8	1459838	2.4245	1.54358	1.48508e+06
Cyprus	2075	Western Europe	SSP2	75722.7	1456386	2.18867	1.44474	1.33762e+06
Cyprus	2075	Western Europe	SSP3	53603.1	1348925	1.54933	1.17671	877362
Cyprus	2075	Western Europe	SSP4	81170.2	1323548	2.34612	1.51063	1.30281e+06
Cyprus	2075	Western Europe	SSP5	106445	1754221	3.07666	1.81714	2.26443e+06
Cyprus	2080	Western Europe	SSP1	89960.7	1439856	2.6002	1.6172	1.57075e+06
Cyprus	2080	Western Europe	SSP2	80925.7	1439871	2.33905	1.50776	1.41318e+06
Cyprus	2080	Western Europe	SSP3	54359.3	1340900	1.57119	1.18586	884416
Cyprus	2080	Western Europe	SSP4	86510.4	1288100	2.50047	1.57529	1.35121e+06
Cyprus	2080	Western Europe	SSP5	118527	1750310	3.42587	1.96349	2.51555e+06
Cyprus	2085	Western Europe	SSP1	96297.9	1408583	2.78337	1.69394	1.64473e+06
Cyprus	2085	Western Europe	SSP2	86362.3	1417000	2.49619	1.5736	1.48403e+06
Cyprus	2085	Western Europe	SSP3	54979.5	1335265	1.58911	1.19337	890725
Cyprus	2085	Western Europe	SSP4	92020.6	1245555	2.65974	1.642	1.38967e+06
Cyprus	2085	Western Europe	SSP5	131777	1731421	3.80885	2.12398	2.76628e+06
Cyprus	2090	Western Europe	SSP1	103005	1366728	2.97723	1.77516	1.70686e+06
Cyprus	2090	Western Europe	SSP2	92125.1	1390674	2.66276	1.64338	1.55351e+06
Cyprus	2090	Western Europe	SSP3	55571.7	1333591	1.60623	1.20054	899173
Cyprus	2090	Western Europe	SSP4	97766.5	1199084	2.82582	1.71157	1.42124e+06
Cyprus	2090	Western Europe	SSP5	146409	1697952	4.23176	2.3012	3.01371e+06
Cyprus	2095	Western Europe	SSP1	110077	1318610	3.18163	1.86079	1.75968e+06
Cyprus	2095	Western Europe	SSP2	98252.9	1363848	2.83987	1.71759	1.62475e+06
Cyprus	2095	Western Europe	SSP3	56197.2	1335455	1.62431	1.20812	910551
Cyprus	2095	Western Europe	SSP4	103770	1151561	2.99934	1.78425	1.44861e+06
Cyprus	2095	Western Europe	SSP5	162529	1653512	4.69769	2.49644	3.25766e+06
Cyprus	2100	Western Europe	SSP1	117416	1268821	3.39376	1.94965	1.80598e+06
Cyprus	2100	Western Europe	SSP2	104743	1336744	3.02746	1.79619	1.69752e+06
Cyprus	2100	Western Europe	SSP3	56846	1338876	1.64306	1.21598	923410
Cyprus	2100	Western Europe	SSP4	110047	1103122	3.18077	1.86025	1.47152e+06
Cyprus	2100	Western Europe	SSP5	180149	1601653	5.20698	2.70984	3.49728e+06
Czech Republic	2003	Central and Eastern Europe	Historical	27200	10193998	1.1421	0.54168	5.52188e+06
Czech Republic	2004	Central and Eastern Europe	Historical	28500	10197101	1.13935	0.6214	6.33648e+06
Czech Republic	2005	Central and Eastern Europe	Historical	30400	10211216	1.161	0.63955	6.53058e+06
Czech Republic	2008	Central and Eastern Europe	Historical	34580.4	10384603	1.23358	0.6696	6.95353e+06
Czech Republic	2010	Central and Eastern Europe	Historical	33483.1	10474410	1.3267	0.60602	6.3477e+06
Czech Republic	2012	Central and Eastern Europe	Historical	33688.1	10510785	1.76967	0.64914	6.82297e+06
Czech Republic	2014	Central and Eastern Europe	Historical	34386.7	10525347	1.95833	0.60695	6.38836e+06
Czech Republic	2016	Central and Eastern Europe	Historical	37015	10566332	1.67003	0.64537	6.81919e+06
Czech Republic	2018	Central and Eastern Europe	Historical	39941.3	10629928	1.89906	0.7084	7.53024e+06
Czech Republic	2020	Central and Eastern Europe	Historical	38640	10697858	1.98599	0.8135	8.70271e+06
Czech Republic	2020	Central and Eastern Europe	SSP1	36777.7	10537908	1.06301	0.8135	4.7844e+06
Czech Republic	2020	Central and Eastern Europe	SSP2	36777.7	10537908	1.06301	0.8135	4.7844e+06
Czech Republic	2020	Central and Eastern Europe	SSP3	36777.7	10537908	1.06301	0.8135	4.7844e+06
Czech Republic	2020	Central and Eastern Europe	SSP4	36777.7	10537908	1.06301	0.8135	4.7844e+06
Czech Republic	2020	Central and Eastern Europe	SSP5	36777.7	10537908	1.06301	0.8135	4.7844e+06
Czech Republic	2025	Central and Eastern Europe	SSP1	39099.2	10858204	1.13011	0.84188	5.23798e+06
Czech Republic	2025	Central and Eastern Europe	SSP2	39126.1	10850736	1.13089	0.8422	5.23785e+06
Czech Republic	2025	Central and Eastern Europe	SSP3	39183.1	10834965	1.13254	0.842878	5.23758e+06
Czech Republic	2025	Central and Eastern Europe	SSP4	39220.5	10824612	1.13362	0.843323	5.23739e+06
Czech Republic	2025	Central and Eastern Europe	SSP5	38930.7	10905204	1.12524	0.839877	5.23881e+06
Czech Republic	2030	Central and Eastern Europe	SSP1	42956.4	10734965	1.2416	0.888505	5.67905e+06
Czech Republic	2030	Central and Eastern Europe	SSP2	42977.4	10712527	1.24221	0.888742	5.66971e+06
Czech Republic	2030	Central and Eastern Europe	SSP3	42972.6	10678903	1.24207	0.888656	5.651e+06
Czech Republic	2030	Central and Eastern Europe	SSP4	43318.8	10641577	1.25207	0.89282	5.67556e+06
Czech Republic	2030	Central and Eastern Europe	SSP5	42695.6	10836934	1.23406	0.885428	5.69965e+06
Czech Republic	2035	Central and Eastern Europe	SSP1	47290.4	10599186	1.36687	0.940896	6.16251e+06
Czech Republic	2035	Central and Eastern Europe	SSP2	46801.1	10556371	1.35273	0.934934	6.07469e+06
Czech Republic	2035	Central and Eastern Europe	SSP3	45806.6	10506672	1.32398	0.922847	5.91909e+06
Czech Republic	2035	Central and Eastern Europe	SSP4	47832	10423365	1.38252	0.947315	6.1272e+06
Czech Republic	2035	Central and Eastern Europe	SSP5	47860.5	10763617	1.38335	0.947935	6.33388e+06
Czech Republic	2040	Central and Eastern Europe	SSP1	52056.5	10479507	1.50463	0.998534	6.69695e+06
Czech Republic	2040	Central and Eastern Europe	SSP2	50558.6	10419177	1.46133	0.98034	6.46883e+06
Czech Republic	2040	Central and Eastern Europe	SSP3	47654.5	10365358	1.37739	0.945118	6.07032e+06
Czech Republic	2040	Central and Eastern Europe	SSP4	52600.4	10200805	1.52035	1.0049	6.58376e+06
Czech Republic	2040	Central and Eastern Europe	SSP5	54417.3	10712450	1.57286	1.02732	7.15418e+06
Czech Republic	2045	Central and Eastern Europe	SSP1	56730.7	10393348	1.63973	1.05509	7.22965e+06
Czech Republic	2045	Central and Eastern Europe	SSP2	54073.3	10318604	1.56292	1.02283	6.84487e+06
Czech Republic	2045	Central and Eastern Europe	SSP3	48608.8	10265790	1.40498	0.956597	6.12986e+06
Czech Republic	2045	Central and Eastern Europe	SSP4	57055.3	10003770	1.64911	1.0587	6.99485e+06
Czech Republic	2045	Central and Eastern Europe	SSP5	61399.8	10699325	1.77468	1.11189	8.05028e+06
Czech Republic	2050	Central and Eastern Europe	SSP1	60859.6	10329671	1.75907	1.10505	7.70147e+06
Czech Republic	2050	Central and Eastern Europe	SSP2	57355.9	10246019	1.6578	1.06254	7.20355e+06
Czech Republic	2050	Central and Eastern Europe	SSP3	49102.2	10202997	1.41924	0.962524	6.15283e+06
Czech Republic	2050	Central and Eastern Europe	SSP4	60811.6	9823701	1.75768	1.10406	7.31451e+06
Czech Republic	2050	Central and Eastern Europe	SSP5	67893.8	10711981	1.96238	1.19057	8.90258e+06
Czech Republic	2055	Central and Eastern Europe	SSP1	64894.5	10261845	1.87569	1.15387	8.15191e+06
Czech Republic	2055	Central and Eastern Europe	SSP2	60788.3	10176889	1.75701	1.10406	7.57752e+06
Czech Republic	2055	Central and Eastern Europe	SSP3	49615.9	10153909	1.43408	0.968707	6.18601e+06
Czech Republic	2055	Central and Eastern Europe	SSP4	64359.2	9638011	1.86022	1.14688	7.58899e+06
Czech Republic	2055	Central and Eastern Europe	SSP5	74543.5	10721360	2.15458	1.27113	9.77408e+06
Czech Republic	2060	Central and Eastern Europe	SSP1	68991.2	10166683	1.9941	1.20342	8.58007e+06
Czech Republic	2060	Central and Eastern Europe	SSP2	64402.7	10085363	1.86148	1.14777	7.9502e+06
Czech Republic	2060	Central and Eastern Europe	SSP3	50133.4	10096749	1.44904	0.974929	6.21402e+06
Czech Republic	2060	Central and Eastern Europe	SSP4	67897.2	9420845	1.96248	1.18957	7.8201e+06
Czech Republic	2060	Central and Eastern Europe	SSP5	81664.3	10704323	2.3604	1.35737	1.06817e+07
Czech Republic	2065	Central and Eastern Europe	SSP1	73403.3	10024978	2.12163	1.25675	8.99513e+06
Czech Republic	2065	Central and Eastern Europe	SSP2	68385.8	9951603	1.9766	1.19591	8.32384e+06
Czech Republic	2065	Central and Eastern Europe	SSP3	50758.6	10019250	1.46711	0.98244	6.24157e+06
Czech Republic	2065	Central and Eastern Europe	SSP4	71671.1	9156602	2.07156	1.23507	8.0174e+06
Czech Republic	2065	Central and Eastern Europe	SSP5	89604.8	10634090	2.58991	1.4535	1.16339e+07
Czech Republic	2070	Central and Eastern Europe	SSP1	77924.2	9841579	2.2523	1.31137	9.36808e+06
Czech Republic	2070	Central and Eastern Europe	SSP2	72522.6	9784975	2.09617	1.24589	8.67349e+06
Czech Republic	2070	Central and Eastern Europe	SSP3	51290.2	9950227	1.48248	0.988824	6.2621e+06
Czech Republic	2070	Central and Eastern Europe	SSP4	75490.1	8851292	2.18194	1.28108	8.15737e+06
Czech Republic	2070	Central and Eastern Europe	SSP5	98147.5	10514884	2.83683	1.55689	1.25906e+07
Czech Republic	2075	Central and Eastern Europe	SSP1	82296.7	9631876	2.37868	1.36417	9.677e+06
Czech Republic	2075	Central and Eastern Europe	SSP2	76547.5	9615175	2.21251	1.29451	8.99046e+06
Czech Republic	2075	Central and Eastern Europe	SSP3	51558.5	9926098	1.49023	0.992055	6.27898e+06
Czech Republic	2075	Central and Eastern Europe	SSP4	79090.3	8532323	2.286	1.32444	8.23332e+06
Czech Republic	2075	Central and Eastern Europe	SSP5	107004	10360639	3.09281	1.66405	1.35162e+07
Czech Republic	2080	Central and Eastern Europe	SSP1	86343.7	9416621	2.49565	1.41302	9.92074e+06
Czech Republic	2080	Central and Eastern Europe	SSP2	80293.3	9464674	2.32077	1.33976	9.27805e+06
Czech Republic	2080	Central and Eastern Europe	SSP3	51504.2	9960473	1.48866	0.991425	6.29445e+06
Czech Republic	2080	Central and Eastern Europe	SSP4	82317.7	8222904	2.37929	1.36328	8.25417e+06
Czech Republic	2080	Central and Eastern Europe	SSP5	115962	10190532	3.35173	1.77243	1.43987e+07
Czech Republic	2085	Central and Eastern Europe	SSP1	90030	9207519	2.6022	1.4575	1.011e+07
Czech Republic	2085	Central and Eastern Europe	SSP2	83754.1	9339462	2.4208	1.38159	9.5459e+06
Czech Republic	2085	Central and Eastern Europe	SSP3	51200.6	10043315	1.47989	0.987814	6.31053e+06
Czech Republic	2085	Central and Eastern Europe	SSP4	85163	7931641	2.46153	1.39752	8.23331e+06
Czech Republic	2085	Central and Eastern Europe	SSP5	124969	10014512	3.61207	1.88139	1.52412e+07
Czech Republic	2090	Central and Eastern Europe	SSP1	93430.8	8997387	2.7005	1.49853	1.02484e+07
Czech Republic	2090	Central and Eastern Europe	SSP2	87017.8	9230338	2.51514	1.42103	9.79847e+06
Czech Republic	2090	Central and Eastern Europe	SSP3	50747.5	10157728	1.46679	0.982418	6.32761e+06
Czech Republic	2090	Central and Eastern Europe	SSP4	87701.2	7652283	2.53489	1.42804	8.17688e+06
Czech Republic	2090	Central and Eastern Europe	SSP5	134106	9823811	3.87616	1.99192	1.60368e+07
Czech Republic	2095	Central and Eastern Europe	SSP1	96641.9	8767466	2.79331	1.53724	1.0326e+07
Czech Republic	2095	Central and Eastern Europe	SSP2	90148.3	9128555	2.60562	1.45887	1.00358e+07
Czech Republic	2095	Central and Eastern Europe	SSP3	50200.7	10284791	1.45099	0.975896	6.33969e+06
Czech Republic	2095	Central and Eastern Europe	SSP4	90003.9	7378619	2.60145	1.45571	8.08865e+06
Czech Republic	2095	Central and Eastern Europe	SSP5	143488	9597251	4.14734	2.10539	1.67559e+07
Czech Republic	2100	Central and Eastern Europe	SSP1	99648.9	8511978	2.88022	1.57346	1.03334e+07
Czech Republic	2100	Central and Eastern Europe	SSP2	93128.9	9021377	2.69177	1.49489	1.0243e+07
Czech Republic	2100	Central and Eastern Europe	SSP3	49539.9	10408172	1.43189	0.967991	6.33347e+06
Czech Republic	2100	Central and Eastern Europe	SSP4	92087.9	7099346	2.66168	1.48073	7.96012e+06
Czech Republic	2100	Central and Eastern Europe	SSP5	153094	9325646	4.42499	2.22153	1.73648e+07
Denmark	2003	Western Europe	Historical	49300	5390574	2.51085	0.82046	4.42275e+06
Denmark	2004	Western Europe	Historical	50400	5404523	2.41916	0.90466	4.88926e+06
Denmark	2005	Western Europe	Historical	51500	5419432	2.39337	0.90576	4.9087e+06
Denmark	2008	Western Europe	Historical	52982.5	5493621	2.77346	0.9134	5.01787e+06
Denmark	2010	Western Europe	Historical	50825.4	5547683	2.91707	0.78722	4.36725e+06
Denmark	2012	Western Europe	Historical	51216.3	5591572	2.98125	0.88885	4.97007e+06
Denmark	2014	Western Europe	Historical	52048.3	5643475	2.91409	0.8162	4.6062e+06
Denmark	2016	Western Europe	Historical	54185	5728010	3.09283	0.85102	4.87465e+06
Denmark	2018	Western Europe	Historical	56178.8	5793636	2.96603	0.915	5.30118e+06
Denmark	2020	Western Europe	Historical	55275.1	5831404	2.96873	0.9758	5.69028e+06
Denmark	2020	Western Europe	SSP1	51436.4	5810771	1.4867	0.9758	3.64783e+06
Denmark	2020	Western Europe	SSP2	51436.4	5810771	1.4867	0.9758	3.64783e+06
Denmark	2020	Western Europe	SSP3	51436.4	5810771	1.4867	0.9758	3.64783e+06
Denmark	2020	Western Europe	SSP4	51436.4	5810771	1.4867	0.9758	3.64783e+06
Denmark	2020	Western Europe	SSP5	51436.4	5810771	1.4867	0.9758	3.64783e+06
Denmark	2025	Western Europe	SSP1	57753.2	5907447	1.66928	1.0524	4.16102e+06
Denmark	2025	Western Europe	SSP2	57792.6	5903406	1.67042	1.05287	4.16097e+06
Denmark	2025	Western Europe	SSP3	57938.2	5888576	1.67463	1.05462	4.16083e+06
Denmark	2025	Western Europe	SSP4	57945.8	5887806	1.67485	1.05471	4.16083e+06
Denmark	2025	Western Europe	SSP5	57371.7	5946723	1.65826	1.04781	4.16139e+06
Denmark	2030	Western Europe	SSP1	61110	5975479	1.76631	1.09312	4.45225e+06
Denmark	2030	Western Europe	SSP2	61142	5965484	1.76723	1.09349	4.44706e+06
Denmark	2030	Western Europe	SSP3	61269.9	5938503	1.77093	1.09502	4.43602e+06
Denmark	2030	Western Europe	SSP4	61690.7	5917352	1.78309	1.1001	4.45028e+06
Denmark	2030	Western Europe	SSP5	60393.1	6061019	1.74559	1.0845	4.46376e+06
Denmark	2035	Western Europe	SSP1	64976.8	6035490	1.87807	1.14	4.77996e+06
Denmark	2035	Western Europe	SSP2	64463.6	6019892	1.86324	1.13378	4.73011e+06
Denmark	2035	Western Europe	SSP3	63482.1	5985184	1.83487	1.12186	4.63151e+06
Denmark	2035	Western Europe	SSP4	65867.5	5922633	1.90382	1.1507	4.75394e+06
Denmark	2035	Western Europe	SSP5	64969.8	6174032	1.87787	1.14003	4.88985e+06
Denmark	2040	Western Europe	SSP1	69485.2	6084258	2.00838	1.19466	5.1511e+06
Denmark	2040	Western Europe	SSP2	67936.2	6066407	1.96361	1.17588	5.02207e+06
Denmark	2040	Western Europe	SSP3	64863.5	6030759	1.8748	1.13863	4.76791e+06
Denmark	2040	Western Europe	SSP4	70410.6	5904056	2.03513	1.20572	5.06386e+06
Denmark	2040	Western Europe	SSP5	71369.7	6281357	2.06285	1.21764	5.46236e+06
Denmark	2045	Western Europe	SSP1	74436	6132168	2.15148	1.25467	5.55966e+06
Denmark	2045	Western Europe	SSP2	71709.8	6112498	2.07268	1.22163	5.33987e+06
Denmark	2045	Western Europe	SSP3	65893	6074130	1.90455	1.15113	4.87816e+06
Denmark	2045	Western Europe	SSP4	75031.5	5880772	2.16869	1.26168	5.37296e+06
Denmark	2045	Western Europe	SSP5	78984.5	6392196	2.28295	1.30998	6.14895e+06
Denmark	2050	Western Europe	SSP1	79160.6	6188542	2.28804	1.31194	5.96523e+06
Denmark	2050	Western Europe	SSP2	75510.4	6170291	2.18253	1.26771	5.67472e+06
Denmark	2050	Western Europe	SSP3	66538.4	6133902	1.92321	1.159	4.97442e+06
Denmark	2050	Western Europe	SSP4	79169.6	5860733	2.2883	1.31179	5.64834e+06
Denmark	2050	Western Europe	SSP5	86651	6514644	2.50454	1.40294	6.87239e+06
Denmark	2055	Western Europe	SSP1	83679.6	6237931	2.41865	1.36673	6.35456e+06
Denmark	2055	Western Europe	SSP2	79298.6	6226603	2.29202	1.31365	6.01252e+06
Denmark	2055	Western Europe	SSP3	66841.2	6204166	1.93196	1.16273	5.05451e+06
Denmark	2055	Western Europe	SSP4	82924.3	5830027	2.39682	1.35725	5.88377e+06
Denmark	2055	Western Europe	SSP5	94505.5	6630156	2.73156	1.49818	7.6257e+06
Denmark	2060	Western Europe	SSP1	88182.2	6277437	2.54879	1.4213	6.73739e+06
Denmark	2060	Western Europe	SSP2	83070	6284472	2.40103	1.35938	6.3558e+06
Denmark	2060	Western Europe	SSP3	66706	6297567	1.92805	1.16116	5.12076e+06
Denmark	2060	Western Europe	SSP4	86572.8	5788167	2.50228	1.40141	6.09714e+06
Denmark	2060	Western Europe	SSP5	102863	6735253	2.97312	1.59951	8.42902e+06
Denmark	2065	Western Europe	SSP1	92798.3	6305039	2.68222	1.47724	7.11972e+06
Denmark	2065	Western Europe	SSP2	86930.4	6341729	2.51261	1.40619	6.71056e+06
Denmark	2065	Western Europe	SSP3	66303.3	6412962	1.91641	1.15638	5.18391e+06
Denmark	2065	Western Europe	SSP4	90245.9	5735614	2.60844	1.44586	6.29675e+06
Denmark	2065	Western Europe	SSP5	111900	6823114	3.23433	1.70905	9.28639e+06
Denmark	2070	Western Europe	SSP1	97113	6326722	2.80693	1.52952	7.47499e+06
Denmark	2070	Western Europe	SSP2	90536.9	6401049	2.61685	1.44992	7.05329e+06
Denmark	2070	Western Europe	SSP3	65525.3	6547676	1.89392	1.14706	5.23181e+06
Denmark	2070	Western Europe	SSP4	93551	5676645	2.70397	1.48585	6.45901e+06
Denmark	2070	Western Europe	SSP5	121098	6899746	3.50018	1.82053	1.01599e+07
Denmark	2075	Western Europe	SSP1	100987	6346957	2.9189	1.57647	7.79686e+06
Denmark	2075	Western Europe	SSP2	93840.3	6461122	2.71233	1.48999	7.37834e+06
Denmark	2075	Western Europe	SSP3	64514.1	6693902	1.8647	1.13493	5.26744e+06
Denmark	2075	Western Europe	SSP4	96368.4	5611707	2.78541	1.51993	6.57635e+06
Denmark	2075	Western Europe	SSP5	130254	6968995	3.76482	1.9315	1.10352e+07
Denmark	2080	Western Europe	SSP1	104504	6363778	3.02055	1.61909	8.08872e+06
Denmark	2080	Western Europe	SSP2	96930.6	6516047	2.80165	1.52747	7.68528e+06
Denmark	2080	Western Europe	SSP3	63370.3	6844401	1.83164	1.1212	5.29187e+06
Denmark	2080	Western Europe	SSP4	98816.1	5535173	2.85615	1.54952	6.65044e+06
Denmark	2080	Western Europe	SSP5	139452	7027644	4.03068	2.04297	1.19114e+07
Denmark	2085	Western Europe	SSP1	107701	6366460	3.11296	1.65782	8.3387e+06
Denmark	2085	Western Europe	SSP2	99812	6555937	2.88494	1.5624	7.96137e+06
Denmark	2085	Western Europe	SSP3	62062.5	6998022	1.79384	1.10548	5.30065e+06
Denmark	2085	Western Europe	SSP4	100953	5436209	2.91792	1.57532	6.67182e+06
Denmark	2085	Western Europe	SSP5	148736	7063650	4.29902	2.15546	1.27671e+07
Denmark	2090	Western Europe	SSP1	110655	6336620	3.19834	1.69357	8.52621e+06
Denmark	2090	Western Europe	SSP2	102467	6577225	2.96168	1.59458	8.19887e+06
Denmark	2090	Western Europe	SSP3	60548.7	7161637	1.75008	1.08727	5.2942e+06
Denmark	2090	Western Europe	SSP4	102820	5310406	2.97188	1.59784	6.63698e+06
Denmark	2090	Western Europe	SSP5	158188	7058242	4.57222	2.26995	1.35654e+07
Denmark	2095	Western Europe	SSP1	113463	6243068	3.2795	1.72751	8.61222e+06
Denmark	2095	Western Europe	SSP2	104847	6586453	3.03047	1.62342	8.40031e+06
Denmark	2095	Western Europe	SSP3	58833.5	7343698	1.70051	1.06664	5.27729e+06
Denmark	2095	Western Europe	SSP4	104395	5164880	3.0174	1.6168	6.55304e+06
Denmark	2095	Western Europe	SSP5	167923	6978724	4.8536	2.38781	1.42351e+07
Denmark	2100	Western Europe	SSP1	116028	6098370	3.35364	1.75847	8.60138e+06
Denmark	2100	Western Europe	SSP2	106913	6591498	3.09018	1.64845	8.57173e+06
Denmark	2100	Western Europe	SSP3	56978.6	7544495	1.64689	1.04434	5.25328e+06
Denmark	2100	Western Europe	SSP4	105633	5009546	3.05319	1.63167	6.43045e+06
Denmark	2100	Western Europe	SSP5	177784	6836726	5.13862	2.50715	1.47613e+07
Egypt	2003	Middle East and North Africa	Historical	8090	75963322	0.269865	0.23841	1.81104e+07
Egypt	2004	Middle East and North Africa	Historical	8250	77522427	0.26994	0.2653	2.05667e+07
Egypt	2005	Middle East and North Africa	Historical	8450	79075310	0.24141	0.37929	2.99925e+07
Egypt	2008	Middle East and North Africa	Historical	9770.22	83844783	0.27024	0.4767	3.99688e+07
Egypt	2010	Middle East and North Africa	Historical	10333.3	87252413	0.43345	0.4518	3.94206e+07
Egypt	2012	Middle East and North Africa	Historical	10279.9	91240376	0.50899	0.46112	4.20728e+07
Egypt	2014	Middle East and North Africa	Historical	10318.7	95592324	0.63649	0.51293	4.90322e+07
Egypt	2016	Middle East and North Africa	Historical	10765.8	99784030	0.70848	0.45941	4.58418e+07
Egypt	2018	Middle East and North Africa	Historical	11363.3	103740765	0.68839	0.488	5.06255e+07
Egypt	2020	Middle East and North Africa	Historical	11989.6	107465134	0.91564	0.5527	5.9396e+07
Egypt	2020	Middle East and North Africa	SSP1	12095.7	106538717	0.349611	0.5527	2.47741e+07
Egypt	2020	Middle East and North Africa	SSP2	12095.7	106538717	0.349611	0.5527	2.47741e+07
Egypt	2020	Middle East and North Africa	SSP3	12095.7	106538717	0.349611	0.5527	2.47741e+07
Egypt	2020	Middle East and North Africa	SSP4	12095.7	106538717	0.349611	0.5527	2.47741e+07
Egypt	2020	Middle East and North Africa	SSP5	12095.7	106538717	0.349611	0.5527	2.47741e+07
Egypt	2025	Middle East and North Africa	SSP1	13933.7	115442833	0.402736	0.582153	3.02448e+07
Egypt	2025	Middle East and North Africa	SSP2	13866.2	116005325	0.400785	0.58179	3.035e+07
Egypt	2025	Middle East and North Africa	SSP3	13801.5	116548555	0.398915	0.581445	3.04519e+07
Egypt	2025	Middle East and North Africa	SSP4	13802.6	116539581	0.398946	0.581451	3.04502e+07
Egypt	2025	Middle East and North Africa	SSP5	13936.1	115423330	0.402805	0.582167	3.02412e+07
Egypt	2030	Middle East and North Africa	SSP1	17308.6	123879520	0.500283	0.629847	3.83633e+07
Egypt	2030	Middle East and North Africa	SSP2	17028.4	125575277	0.492184	0.627822	3.86342e+07
Egypt	2030	Middle East and North Africa	SSP3	16769.1	127198878	0.484689	0.625992	3.89009e+07
Egypt	2030	Middle East and North Africa	SSP4	16785.9	127183179	0.485175	0.626182	38920352
Egypt	2030	Middle East and North Africa	SSP5	17366.6	123824680	0.501959	0.630505	3.84279e+07
Egypt	2035	Middle East and North Africa	SSP1	22099	131831456	0.638743	0.694296	4.93223e+07
Egypt	2035	Middle East and North Africa	SSP2	20872.7	135248205	0.603299	0.682199	4.89646e+07
Egypt	2035	Middle East and North Africa	SSP3	19720.5	138604953	0.569996	0.670952	4.86209e+07
Egypt	2035	Middle East and North Africa	SSP4	19985.9	138597365	0.577667	0.674161	4.9063e+07
Egypt	2035	Middle East and North Africa	SSP5	22940.2	131727572	0.663057	0.704402	5.06147e+07
Egypt	2040	Middle East and North Africa	SSP1	28349.6	139245789	0.819409	0.775999	6.34731e+07
Egypt	2040	Middle East and North Africa	SSP2	25201.2	145029721	0.728408	0.74253	6.12556e+07
Egypt	2040	Middle East and North Africa	SSP3	22175	150883982	0.64094	0.710598	5.89103e+07
Egypt	2040	Middle East and North Africa	SSP4	23028.7	150896997	0.665615	0.72095	6.04774e+07
Egypt	2040	Middle East and North Africa	SSP5	31095.2	139080733	0.898767	0.809125	6.8005e+07
Egypt	2045	Middle East and North Africa	SSP1	35864.3	146122766	1.03661	0.872581	8.07207e+07
Egypt	2045	Middle East and North Africa	SSP2	30065.8	154453769	0.869013	0.809066	7.55128e+07
Egypt	2045	Middle East and North Africa	SSP3	24184.6	163164940	0.699025	0.744857	6.92949e+07
Egypt	2045	Middle East and North Africa	SSP4	25969.3	163195961	0.750609	0.766501	7.28404e+07
Egypt	2045	Middle East and North Africa	SSP5	41383.3	145884887	1.19613	0.939244	9.03144e+07
Egypt	2050	Middle East and North Africa	SSP1	44192	151995350	1.27731	0.978201	1.00018e+08
Egypt	2050	Middle East and North Africa	SSP2	35587.5	163109902	1.02861	0.882943	9.17947e+07
Egypt	2050	Middle East and North Africa	SSP3	26102.3	175154680	0.754454	0.777767	8.01512e+07
Egypt	2050	Middle East and North Africa	SSP4	29128	175174961	0.841907	0.814435	8.65839e+07
Egypt	2050	Middle East and North Africa	SSP5	52843.6	151674310	1.52738	1.08274	1.15664e+08
Egypt	2055	Middle East and North Africa	SSP1	53282.5	156699872	1.54006	1.09212	120964974
Egypt	2055	Middle East and North Africa	SSP2	41873.1	170865632	1.21029	0.965345	1.10239e+08
Egypt	2055	Middle East and North Africa	SSP3	28064.3	186835453	0.811163	0.810964	9.16988e+07
Egypt	2055	Middle East and North Africa	SSP4	32656.7	186819829	0.9439	0.866582	1.02082e+08
Egypt	2055	Middle East and North Africa	SSP5	65569.5	156287638	1.8952	1.24062	1.43857e+08
Egypt	2060	Middle East and North Africa	SSP1	63218.5	160225685	1.82725	1.21532	1.43428e+08
Egypt	2060	Middle East and North Africa	SSP2	48906.2	177736816	1.41357	1.05609	1.30801e+08
Egypt	2060	Middle East and North Africa	SSP3	29958.3	198309351	0.865906	0.843171	103717067
Egypt	2060	Middle East and North Africa	SSP4	36454.4	198237407	1.05367	0.921804	119267451
Egypt	2060	Middle East and North Africa	SSP5	79927.1	159716289	2.31019	1.41731	1.75233e+08
Egypt	2065	Middle East and North Africa	SSP1	73907.8	162614032	2.13621	1.34674	166935426
Egypt	2065	Middle East and North Africa	SSP2	56657.1	183488565	1.6376	1.15462	1.53114e+08
Egypt	2065	Middle East and North Africa	SSP3	31791.7	208975181	0.918898	0.873991	1.15736e+08
Egypt	2065	Middle East and North Africa	SSP4	40547.6	208832123	1.17198	0.979941	1.37783e+08
Egypt	2065	Middle East and North Africa	SSP5	96033	162012876	2.77571	1.61427	2.09662e+08
Egypt	2070	Middle East and North Africa	SSP1	84875.6	163990047	2.45322	1.48071	1.90318e+08
Egypt	2070	Middle East and North Africa	SSP2	64845.3	188169675	1.87427	1.25759	1.76395e+08
Egypt	2070	Middle East and North Africa	SSP3	33461	218822460	0.967147	0.902162	1.27354e+08
Egypt	2070	Middle East and North Africa	SSP4	44819.9	218589340	1.29546	1.03957	1.57255e+08
Egypt	2070	Middle East and North Africa	SSP5	113447	163305681	3.27904	1.82626	2.45954e+08
Egypt	2075	Middle East and North Africa	SSP1	96184.1	164551937	2.78008	1.61815	213585978
Egypt	2075	Middle East and North Africa	SSP2	73510.6	192031397	2.12473	1.36568	2.00771e+08
Egypt	2075	Middle East and North Africa	SSP3	34999.2	228277124	1.01161	0.928428	1.38853e+08
Egypt	2075	Middle East and North Africa	SSP4	49321.1	227932263	1.42556	1.10164	1.78123e+08
Egypt	2075	Middle East and North Africa	SSP5	132377	163795009	3.82619	2.05596	2.84315e+08
Egypt	2080	Middle East and North Africa	SSP1	107839	164406404	3.11695	1.75921	2.36589e+08
Egypt	2080	Middle East and North Africa	SSP2	82596.2	195189170	2.38734	1.47829	226052799
Egypt	2080	Middle East and North Africa	SSP3	36353.3	237530446	1.05075	0.952302	1.50152e+08
Egypt	2080	Middle East and North Africa	SSP4	53981.3	237053867	1.56026	1.16546	2.0038e+08
Egypt	2080	Middle East and North Africa	SSP5	152951	163589324	4.42085	2.30502	3.24702e+08
Egypt	2085	Middle East and North Africa	SSP1	119927	163595499	3.46634	1.90499	259270223
Egypt	2085	Middle East and North Africa	SSP2	92147	197617954	2.66339	1.59594	2.52116e+08
Egypt	2085	Middle East and North Africa	SSP3	37546.8	246418422	1.08524	0.973935	1.61101e+08
Egypt	2085	Middle East and North Africa	SSP4	58829.4	245796059	1.70039	1.23124	2.23939e+08
Egypt	2085	Middle East and North Africa	SSP5	175414	162732383	5.07012	2.57644	3.67169e+08
Egypt	2090	Middle East and North Africa	SSP1	132500	162269721	3.82974	2.05622	2.8171e+08
Egypt	2090	Middle East and North Africa	SSP2	102195	199496190	2.95382	1.71918	2.79097e+08
Egypt	2090	Middle East and North Africa	SSP3	38606.9	255043435	1.11588	0.99374	1.71791e+08
Egypt	2090	Middle East and North Africa	SSP4	63909.2	254255497	1.84721	1.29961	249028425
Egypt	2090	Middle East and North Africa	SSP5	199982	161375707	5.78022	2.87295	4.11958e+08
Egypt	2095	Middle East and North Africa	SSP1	145694	160361608	4.2111	2.21451	3.0378e+08
Egypt	2095	Middle East and North Africa	SSP2	112908	200615357	3.26346	1.84985	306878767
Egypt	2095	Middle East and North Africa	SSP3	39614.9	263008949	1.14502	1.01238	1.82059e+08
Egypt	2095	Middle East and North Africa	SSP4	69359.1	262062325	2.00474	1.37193	2.75627e+08
Egypt	2095	Middle East and North Africa	SSP5	227016	159453659	6.56161	3.19888	4.59021e+08
Egypt	2100	Middle East and North Africa	SSP1	159503	157840698	4.61023	2.37975	3.25087e+08
Egypt	2100	Middle East and North Africa	SSP2	124272	200998176	3.59192	1.98782	3.35196e+08
Egypt	2100	Middle East and North Africa	SSP3	40554.4	270389021	1.17217	1.02972	1.91856e+08
Egypt	2100	Middle East and North Africa	SSP4	75174.8	269284581	2.17283	1.44821	3.03764e+08
Egypt	2100	Middle East and North Africa	SSP5	256687	156937223	7.41921	3.55627	507865296
Estonia	2003	Central and Eastern Europe	Historical	22049.7	1370720	0.76465	0.6968	955118
Estonia	2004	Central and Eastern Europe	Historical	23691.2	1362550	0.84584	0.70289	957723
Estonia	2005	Central and Eastern Europe	Historical	26097	1354775	0.91705	0.73473	995394
Estonia	2008	Central and Eastern Europe	Historical	29621.8	1337090	1.25188	0.76	1.01619e+06
Estonia	2010	Central and Eastern Europe	Historical	26015.7	1331475	1.57899	0.69653	927412
Estonia	2012	Central and Eastern Europe	Historical	28997.3	1322696	2.12481	0.79873	1.05648e+06
Estonia	2014	Central and Eastern Europe	Historical	30494.1	1314545	1.43023	0.81796	1.07525e+06
Estonia	2016	Central and Eastern Europe	Historical	32008.9	1315790	1.24306	0.83344	1.09663e+06
Estonia	2018	Central and Eastern Europe	Historical	34979.9	1321977	1.40999	0.8486	1.12183e+06
Estonia	2020	Central and Eastern Europe	Historical	35883.3	1329522	1.75092	0.9473	1.25946e+06
Estonia	2020	Central and Eastern Europe	SSP1	33632.8	1329091	0.972113	0.9473	542917
Estonia	2020	Central and Eastern Europe	SSP2	33632.8	1329091	0.972113	0.9473	542917
Estonia	2020	Central and Eastern Europe	SSP3	33632.8	1329091	0.972113	0.9473	542917
Estonia	2020	Central and Eastern Europe	SSP4	33632.8	1329091	0.972113	0.9473	542917
Estonia	2020	Central and Eastern Europe	SSP5	33632.8	1329091	0.972113	0.9473	542917
Estonia	2025	Central and Eastern Europe	SSP1	35551.7	1349108	1.02758	0.970561	582475
Estonia	2025	Central and Eastern Europe	SSP2	35591	1347619	1.02871	0.971036	582472
Estonia	2025	Central and Eastern Europe	SSP3	35511.4	1350642	1.02641	0.970074	582479
Estonia	2025	Central and Eastern Europe	SSP4	35673.1	1344521	1.03109	0.972028	582467
Estonia	2025	Central and Eastern Europe	SSP5	35681	1344221	1.03131	0.972123	582465
Estonia	2030	Central and Eastern Europe	SSP1	43270.8	1315588	1.25069	1.06404	690982
Estonia	2030	Central and Eastern Europe	SSP2	43253.8	1312066	1.2502	1.06383	688859
Estonia	2030	Central and Eastern Europe	SSP3	42801.6	1317960	1.23713	1.05836	684740
Estonia	2030	Central and Eastern Europe	SSP4	43661.9	1303443	1.26199	1.06877	690766
Estonia	2030	Central and Eastern Europe	SSP5	43823.5	1307458	1.26666	1.07073	695457
Estonia	2035	Central and Eastern Europe	SSP1	49571.3	1285628	1.43279	1.14034	773337
Estonia	2035	Central and Eastern Europe	SSP2	48782.6	1279828	1.41	1.13078	757615
Estonia	2035	Central and Eastern Europe	SSP3	46714.7	1289216	1.35023	1.10574	730887
Estonia	2035	Central and Eastern Europe	SSP4	50203.7	1263225	1.45107	1.14798	769515
Estonia	2035	Central and Eastern Europe	SSP5	51749.8	1276194	1.49576	1.16672	801330
Estonia	2040	Central and Eastern Europe	SSP1	54923.5	1260861	1.58749	1.20515	840161
Estonia	2040	Central and Eastern Europe	SSP2	53119.9	1253150	1.53536	1.1833	807636
Estonia	2040	Central and Eastern Europe	SSP3	48671.5	1267131	1.40679	1.12942	748380
Estonia	2040	Central and Eastern Europe	SSP4	55616	1225662	1.60751	1.21351	826953
Estonia	2040	Central and Eastern Europe	SSP5	59248.7	1251755	1.71251	1.25754	899668
Estonia	2045	Central and Eastern Europe	SSP1	58776.4	1241575	1.69886	1.25181	885238
Estonia	2045	Central and Eastern Europe	SSP2	56293.1	1231969	1.62708	1.22172	841320
Estonia	2045	Central and Eastern Europe	SSP3	49286.4	1250023	1.42456	1.13686	747570
Estonia	2045	Central and Eastern Europe	SSP4	59293.4	1192519	1.7138	1.25803	857682
Estonia	2045	Central and Eastern Europe	SSP5	65130.4	1234173	1.88251	1.32877	974947
Estonia	2050	Central and Eastern Europe	SSP1	61495.1	1224930	1.77744	1.28473	913695
Estonia	2050	Central and Eastern Europe	SSP2	58856.9	1214035	1.70118	1.25276	866759
Estonia	2050	Central and Eastern Europe	SSP3	49467.3	1236276	1.42979	1.13904	742044
Estonia	2050	Central and Eastern Europe	SSP4	61691.5	1161709	1.78311	1.28706	869242
Estonia	2050	Central and Eastern Europe	SSP5	69706.6	1220424	2.01478	1.3842	1.03173e+06
Estonia	2055	Central and Eastern Europe	SSP1	63922.8	1207296	1.84761	1.31412	936028
Estonia	2055	Central and Eastern Europe	SSP2	61308.8	1196167	1.77205	1.28245	889513
Estonia	2055	Central and Eastern Europe	SSP3	49589.9	1223548	1.43333	1.14051	736209
Estonia	2055	Central and Eastern Europe	SSP4	63705	1130417	1.84131	1.31142	873371
Estonia	2055	Central and Eastern Europe	SSP5	74218	1206195	2.14518	1.43883	1.0856e+06
Estonia	2060	Central and Eastern Europe	SSP1	66664.8	1187262	1.92686	1.34732	959912
Estonia	2060	Central and Eastern Europe	SSP2	64023.7	1177536	1.85052	1.31532	914366
Estonia	2060	Central and Eastern Europe	SSP3	49764.2	1211619	1.43837	1.14261	731577
Estonia	2060	Central and Eastern Europe	SSP4	65964.9	1097909	1.90663	1.33877	878282
Estonia	2060	Central and Eastern Europe	SSP5	79445.8	1190207	2.29628	1.50215	1.14657e+06
Estonia	2065	Central and Eastern Europe	SSP1	69586.9	1165300	2.01132	1.3827	983383
Estonia	2065	Central and Eastern Europe	SSP2	66854.5	1158096	1.93234	1.3496	938965
Estonia	2065	Central and Eastern Europe	SSP3	49780.4	1200844	1.43884	1.1428	725297
Estonia	2065	Central and Eastern Europe	SSP4	68345	1064169	1.97542	1.36758	881944
Estonia	2065	Central and Eastern Europe	SSP5	85242.7	1172402	2.46383	1.57235	1.21173e+06
Estonia	2070	Central and Eastern Europe	SSP1	72324.9	1141903	2.09046	1.41585	1.00149e+06
Estonia	2070	Central and Eastern Europe	SSP2	69466.2	1138543	2.00783	1.38122	959114
Estonia	2070	Central and Eastern Europe	SSP3	49394.9	1192572	1.4277	1.13813	714724
Estonia	2070	Central and Eastern Europe	SSP4	70507	1029387	2.03791	1.39374	880048
Estonia	2070	Central and Eastern Europe	SSP5	91172	1153039	2.63521	1.64416	1.27451e+06
Estonia	2075	Central and Eastern Europe	SSP1	74730	1117728	2.15997	1.44496	1.01283e+06
Estonia	2075	Central and Eastern Europe	SSP2	71738	1119557	2.07349	1.40872	973913
Estonia	2075	Central and Eastern Europe	SSP3	48600.3	1187876	1.40473	1.1285	700471
Estonia	2075	Central and Eastern Europe	SSP4	72330.6	994054	2.09062	1.4158	871772
Estonia	2075	Central and Eastern Europe	SSP5	97029.9	1132541	2.80452	1.71511	1.3322e+06
Estonia	2080	Central and Eastern Europe	SSP1	76752.6	1093053	2.21844	1.46945	1.01723e+06
Estonia	2080	Central and Eastern Europe	SSP2	73643.6	1101276	2.12857	1.43179	983415
Estonia	2080	Central and Eastern Europe	SSP3	47470.9	1187202	1.37209	1.11481	683830
Estonia	2080	Central and Eastern Europe	SSP4	73791.7	958475	2.13285	1.43347	857506
Estonia	2080	Central and Eastern Europe	SSP5	102726	1111038	2.96916	1.78409	1.38355e+06
Estonia	2085	Central and Eastern Europe	SSP1	78439.3	1067711	2.26719	1.48986	1.01544e+06
Estonia	2085	Central and Eastern Europe	SSP2	75246.9	1083918	2.17492	1.4512	988951
Estonia	2085	Central and Eastern Europe	SSP3	46136.4	1190465	1.33351	1.09865	666469
Estonia	2085	Central and Eastern Europe	SSP4	74933.2	923126	2.16585	1.44727	838619
Estonia	2085	Central and Eastern Europe	SSP5	108291	1088200	3.13001	1.85148	1.42845e+06
Estonia	2090	Central and Eastern Europe	SSP1	79871.1	1041785	2.30857	1.50718	1.00883e+06
Estonia	2090	Central and Eastern Europe	SSP2	76642.5	1067527	2.21525	1.46809	992029
Estonia	2090	Central and Eastern Europe	SSP3	44707.6	1196828	1.29222	1.08135	649322
Estonia	2090	Central and Eastern Europe	SSP4	75824.1	888399	2.1916	1.45803	816634
Estonia	2090	Central and Eastern Europe	SSP5	113801	1063875	3.28927	1.91821	1.46751e+06
Estonia	2095	Central and Eastern Europe	SSP1	81079	1016029	2.34348	1.52179	998735
Estonia	2095	Central and Eastern Europe	SSP2	77878.5	1051895	2.25098	1.48305	993239
Estonia	2095	Central and Eastern Europe	SSP3	43229.5	1204810	1.24949	1.06345	632088
Estonia	2095	Central and Eastern Europe	SSP4	76516.2	854277	2.2116	1.46639	792407
Estonia	2095	Central and Eastern Europe	SSP5	119278	1038379	3.44758	1.98454	1.50121e+06
Estonia	2100	Central and Eastern Europe	SSP1	82053.2	990452	2.37164	1.53357	985261
Estonia	2100	Central and Eastern Europe	SSP2	78953.3	1035654	2.28204	1.49606	991374
Estonia	2100	Central and Eastern Europe	SSP3	41691.8	1213007	1.20505	1.04483	613802
Estonia	2100	Central and Eastern Europe	SSP4	77045.4	819378	2.2269	1.47277	765265
Estonia	2100	Central and Eastern Europe	SSP5	124687	1011432	3.60392	2.05004	1.5285e+06
Finland	2003	Western Europe	Historical	42200	5213014	3.29822	0.76112	3.96773e+06
Finland	2004	Western Europe	Historical	43700	5228172	3.30907	0.82389	4.30744e+06
Finland	2005	Western Europe	Historical	44800	5246096	3.3237	0.82311	4.31811e+06
Finland	2008	Western Europe	Historical	48818	5313399	3.53697	0.7488	3.97867e+06
Finland	2010	Western Europe	Historical	45874.7	5363352	3.70532	0.6967	3.73665e+06
Finland	2012	Western Europe	Historical	45952.2	5413971	3.39832	0.85052	4.60469e+06
Finland	2014	Western Europe	Historical	44976.8	5461512	3.14751	0.84491	4.61449e+06
Finland	2016	Western Europe	Historical	46206.8	5495303	2.72442	0.88168	4.8451e+06
Finland	2018	Western Europe	Historical	48048.5	5515525	2.75749	0.8815	4.86194e+06
Finland	2020	Western Europe	Historical	47371.2	5529543	2.91243	0.9452	5.22652e+06
Finland	2020	Western Europe	SSP1	44698.9	5525213	1.29196	0.9452	3.01635e+06
Finland	2020	Western Europe	SSP2	44698.9	5525213	1.29196	0.9452	3.01635e+06
Finland	2020	Western Europe	SSP3	44698.9	5525213	1.29196	0.9452	3.01635e+06
Finland	2020	Western Europe	SSP4	44698.9	5525213	1.29196	0.9452	3.01635e+06
Finland	2020	Western Europe	SSP5	44698.9	5525213	1.29196	0.9452	3.01635e+06
Finland	2025	Western Europe	SSP1	47958.5	5542036	1.38618	0.984699	3.24444e+06
Finland	2025	Western Europe	SSP2	48005.3	5536631	1.38753	0.985262	3.24439e+06
Finland	2025	Western Europe	SSP3	48133.7	5521861	1.39124	0.986805	3.24426e+06
Finland	2025	Western Europe	SSP4	48105.3	5525132	1.39042	0.986464	3.2443e+06
Finland	2025	Western Europe	SSP5	47681.5	5574233	1.37817	0.98137	3.24473e+06
Finland	2030	Western Europe	SSP1	51765.7	5528770	1.49622	1.03081	3.4916e+06
Finland	2030	Western Europe	SSP2	51835.4	5514054	1.49824	1.03164	3.48689e+06
Finland	2030	Western Europe	SSP3	52011.1	5483285	1.50331	1.03374	3.47897e+06
Finland	2030	Western Europe	SSP4	52221.3	5478742	1.50939	1.03629	3.49002e+06
Finland	2030	Western Europe	SSP5	51238	5597862	1.48097	1.02447	3.49976e+06
Finland	2035	Western Europe	SSP1	55543.7	5518629	1.60542	1.07656	3.73771e+06
Finland	2035	Western Europe	SSP2	55114.5	5493576	1.59301	1.07134	3.69207e+06
Finland	2035	Western Europe	SSP3	54463.5	5449538	1.5742	1.06342	3.6193e+06
Finland	2035	Western Europe	SSP4	56246.9	5421182	1.62574	1.085	3.71746e+06
Finland	2035	Western Europe	SSP5	55640.1	5629262	1.60821	1.07782	3.81972e+06
Finland	2040	Western Europe	SSP1	59955.6	5509640	1.73294	1.13	4.02604e+06
Finland	2040	Western Europe	SSP2	58464.2	5476837	1.68983	1.11191	3.90298e+06
Finland	2040	Western Europe	SSP3	56066.6	5427277	1.62053	1.08282	3.70981e+06
Finland	2040	Western Europe	SSP4	60678.9	5352266	1.75385	1.13864	3.95726e+06
Finland	2040	Western Europe	SSP5	61750.2	5665810	1.78481	1.15187	4.26404e+06
Finland	2045	Western Europe	SSP1	64631.3	5504305	1.86808	1.18664	4.33388e+06
Finland	2045	Western Europe	SSP2	61835.4	5466088	1.78727	1.15274	4.11849e+06
Finland	2045	Western Europe	SSP3	57015.7	5414540	1.64797	1.09431	3.7633e+06
Finland	2045	Western Europe	SSP4	65049.7	5283398	1.88018	1.19153	4.18578e+06
Finland	2045	Western Europe	SSP5	68818.6	5709448	1.98911	1.23753	4.78595e+06
Finland	2050	Western Europe	SSP1	69007.3	5510260	1.99457	1.23965	4.63069e+06
Finland	2050	Western Europe	SSP2	65125	5472194	1.88235	1.19259	4.34118e+06
Finland	2050	Western Europe	SSP3	57518.6	5426403	1.6625	1.10041	3.80466e+06
Finland	2050	Western Europe	SSP4	68873.4	5223318	1.9907	1.2378	4.37986e+06
Finland	2050	Western Europe	SSP5	75752.6	5767927	2.18953	1.32157	5.31972e+06
Finland	2055	Western Europe	SSP1	73540.1	5503463	2.12558	1.29455	4.92713e+06
Finland	2055	Western Europe	SSP2	68793.1	5469405	1.98838	1.23702	4.58198e+06
Finland	2055	Western Europe	SSP3	58163.4	5435449	1.68114	1.10823	3.8535e+06
Finland	2055	Western Europe	SSP4	72648.3	5151159	2.09981	1.28347	4.55461e+06
Finland	2055	Western Europe	SSP5	83158.5	5814625	2.40359	1.41132	5.88465e+06
Finland	2060	Western Europe	SSP1	78354.8	5491714	2.26475	1.35287	5.23685e+06
Finland	2060	Western Europe	SSP2	72798.5	5468866	2.10415	1.28554	4.84687e+06
Finland	2060	Western Europe	SSP3	58806.2	5459663	1.69972	1.11604	3.91328e+06
Finland	2060	Western Europe	SSP4	76569.6	5073709	2.21315	1.3309	4.72682e+06
Finland	2060	Western Europe	SSP5	91324.4	5856605	2.63961	1.51027	6.50666e+06
Finland	2065	Western Europe	SSP1	83347.6	5482585	2.40906	1.41334	5.5597e+06
Finland	2065	Western Europe	SSP2	76998.5	5476536	2.22554	1.33643	5.13234e+06
Finland	2065	Western Europe	SSP3	59304	5507698	1.71411	1.12211	3.98114e+06
Finland	2065	Western Europe	SSP4	80562.1	4995803	2.32854	1.3792	4.89554e+06
Finland	2065	Western Europe	SSP5	100231	5896360	2.89705	1.61819	7.18718e+06
Finland	2070	Western Europe	SSP1	88143.5	5479914	2.54767	1.47143	5.87534e+06
Finland	2070	Western Europe	SSP2	81022.2	5492871	2.34184	1.38518	5.41545e+06
Finland	2070	Western Europe	SSP3	59385.4	5578697	1.71646	1.12315	4.03828e+06
Finland	2070	Western Europe	SSP4	84297.3	4917002	2.43651	1.42439	5.04048e+06
Finland	2070	Western Europe	SSP5	109457	5937354	3.16371	1.72999	7.9009e+06
Finland	2075	Western Europe	SSP1	92648.8	5476432	2.67789	1.52601	6.17047e+06
Finland	2075	Western Europe	SSP2	84814.8	5508155	2.45146	1.43113	5.68364e+06
Finland	2075	Western Europe	SSP3	59126.9	5663126	1.70899	1.12009	4.08205e+06
Finland	2075	Western Europe	SSP4	87699.2	4829080	2.53483	1.46553	5.14901e+06
Finland	2075	Western Europe	SSP5	118878	5972003	3.43602	1.84414	8.62872e+06
Finland	2080	Western Europe	SSP1	96950	5456420	2.80222	1.57809	6.43213e+06
Finland	2080	Western Europe	SSP2	88462.2	5513268	2.55689	1.47532	5.93253e+06
Finland	2080	Western Europe	SSP3	58685.5	5753724	1.69623	1.11481	4.11701e+06
Finland	2080	Western Europe	SSP4	90826.8	4725388	2.62523	1.50333	5.21708e+06
Finland	2080	Western Europe	SSP5	128586	5984450	3.71661	1.96175	9.35053e+06
Finland	2085	Western Europe	SSP1	101284	5385196	2.92748	1.63054	6.63058e+06
Finland	2085	Western Europe	SSP2	92085.3	5505796	2.66161	1.5192	6.1661e+06
Finland	2085	Western Europe	SSP3	58192.5	5848151	1.68198	1.10892	4.15009e+06
Finland	2085	Western Europe	SSP4	93779.5	4605358	2.71058	1.539	5.24884e+06
Finland	2085	Western Europe	SSP5	138882	5937902	4.01421	2.08643	1.00182e+07
Finland	2090	Western Europe	SSP1	105671	5270581	3.05428	1.68359	6.76906e+06
Finland	2090	Western Europe	SSP2	95723.3	5488167	2.76676	1.56326	6.38814e+06
Finland	2090	Western Europe	SSP3	57657.6	5950759	1.66652	1.10252	4.18484e+06
Finland	2090	Western Europe	SSP4	96616	4471019	2.79256	1.57325	5.24887e+06
Finland	2090	Western Europe	SSP5	149822	5838174	4.33041	2.21887	1.06231e+07
Finland	2095	Western Europe	SSP1	110029	5123092	3.18025	1.73626	6.84949e+06
Finland	2095	Western Europe	SSP2	99282.2	5467093	2.86962	1.60635	6.59921e+06
Finland	2095	Western Europe	SSP3	56987.3	6070532	1.64714	1.0945	4.22037e+06
Finland	2095	Western Europe	SSP4	99296.3	4327262	2.87003	1.6056	5.2201e+06
Finland	2095	Western Europe	SSP5	161324	5695482	4.66286	2.35809	1.11564e+07
Finland	2100	Western Europe	SSP1	114139	4960070	3.29904	1.78591	6.87782e+06
Finland	2100	Western Europe	SSP2	102586	5447237	2.96512	1.64636	6.79316e+06
Finland	2100	Western Europe	SSP3	56077.7	6210028	1.62085	1.08359	4.24962e+06
Finland	2100	Western Europe	SSP4	101708	4178127	2.93974	1.6347	5.16175e+06
Finland	2100	Western Europe	SSP5	173126	5525751	5.00399	2.50091	1.16131e+07
France	2003	Western Europe	Historical	40400	62256970	2.11994	0.68961	4.2933e+07
France	2004	Western Europe	Historical	41300	62716306	2.09461	0.66866	4.19359e+07
France	2005	Western Europe	Historical	41600	63188395	2.05151	0.69251	4.37586e+07
France	2008	Western Europe	Historical	42993.1	64379696	2.06117	0.8038	5.17484e+07
[truncated: 3,986 more rows]

## Sheet: 2|Fixed Effect & Plots
Countries	Estimated Fixed Effect		Digital Transformation Levels of Selected Countries
Argentina	0.359722
Armenia	0.370785
Australia	0.277757
Austria	0.096653
Azerbaijan	0.369872
Belarus	0.385084
Belgium	0.133125
Bosnia and Herzegovina	0.344599
Brazil	0.249234
Bulgaria	0.385264
Canada	0.240477
China	-0.752604
Colombia	0.419212
Costa Rica	0.35217
Croatia	0.324942
Cyprus	0.257244
Czech Republic	0.217861
Denmark	0.196232
Egypt	0.226812
Estonia	0.418175
Finland	0.19319
France	0.196699
Georgia	0.397809
Germany	0.093077
Greece	0.276149
Hungary	0.323434
Iceland	0.1397
India	-0.692839
Iran	0.218363
Ireland	0.025871
Israel	0.174278
Italy	0.16938
Japan	0.138072
Kazakhstan	0.367526
Latvia	0.361939
Lithuania	0.357357
Luxembourg	-0.494175
Macedonia	0.360013
Madagascar	0.227078
Malta	0.315795
Mexico	0.296224
Netherlands	0.202713
Norway	0.100782
Poland	0.333845
Portugal	0.289163
Romania	0.320419
Russia	0.214632
Singapore	-0.097617
Slovakia	0.315504
Slovenia	0.266503
South Africa	0.320114
South Korea, Rep.	0.313887
Spain	0.254225
Sweden	0.199731
Thailand	0.307837
Tunisia	0.324072
Turkiye	0.228055
Ukraine	0.365925
United Kingdom	0.275651
United States	-0.08811
Uzbekistan	0.359652
Vietnam	0.312093

## Sheet: 3|118 Countries
Country	Year	Scenario	GDP|PPP	Population	GDP per capita, PPP (2017)	R&D expenditure (% of GDP)	Predicted_Digi Transformation
Albania	2020	SSP1	38618600000	2872130	13446	0.385718	0.7399
Albania	2025	SSP1	48827100000	2792432	17485.5	0.501599	0.787328
Albania	2030	SSP1	58064500000	2714577	21389.9	0.613602	0.833169
Albania	2035	SSP1	68420200000	2615950	26155	0.750296	0.889113
Albania	2040	SSP1	79276100000	2505335	31642.9	0.907725	0.953545
Albania	2045	SSP1	89316600000	2390556	37362.3	1.07179	1.02069
Albania	2050	SSP1	97160900000	2274377	42719.8	1.22548	1.08359
Albania	2055	SSP1	103000000000	2157842	47852	1.37271	1.14383
Albania	2060	SSP1	108000000000	2041092	53047.1	1.52174	1.20482
Albania	2065	SSP1	113000000000	1933388	58470.9	1.67733	1.2685
Albania	2070	SSP1	118000000000	1835433	64151.6	1.84029	1.33521
Albania	2075	SSP1	122000000000	1746858	69647.9	1.99796	1.39976
Albania	2080	SSP1	125000000000	1664928	74940.2	2.14977	1.46191
Albania	2085	SSP1	127000000000	1585972	80116.2	2.29825	1.5227
Albania	2090	SSP1	129000000000	1507258	85341.7	2.44816	1.58408
Albania	2095	SSP1	129000000000	1428346	90651.7	2.60048	1.64644
Albania	2100	SSP1	130000000000	1351714	96038.1	2.755	1.70971
Albania	2020	SSP2	38618600000	2872130	13446	0.385718	0.7399
Albania	2025	SSP2	48827100000	2792892	17482.6	0.501516	0.787295
Albania	2030	SSP2	57907900000	2715290	21326.6	0.611786	0.832426
Albania	2035	SSP2	66504800000	2615463	25427.5	0.729428	0.880559
Albania	2040	SSP2	74317300000	2502981	29691.5	0.851747	0.930599
Albania	2045	SSP2	81192400000	2385457	34036.4	0.976387	0.981586
Albania	2050	SSP2	86926300000	2267882	38329.3	1.09953	1.03196
Albania	2055	SSP2	91855000000	2152949	42664.7	1.2239	1.08284
Albania	2060	SSP2	96359500000	2042264	47182.7	1.35351	1.13587
Albania	2065	SSP2	101000000000	1943096	51984.1	1.49124	1.19224
Albania	2070	SSP2	106000000000	1854005	57078.1	1.63737	1.25206
Albania	2075	SSP2	110000000000	1772339	62109.4	1.7817	1.31114
Albania	2080	SSP2	114000000000	1695654	67044.9	1.92329	1.36911
Albania	2085	SSP2	117000000000	1622656	71930.2	2.06343	1.42649
Albania	2090	SSP2	119000000000	1552862	76889	2.20568	1.48473
Albania	2095	SSP2	122000000000	1489053	81931.9	2.35034	1.54397
Albania	2100	SSP2	125000000000	1434299	87062.7	2.49753	1.60425
Albania	2020	SSP3	38618600000	2872130	13446	0.385718	0.7399
Albania	2025	SSP3	48827100000	2849514	17135.2	0.491551	0.783257
Albania	2030	SSP3	57760400000	2831406	20399.9	0.585202	0.821626
Albania	2035	SSP3	64812800000	2789956	23230.8	0.66641	0.854876
Albania	2040	SSP3	69769900000	2732699	25531.5	0.73241	0.881879
Albania	2045	SSP3	73011400000	2664913	27397.3	0.785933	0.903759
Albania	2050	SSP3	75285000000	2596018	29000.2	0.831915	0.922548
Albania	2055	SSP3	77099400000	2531191	30459.7	0.873784	0.939655
Albania	2060	SSP3	78697500000	2471883	31837.1	0.913295	0.955799
Albania	2065	SSP3	80400000000	2419182	33234.4	0.953379	0.972185
Albania	2070	SSP3	82185200000	2370721	34666.8	0.994469	0.988985
Albania	2075	SSP3	83571700000	2325201	35941.7	1.03104	1.00394
Albania	2080	SSP3	84511800000	2282782	37021.4	1.06202	1.0166
Albania	2085	SSP3	85128000000	2245529	37910	1.08751	1.02701
Albania	2090	SSP3	85715600000	2216828	38665.9	1.10919	1.03588
Albania	2095	SSP3	86506100000	2199655	39327.1	1.12816	1.04364
Albania	2100	SSP3	87661200000	2194968	39937.3	1.14566	1.05081
Albania	2020	SSP4	38618600000	2872130	13446	0.385718	0.7399
Albania	2025	SSP4	48827100000	2785785	17527.2	0.502795	0.787813
Albania	2030	SSP4	57965300000	2696919	21493.2	0.616564	0.834369
Albania	2035	SSP4	67119700000	2582879	25986.4	0.745459	0.887103
Albania	2040	SSP4	75716800000	2453504	30860.7	0.885286	0.944304
Albania	2045	SSP4	83176600000	2319536	35859.2	1.02867	1.00296
Albania	2050	SSP4	88833500000	2185187	40652.6	1.16618	1.05921
Albania	2055	SSP4	93052800000	2053134	45322.3	1.30014	1.114
Albania	2060	SSP4	96411200000	1925585	50068.5	1.43629	1.1697
Albania	2065	SSP4	99572700000	1810411	55000.1	1.57776	1.22759
Albania	2070	SSP4	103000000000	1705860	60138.6	1.72517	1.28792
Albania	2075	SSP4	105000000000	1608743	65111.7	1.86783	1.34631
Albania	2080	SSP4	106000000000	1516231	69918.1	2.00571	1.40274
Albania	2085	SSP4	106000000000	1426841	74625	2.14073	1.45801
Albania	2090	SSP4	106000000000	1339936	79374.7	2.27698	1.51378
Albania	2095	SSP4	106000000000	1258191	84160.5	2.41427	1.56998
Albania	2100	SSP4	105000000000	1184249	88988.9	2.55278	1.62669
Albania	2020	SSP5	38618600000	2872130	13446	0.385718	0.7399
Albania	2025	SSP5	48827100000	2688335	18162.6	0.521021	0.795203
Albania	2030	SSP5	58298200000	2515243	23178	0.664895	0.854027
Albania	2035	SSP5	70797700000	2335426	30314.7	0.869623	0.937787
Albania	2040	SSP5	84678900000	2159772	39207.3	1.12472	1.0422
Albania	2045	SSP5	96655700000	1994995	48449.1	1.38984	1.15072
Albania	2050	SSP5	105000000000	1841891	56866	1.63129	1.24955
Albania	2055	SSP5	111000000000	1699885	65014.4	1.86504	1.34524
Albania	2060	SSP5	115000000000	1568348	73563.4	2.11028	1.44564
Albania	2065	SSP5	121000000000	1456291	82797.3	2.37517	1.55412
Albania	2070	SSP5	126000000000	1361289	92723.9	2.65993	1.67075
Albania	2075	SSP5	132000000000	1280431	102716	2.94657	1.78817
Albania	2080	SSP5	137000000000	1209481	112870	3.23785	1.90749
Albania	2085	SSP5	141000000000	1144383	123402	3.53997	2.03126
Albania	2090	SSP5	146000000000	1082490	134589	3.86088	2.16274
Albania	2095	SSP5	150000000000	1023112	146529	4.20342	2.30308
Albania	2100	SSP5	154000000000	967321	159222	4.56753	2.45227
Algeria	2020	SSP1	464000000000	43090992	10761.5	0.308709	0.5173
Algeria	2025	SSP1	543000000000	46489671	11686.2	0.335237	0.530992
Algeria	2030	SSP1	596000000000	49185489	12115.1	0.347541	0.538272
Algeria	2035	SSP1	671000000000	51363636	13060.5	0.374659	0.551193
Algeria	2040	SSP1	765000000000	53239932	14376.7	0.412416	0.568225
Algeria	2045	SSP1	893000000000	54998863	16245.8	0.466034	0.59166
Algeria	2050	SSP1	1050000000000	56524866	18609.5	0.533842	0.620717
Algeria	2055	SSP1	1240000000000	57566367	21567.5	0.618695	0.656359
Algeria	2060	SSP1	1470000000000	58053923	25286.3	0.725377	0.700488
Algeria	2065	SSP1	1730000000000	58052425	29839.6	0.855994	0.754021
Algeria	2070	SSP1	2020000000000	57704320	35037.1	1.00509	0.814841
Algeria	2075	SSP1	2330000000000	57133663	40829.3	1.17125	0.88247
Algeria	2080	SSP1	2660000000000	56412468	47209.6	1.35428	0.956887
Algeria	2085	SSP1	3020000000000	55567666	54265	1.55667	1.03914
Algeria	2090	SSP1	3390000000000	54615303	62132.4	1.78236	1.13085
Algeria	2095	SSP1	3800000000000	53577029	70891.9	2.03364	1.23298
Algeria	2100	SSP1	4220000000000	52441982	80529.8	2.31012	1.34535
Algeria	2020	SSP2	464000000000	43090992	10761.5	0.308709	0.5173
Algeria	2025	SSP2	543000000000	46733634	11625.2	0.333487	0.530477
Algeria	2030	SSP2	596000000000	49867679	11956.8	0.343	0.536976
Algeria	2035	SSP2	667000000000	52621892	12668.7	0.363422	0.547631
Algeria	2040	SSP2	743000000000	55228058	13449	0.385806	0.558967
Algeria	2045	SSP2	835000000000	57747062	14453.6	0.414624	0.572868
Algeria	2050	SSP2	950000000000	60088849	15806.3	0.453427	0.590715
Algeria	2055	SSP2	1090000000000	61957573	17639	0.506002	0.613813
Algeria	2060	SSP2	1270000000000	63274284	20043.1	0.574966	0.643171
Algeria	2065	SSP2	1480000000000	64075200	23072.6	0.661872	0.679455
Algeria	2070	SSP2	1720000000000	64568813	26580.5	0.762502	0.721108
Algeria	2075	SSP2	1980000000000	64933188	30535.4	0.875954	0.76791
Algeria	2080	SSP2	2280000000000	65246545	34942.4	1.00238	0.819985
Algeria	2085	SSP2	2610000000000	65495387	39908.9	1.14485	0.878585
Algeria	2090	SSP2	2990000000000	65605348	45595.8	1.30799	0.945539
Algeria	2095	SSP2	3420000000000	65532883	52113.5	1.49496	1.02211
Algeria	2100	SSP2	3880000000000	65216845	59493.7	1.70667	1.10862
Algeria	2020	SSP3	464000000000	43090992	10761.5	0.308709	0.5173
Algeria	2025	SSP3	543000000000	46978044	11564.7	0.331752	0.529969
Algeria	2030	SSP3	598000000000	50536053	11823.5	0.339175	0.535963
Algeria	2035	SSP3	664000000000	53891243	12313.5	0.353232	0.544508
Algeria	2040	SSP3	714000000000	57316283	12458	0.357378	0.549048
Algeria	2045	SSP3	754000000000	60756011	12402.9	0.355797	0.551254
Algeria	2050	SSP3	795000000000	64155012	12385.8	0.355307	0.553873
Algeria	2055	SSP3	842000000000	67186646	12531.9	0.359496	0.558104
Algeria	2060	SSP3	895000000000	69788942	12820.2	0.367766	0.563653
Algeria	2065	SSP3	951000000000	71957790	13220.5	0.379251	0.570159
Algeria	2070	SSP3	1010000000000	73990332	13593.8	0.389959	0.576234
Algeria	2075	SSP3	1060000000000	76132135	13907.1	0.398947	0.581695
Algeria	2080	SSP3	1110000000000	78451873	14161.8	0.406253	0.586614
Algeria	2085	SSP3	1170000000000	80862189	14412.2	0.413435	0.591557
Algeria	2090	SSP3	1220000000000	83183358	14711.5	0.422021	0.597001
Algeria	2095	SSP3	1290000000000	85287631	15069.8	0.432301	0.60296
Algeria	2100	SSP3	1350000000000	87158700	15460.9	0.443519	0.60911
Algeria	2020	SSP4	464000000000	43090992	10761.5	0.308709	0.5173
Algeria	2025	SSP4	543000000000	46947918	11572.1	0.331965	0.530031
Algeria	2030	SSP4	598000000000	50480342	11841.2	0.339684	0.536125
Algeria	2035	SSP4	669000000000	53802030	12427.1	0.356489	0.545769
Algeria	2040	SSP4	732000000000	57168135	12801.7	0.367238	0.552966
Algeria	2045	SSP4	794000000000	60505778	13121.9	0.37642	0.559499
Algeria	2050	SSP4	868000000000	63776026	13609.3	0.390404	0.567943
Algeria	2055	SSP4	960000000000	66659834	14400.1	0.41309	0.579633
Algeria	2060	SSP4	1070000000000	69097515	15497.8	0.444578	0.594561
Algeria	2065	SSP4	1200000000000	71092858	16907	0.485004	0.612786
Algeria	2070	SSP4	1350000000000	72930514	18486.4	0.53031	0.632879
Algeria	2075	SSP4	1510000000000	74846225	20203.8	0.579578	0.654661
Algeria	2080	SSP4	1700000000000	76909134	22063.7	0.632931	0.67824
Algeria	2085	SSP4	1910000000000	79039653	24153.1	0.692868	0.704573
Algeria	2090	SSP4	2160000000000	81066662	26583.7	0.762593	0.734832
Algeria	2095	SSP4	2440000000000	82864680	29417.2	0.843878	0.769639
Algeria	2100	SSP4	2760000000000	84411205	32654	0.936729	0.808977
Algeria	2020	SSP5	464000000000	43090992	10761.5	0.308709	0.5173
Algeria	2025	SSP5	543000000000	46404609	11707.6	0.335851	0.531173
Algeria	2030	SSP5	596000000000	48993266	12168.5	0.349073	0.53874
Algeria	2035	SSP5	682000000000	51047961	13363.6	0.383354	0.554495
Algeria	2040	SSP5	813000000000	52788597	15393.5	0.441586	0.579806
Algeria	2045	SSP5	1000000000000	54400587	18394.8	0.527684	0.616431
Algeria	2050	SSP5	1230000000000	55771666	22097.8	0.633909	0.661105
Algeria	2055	SSP5	1510000000000	56656704	26679.5	0.765341	0.715708
Algeria	2060	SSP5	1850000000000	56990991	32473.7	0.931559	0.784111
Algeria	2065	SSP5	2260000000000	56855450	39708.4	1.1391	0.86906
Algeria	2070	SSP5	2720000000000	56392233	48252.7	1.3842	0.969135
Algeria	2075	SSP5	3240000000000	55724300	58139.1	1.66781	1.08482
Algeria	2080	SSP5	3810000000000	54923753	69458.5	1.99252	1.21724
Algeria	2085	SSP5	4450000000000	54018961	82451.8	2.36526	1.36926
Algeria	2090	SSP5	5170000000000	53027650	97465.4	2.79594	1.54496
Algeria	2095	SSP5	5970000000000	51971749	114794	3.29304	1.74782
Algeria	2100	SSP5	6840000000000	50840300	134601	3.86124	1.97976
Angola	2020	SSP1	201000000000	32899002	6121.61	0.175608	0.3847
Angola	2025	SSP1	227000000000	37901990	5990.11	0.171835	0.387304
Angola	2030	SSP1	273000000000	42685853	6386.85	0.183216	0.395937
Angola	2035	SSP1	335000000000	47354971	7081.16	0.203134	0.407974
Angola	2040	SSP1	418000000000	51825379	8064.14	0.231332	0.42324
Angola	2045	SSP1	532000000000	56146416	9481.66	0.271996	0.443491
Angola	2050	SSP1	682000000000	60172180	11329.7	0.32501	0.468559
Angola	2055	SSP1	870000000000	63756125	13637.9	0.391224	0.49867
Angola	2060	SSP1	1100000000000	66860270	16480.6	0.472772	0.534669
Angola	2065	SSP1	1380000000000	69467627	19909.6	0.571136	0.577147
Angola	2070	SSP1	1710000000000	71530500	23942.4	0.686824	0.626274
Angola	2075	SSP1	2090000000000	73055205	28614.1	0.82084	0.682466
Angola	2080	SSP1	2510000000000	73977367	33950.7	0.973926	0.745975
Angola	2085	SSP1	2970000000000	74261338	40014.8	1.14788	0.817509
Angola	2090	SSP1	3470000000000	73877573	46922.6	1.34605	0.898409
Angola	2095	SSP1	3990000000000	72948308	54685.3	1.56873	0.988907
Angola	2100	SSP1	4530000000000	71521112	63333.3	1.81681	1.0894
Angola	2020	SSP2	201000000000	32899002	6121.61	0.175608	0.3847
Angola	2025	SSP2	227000000000	38359026	5918.74	0.169788	0.386844
Angola	2030	SSP2	273000000000	44109039	6181.09	0.177314	0.394699
Angola	2035	SSP2	333000000000	50164672	6642.2	0.190542	0.405144
Angola	2040	SSP2	409000000000	56447914	7251.76	0.208028	0.417523
Angola	2045	SSP2	510000000000	62758740	8118.42	0.232889	0.432948
Angola	2050	SSP2	640000000000	68996304	9278.71	0.266174	0.451765
Angola	2055	SSP2	807000000000	75030294	10761.2	0.308701	0.4742
Angola	2060	SSP2	1020000000000	80844842	12575.6	0.360749	0.500356
Angola	2065	SSP2	1270000000000	86254989	14760.9	0.423439	0.530538
Angola	2070	SSP2	1580000000000	91113125	17332.4	0.497207	0.564803
Angola	2075	SSP2	1940000000000	95404473	20322.8	0.582992	0.603522
Angola	2080	SSP2	2350000000000	98970686	23769.5	0.681863	0.647004
Angola	2085	SSP2	2820000000000	101727378	27726.6	0.795379	0.695816
Angola	2090	SSP2	3340000000000	103619312	32275.8	0.925882	0.750873
Angola	2095	SSP2	3920000000000	104908786	37377.2	1.07222	0.811922
Angola	2100	SSP2	4550000000000	105655693	43031	1.23441	0.879016
Angola	2020	SSP3	201000000000	32899002	6121.61	0.175608	0.3847
Angola	2025	SSP3	227000000000	38565873	5886.99	0.168877	0.386643
Angola	2030	SSP3	273000000000	44885468	6076.15	0.174304	0.394109
Angola	2035	SSP3	331000000000	51989305	6371.21	0.182768	0.403471
Angola	2040	SSP3	395000000000	59889265	6590.2	0.18905	0.4126
Angola	2045	SSP3	468000000000	68136806	6862.05	0.196848	0.422638
Angola	2050	SSP3	554000000000	76687704	7230.34	0.207413	0.434062
Angola	2055	SSP3	658000000000	85462482	7694.59	0.220731	0.446799
Angola	2060	SSP3	775000000000	94524928	8197.59	0.235161	0.460231
Angola	2065	SSP3	905000000000	103504192	8741.9	0.250775	0.47408
Angola	2070	SSP3	1040000000000	112124099	9312	0.267129	0.487934
Angola	2075	SSP3	1190000000000	120338849	9900.54	0.284012	0.501668
Angola	2080	SSP3	1340000000000	127819376	10506.5	0.301394	0.514998
Angola	2085	SSP3	1500000000000	134393663	11128.6	0.31924	0.527766
Angola	2090	SSP3	1650000000000	140021179	11765.1	0.337501	0.539919
Angola	2095	SSP3	1790000000000	145130825	12362.1	0.354625	0.551176
Angola	2100	SSP3	1930000000000	149754481	12904.1	0.370173	0.561384
Angola	2020	SSP4	201000000000	32899002	6121.61	0.175608	0.3847
Angola	2025	SSP4	227000000000	38680464	5869.55	0.168377	0.386533
Angola	2030	SSP4	273000000000	45189086	6039.93	0.173265	0.393935
Angola	2035	SSP4	334000000000	52540528	6357	0.18236	0.403762
Angola	2040	SSP4	404000000000	60728495	6656.32	0.190947	0.414073
Angola	2045	SSP4	490000000000	69282483	7075.63	0.202975	0.426099
Angola	2050	SSP4	599000000000	78158025	7669.19	0.220003	0.440441
Angola	2055	SSP4	738000000000	87277791	8450.25	0.242408	0.45719
Angola	2060	SSP4	906000000000	96709517	9373.13	0.268883	0.475865
Angola	2065	SSP4	1110000000000	106054276	10459.3	0.30004	0.496387
Angola	2070	SSP4	1350000000000	115015697	11711.5	0.335963	0.518545
Angola	2075	SSP4	1620000000000	123542621	13142.2	0.377004	0.542439
Angola	2080	SSP4	1940000000000	131290447	14772.1	0.423761	0.56803
Angola	2085	SSP4	2300000000000	138083913	16623.4	0.476869	0.595433
Angola	2090	SSP4	2690000000000	143894719	18718.2	0.53696	0.624882
Angola	2095	SSP4	3130000000000	149155509	20993.2	0.602222	0.655994
Angola	2100	SSP4	3610000000000	153895858	23433.6	0.672228	0.688619
Angola	2020	SSP5	201000000000	32899002	6121.61	0.175608	0.3847
Angola	2025	SSP5	227000000000	38054939	5966.03	0.171145	0.387148
Angola	2030	SSP5	273000000000	43007291	6345.99	0.182045	0.395724
Angola	2035	SSP5	341000000000	47851459	7130.71	0.204555	0.408969
Angola	2040	SSP5	443000000000	52495824	8445.11	0.242261	0.428275
Angola	2045	SSP5	595000000000	56987219	10444	0.299602	0.455503
Angola	2050	SSP5	800000000000	61177742	13069.2	0.374911	0.489845
Angola	2055	SSP5	1060000000000	64918607	16400.1	0.470461	0.532111
Angola	2060	SSP5	1400000000000	68169892	20602.1	0.591002	0.584212
Angola	2065	SSP5	1830000000000	70896140	25825.1	0.740833	0.647883
Angola	2070	SSP5	2350000000000	73047460	32182.5	0.923204	0.724415
Angola	2075	SSP5	2970000000000	74629826	39818.8	1.14226	0.81551
Angola	2080	SSP5	3690000000000	75579179	48876.4	1.4021	0.922792
Angola	2085	SSP5	4520000000000	75861193	59565.2	1.70872	1.0487
Angola	2090	SSP5	5450000000000	75448023	72199.6	2.07116	1.1969
Angola	2095	SSP5	6480000000000	74466340	86960.9	2.49461	1.36964
Angola	2100	SSP5	7590000000000	72966906	104076	2.98558	1.56963
Antigua and Barbuda	2020	SSP1	1740940000	92375	18846.4	0.540639	0.6055
Antigua and Barbuda	2025	SSP1	2333000000	95305	24479.3	0.702226	0.67173
Antigua and Barbuda	2030	SSP1	2692470000	97642	27574.9	0.791029	0.708129
Antigua and Barbuda	2035	SSP1	3137370000	99427	31554.5	0.905189	0.75492
Antigua and Barbuda	2040	SSP1	3668570000	100578	36474.9	1.04634	0.812772
Antigua and Barbuda	2045	SSP1	4288720000	101203	42377.4	1.21566	0.88217
Antigua and Barbuda	2050	SSP1	4950470000	101325	48857.3	1.40155	0.958358
Antigua and Barbuda	2055	SSP1	5646450000	100918	55950.9	1.60504	1.04176
Antigua and Barbuda	2060	SSP1	6390950000	100082	63857.1	1.83184	1.13472
Antigua and Barbuda	2065	SSP1	7186720000	98771	72761.4	2.08727	1.23941
Antigua and Barbuda	2070	SSP1	7992840000	97061	82348.6	2.3623	1.35213
Antigua and Barbuda	2075	SSP1	8794790000	94981	92595.3	2.65624	1.4726
Antigua and Barbuda	2080	SSP1	9565610000	92464	103452	2.96769	1.60025
Antigua and Barbuda	2085	SSP1	10291900000	89503	114989	3.29865	1.73589
Antigua and Barbuda	2090	SSP1	10960800000	86107	127293	3.65159	1.88054
Antigua and Barbuda	2095	SSP1	11558700000	82328	140398	4.02754	2.03463
Antigua and Barbuda	2100	SSP1	12069400000	78225	154291	4.42607	2.19796
Antigua and Barbuda	2020	SSP2	1740940000	92375	18846.4	0.540639	0.6055
Antigua and Barbuda	2025	SSP2	2333000000	95452	24441.6	0.701145	0.671287
Antigua and Barbuda	2030	SSP2	2690260000	98113	27420	0.786585	0.706308
Antigua and Barbuda	2035	SSP2	3093970000	100311	30843.8	0.884801	0.746564
Antigua and Barbuda	2040	SSP2	3520880000	101984	34523.8	0.990369	0.789834
Antigua and Barbuda	2045	SSP2	3986450000	103085	38671.5	1.10935	0.8386
Antigua and Barbuda	2050	SSP2	4497440000	103738	43353.8	1.24367	0.893653
Antigua and Barbuda	2055	SSP2	5063300000	104009	48681.4	1.3965	0.956291
Antigua and Barbuda	2060	SSP2	5697130000	104057	54750.1	1.57059	1.02764
Antigua and Barbuda	2065	SSP2	6404280000	103792	61703	1.77005	1.10939
Antigua and Barbuda	2070	SSP2	7157540000	103223	69340.6	1.98914	1.19919
Antigua and Barbuda	2075	SSP2	7951630000	102349	77691.3	2.22869	1.29737
Antigua and Barbuda	2080	SSP2	8772490000	101110	86761.8	2.4889	1.40402
Antigua and Barbuda	2085	SSP2	9613610000	99476	96642.5	2.77234	1.52019
Antigua and Barbuda	2090	SSP2	10468800000	97458	107419	3.08147	1.64688
Antigua and Barbuda	2095	SSP2	11328300000	95124	119090	3.41627	1.7841
Antigua and Barbuda	2100	SSP2	12178000000	92468	131700	3.778	1.93236
Antigua and Barbuda	2020	SSP3	1740940000	92375	18846.4	0.540639	0.6055
Antigua and Barbuda	2025	SSP3	2333000000	95092	24534.1	0.703799	0.672375
Antigua and Barbuda	2030	SSP3	2686280000	97417	27575.1	0.791033	0.70813
Antigua and Barbuda	2035	SSP3	3023690000	99332	30440.2	0.873225	0.741819
Antigua and Barbuda	2040	SSP3	3290600000	100694	32679.2	0.937453	0.768144
Antigua and Barbuda	2045	SSP3	3497120000	101367	34499.6	0.989674	0.789548
Antigua and Barbuda	2050	SSP3	3679160000	101547	36231.1	1.03934	0.809906
Antigua and Barbuda	2055	SSP3	3856340000	101450	38012.2	1.09044	0.830847
Antigua and Barbuda	2060	SSP3	4035820000	101357	39817.9	1.14224	0.852077
Antigua and Barbuda	2065	SSP3	4223260000	101214	41726	1.19698	0.874512
Antigua and Barbuda	2070	SSP3	4406220000	101010	43621.6	1.25135	0.896799
Antigua and Barbuda	2075	SSP3	4589810000	100739	45561.4	1.307	0.919606
Antigua and Barbuda	2080	SSP3	4773210000	100360	47560.9	1.36436	0.943114
Antigua and Barbuda	2085	SSP3	4959910000	99908	49644.8	1.42414	0.967615
Antigua and Barbuda	2090	SSP3	5153130000	99465	51808.5	1.48621	0.993054
Antigua and Barbuda	2095	SSP3	5352870000	99011	54063.4	1.55089	1.01957
Antigua and Barbuda	2100	SSP3	5558830000	98546	56408.5	1.61816	1.04714
Antigua and Barbuda	2020	SSP4	1740940000	92375	18846.4	0.540639	0.6055
Antigua and Barbuda	2025	SSP4	2333000000	95627	24396.9	0.699862	0.670761
Antigua and Barbuda	2030	SSP4	2691890000	98599	27301.4	0.783182	0.704913
Antigua and Barbuda	2035	SSP4	3129670000	101249	30910.6	0.886719	0.747351
Antigua and Barbuda	2040	SSP4	3656310000	103504	35325.3	1.01336	0.799258
Antigua and Barbuda	2045	SSP4	4281740000	105167	40713.7	1.16794	0.862613
Antigua and Barbuda	2050	SSP4	4971420000	106418	46716	1.34012	0.933185
Antigua and Barbuda	2055	SSP4	5730470000	107448	53332.5	1.52992	1.01098
Antigua and Barbuda	2060	SSP4	6572780000	108520	60567.5	1.73747	1.09604
Antigua and Barbuda	2065	SSP4	7507260000	109445	68593.9	1.96772	1.19042
Antigua and Barbuda	2070	SSP4	8512290000	110219	77230.7	2.21548	1.29196
Antigua and Barbuda	2075	SSP4	9592390000	110790	86581.7	2.48373	1.40191
Antigua and Barbuda	2080	SSP4	10741300000	111100	96681.4	2.77345	1.52065
Antigua and Barbuda	2085	SSP4	11959700000	111162	107588	3.08633	1.64889
Antigua and Barbuda	2090	SSP4	13250200000	110998	119373	3.42441	1.78745
Antigua and Barbuda	2095	SSP4	14606200000	110581	132086	3.78909	1.93692
Antigua and Barbuda	2100	SSP4	16020600000	109909	145762	4.18142	2.09772
Antigua and Barbuda	2020	SSP5	1740940000	92375	18846.4	0.540639	0.6055
Antigua and Barbuda	2025	SSP5	2333000000	96349	24214.1	0.694617	0.668613
Antigua and Barbuda	2030	SSP5	2696400000	99791	27020.5	0.775124	0.701612
Antigua and Barbuda	2035	SSP5	3219320000	102751	31331.3	0.898786	0.752298
Antigua and Barbuda	2040	SSP5	3953820000	105138	37606	1.07879	0.826074
Antigua and Barbuda	2045	SSP5	4888250000	107059	45659.4	1.30981	0.920763
Antigua and Barbuda	2050	SSP5	5929770000	108514	54645.2	1.56758	1.02641
Antigua and Barbuda	2055	SSP5	7085170000	109431	64745.5	1.85733	1.14517
Antigua and Barbuda	2060	SSP5	8395550000	109880	76406.5	2.19184	1.28227
Antigua and Barbuda	2065	SSP5	9877690000	109703	90040.3	2.58294	1.44257
Antigua and Barbuda	2070	SSP5	11489900000	108977	105434	3.02454	1.62356
Antigua and Barbuda	2075	SSP5	13218900000	107735	122698	3.51979	1.82654
Antigua and Barbuda	2080	SSP5	15032700000	105912	141936	4.07164	2.05272
Antigua and Barbuda	2085	SSP5	16911200000	103493	163404	4.6875	2.30513
Antigua and Barbuda	2090	SSP5	18831000000	100485	187401	5.37589	2.58727
Antigua and Barbuda	2095	SSP5	20759100000	96922	214184	6.14418	2.90216
Antigua and Barbuda	2100	SSP5	22648700000	92815	244020	7.00008	3.25296
Bahamas	2020	SSP1	10622000000	405769	26177.5	0.75094	0.7017
Bahamas	2025	SSP1	15338700000	414814	36977.3	1.06075	0.828686
Bahamas	2030	SSP1	16617400000	423220	39264.2	1.12635	0.855581
Bahamas	2035	SSP1	18164700000	429783	42264.8	1.21243	0.890866
Bahamas	2040	SSP1	19896700000	433802	45865.9	1.31573	0.933208
Bahamas	2045	SSP1	21783100000	435946	49967.4	1.43339	0.981433
Bahamas	2050	SSP1	23674300000	436052	54292.4	1.55746	1.03228
Bahamas	2055	SSP1	25540500000	434101	58835.4	1.68778	1.0857
Bahamas	2060	SSP1	27415500000	430213	63725.4	1.82806	1.14319
Bahamas	2065	SSP1	29287300000	424611	68974.4	1.97864	1.2049
Bahamas	2070	SSP1	31139000000	417678	74552.6	2.13866	1.27048
Bahamas	2075	SSP1	32932900000	409579	80406.7	2.30659	1.3393
Bahamas	2080	SSP1	34644400000	400252	86556.5	2.483	1.4116
Bahamas	2085	SSP1	36241200000	389581	93026.1	2.6686	1.48765
Bahamas	2090	SSP1	37655600000	377369	99784.6	2.86247	1.56711
Bahamas	2095	SSP1	38843400000	363442	106876	3.06592	1.65048
Bahamas	2100	SSP1	39759300000	347822	114309	3.27914	1.73785
Bahamas	2020	SSP2	10622000000	405769	26177.5	0.75094	0.7017
Bahamas	2025	SSP2	15338700000	415478	36918.2	1.05906	0.827991
Bahamas	2030	SSP2	16604300000	425289	39042.4	1.11999	0.852975
Bahamas	2035	SSP2	17964800000	433852	41407.7	1.18784	0.880791
Bahamas	2040	SSP2	19311400000	440395	43850.2	1.25791	0.909514
Bahamas	2045	SSP2	20711500000	444828	46560.7	1.33566	0.941386
Bahamas	2050	SSP2	22206900000	447237	49653.5	1.42439	0.977752
Bahamas	2055	SSP2	23800500000	447861	53142.6	1.52448	1.01878
Bahamas	2060	SSP2	25499100000	447176	57022.5	1.63578	1.06439
Bahamas	2065	SSP2	27294200000	445261	61299.3	1.75847	1.11467
Bahamas	2070	SSP2	29170100000	442368	65940.8	1.89161	1.16924
Bahamas	2075	SSP2	31101000000	438443	70935.1	2.03488	1.22796
Bahamas	2080	SSP2	33066800000	433284	76316.7	2.18926	1.29123
Bahamas	2085	SSP2	35053200000	426799	82130.5	2.35604	1.35958
Bahamas	2090	SSP2	37027300000	419049	88360.3	2.53475	1.43282
Bahamas	2095	SSP2	38986300000	410300	95019	2.72577	1.5111
Bahamas	2100	SSP2	40937200000	400918	102109	2.92914	1.59445
Bahamas	2020	SSP3	10622000000	405769	26177.5	0.75094	0.7017
Bahamas	2025	SSP3	15338700000	414883	36971.1	1.06057	0.828613
Bahamas	2030	SSP3	16584800000	424668	39053.6	1.12031	0.853105
Bahamas	2035	SSP3	17655400000	433655	40713	1.16791	0.872624
Bahamas	2040	SSP3	18397100000	440876	41728.5	1.19705	0.884569
Bahamas	2045	SSP3	18922600000	445556	42469.6	1.21831	0.893287
Bahamas	2050	SSP3	19382300000	448122	43252.3	1.24076	0.902491
Bahamas	2055	SSP3	19812500000	449188	44107.4	1.26529	0.912545
Bahamas	2060	SSP3	20205400000	449525	44948.3	1.28941	0.922433
Bahamas	2065	SSP3	20572300000	449513	45765.8	1.31286	0.932044
Bahamas	2070	SSP3	20921300000	449520	46541.4	1.33511	0.941164
Bahamas	2075	SSP3	21254300000	449450	47289.6	1.35657	0.94996
Bahamas	2080	SSP3	21573900000	449069	48041.4	1.37814	0.958799
Bahamas	2085	SSP3	21890500000	448349	48824.7	1.40061	0.968008
Bahamas	2090	SSP3	22206200000	447595	49612.3	1.4232	0.977267
Bahamas	2095	SSP3	22539000000	447254	50394.2	1.44563	0.98646
Bahamas	2100	SSP3	22904300000	447689	51161.2	1.46764	0.995479
Bahamas	2020	SSP4	10622000000	405769	26177.5	0.75094	0.7017
Bahamas	2025	SSP4	15338700000	416369	36839.2	1.05679	0.827063
Bahamas	2030	SSP4	16613900000	428040	38813.9	1.11344	0.85029
Bahamas	2035	SSP4	18122300000	439154	41266.4	1.18379	0.879134
Bahamas	2040	SSP4	19841500000	448615	44228.3	1.26876	0.913967
Bahamas	2045	SSP4	21782900000	455522	47819.6	1.37178	0.956197
Bahamas	2050	SSP4	23845100000	460462	51785.2	1.48554	1.00283
Bahamas	2055	SSP4	26025100000	464052	56082.3	1.60881	1.05335
Bahamas	2060	SSP4	28325900000	467007	60654.1	1.73996	1.10711
Bahamas	2065	SSP4	30764800000	469310	65553.3	1.8805	1.16471
Bahamas	2070	SSP4	33356200000	471290	70776.4	2.03033	1.22612
Bahamas	2075	SSP4	36103000000	472816	76357.4	2.19043	1.29174
Bahamas	2080	SSP4	39005300000	473628	82354.3	2.36246	1.36225
Bahamas	2085	SSP4	42078200000	473692	88830.3	2.54823	1.43839
Bahamas	2090	SSP4	45327200000	473282	95772.1	2.74737	1.52001
Bahamas	2095	SSP4	48787300000	472808	103186	2.96006	1.60718
Bahamas	2100	SSP4	52495100000	472610	111075	3.18635	1.69993
Bahamas	2020	SSP5	10622000000	405769	26177.5	0.75094	0.7017
Bahamas	2025	SSP5	15338700000	417455	36743.4	1.05404	0.825937
Bahamas	2030	SSP5	16637900000	428837	38797.7	1.11297	0.850101
Bahamas	2035	SSP5	18543400000	438629	42275.8	1.21275	0.891002
Bahamas	2040	SSP5	21118700000	446112	47339.5	1.358	0.950544
Bahamas	2045	SSP5	24199200000	451962	53542.6	1.53595	1.02348
Bahamas	2050	SSP5	27434300000	455993	60163.9	1.72589	1.10133
Bahamas	2055	SSP5	30837200000	458133	67310.6	1.93091	1.18536
Bahamas	2060	SSP5	34507500000	458401	75278	2.15946	1.27904
Bahamas	2065	SSP5	38449100000	456563	84214.2	2.41581	1.3841
Bahamas	2070	SSP5	42654600000	452985	94163.4	2.70122	1.50108
Bahamas	2075	SSP5	47080900000	447812	105135	3.01597	1.63008
Bahamas	2080	SSP5	51693200000	440991	117221	3.36265	1.77216
Bahamas	2085	SSP5	56438600000	432341	130542	3.74479	1.92878
Bahamas	2090	SSP5	61207200000	421673	145153	4.16394	2.10056
Bahamas	2095	SSP5	65898800000	408788	161205	4.62442	2.28928
Bahamas	2100	SSP5	70391700000	393614	178834	5.13014	2.49654
Bahrain	2020	SSP1	70909900000	1494035	47462	1.36152	0.8213
Bahrain	2025	SSP1	83789100000	1619651	51732.8	1.48403	0.871618
Bahrain	2030	SSP1	96164800000	1731858	55527	1.59288	0.91632
Bahrain	2035	SSP1	110000000000	1833156	59984.5	1.72075	0.968814
Bahrain	2040	SSP1	123000000000	1926117	63996.1	1.83583	1.01606
Bahrain	2045	SSP1	136000000000	2012017	67830.9	1.94583	1.06122
Bahrain	2050	SSP1	149000000000	2087571	71528.1	2.05189	1.10475
Bahrain	2055	SSP1	163000000000	2147612	75676.6	2.1709	1.15357
Bahrain	2060	SSP1	176000000000	2189711	80512.5	2.30962	1.21046
Bahrain	2065	SSP1	190000000000	2207114	86148.7	2.47131	1.27675
Bahrain	2070	SSP1	202000000000	2200073	91760.6	2.63229	1.34272
Bahrain	2075	SSP1	212000000000	2169342	97514.8	2.79736	1.41035
Bahrain	2080	SSP1	219000000000	2115932	103477	2.96839	1.48041
Bahrain	2085	SSP1	224000000000	2043851	109677	3.14625	1.55324
Bahrain	2090	SSP1	228000000000	1960715	116116	3.33096	1.62888
Bahrain	2095	SSP1	230000000000	1875532	122705	3.51999	1.70628
Bahrain	2100	SSP1	232000000000	1791705	129348	3.71055	1.78432
Bahrain	2020	SSP2	70909900000	1494035	47462	1.36152	0.8213
Bahrain	2025	SSP2	83789100000	1624110	51590.8	1.47996	0.869952
Bahrain	2030	SSP2	96292900000	1744216	55207	1.5837	0.912568
Bahrain	2035	SSP2	110000000000	1856027	59388.7	1.70366	0.961827
Bahrain	2040	SSP2	123000000000	1962217	62605.7	1.79594	0.999739
Bahrain	2045	SSP2	135000000000	2061001	65286.7	1.87285	1.03134
Bahrain	2050	SSP2	146000000000	2148983	67852.1	1.94644	1.06158
Bahrain	2055	SSP2	158000000000	2220680	70949.9	2.03531	1.09806
Bahrain	2060	SSP2	170000000000	2274202	74715	2.14331	1.14237
Bahrain	2065	SSP2	182000000000	2302458	79215.3	2.27241	1.19531
Bahrain	2070	SSP2	193000000000	2306893	83731.2	2.40196	1.24841
Bahrain	2075	SSP2	202000000000	2290422	88401.6	2.53594	1.3033
Bahrain	2080	SSP2	211000000000	2257669	93277.6	2.67581	1.36061
Bahrain	2085	SSP2	218000000000	2215613	98394.4	2.8226	1.42073
Bahrain	2090	SSP2	225000000000	2170595	103819	2.97821	1.48447
Bahrain	2095	SSP2	233000000000	2124603	109588	3.14371	1.55227
Bahrain	2100	SSP2	240000000000	2074020	115732	3.31994	1.62446
Bahrain	2020	SSP3	70909900000	1494035	47462	1.36152	0.8213
Bahrain	2025	SSP3	83789100000	1600218	52361.1	1.50206	0.878988
Bahrain	2030	SSP3	95998000000	1697557	56550.7	1.62224	0.928328
Bahrain	2035	SSP3	108000000000	1787644	60249.1	1.72834	0.971887
Bahrain	2040	SSP3	116000000000	1873790	62166.5	1.78334	0.994502
Bahrain	2045	SSP3	123000000000	1951876	62958.9	1.80607	1.00388
Bahrain	2050	SSP3	128000000000	2018732	63187.7	1.81264	1.00663
Bahrain	2055	SSP3	132000000000	2069061	63559.8	1.82331	1.01104
Bahrain	2060	SSP3	135000000000	2102250	64116.5	1.83928	1.01762
Bahrain	2065	SSP3	137000000000	2115625	64843.2	1.86013	1.02617
Bahrain	2070	SSP3	138000000000	2114315	65126.1	1.86824	1.0295
Bahrain	2075	SSP3	137000000000	2106351	65108.3	1.86773	1.02928
Bahrain	2080	SSP3	136000000000	2100577	64872.7	1.86097	1.02651
Bahrain	2085	SSP3	136000000000	2104070	64505.5	1.85044	1.02219
Bahrain	2090	SSP3	136000000000	2116617	64134.9	1.83981	1.01785
Bahrain	2095	SSP3	136000000000	2131991	63822.5	1.83085	1.01419
Bahrain	2100	SSP3	136000000000	2143455	63562.3	1.82338	1.01114
Bahrain	2020	SSP4	70909900000	1494035	47462	1.36152	0.8213
Bahrain	2025	SSP4	83789100000	1629336	51425.3	1.47521	0.86801
Bahrain	2030	SSP4	96410100000	1759350	54798.7	1.57198	0.907781
Bahrain	2035	SSP4	111000000000	1884737	58990.7	1.69224	0.957172
Bahrain	2040	SSP4	126000000000	2007227	62638.2	1.79687	1.00016
Bahrain	2045	SSP4	140000000000	2120649	66220.3	1.89963	1.04237
Bahrain	2050	SSP4	155000000000	2223950	69756.1	2.00106	1.08403
Bahrain	2055	SSP4	171000000000	2312095	73815.3	2.1175	1.13183
Bahrain	2060	SSP4	187000000000	2384517	78441.9	2.25023	1.18628
Bahrain	2065	SSP4	204000000000	2433758	83735.5	2.40208	1.24856
Bahrain	2070	SSP4	219000000000	2463520	89026.7	2.55387	1.3108
Bahrain	2075	SSP4	234000000000	2480401	94453.3	2.70954	1.37461
Bahrain	2080	SSP4	249000000000	2492087	100082	2.871	1.4408
Bahrain	2085	SSP4	266000000000	2505098	105992	3.04055	1.5103
Bahrain	2090	SSP4	283000000000	2519071	112342	3.22271	1.58497
Bahrain	2095	SSP4	301000000000	2528117	119242	3.42063	1.6661
Bahrain	2100	SSP4	320000000000	2526030	126738	3.63568	1.75424
Bahrain	2020	SSP5	70909900000	1494035	47462	1.36152	0.8213
Bahrain	2025	SSP5	83789100000	1674728	50031.5	1.43523	0.85166
Bahrain	2030	SSP5	96801300000	1843024	52523.1	1.5067	0.881095
Bahrain	2035	SSP5	115000000000	2000490	57480.4	1.64891	0.939511
Bahrain	2040	SSP5	136000000000	2148749	63435.5	1.81974	1.00965
Bahrain	2045	SSP5	161000000000	2288582	70184.9	2.01336	1.08912
Bahrain	2050	SSP5	186000000000	2416576	77110.8	2.21204	1.17066
Bahrain	2055	SSP5	214000000000	2527324	84819.4	2.43317	1.26138
Bahrain	2060	SSP5	245000000000	2618093	93714.4	2.68834	1.36604
Bahrain	2065	SSP5	279000000000	2676821	104086	2.98587	1.48803
Bahrain	2070	SSP5	311000000000	2704228	115153	3.30335	1.61818
Bahrain	2075	SSP5	343000000000	2701360	127126	3.6468	1.75894
Bahrain	2080	SSP5	374000000000	2669053	140103	4.01908	1.9115
Bahrain	2085	SSP5	403000000000	2610837	154210	4.42374	2.0773
Bahrain	2090	SSP5	430000000000	2533196	169568	4.86431	2.25781
Bahrain	2095	SSP5	455000000000	2443893	186198	5.34137	2.45326
Bahrain	2100	SSP5	479000000000	2345393	204127	5.85568	2.66398
Bangladesh	2020	SSP1	1000000000000	166426991	6005.85	0.172287	0.5189
Bangladesh	2025	SSP1	1370000000000	174894340	7841.88	0.224956	0.547511
Bangladesh	2030	SSP1	1930000000000	181603234	10634.5	0.305067	0.585911
Bangladesh	2035	SSP1	2640000000000	186293089	14182.4	0.406843	0.631515
Bangladesh	2040	SSP1	3460000000000	189136811	18314.3	0.525372	0.682454
Bangladesh	2045	SSP1	4380000000000	190648310	22956.7	0.658547	0.738291
Bangladesh	2050	SSP1	5300000000000	190874384	27792.9	0.797281	0.79534
Bangladesh	2055	SSP1	6220000000000	189895986	32772.7	0.940134	0.853078
Bangladesh	2060	SSP1	7140000000000	187700819	38046	1.09141	0.913258
Bangladesh	2065	SSP1	8070000000000	184555269	43718	1.25412	0.977336
Bangladesh	2070	SSP1	8950000000000	180550085	49579.4	1.42226	1.04293
Bangladesh	2075	SSP1	9790000000000	175753220	55676.4	1.59716	1.11063
Bangladesh	2080	SSP1	10500000000000	170282878	61806	1.773	1.17816
Bangladesh	2085	SSP1	11100000000000	164263045	67873.5	1.94705	1.24451
Bangladesh	2090	SSP1	11700000000000	157793158	73956.9	2.12157	1.31067
Bangladesh	2095	SSP1	12100000000000	150952818	80143.6	2.29904	1.37773
Bangladesh	2100	SSP1	12400000000000	143871223	86427.3	2.4793	1.44574
Bangladesh	2020	SSP2	1000000000000	166426991	6005.85	0.172287	0.5189
Bangladesh	2025	SSP2	1370000000000	175528001	7813.57	0.224144	0.547704
Bangladesh	2030	SSP2	1930000000000	183373437	10504.4	0.301334	0.585849
Bangladesh	2035	SSP2	2560000000000	189547844	13526.1	0.388016	0.626499
Bangladesh	2040	SSP2	3220000000000	194161517	16594.3	0.476034	0.666401
Bangladesh	2045	SSP2	3910000000000	197348858	19835.4	0.56901	0.707152
Bangladesh	2050	SSP2	4640000000000	199283419	23306.5	0.668581	0.749567
Bangladesh	2055	SSP2	5410000000000	200108812	27037.5	0.775612	0.794119
Bangladesh	2060	SSP2	6210000000000	199771685	31103.6	0.892253	0.841646
Bangladesh	2065	SSP2	7060000000000	198396591	35580.7	1.02069	0.893144
Bangladesh	2070	SSP2	7910000000000	196092233	40318.7	1.1566	0.946939
Bangladesh	2075	SSP2	8750000000000	193032804	45340.1	1.30065	1.00344
Bangladesh	2080	SSP2	9560000000000	189393574	50486.1	1.44827	1.06093
Bangladesh	2085	SSP2	10300000000000	185262633	55704.7	1.59797	1.11886
Bangladesh	2090	SSP2	11000000000000	180753927	61064.8	1.75174	1.17814
Bangladesh	2095	SSP2	11700000000000	176005054	66636.2	1.91156	1.2397
Bangladesh	2100	SSP2	12400000000000	171297294	72393.4	2.07672	1.30349
Bangladesh	2020	SSP3	1000000000000	166426991	6005.85	0.172287	0.5189
Bangladesh	2025	SSP3	1370000000000	176575813	7767.2	0.222814	0.548028
Bangladesh	2030	SSP3	1920000000000	186096450	10325.1	0.296191	0.586
Bangladesh	2035	SSP3	2490000000000	194335547	12791.3	0.366939	0.621832
Bangladesh	2040	SSP3	2970000000000	201377627	14724.6	0.422397	0.650404
Bangladesh	2045	SSP3	3360000000000	207031763	16246.8	0.466065	0.672992
Bangladesh	2050	SSP3	3720000000000	211617017	17591	0.504625	0.6926
Bangladesh	2055	SSP3	4060000000000	215347594	18835.9	0.540337	0.710332
Bangladesh	2060	SSP3	4360000000000	218128580	20008.4	0.573972	0.726424
Bangladesh	2065	SSP3	4650000000000	219850083	21161.5	0.60705	0.74141
Bangladesh	2070	SSP3	4900000000000	220624331	22220	0.637416	0.754497
Bangladesh	2075	SSP3	5120000000000	220714100	23197.3	0.66545	0.766062
Bangladesh	2080	SSP3	5290000000000	220394106	24024	0.689165	0.775516
Bangladesh	2085	SSP3	5430000000000	219787219	24705.9	0.708726	0.78303
Bangladesh	2090	SSP3	5540000000000	218994140	25299.1	0.725744	0.789347
Bangladesh	2095	SSP3	5640000000000	218202296	25846.2	0.741438	0.795122
Bangladesh	2100	SSP3	5740000000000	217802343	26338.1	0.755547	0.800574
Bangladesh	2020	SSP4	1000000000000	166426991	6005.85	0.172287	0.5189
Bangladesh	2025	SSP4	1370000000000	176097741	7788.29	0.223419	0.547879
Bangladesh	2030	SSP4	1920000000000	185074660	10390.1	0.298057	0.585917
Bangladesh	2035	SSP4	2520000000000	192711073	13058.3	0.374597	0.623623
Bangladesh	2040	SSP4	3070000000000	199105038	15420.5	0.442359	0.6567
Bangladesh	2045	SSP4	3590000000000	204076976	17592.5	0.504669	0.686363
Bangladesh	2050	SSP4	4110000000000	207947672	19775.9	0.567303	0.715245
Bangladesh	2055	SSP4	4650000000000	210938150	22047.4	0.632462	0.744432
Bangladesh	2060	SSP4	5210000000000	212966151	24444.4	0.701224	0.774297
Bangladesh	2065	SSP4	5790000000000	214001794	27041.1	0.775715	0.805687
Bangladesh	2070	SSP4	6370000000000	214167609	29751.1	0.853457	0.837687
Bangladesh	2075	SSP4	6970000000000	213712594	32596.8	0.93509	0.870768
Bangladesh	2080	SSP4	7550000000000	212913822	35477.7	1.01773	0.903977
Bangladesh	2085	SSP4	8130000000000	211911817	38385.6	1.10115	0.937335
Bangladesh	2090	SSP4	8730000000000	210820792	41390.2	1.18734	0.971756
Bangladesh	2095	SSP4	9350000000000	209832693	44556.6	1.27818	1.00817
Bangladesh	2100	SSP4	10000000000000	209321649	47873.2	1.37332	1.04674
Bangladesh	2020	SSP5	1000000000000	166426991	6005.85	0.172287	0.5189
Bangladesh	2025	SSP5	1370000000000	173930150	7885.35	0.226203	0.547222
Bangladesh	2030	SSP5	1940000000000	179578395	10788.2	0.309476	0.586038
Bangladesh	2035	SSP5	2740000000000	183159934	14971.8	0.42949	0.638198
Bangladesh	2040	SSP5	3780000000000	184888381	20469.9	0.587211	0.704275
Bangladesh	2045	SSP5	4990000000000	185294007	26944.3	0.772937	0.780733
Bangladesh	2050	SSP5	6220000000000	184437513	33713	0.96711	0.859606
Bangladesh	2055	SSP5	7450000000000	182414112	40824.9	1.17112	0.941544
Bangladesh	2060	SSP5	8720000000000	179230991	48624.8	1.39488	1.03061
Bangladesh	2065	SSP5	10100000000000	175278818	57373.2	1.64584	1.13019
Bangladesh	2070	SSP5	11400000000000	170652729	66881.4	1.9186	1.23814
Bangladesh	2075	SSP5	12800000000000	165421220	77279.7	2.21689	1.35606
Bangladesh	2080	SSP5	14100000000000	159702089	88345.1	2.53431	1.48142
Bangladesh	2085	SSP5	15400000000000	153619531	99982.7	2.86816	1.6132
Bangladesh	2090	SSP5	16500000000000	147273393	112338	3.22259	1.7532
Bangladesh	2095	SSP5	17700000000000	140739932	125591	3.60276	1.9036
Bangladesh	2100	SSP5	18800000000000	134132707	139787	4.01	2.06503
Barbados	2020	SSP1	3877970000	280426	13828.9	0.396702	0.7279
Barbados	2025	SSP1	4743680000	282064	16817.7	0.482443	0.763043
Barbados	2030	SSP1	5255940000	282577	18600	0.53357	0.783998
Barbados	2035	SSP1	5930610000	281830	21043.2	0.603657	0.812723
Barbados	2040	SSP1	6844980000	279716	24471.2	0.701993	0.853026
Barbados	2045	SSP1	7944180000	276885	28691.3	0.823053	0.90264
Barbados	2050	SSP1	9117100000	273277	33362.1	0.957043	0.957555
Barbados	2055	SSP1	10317000000	268972	38357.2	1.10033	1.01628
Barbados	2060	SSP1	11562000000	264180	43765.6	1.25548	1.07987
Barbados	2065	SSP1	12855000000	259095	49615	1.42328	1.14863
Barbados	2070	SSP1	14149900000	253886	55733.3	1.59879	1.22057
Barbados	2075	SSP1	15425900000	248597	62051.8	1.78005	1.29485
Barbados	2080	SSP1	16660900000	243098	68535.7	1.96605	1.37108
Barbados	2085	SSP1	17833400000	237058	75228	2.15803	1.44976
Barbados	2090	SSP1	18921900000	230327	82152.3	2.35667	1.53117
Barbados	2095	SSP1	19897300000	222636	89371.4	2.56376	1.61604
Barbados	2100	SSP1	20681900000	213275	96972.9	2.78182	1.7054
Barbados	2020	SSP2	3877970000	280426	13828.9	0.396702	0.7279
Barbados	2025	SSP2	4743680000	282569	16787.7	0.48158	0.76269
Barbados	2030	SSP2	5248550000	284049	18477.6	0.530059	0.78256
Barbados	2035	SSP2	5821010000	284546	20457.2	0.586846	0.805835
Barbados	2040	SSP2	6512330000	283905	22938.4	0.658023	0.835008
Barbados	2045	SSP2	7306020000	282393	25871.8	0.742173	0.869496
Barbados	2050	SSP2	8194430000	280221	29242.7	0.838873	0.909127
Barbados	2055	SSP2	9167390000	277932	32984.3	0.946205	0.953116
Barbados	2060	SSP2	10239900000	275929	37110.6	1.06458	1.00163
Barbados	2065	SSP2	11412000000	274004	41649	1.19477	1.05499
Barbados	2070	SSP2	12652600000	272080	46503.2	1.33402	1.11206
Barbados	2075	SSP2	13956600000	270097	51672.5	1.48231	1.17284
Barbados	2080	SSP2	15313000000	267976	57143.2	1.63924	1.23715
Barbados	2085	SSP2	16716900000	265513	62960.8	1.80613	1.30555
Barbados	2090	SSP2	18165400000	262778	69128.3	1.98305	1.37806
Barbados	2095	SSP2	19655200000	259770	75663.9	2.17053	1.4549
Barbados	2100	SSP2	21174100000	256305	82612.9	2.36988	1.5366
Barbados	2020	SSP3	3877970000	280426	13828.9	0.396702	0.7279
Barbados	2025	SSP3	4743680000	283281	16745.5	0.48037	0.762194
Barbados	2030	SSP3	5239660000	285817	18332.2	0.525888	0.780852
Barbados	2035	SSP3	5687850000	287629	19775	0.567275	0.797817
Barbados	2040	SSP3	6096550000	288462	21134.7	0.60628	0.813804
Barbados	2045	SSP3	6443390000	288070	22367.4	0.641644	0.828298
Barbados	2050	SSP3	6777340000	287018	23612.9	0.677373	0.842941
Barbados	2055	SSP3	7111680000	286390	24832.2	0.712348	0.857275
Barbados	2060	SSP3	7452150000	286937	25971.4	0.745029	0.87067
Barbados	2065	SSP3	7802610000	288483	27047	0.775886	0.883318
Barbados	2070	SSP3	8154170000	290772	28043.2	0.804461	0.895032
Barbados	2075	SSP3	8517100000	293469	29022.1	0.832545	0.906545
Barbados	2080	SSP3	8892330000	296466	29994.4	0.860436	0.917979
Barbados	2085	SSP3	9280510000	299647	30971.5	0.888464	0.929469
Barbados	2090	SSP3	9682070000	303333	31918.9	0.915644	0.940612
Barbados	2095	SSP3	10099100000	307489	32843.8	0.942174	0.951489
Barbados	2100	SSP3	10537200000	311988	33774.4	0.96887	0.962434
Barbados	2020	SSP4	3877970000	280426	13828.9	0.396702	0.7279
Barbados	2025	SSP4	4743680000	283088	16756.9	0.480698	0.762329
Barbados	2030	SSP4	5254530000	285617	18397.1	0.52775	0.781615
Barbados	2035	SSP4	5914380000	287532	20569.5	0.590067	0.807158
Barbados	2040	SSP4	6822910000	288599	23641.5	0.678192	0.843278
Barbados	2045	SSP4	7944850000	288623	27526.7	0.789647	0.888958
Barbados	2050	SSP4	9194620000	288205	31903.1	0.915188	0.940412
Barbados	2055	SSP4	10557900000	288307	36620.3	1.05051	0.995875
Barbados	2060	SSP4	12051900000	289595	41616.4	1.19383	1.05462
Barbados	2065	SSP4	13692200000	291757	46930.2	1.34626	1.11709
Barbados	2070	SSP4	15466100000	294537	52509.9	1.50633	1.1827
Barbados	2075	SSP4	17394200000	297611	58446.1	1.67662	1.2525
Barbados	2080	SSP4	19482700000	300836	64761.9	1.85779	1.32676
Barbados	2085	SSP4	21739400000	304105	71486.5	2.0507	1.40582
Barbados	2090	SSP4	24173200000	307614	78582.9	2.25427	1.48926
Barbados	2095	SSP4	26796300000	311326	86071.5	2.46909	1.57731
Barbados	2100	SSP4	29631300000	315091	94040.5	2.69769	1.67101
Barbados	2020	SSP5	3877970000	280426	13828.9	0.396702	0.7279
Barbados	2025	SSP5	4743680000	281487	16852.2	0.483432	0.763448
Barbados	2030	SSP5	5266830000	281658	18699.4	0.53642	0.785166
Barbados	2035	SSP5	6098030000	280874	21710.9	0.622811	0.820573
Barbados	2040	SSP5	7369470000	279071	26407.2	0.75753	0.875787
Barbados	2045	SSP5	8975210000	276922	32410.6	0.929748	0.94637
Barbados	2050	SSP5	10716200000	274354	39059.8	1.12049	1.02454
Barbados	2055	SSP5	12568700000	271319	46324.4	1.32889	1.10996
Barbados	2060	SSP5	14591600000	267921	54462.3	1.56234	1.20563
Barbados	2065	SSP5	16813000000	264186	63640.8	1.82563	1.31355
Barbados	2070	SSP5	19184800000	260296	73703.8	2.11431	1.43186
Barbados	2075	SSP5	21686000000	256231	84634.6	2.42787	1.56037
Barbados	2080	SSP5	24290300000	251824	96457.4	2.76703	1.69937
Barbados	2085	SSP5	26970800000	246744	109307	3.13563	1.85045
Barbados	2090	SSP5	29694900000	240799	123318	3.53757	2.01518
Barbados	2095	SSP5	32413000000	233756	138662	3.97772	2.19557
Barbados	2100	SSP5	34984100000	224873	155573	4.46284	2.39439
Belize	2020	SSP1	3042180000	392424	7752.28	0.222386	0.4548
Belize	2025	SSP1	4340840000	421717	10293.3	0.295278	0.4847
Belize	2030	SSP1	4965880000	448621	11069.2	0.317537	0.493845
Belize	2035	SSP1	5950040000	471155	12628.6	0.362271	0.512199
Belize	2040	SSP1	7345980000	489325	15012.5	0.430656	0.540242
Belize	2045	SSP1	9194680000	504812	18214.1	0.522498	0.577897
Belize	2050	SSP1	11420500000	517707	22059.8	0.632818	0.623123
Belize	2055	SSP1	13991300000	527771	26510.2	0.760485	0.675457
Belize	2060	SSP1	16929400000	534873	31651.3	0.907965	0.735908
Belize	2065	SSP1	20223400000	538859	37530	1.07661	0.805031
Belize	2070	SSP1	23757800000	539896	44004.4	1.26233	0.881153
Belize	2075	SSP1	27452200000	538031	51023.5	1.46369	0.963678
Belize	2080	SSP1	31183300000	533503	58450.1	1.67673	1.05099
Belize	2085	SSP1	34864300000	526267	66248.3	1.90043	1.14267
Belize	2090	SSP1	38411500000	516197	74412.5	2.13464	1.23865
Belize	2095	SSP1	41739600000	503181	82951.5	2.37959	1.33904
Belize	2100	SSP1	44743400000	487053	91865.6	2.6353	1.44383
Belize	2020	SSP2	3042180000	392424	7752.28	0.222386	0.4548
Belize	2025	SSP2	4340840000	423803	10242.6	0.293824	0.484106
Belize	2030	SSP2	4970820000	454709	10931.9	0.313597	0.492235
Belize	2035	SSP2	5918740000	482360	12270.4	0.351995	0.507996
Belize	2040	SSP2	7141210000	506596	14096.5	0.404379	0.529486
Belize	2045	SSP2	8657270000	528199	16390.2	0.470177	0.556472
Belize	2050	SSP2	10491000000	547594	19158.4	0.549587	0.589035
Belize	2055	SSP2	12663600000	564693	22425.6	0.643314	0.627464
Belize	2060	SSP2	15216600000	579451	26260.4	0.753319	0.672562
Belize	2065	SSP2	18172100000	591211	30737.1	0.88174	0.725207
Belize	2070	SSP2	21474100000	599852	35799	1.02695	0.784729
Belize	2075	SSP2	25090900000	605154	41462	1.1894	0.851316
Belize	2080	SSP2	28952200000	607607	47649.5	1.3669	0.924067
Belize	2085	SSP2	33017500000	607430	54356.1	1.55929	1.00292
Belize	2090	SSP2	37256300000	604987	61582	1.76657	1.08787
Belize	2095	SSP2	41656000000	600637	69353	1.9895	1.17924
Belize	2100	SSP2	46197000000	594581	77696.7	2.22885	1.27733
Belize	2020	SSP3	3042180000	392424	7752.28	0.222386	0.4548
Belize	2025	SSP3	4340840000	423837	10241.8	0.293801	0.484096
Belize	2030	SSP3	4966610000	456486	10880.1	0.312112	0.491628
Belize	2035	SSP3	5813480000	487472	11925.8	0.342109	0.503948
Belize	2040	SSP3	6738440000	516445	13047.7	0.374294	0.517164
Belize	2045	SSP3	7678620000	543329	14132.5	0.405414	0.529941
Belize	2050	SSP3	8664130000	569226	15220.9	0.436635	0.542758
Belize	2055	SSP3	9708610000	594356	16334.7	0.468585	0.555874
Belize	2060	SSP3	10816600000	618747	17481.5	0.501482	0.569378
Belize	2065	SSP3	11997800000	641432	18704.7	0.536573	0.583779
Belize	2070	SSP3	13228300000	662302	19973.2	0.572962	0.59871
Belize	2075	SSP3	14511300000	681311	21299.1	0.610997	0.614315
Belize	2080	SSP3	15829200000	699123	22641.5	0.649506	0.630113
Belize	2085	SSP3	17189300000	716152	24002.3	0.688543	0.646127
Belize	2090	SSP3	18606500000	732843	25389.5	0.728336	0.66245
Belize	2095	SSP3	20105900000	749497	26825.9	0.769541	0.679352
Belize	2100	SSP3	21707300000	766085	28335.4	0.812843	0.697114
Belize	2020	SSP4	3042180000	392424	7752.28	0.222386	0.4548
Belize	2025	SSP4	4340840000	425946	10191.1	0.292346	0.483502
Belize	2030	SSP4	4976030000	461212	10789	0.3095	0.490561
Belize	2035	SSP4	5969880000	494811	12065	0.346102	0.505591
Belize	2040	SSP4	7337620000	526166	13945.4	0.400046	0.527727
Belize	2045	SSP4	9146180000	555091	16476.9	0.472665	0.557514
Belize	2050	SSP4	11409700000	583061	19568.6	0.561356	0.593888
Belize	2055	SSP4	14156200000	610268	23196.7	0.665433	0.636567
Belize	2060	SSP4	17430300000	636618	27379.5	0.785424	0.685768
Belize	2065	SSP4	21285400000	660880	32207.7	0.923926	0.742555
Belize	2070	SSP4	25707500000	682875	37646	1.07993	0.806513
Belize	2075	SSP4	30711600000	702559	43713.9	1.254	0.877873
Belize	2080	SSP4	36262500000	720560	50325.4	1.44366	0.955622
Belize	2085	SSP4	42364900000	737324	57457.6	1.64826	1.03949
Belize	2090	SSP4	49046200000	753251	65112.7	1.86786	1.12951
Belize	2095	SSP4	56370500000	768614	73340.5	2.10388	1.22626
Belize	2100	SSP4	64401600000	783390	82208.9	2.35829	1.33054
Belize	2020	SSP5	3042180000	392424	7752.28	0.222386	0.4548
Belize	2025	SSP5	4340840000	425081	10211.8	0.292941	0.483745
Belize	2030	SSP5	4978000000	455255	10934.5	0.313674	0.492267
Belize	2035	SSP5	6125670000	480940	12736.9	0.365377	0.513479
Belize	2040	SSP5	7971220000	502121	15875.1	0.455401	0.550394
Belize	2045	SSP5	10594000000	520484	20354.1	0.583889	0.603071
Belize	2050	SSP5	13842400000	536145	25818.4	0.74064	0.66733
Belize	2055	SSP5	17718800000	548871	32282.3	0.926066	0.743339
Belize	2060	SSP5	22317800000	558511	39959.5	1.1463	0.833611
Belize	2065	SSP5	27682800000	564658	49025.8	1.40638	0.940212
Belize	2070	SSP5	33711800000	567505	59403.5	1.70408	1.06223
Belize	2075	SSP5	40336700000	567145	71122.4	2.04025	1.20001
Belize	2080	SSP5	47420100000	563798	84108.3	2.41278	1.35269
Belize	2085	SSP5	54862500000	557435	98419.5	2.82332	1.52095
Belize	2090	SSP5	62552600000	547974	114152	3.27464	1.70592
Belize	2095	SSP5	70358000000	535312	131434	3.77037	1.90909
Belize	2100	SSP5	78093500000	519315	150378	4.31382	2.13181
Benin	2020	SSP1	40287000000	12466822	3231.54	0.0927016	0.4039
Benin	2025	SSP1	54511200000	14132362	3857.19	0.110649	0.412638
Benin	2030	SSP1	73828600000	15721397	4696.06	0.134714	0.423819
Benin	2035	SSP1	102000000000	17226934	5902.5	0.169322	0.439252
Benin	2040	SSP1	137000000000	18635723	7347.56	0.210776	0.457411
Benin	2045	SSP1	182000000000	19991064	9082.16	0.260536	0.47893
Benin	2050	SSP1	236000000000	21241119	11104.6	0.318552	0.503746
Benin	2055	SSP1	301000000000	22322250	13480.4	0.386705	0.532575
Benin	2060	SSP1	379000000000	23198535	16330.9	0.468476	0.566817
Benin	2065	SSP1	471000000000	23929710	19688.5	0.564796	0.606901
Benin	2070	SSP1	578000000000	24502030	23569.8	0.676136	0.653009
Benin	2075	SSP1	697000000000	24927635	27977.7	0.802584	0.705188
Benin	2080	SSP1	830000000000	25169643	32957.6	0.945439	0.763939
Benin	2085	SSP1	972000000000	25236804	38533.4	1.10539	0.829552
Benin	2090	SSP1	1130000000000	25124841	44824.6	1.28586	0.903427
Benin	2095	SSP1	1290000000000	24865505	51851.3	1.48744	0.985829
Benin	2100	SSP1	1460000000000	24478222	59645.7	1.71103	1.07715
Benin	2020	SSP2	40287000000	12466822	3231.54	0.0927016	0.4039
Benin	2025	SSP2	54511200000	14282402	3816.67	0.109487	0.412286
Benin	2030	SSP2	73843100000	16188294	4561.51	0.130854	0.422624
Benin	2035	SSP2	101000000000	18149674	5562.91	0.159581	0.436025
Benin	2040	SSP2	134000000000	20150897	6634.2	0.190312	0.450281
Benin	2045	SSP2	174000000000	22150927	7839.27	0.224881	0.466109
Benin	2050	SSP2	223000000000	24124734	9232.64	0.264852	0.484128
Benin	2055	SSP2	283000000000	26018254	10878.9	0.312078	0.505055
Benin	2060	SSP2	357000000000	27777822	12843.7	0.368441	0.529616
Benin	2065	SSP2	446000000000	29437378	15151.3	0.434639	0.558124
Benin	2070	SSP2	552000000000	30944002	17839.4	0.511751	0.590979
Benin	2075	SSP2	676000000000	32301941	20930.1	0.600413	0.628444
Benin	2080	SSP2	819000000000	33436751	24494.2	0.702652	0.671289
Benin	2085	SSP2	981000000000	34368729	28548.7	0.818964	0.719734
Benin	2090	SSP2	1160000000000	35077352	33183.8	0.951928	0.774818
Benin	2095	SSP2	1370000000000	35614166	38384.2	1.10111	0.836406
Benin	2100	SSP2	1590000000000	36006835	44161.3	1.26684	0.904657
Benin	2020	SSP3	40287000000	12466822	3231.54	0.0927016	0.4039
Benin	2025	SSP3	54511200000	14381626	3790.34	0.108732	0.412058
Benin	2030	SSP3	73773400000	16511713	4467.94	0.12817	0.421792
Benin	2035	SSP3	99405400000	18838329	5276.76	0.151372	0.433232
Benin	2040	SSP3	128000000000	21362975	5978.1	0.171491	0.443572
Benin	2045	SSP3	159000000000	23967063	6619.71	0.189897	0.453276
Benin	2050	SSP3	193000000000	26667628	7248.41	0.207932	0.462909
Benin	2055	SSP3	233000000000	29437765	7902.88	0.226706	0.472901
Benin	2060	SSP3	277000000000	32225299	8590.77	0.246439	0.483302
Benin	2065	SSP3	326000000000	35038619	9311.84	0.267124	0.494114
Benin	2070	SSP3	381000000000	37769111	10085	0.289303	0.505469
Benin	2075	SSP3	441000000000	40411677	10910	0.312971	0.517362
Benin	2080	SSP3	506000000000	42836858	11817.4	0.338999	0.530041
Benin	2085	SSP3	577000000000	45086872	12787.4	0.366827	0.543313
Benin	2090	SSP3	652000000000	47122990	13840.8	0.397046	0.557388
Benin	2095	SSP3	732000000000	49020219	14942.4	0.428645	0.571913
Benin	2100	SSP3	817000000000	50816910	16083.1	0.461369	0.586816
Benin	2020	SSP4	40287000000	12466822	3231.54	0.0927016	0.4039
Benin	2025	SSP4	54511200000	14395399	3786.71	0.108628	0.412027
Benin	2030	SSP4	73821400000	16554204	4459.37	0.127924	0.421727
Benin	2035	SSP4	100000000000	18917816	5302.78	0.152118	0.433604
Benin	2040	SSP4	131000000000	21481488	6104.33	0.175112	0.445155
Benin	2045	SSP4	167000000000	24118449	6924.91	0.198652	0.45699
Benin	2050	SSP4	210000000000	26846850	7823.3	0.224423	0.469817
Benin	2055	SSP4	262000000000	29640681	8851.99	0.253933	0.484229
Benin	2060	SSP4	326000000000	32446932	10033.6	0.287828	0.500449
Benin	2065	SSP4	402000000000	35277338	11384.7	0.326587	0.518683
Benin	2070	SSP4	492000000000	38017775	12950.3	0.371499	0.539364
Benin	2075	SSP4	600000000000	40664410	14754	0.42324	0.562766
Benin	2080	SSP4	727000000000	43086130	16864.8	0.483793	0.589593
Benin	2085	SSP4	874000000000	45330222	19284	0.553192	0.619898
Benin	2090	SSP4	1050000000000	47363276	22072.2	0.633174	0.654366
Benin	2095	SSP4	1240000000000	49260479	25206.4	0.723085	0.692791
Benin	2100	SSP4	1470000000000	51058952	28701.7	0.823353	0.735378
Benin	2020	SSP5	40287000000	12466822	3231.54	0.0927016	0.4039
Benin	2025	SSP5	54511200000	14132765	3857.08	0.110646	0.412637
Benin	2030	SSP5	73880200000	15711693	4702.24	0.134891	0.423884
Benin	2035	SSP5	103000000000	17195720	6017.66	0.172626	0.440581
Benin	2040	SSP5	145000000000	18572381	7803.79	0.223864	0.462723
Benin	2045	SSP5	202000000000	19885143	10134	0.290711	0.49121
Benin	2050	SSP5	273000000000	21082816	12938.5	0.371161	0.525176
Benin	2055	SSP5	361000000000	22103320	16322.9	0.468247	0.565815
Benin	2060	SSP5	470000000000	22912612	20499.3	0.588053	0.615589
Benin	2065	SSP5	603000000000	23576821	25584.2	0.733921	0.675925
Benin	2070	SSP5	763000000000	24085325	31676.2	0.908681	0.747974
Benin	2075	SSP5	950000000000	24452904	38862.4	1.11483	0.83277
Benin	2080	SSP5	1170000000000	24645992	47293.3	1.35668	0.932056
Benin	2085	SSP5	1410000000000	24675368	57103.9	1.63811	1.04743
Benin	2090	SSP5	1680000000000	24538362	68587.7	1.96754	1.18233
Benin	2095	SSP5	1990000000000	24266759	81913.3	2.34981	1.33878
Benin	2100	SSP5	2320000000000	23879925	97278.8	2.79059	1.51912
Bhutan	2020	SSP1	8400820000	769997	10910.2	0.312976	0.5777
Bhutan	2025	SSP1	9655270000	795072	12143.9	0.348366	0.592226
Bhutan	2030	SSP1	11708800000	814923	14368	0.412168	0.618392
Bhutan	2035	SSP1	13918100000	829171	16785.6	0.481519	0.646828
Bhutan	2040	SSP1	16411900000	837472	19597	0.562169	0.67989
Bhutan	2045	SSP1	19243800000	841175	22877.3	0.65627	0.718461
Bhutan	2050	SSP1	22225900000	839849	26464.2	0.759165	0.760632
Bhutan	2055	SSP1	25389600000	833561	30459.2	0.873769	0.807598
Bhutan	2060	SSP1	28755400000	822429	34964	1.003	0.860554
Bhutan	2065	SSP1	32301500000	806398	40056.5	1.14908	0.920415
Bhutan	2070	SSP1	35698000000	785150	45466.5	1.30428	0.984005
Bhutan	2075	SSP1	38769400000	758756	51096	1.46577	1.05017
Bhutan	2080	SSP1	41381900000	728001	56843.2	1.63063	1.11772
Bhutan	2085	SSP1	43419100000	694083	62556.1	1.79452	1.18486
Bhutan	2090	SSP1	45001400000	658462	68343.2	1.96053	1.25287
Bhutan	2095	SSP1	46196700000	622365	74227.7	2.12933	1.32203
Bhutan	2100	SSP1	47033600000	586280	80223.8	2.30134	1.3925
Bhutan	2020	SSP2	8400820000	769997	10910.2	0.312976	0.5777
Bhutan	2025	SSP2	9655270000	797728	12103.5	0.347206	0.591753
Bhutan	2030	SSP2	11698100000	822626	14220.4	0.407935	0.616663
Bhutan	2035	SSP2	13724100000	843414	16272.1	0.46679	0.640803
Bhutan	2040	SSP2	15770000000	858993	18358.7	0.526648	0.665349
Bhutan	2045	SSP2	17945700000	868655	20659.2	0.59264	0.692405
Bhutan	2050	SSP2	20293000000	872347	23262.5	0.667321	0.723016
Bhutan	2055	SSP2	22883300000	870574	26285.3	0.754034	0.758555
Bhutan	2060	SSP2	25701000000	863766	29754.6	0.853556	0.799339
Bhutan	2065	SSP2	28712200000	851500	33719.6	0.967297	0.845947
Bhutan	2070	SSP2	31677600000	833716	37995.7	1.08996	0.896208
Bhutan	2075	SSP2	34503400000	810923	42548.3	1.22056	0.949716
Bhutan	2080	SSP2	37122700000	784338	47330	1.35773	1.00591
Bhutan	2085	SSP2	39469700000	755339	52254.3	1.49899	1.06379
Bhutan	2090	SSP2	41655500000	725808	57391.9	1.64637	1.12417
Bhutan	2095	SSP2	43723400000	696548	62771.6	1.8007	1.18739
Bhutan	2100	SSP2	45707200000	668016	68422.3	1.9628	1.25381
Bhutan	2020	SSP3	8400820000	769997	10910.2	0.312976	0.5777
Bhutan	2025	SSP3	9655270000	799569	12075.6	0.346407	0.591427
Bhutan	2030	SSP3	11685800000	828429	14106	0.404652	0.615323
Bhutan	2035	SSP3	13484800000	855024	15771.3	0.452423	0.634924
Bhutan	2040	SSP3	14955000000	877804	17036.8	0.488728	0.649823
Bhutan	2045	SSP3	16153000000	893911	18070	0.518367	0.661984
Bhutan	2050	SSP3	17215900000	903576	19053.1	0.546567	0.67355
Bhutan	2055	SSP3	18224800000	907927	20073	0.575824	0.685545
Bhutan	2060	SSP3	19129000000	907962	21068.1	0.60437	0.697245
Bhutan	2065	SSP3	19900500000	903045	22037.1	0.632168	0.708634
Bhutan	2070	SSP3	20431600000	893207	22874.4	0.656188	0.718471
Bhutan	2075	SSP3	20752000000	879476	23595.9	0.676884	0.726941
Bhutan	2080	SSP3	20907900000	863871	24202.6	0.694288	0.734062
Bhutan	2085	SSP3	20940900000	848758	24672.4	0.707766	0.739573
Bhutan	2090	SSP3	20932000000	835778	25044.9	0.718452	0.743942
Bhutan	2095	SSP3	20917000000	825280	25345.3	0.72707	0.747466
Bhutan	2100	SSP3	20915700000	816872	25604.6	0.734508	0.750507
Bhutan	2020	SSP4	8400820000	769997	10910.2	0.312976	0.5777
Bhutan	2025	SSP4	9655270000	799892	12070.7	0.346267	0.591369
Bhutan	2030	SSP4	11691400000	829042	14102.3	0.404546	0.61528
Bhutan	2035	SSP4	13615500000	855861	15908.5	0.456361	0.636539
Bhutan	2040	SSP4	15386800000	878940	17506.1	0.502189	0.655341
Bhutan	2045	SSP4	17059500000	895558	19049	0.54645	0.673496
Bhutan	2050	SSP4	18765900000	905923	20714.7	0.594232	0.693088
Bhutan	2055	SSP4	20598800000	911153	22607.4	0.648528	0.715346
Bhutan	2060	SSP4	22515100000	912240	24681.1	0.708016	0.739728
Bhutan	2065	SSP4	24480700000	908426	26948.5	0.773058	0.766383
Bhutan	2070	SSP4	26353700000	899669	29292.7	0.840305	0.793938
Bhutan	2075	SSP4	28142900000	886784	31735.9	0.910393	0.822653
Bhutan	2080	SSP4	29875600000	871659	34274.4	0.983214	0.852487
Bhutan	2085	SSP4	31576700000	856353	36873.5	1.05777	0.883032
Bhutan	2090	SSP4	33338400000	842340	39578.3	1.13536	0.914823
Bhutan	2095	SSP4	35205200000	829889	42421.6	1.21693	0.948242
Bhutan	2100	SSP4	37209500000	818624	45453.7	1.30391	0.983883
Bhutan	2020	SSP5	8400820000	769997	10910.2	0.312976	0.5777
Bhutan	2025	SSP5	9655270000	795151	12142.7	0.348332	0.592212
Bhutan	2030	SSP5	11726000000	814665	14393.6	0.412904	0.618693
Bhutan	2035	SSP5	14251500000	828355	17204.6	0.49354	0.651754
Bhutan	2040	SSP5	17554700000	836116	20995.5	0.602289	0.696332
Bhutan	2045	SSP5	21597100000	839409	25728.9	0.738074	0.751988
Bhutan	2050	SSP5	25963000000	838002	30982	0.888767	0.813749
Bhutan	2055	SSP5	30738200000	831895	36949.6	1.05996	0.883907
Bhutan	2060	SSP5	36036300000	821263	43879.1	1.25874	0.965372
Bhutan	2065	SSP5	41884600000	805762	51981.4	1.49116	1.06062
Bhutan	2070	SSP5	47886600000	785141	60991.1	1.74962	1.16653
Bhutan	2075	SSP5	53809900000	759449	70853.9	2.03255	1.28247
Bhutan	2080	SSP5	59435800000	729511	81473.5	2.33719	1.40731
Bhutan	2085	SSP5	64554400000	696407	92696.4	2.65914	1.53923
Bhutan	2090	SSP5	69273800000	661501	104722	3.00411	1.6806
Bhutan	2095	SSP5	73626800000	625839	117645	3.37483	1.8325
Bhutan	2100	SSP5	77592700000	589714	131577	3.77448	1.99628
Bolivia	2020	SSP1	91668700000	11862352	7727.7	0.221681	0.6129
Bolivia	2025	SSP1	106000000000	12554825	8482.32	0.243328	0.622347
Bolivia	2030	SSP1	120000000000	13248955	9020.94	0.258779	0.629255
Bolivia	2035	SSP1	140000000000	13839262	10093.2	0.28954	0.642353
Bolivia	2040	SSP1	171000000000	14303482	11981.5	0.343707	0.664939
Bolivia	2045	SSP1	216000000000	14682179	14686.3	0.421299	0.697054
Bolivia	2050	SSP1	271000000000	14949619	18106.3	0.519406	0.737486
Bolivia	2055	SSP1	335000000000	15096366	22216.3	0.637308	0.785931
Bolivia	2060	SSP1	409000000000	15130428	27054.1	0.776088	0.842839
Bolivia	2065	SSP1	492000000000	15083429	32607.3	0.93539	0.908092
Bolivia	2070	SSP1	580000000000	14954664	38784.9	1.1126	0.980617
Bolivia	2075	SSP1	672000000000	14753427	45541.2	1.30642	1.05989
Bolivia	2080	SSP1	766000000000	14478994	52888.5	1.51719	1.14604
Bolivia	2085	SSP1	860000000000	14142399	60845.2	1.74544	1.23932
Bolivia	2090	SSP1	955000000000	13756288	69425.5	1.99158	1.33988
Bolivia	2095	SSP1	1050000000000	13332785	78609.2	2.25503	1.4475
Bolivia	2100	SSP1	1140000000000	12878381	88392.3	2.53567	1.56215
Bolivia	2020	SSP2	91668700000	11862352	7727.7	0.221681	0.6129
Bolivia	2025	SSP2	106000000000	12619884	8438.59	0.242074	0.621887
Bolivia	2030	SSP2	119000000000	13441895	8887.36	0.254948	0.627845
Bolivia	2035	SSP2	138000000000	14208900	9713	0.278632	0.638189
Bolivia	2040	SSP2	164000000000	14887058	11045.8	0.316867	0.654422
Bolivia	2045	SSP2	199000000000	15478812	12843	0.368422	0.676043
Bolivia	2050	SSP2	241000000000	15959772	15127.2	0.433947	0.703298
Bolivia	2055	SSP2	292000000000	16323379	17914.3	0.513899	0.736369
Bolivia	2060	SSP2	352000000000	16587176	21212.4	0.608509	0.775364
Bolivia	2065	SSP2	420000000000	16776150	25018.1	0.717682	0.820266
Bolivia	2070	SSP2	495000000000	16894956	29288.6	0.840189	0.870575
Bolivia	2075	SSP2	577000000000	16950125	34033.1	0.976291	0.926404
Bolivia	2080	SSP2	666000000000	16929754	39309.9	1.12766	0.988429
Bolivia	2085	SSP2	761000000000	16847473	45153.2	1.29529	1.05706
Bolivia	2090	SSP2	862000000000	16713304	51581.5	1.4797	1.13253
Bolivia	2095	SSP2	969000000000	16540171	58567.2	1.68009	1.21452
Bolivia	2100	SSP2	1080000000000	16335510	66112.4	1.89654	1.30306
Bolivia	2020	SSP3	91668700000	11862352	7727.7	0.221681	0.6129
Bolivia	2025	SSP3	106000000000	12699538	8385.66	0.240555	0.62133
Bolivia	2030	SSP3	119000000000	13671576	8735.06	0.250578	0.626245
Bolivia	2035	SSP3	136000000000	14658141	9285.76	0.266376	0.633538
Bolivia	2040	SSP3	156000000000	15616898	10019.2	0.287416	0.642957
Bolivia	2045	SSP3	178000000000	16506845	10799.2	0.30979	0.652865
Bolivia	2050	SSP3	202000000000	17300467	11649.5	0.334182	0.663521
Bolivia	2055	SSP3	226000000000	17999444	12552.3	0.360081	0.674716
Bolivia	2060	SSP3	251000000000	18645873	13437.7	0.38548	0.685662
Bolivia	2065	SSP3	275000000000	19256183	14273.7	0.409463	0.695998
Bolivia	2070	SSP3	298000000000	19834253	15033.6	0.431263	0.705412
Bolivia	2075	SSP3	321000000000	20380456	15743.8	0.451634	0.714214
Bolivia	2080	SSP3	343000000000	20877804	16440.1	0.471609	0.722814
Bolivia	2085	SSP3	366000000000	21342471	17129.9	0.491397	0.73131
Bolivia	2090	SSP3	388000000000	21798313	17804.7	0.510756	0.739622
Bolivia	2095	SSP3	411000000000	22263367	18444.8	0.529117	0.747534
Bolivia	2100	SSP3	433000000000	22734164	19056	0.54665	0.75511
Bolivia	2020	SSP4	91668700000	11862352	7727.7	0.221681	0.6129
Bolivia	2025	SSP4	106000000000	12691190	8391.18	0.240714	0.621388
Bolivia	2030	SSP4	119000000000	13661169	8743.91	0.250832	0.62634
Bolivia	2035	SSP4	137000000000	14639954	9365.53	0.268665	0.634461
Bolivia	2040	SSP4	160000000000	15576053	10299	0.295441	0.646212
Bolivia	2045	SSP4	188000000000	16428085	11441	0.328203	0.660347
Bolivia	2050	SSP4	220000000000	17167874	12834	0.368164	0.677339
Bolivia	2055	SSP4	258000000000	17800128	14474.6	0.415226	0.697152
Bolivia	2060	SSP4	299000000000	18374329	16298.7	0.467554	0.719075
Bolivia	2065	SSP4	346000000000	18907910	18282.7	0.524468	0.742844
Bolivia	2070	SSP4	396000000000	19401776	20403.2	0.585297	0.768185
Bolivia	2075	SSP4	451000000000	19855709	22705.6	0.651344	0.795632
Bolivia	2080	SSP4	511000000000	20253453	25254	0.724449	0.825924
Bolivia	2085	SSP4	579000000000	20613498	28074.2	0.805351	0.859382
Bolivia	2090	SSP4	653000000000	20960780	31167.8	0.894095	0.896042
Bolivia	2095	SSP4	736000000000	21312562	34512.7	0.990048	0.935661
Bolivia	2100	SSP4	826000000000	21661677	38133	1.0939	0.978516
Bolivia	2020	SSP5	91668700000	11862352	7727.7	0.221681	0.6129
Bolivia	2025	SSP5	106000000000	12512460	8511.04	0.244152	0.622649
Bolivia	2030	SSP5	120000000000	13154824	9091.57	0.260806	0.630008
Bolivia	2035	SSP5	142000000000	13686002	10402.2	0.298402	0.645858
Bolivia	2040	SSP5	183000000000	14086821	12958.6	0.371738	0.676248
Bolivia	2045	SSP5	242000000000	14399455	16813.8	0.48233	0.721834
Bolivia	2050	SSP5	317000000000	14600118	21739.7	0.623636	0.779916
Bolivia	2055	SSP5	408000000000	14680967	27762.6	0.796413	0.850797
Bolivia	2060	SSP5	513000000000	14651151	35029.5	1.00488	0.936212
Bolivia	2065	SSP5	635000000000	14548832	43625.8	1.25147	1.0372
Bolivia	2070	SSP5	769000000000	14374437	53529.7	1.53558	1.1535
Bolivia	2075	SSP5	916000000000	14138218	64774.7	1.85816	1.28551
Bolivia	2080	SSP5	1070000000000	13840350	77480	2.22263	1.43465
Bolivia	2085	SSP5	1240000000000	13491791	91789.1	2.63311	1.6026
Bolivia	2090	SSP5	1410000000000	13104484	107852	3.09391	1.79114
Bolivia	2095	SSP5	1600000000000	12689347	125779	3.60816	2.00156
Bolivia	2100	SSP5	1790000000000	12251647	145712	4.17997	2.23556
Botswana	2020	SSP1	34492500000	2523551	13668.2	0.392094	0.5383
Botswana	2025	SSP1	46045200000	2728839	16873.5	0.484044	0.576156
Botswana	2030	SSP1	56150700000	2921393	19220.5	0.55137	0.60391
Botswana	2035	SSP1	67717500000	3090690	21910.2	0.628526	0.635674
Botswana	2040	SSP1	80067000000	3235089	24749.6	0.709979	0.669178
Botswana	2045	SSP1	93541000000	3361057	27830.8	0.79837	0.70551
Botswana	2050	SSP1	108000000000	3466776	31183.2	0.894536	0.745012
Botswana	2055	SSP1	124000000000	3536880	34929.4	1.002	0.789116
Botswana	2060	SSP1	140000000000	3574957	39142	1.12285	0.838678
Botswana	2065	SSP1	157000000000	3584515	43747.3	1.25496	0.892832
Botswana	2070	SSP1	174000000000	3567220	48665.9	1.39606	0.950648
Botswana	2075	SSP1	190000000000	3526396	53908	1.54643	1.01225
Botswana	2080	SSP1	206000000000	3463087	59563.3	1.70867	1.07869
Botswana	2085	SSP1	222000000000	3381819	65658.2	1.8835	1.15028
Botswana	2090	SSP1	237000000000	3282768	72273.8	2.07328	1.22798
Botswana	2095	SSP1	252000000000	3168115	79393	2.27751	1.31159
Botswana	2100	SSP1	264000000000	3037785	87057.5	2.49738	1.40159
Botswana	2020	SSP2	34492500000	2523551	13668.2	0.392094	0.5383
Botswana	2025	SSP2	46045200000	2733341	16845.8	0.483246	0.575833
Botswana	2030	SSP2	56131600000	2932169	19143.4	0.549157	0.603012
Botswana	2035	SSP2	67251700000	3114883	21590.4	0.619355	0.631935
Botswana	2040	SSP2	78254500000	3276831	23881.2	0.685067	0.659002
Botswana	2045	SSP2	89459700000	3415211	26194.5	0.751429	0.686316
Botswana	2050	SSP2	101000000000	3520959	28750.4	0.824749	0.716455
Botswana	2055	SSP2	114000000000	3592893	31677.3	0.908711	0.750926
Botswana	2060	SSP2	127000000000	3638584	34954.8	1.00273	0.7895
Botswana	2065	SSP2	141000000000	3661269	38512.6	1.10479	0.831349
Botswana	2070	SSP2	155000000000	3663498	42308.5	1.21368	0.875981
Botswana	2075	SSP2	169000000000	3648250	46397.9	1.33099	0.924049
Botswana	2080	SSP2	184000000000	3613580	50897.7	1.46008	0.976927
Botswana	2085	SSP2	199000000000	3563921	55821.4	1.60132	1.03477
Botswana	2090	SSP2	214000000000	3497433	61248.6	1.75701	1.09853
Botswana	2095	SSP2	229000000000	3419253	67108.2	1.9251	1.16736
Botswana	2100	SSP2	245000000000	3331365	73444.1	2.10686	1.24178
Botswana	2020	SSP3	34492500000	2523551	13668.2	0.392094	0.5383
Botswana	2025	SSP3	46045200000	2727254	16883.4	0.484325	0.57627
Botswana	2030	SSP3	56082500000	2915192	19238	0.551872	0.604111
Botswana	2035	SSP3	66286600000	3096723	21405.4	0.614047	0.629744
Botswana	2040	SSP3	75179100000	3270264	22988.7	0.659466	0.648504
Botswana	2045	SSP3	82925100000	3423799	24220.2	0.694794	0.663111
Botswana	2050	SSP3	90063800000	3549739	25371.9	0.727833	0.676757
Botswana	2055	SSP3	96894800000	3649957	26546.8	0.761537	0.690653
Botswana	2060	SSP3	103000000000	3735542	27642.6	0.79297	0.703607
Botswana	2065	SSP3	109000000000	3808386	28602.7	0.820511	0.714956
Botswana	2070	SSP3	114000000000	3869081	29426.4	0.84414	0.724691
Botswana	2075	SSP3	118000000000	3918484	30191.3	0.866083	0.733725
Botswana	2080	SSP3	122000000000	3953901	30964.6	0.888267	0.742847
Botswana	2085	SSP3	126000000000	3980190	31724.6	0.910069	0.751805
Botswana	2090	SSP3	130000000000	3996228	32482.1	0.9318	0.760724
Botswana	2095	SSP3	133000000000	4006843	33180.7	0.95184	0.768947
Botswana	2100	SSP3	136000000000	4011669	33848.8	0.971003	0.776805
Botswana	2020	SSP4	34492500000	2523551	13668.2	0.392094	0.5383
Botswana	2025	SSP4	46045200000	2735991	16829.4	0.482778	0.575644
Botswana	2030	SSP4	56114200000	2936247	19110.9	0.548224	0.602633
Botswana	2035	SSP4	67171800000	3130585	21456.6	0.615516	0.630375
Botswana	2040	SSP4	78543700000	3314955	23693.7	0.679691	0.65683
Botswana	2045	SSP4	90681300000	3476486	26084.2	0.748265	0.68507
Botswana	2050	SSP4	104000000000	3607810	28775.6	0.825473	0.716823
Botswana	2055	SSP4	118000000000	3712747	31827.9	0.913032	0.752797
Botswana	2060	SSP4	134000000000	3802870	35126.1	1.00765	0.79165
Botswana	2065	SSP4	150000000000	3878036	38610	1.10759	0.832674
Botswana	2070	SSP4	167000000000	3937836	42287.2	1.21307	0.875958
Botswana	2075	SSP4	184000000000	3983166	46268.5	1.32728	0.922805
Botswana	2080	SSP4	203000000000	4011014	50666.2	1.45344	0.974535
Botswana	2085	SSP4	223000000000	4027006	55453.4	1.59076	1.03083
Botswana	2090	SSP4	244000000000	4029227	60679.9	1.7407	1.09228
Botswana	2095	SSP4	267000000000	4022710	66256.3	1.90066	1.15784
Botswana	2100	SSP4	290000000000	4006686	72263.7	2.073	1.22846
Botswana	2020	SSP5	34492500000	2523551	13668.2	0.392094	0.5383
Botswana	2025	SSP5	46045200000	2740358	16802.6	0.482009	0.575332
Botswana	2030	SSP5	56207000000	2945025	19085.4	0.547494	0.602341
Botswana	2035	SSP5	68828300000	3126510	22014.4	0.631517	0.63693
Botswana	2040	SSP5	84231600000	3282741	25658.9	0.736065	0.679909
Botswana	2045	SSP5	103000000000	3420141	30049.9	0.862028	0.73165
Botswana	2050	SSP5	124000000000	3536946	34978.2	1.0034	0.789691
Botswana	2055	SSP5	147000000000	3617679	40607	1.16487	0.855937
Botswana	2060	SSP5	173000000000	3666030	47108.7	1.35139	0.932421
Botswana	2065	SSP5	201000000000	3684261	54488.5	1.56309	1.0192
Botswana	2070	SSP5	230000000000	3673980	62722.4	1.79929	1.116
Botswana	2075	SSP5	262000000000	3638446	71893.1	2.06236	1.2238
Botswana	2080	SSP5	294000000000	3578586	82193.9	2.35786	1.34486
Botswana	2085	SSP5	328000000000	3498932	93750.9	2.68939	1.48067
Botswana	2090	SSP5	363000000000	3399610	106783	3.06325	1.63382
Botswana	2095	SSP5	398000000000	3282937	121385	3.48211	1.8054
Botswana	2100	SSP5	434000000000	3148954	137745	3.95142	1.99764
Brunei Darussalam	2020	SSP1	27211000000	439894	61858.1	1.77449	0.7389
Brunei Darussalam	2025	SSP1	27823900000	459870	60503.8	1.73565	0.722994
Brunei Darussalam	2030	SSP1	32450000000	476124	68154.5	1.95512	0.81296
Brunei Darussalam	2035	SSP1	36747800000	489095	75134.3	2.15534	0.895034
Brunei Darussalam	2040	SSP1	39740200000	499102	79623.4	2.28412	0.947823
Brunei Darussalam	2045	SSP1	41669300000	507195	82156.4	2.35678	0.977611
Brunei Darussalam	2050	SSP1	42921200000	512843	83692.7	2.40085	0.995679
Brunei Darussalam	2055	SSP1	43838300000	515308	85072	2.44042	1.0119
Brunei Darussalam	2060	SSP1	44676800000	514728	86796.9	2.4899	1.03218
Brunei Darussalam	2065	SSP1	45551300000	511331	89083.8	2.5555	1.05906
Brunei Darussalam	2070	SSP1	46151600000	505820	91241.2	2.61739	1.08442
Brunei Darussalam	2075	SSP1	46609400000	498687	93464.2	2.68116	1.11056
Brunei Darussalam	2080	SSP1	46884700000	490053	95672.7	2.74452	1.13651
Brunei Darussalam	2085	SSP1	47009400000	479777	97981.8	2.81076	1.16365
Brunei Darussalam	2090	SSP1	47015700000	467584	100550	2.88444	1.19384
Brunei Darussalam	2095	SSP1	46787800000	451952	103524	2.96974	1.22879
Brunei Darussalam	2100	SSP1	46255100000	432505	106947	3.06794	1.26902
Brunei Darussalam	2020	SSP2	27211000000	439894	61858.1	1.77449	0.7389
Brunei Darussalam	2025	SSP2	27823900000	461322	60313.4	1.73018	0.720756
Brunei Darussalam	2030	SSP2	32417900000	480202	67508.9	1.9366	0.805372
Brunei Darussalam	2035	SSP2	36462800000	496611	73423.3	2.10626	0.874924
Brunei Darussalam	2040	SSP2	39283200000	510817	76902.7	2.20607	0.915844
Brunei Darussalam	2045	SSP2	41270200000	522830	78936.2	2.2644	0.939763
Brunei Darussalam	2050	SSP2	42760600000	532415	80314.4	2.30394	0.955975
Brunei Darussalam	2055	SSP2	44005000000	539336	81591.1	2.34056	0.970991
Brunei Darussalam	2060	SSP2	45165700000	543887	83042.4	2.3822	0.988059
Brunei Darussalam	2065	SSP2	46321300000	545825	84864.7	2.43448	1.00949
Brunei Darussalam	2070	SSP2	47225500000	545846	86518	2.4819	1.02892
Brunei Darussalam	2075	SSP2	48061300000	544557	88257.6	2.5318	1.04938
Brunei Darussalam	2080	SSP2	48849300000	542353	90069.2	2.58377	1.07067
Brunei Darussalam	2085	SSP2	49674800000	539468	92081.1	2.64149	1.09433
Brunei Darussalam	2090	SSP2	50618300000	536120	94416	2.70847	1.12178
Brunei Darussalam	2095	SSP2	51700100000	532319	97122.4	2.7861	1.15359
Brunei Darussalam	2100	SSP2	52897200000	527779	100226	2.87514	1.19008
Brunei Darussalam	2020	SSP3	27211000000	439894	61858.1	1.77449	0.7389
Brunei Darussalam	2025	SSP3	27823900000	461899	60238.1	1.72802	0.719871
Brunei Darussalam	2030	SSP3	32364900000	482415	67089.3	1.92456	0.800441
Brunei Darussalam	2035	SSP3	35895900000	501351	71598.3	2.05391	0.853471
Brunei Darussalam	2040	SSP3	38022600000	518881	73278.1	2.10209	0.873235
Brunei Darussalam	2045	SSP3	39376200000	533978	73741.2	2.11538	0.878693
Brunei Darussalam	2050	SSP3	40224000000	546807	73561.6	2.11023	0.876592
Brunei Darussalam	2055	SSP3	40716300000	557675	73010.8	2.09443	0.870125
Brunei Darussalam	2060	SSP3	40930700000	567616	72109.8	2.06858	0.85954
Brunei Darussalam	2065	SSP3	40933200000	576638	70986	2.03634	0.846334
Brunei Darussalam	2070	SSP3	40578300000	585531	69301.7	1.98803	0.826539
Brunei Darussalam	2075	SSP3	40085100000	594620	67413	1.93384	0.804339
Brunei Darussalam	2080	SSP3	39512800000	604068	65411.2	1.87642	0.780811
Brunei Darussalam	2085	SSP3	38956100000	614140	63432	1.81964	0.757549
Brunei Darussalam	2090	SSP3	38473400000	625020	61555.5	1.76581	0.735496
Brunei Darussalam	2095	SSP3	38081300000	636725	59808.1	1.71569	0.714961
Brunei Darussalam	2100	SSP3	37786500000	649141	58210	1.66984	0.696182
Brunei Darussalam	2020	SSP4	27211000000	439894	61858.1	1.77449	0.7389
Brunei Darussalam	2025	SSP4	27823900000	462757	60126.4	1.72482	0.718559
Brunei Darussalam	2030	SSP4	32444300000	484290	66993.5	1.92181	0.799316
Brunei Darussalam	2035	SSP4	36678900000	504336	72727.1	2.08629	0.866745
Brunei Darussalam	2040	SSP4	39706800000	523034	75916.3	2.17777	0.904257
Brunei Darussalam	2045	SSP4	41848100000	539287	77598.9	2.22604	0.924054
Brunei Darussalam	2050	SSP4	43521000000	553347	78650.5	2.25621	0.936429
Brunei Darussalam	2055	SSP4	45073700000	565485	79708	2.28655	0.948873
Brunei Darussalam	2060	SSP4	46666800000	576748	80913.7	2.32113	0.963058
Brunei Darussalam	2065	SSP4	48387000000	586861	82450.5	2.36522	0.981136
Brunei Darussalam	2070	SSP4	50046400000	596501	83899.9	2.4068	0.998185
Brunei Darussalam	2075	SSP4	51848900000	605874	85577	2.45491	1.01791
Brunei Darussalam	2080	SSP4	53820100000	615057	87504.2	2.51019	1.04058
Brunei Darussalam	2085	SSP4	56040800000	624278	89769	2.57516	1.06721
Brunei Darussalam	2090	SSP4	58570700000	633680	92429.5	2.65148	1.0985
Brunei Darussalam	2095	SSP4	61430700000	643269	95497.7	2.7395	1.13458
Brunei Darussalam	2100	SSP4	64639300000	653021	98985	2.83954	1.17559
Brunei Darussalam	2020	SSP5	27211000000	439894	61858.1	1.77449	0.7389
Brunei Darussalam	2025	SSP5	27823900000	461239	60324.3	1.73049	0.720884
Brunei Darussalam	2030	SSP5	32507000000	478885	67880.6	1.94726	0.809742
Brunei Darussalam	2035	SSP5	37438600000	493343	75887.6	2.17695	0.903895
Brunei Darussalam	2040	SSP5	41567700000	505013	82310.2	2.36119	0.979417
Brunei Darussalam	2045	SSP5	44910400000	514921	87218	2.50198	1.03713
Brunei Darussalam	2050	SSP5	47736300000	522524	91357.1	2.62072	1.0858
Brunei Darussalam	2055	SSP5	50432500000	527125	95674.7	2.74457	1.13657
Brunei Darussalam	2060	SSP5	53285000000	528865	100754	2.89027	1.19628
Brunei Darussalam	2065	SSP5	56409400000	527804	106876	3.06589	1.26826
Brunei Darussalam	2070	SSP5	59435000000	524596	113297	3.25009	1.34376
Brunei Darussalam	2075	SSP5	62481500000	519701	120226	3.44886	1.42522
Brunei Darussalam	2080	SSP5	65476900000	513225	127579	3.65981	1.51167
Brunei Darussalam	2085	SSP5	68441300000	504936	135545	3.8883	1.60532
Brunei Darussalam	2090	SSP5	71398900000	494533	144376	4.14166	1.70915
Brunei Darussalam	2095	SSP5	74155900000	480510	154327	4.42712	1.82613
Brunei Darussalam	2100	SSP5	76536400000	462298	165556	4.74924	1.95814
Burkina Faso	2020	SSP1	45297900000	21231890	2133.48	0.0612023	0.3558
Burkina Faso	2025	SSP1	57857800000	23825142	2428.43	0.0696634	0.361419
Burkina Faso	2030	SSP1	77131500000	26271118	2935.98	0.0842231	0.369416
Burkina Faso	2035	SSP1	108000000000	28662135	3762.73	0.10794	0.38112
Burkina Faso	2040	SSP1	148000000000	30958081	4770.71	0.136855	0.394876
Burkina Faso	2045	SSP1	201000000000	33185760	6045.97	0.173438	0.411717
Burkina Faso	2050	SSP1	268000000000	35209003	7606.49	0.218204	0.431743
Burkina Faso	2055	SSP1	351000000000	36893530	9520.72	0.273116	0.455647
Burkina Faso	2060	SSP1	454000000000	38240397	11878.5	0.340753	0.484486
Burkina Faso	2065	SSP1	579000000000	39340674	14715.7	0.422141	0.518756
Burkina Faso	2070	SSP1	724000000000	40216309	17997.2	0.516278	0.558065
Burkina Faso	2075	SSP1	889000000000	40865219	21761.4	0.62426	0.602861
Burkina Faso	2080	SSP1	1070000000000	41245665	26022.9	0.746505	0.65328
Burkina Faso	2085	SSP1	1270000000000	41323049	30838	0.884635	0.709958
Burkina Faso	2090	SSP1	1490000000000	41106448	36296.7	1.04123	0.773959
Burkina Faso	2095	SSP1	1730000000000	40649777	42449.2	1.21772	0.845917
Burkina Faso	2100	SSP1	1970000000000	40008612	49302.6	1.41432	0.925964
Burkina Faso	2020	SSP2	45297900000	21231890	2133.48	0.0612023	0.3558
Burkina Faso	2025	SSP2	57857800000	24190355	2391.77	0.0686116	0.361291
Burkina Faso	2030	SSP2	77140800000	27353587	2820.13	0.0808999	0.368952
Burkina Faso	2035	SSP2	107000000000	30679949	3484.65	0.0999626	0.379524
Burkina Faso	2040	SSP2	144000000000	34126978	4214.99	0.120914	0.390971
Burkina Faso	2045	SSP2	191000000000	37596482	5080.13	0.145731	0.404021
Burkina Faso	2050	SSP2	251000000000	40991427	6125.7	0.175725	0.41913
Burkina Faso	2055	SSP2	327000000000	44182561	7407.81	0.212504	0.436852
Burkina Faso	2060	SSP2	423000000000	47167852	8957.99	0.256974	0.457554
Burkina Faso	2065	SSP2	540000000000	49968755	10802.8	0.309894	0.481568
Burkina Faso	2070	SSP2	680000000000	52568110	12926.1	0.370806	0.508689
Burkina Faso	2075	SSP2	845000000000	54936993	15372.4	0.440982	0.539417
Burkina Faso	2080	SSP2	1040000000000	56997398	18171.2	0.521268	0.574032
Burkina Faso	2085	SSP2	1250000000000	58685700	21379.1	0.613293	0.61315
Burkina Faso	2090	SSP2	1500000000000	60014636	25053.7	0.718704	0.657456
Burkina Faso	2095	SSP2	1780000000000	61079608	29212	0.837992	0.70723
Burkina Faso	2100	SSP2	2100000000000	61969979	33836.1	0.970639	0.762335
Burkina Faso	2020	SSP3	45297900000	21231890	2133.48	0.0612023	0.3558
Burkina Faso	2025	SSP3	57857800000	24384180	2372.76	0.0680662	0.361228
Burkina Faso	2030	SSP3	77079600000	27988530	2753.97	0.0790019	0.3687
Burkina Faso	2035	SSP3	105000000000	32034230	3287.11	0.0942957	0.378325
Burkina Faso	2040	SSP3	137000000000	36513874	3757.8	0.107798	0.387575
Burkina Faso	2045	SSP3	173000000000	41192166	4208.23	0.120719	0.396752
Burkina Faso	2050	SSP3	215000000000	46022514	4669.35	0.133947	0.406181
Burkina Faso	2055	SSP3	263000000000	50888397	5167.9	0.148249	0.416079
Burkina Faso	2060	SSP3	317000000000	55820679	5681.14	0.162972	0.426205
Burkina Faso	2065	SSP3	377000000000	60744493	6209.68	0.178134	0.436504
Burkina Faso	2070	SSP3	441000000000	65596836	6728.63	0.193021	0.446631
Burkina Faso	2075	SSP3	510000000000	70292276	7253.13	0.208067	0.456693
Burkina Faso	2080	SSP3	581000000000	74693422	7784.21	0.223302	0.466588
Burkina Faso	2085	SSP3	656000000000	78684214	8333.62	0.239063	0.476358
Burkina Faso	2090	SSP3	732000000000	82266786	8903.02	0.255397	0.486025
Burkina Faso	2095	SSP3	811000000000	85616463	9473.17	0.271752	0.495507
Burkina Faso	2100	SSP3	890000000000	88851936	10021	0.287468	0.504632
Burkina Faso	2020	SSP4	45297900000	21231890	2133.48	0.0612023	0.3558
Burkina Faso	2025	SSP4	57857800000	24364053	2374.72	0.0681225	0.361235
Burkina Faso	2030	SSP4	77096000000	27948314	2758.52	0.0791324	0.368721
Burkina Faso	2035	SSP4	106000000000	31966482	3308.22	0.0949012	0.378517
Burkina Faso	2040	SSP4	139000000000	36402790	3807.48	0.109223	0.388067
Burkina Faso	2045	SSP4	176000000000	41013448	4286.57	0.122967	0.397525
Burkina Faso	2050	SSP4	219000000000	45747792	4783.51	0.137222	0.407295
Burkina Faso	2055	SSP4	269000000000	50486397	5331.06	0.15293	0.417664
Burkina Faso	2060	SSP4	326000000000	55259589	5907.54	0.169467	0.428401
Burkina Faso	2065	SSP4	391000000000	60010446	6515.4	0.186904	0.43949
Burkina Faso	2070	SSP4	461000000000	64680848	7130.8	0.204558	0.450599
Burkina Faso	2075	SSP4	538000000000	69190886	7772.14	0.222956	0.461881
Burkina Faso	2080	SSP4	620000000000	73411390	8443.01	0.242201	0.47327
Burkina Faso	2085	SSP4	707000000000	77234968	9159.06	0.262742	0.484861
Burkina Faso	2090	SSP4	801000000000	80671467	9925.63	0.284732	0.496725
Burkina Faso	2095	SSP4	900000000000	83903314	10724.7	0.307655	0.508801
Burkina Faso	2100	SSP4	1000000000000	87051648	11533.5	0.330856	0.520922
Burkina Faso	2020	SSP5	45297900000	21231890	2133.48	0.0612023	0.3558
Burkina Faso	2025	SSP5	57857800000	23757810	2435.32	0.0698608	0.361444
Burkina Faso	2030	SSP5	77134500000	26100457	2955.29	0.0847771	0.369501
Burkina Faso	2035	SSP5	110000000000	28352547	3862.37	0.110798	0.382034
Burkina Faso	2040	SSP5	156000000000	30478297	5116.85	0.146785	0.398547
Burkina Faso	2045	SSP5	222000000000	32508227	6837.96	0.196157	0.420467
Burkina Faso	2050	SSP5	309000000000	34311712	9008.88	0.258433	0.447487
Burkina Faso	2055	SSP5	420000000000	35760773	11740.4	0.336792	0.480806
Burkina Faso	2060	SSP5	560000000000	36860514	15203.8	0.436144	0.522438
Burkina Faso	2065	SSP5	736000000000	37726804	19513.7	0.559781	0.57383
Burkina Faso	2070	SSP5	948000000000	38389124	24690.2	0.708275	0.635241
Burkina Faso	2075	SSP5	1200000000000	38854046	30855.5	0.885136	0.708115
Burkina Faso	2080	SSP5	1490000000000	39089249	38105.4	1.09311	0.79355
Burkina Faso	2085	SSP5	1820000000000	39067440	46609.7	1.33707	0.89352
Burkina Faso	2090	SSP5	2200000000000	38800622	56609.7	1.62393	1.01087
Burkina Faso	2095	SSP5	2620000000000	38341178	68305.2	1.95944	1.148
Burkina Faso	2100	SSP5	3090000000000	37741518	81843.3	2.3478	1.30668
Burundi	2020	SSP1	8695670000	12053895	721.399	0.0206944	0.3227
Burundi	2025	SSP1	10591100000	13526911	782.965	0.0224606	0.324646
Burundi	2030	SSP1	13997400000	14893910	939.807	0.0269598	0.327624
Burundi	2035	SSP1	18807800000	16212526	1160.08	0.0332786	0.331308
Burundi	2040	SSP1	25631600000	17456809	1468.29	0.04212	0.335964
Burundi	2045	SSP1	35401300000	18636942	1899.52	0.0544907	0.342013
Burundi	2050	SSP1	48604200000	19687779	2468.75	0.0708199	0.349577
Burundi	2055	SSP1	65975400000	20546378	3211.05	0.0921138	0.359017
Burundi	2060	SSP1	88609900000	21195318	4180.64	0.119928	0.370955
Burundi	2065	SSP1	117000000000	21685688	5413.2	0.155286	0.385854
Burundi	2070	SSP1	153000000000	22028181	6928.31	0.198749	0.403952
Burundi	2075	SSP1	195000000000	22234970	8766.15	0.25147	0.425731
Burundi	2080	SSP1	244000000000	22293262	10963.4	0.314503	0.451614
Burundi	2085	SSP1	301000000000	22193378	13557.8	0.388927	0.482035
Burundi	2090	SSP1	364000000000	21948248	16595.6	0.476071	0.517548
Burundi	2095	SSP1	434000000000	21561076	20136.1	0.577635	0.558853
Burundi	2100	SSP1	510000000000	21043241	24242.5	0.695432	0.606704
Burundi	2020	SSP2	8695670000	12053895	721.399	0.0206944	0.3227
Burundi	2025	SSP2	10591100000	13674715	774.502	0.0222178	0.324669
Burundi	2030	SSP2	13994800000	15345504	911.98	0.0261616	0.327671
Burundi	2035	SSP2	18577500000	17092855	1086.86	0.0311782	0.331177
Burundi	2040	SSP2	24524900000	18884931	1298.65	0.0372537	0.335154
Burundi	2045	SSP2	32352400000	20644617	1567.11	0.044955	0.33977
Burundi	2050	SSP2	42678600000	22312141	1912.8	0.0548715	0.345218
Burundi	2055	SSP2	56270100000	23830484	2361.27	0.0677365	0.35175
Burundi	2060	SSP2	73984400000	25184778	2937.66	0.0842714	0.359651
Burundi	2065	SSP2	96618900000	26400351	3659.76	0.104986	0.369149
Burundi	2070	SSP2	125000000000	27462038	4539.72	0.130229	0.380376
Burundi	2075	SSP2	159000000000	28367764	5606.4	0.160828	0.393668
Burundi	2080	SSP2	200000000000	29082452	6891.23	0.197686	0.409368
Burundi	2085	SSP2	249000000000	29589760	8427	0.241741	0.427845
Burundi	2090	SSP2	307000000000	29935215	10240.1	0.293754	0.44945
Burundi	2095	SSP2	373000000000	30146453	12360.2	0.35457	0.474551
Burundi	2100	SSP2	448000000000	30243984	14819.2	0.425113	0.503544
Burundi	2020	SSP3	8695670000	12053895	721.399	0.0206944	0.3227
Burundi	2025	SSP3	10591100000	13795209	767.738	0.0220237	0.324689
Burundi	2030	SSP3	13989500000	15694967	891.337	0.0255694	0.327719
Burundi	2035	SSP3	18298100000	17810867	1027.36	0.0294713	0.331073
Burundi	2040	SSP3	23201500000	20123422	1152.96	0.0330744	0.334468
Burundi	2045	SSP3	28514000000	22467171	1269.14	0.0364072	0.337779
Burundi	2050	SSP3	34422500000	24795742	1388.24	0.0398239	0.341111
Burundi	2055	SSP3	41078400000	27065195	1517.76	0.0435392	0.344516
Burundi	2060	SSP3	48392800000	29280330	1652.74	0.0474114	0.347941
Burundi	2065	SSP3	56193900000	31427111	1788.07	0.0512935	0.351313
Burundi	2070	SSP3	64180000000	33456010	1918.34	0.0550305	0.354527
Burundi	2075	SSP3	72322200000	35340888	2046.42	0.0587046	0.357597
Burundi	2080	SSP3	80476800000	37006314	2174.68	0.062384	0.360487
Burundi	2085	SSP3	88486700000	38425964	2302.78	0.0660589	0.36317
Burundi	2090	SSP3	96283700000	39693738	2425.66	0.0695839	0.365667
Burundi	2095	SSP3	104000000000	40851245	2540.24	0.0728707	0.367974
Burundi	2100	SSP3	111000000000	41897787	2646.3	0.0759131	0.370089
Burundi	2020	SSP4	8695670000	12053895	721.399	0.0206944	0.3227
Burundi	2025	SSP4	10591100000	13762484	769.563	0.0220761	0.324684
Burundi	2030	SSP4	13988100000	15621895	895.416	0.0256864	0.327706
Burundi	2035	SSP4	18339500000	17686552	1036.92	0.0297456	0.331082
Burundi	2040	SSP4	23331900000	19932567	1170.54	0.0335788	0.334517
Burundi	2045	SSP4	28696400000	22192082	1293.09	0.0370943	0.337832
Burundi	2050	SSP4	34646900000	24418962	1418.85	0.0407019	0.341158
Burundi	2055	SSP4	41360800000	26570189	1556.66	0.0446552	0.344563
Burundi	2060	SSP4	48753800000	28651333	1701.62	0.0488137	0.347994
Burundi	2065	SSP4	56678000000	30660774	1848.55	0.0530285	0.351388
Burundi	2070	SSP4	64848400000	32553288	1992.07	0.0571456	0.354645
Burundi	2075	SSP4	73259300000	34306990	2135.4	0.0612573	0.357786
Burundi	2080	SSP4	81786900000	35852638	2281.2	0.0654396	0.360782
Burundi	2085	SSP4	90293000000	37169686	2429.21	0.0696856	0.363615
Burundi	2090	SSP4	98728800000	38352724	2574.23	0.0738458	0.366301
Burundi	2095	SSP4	107000000000	39443038	2713.13	0.0778302	0.368839
Burundi	2100	SSP4	115000000000	40440211	2845.83	0.081637	0.371226
Burundi	2020	SSP5	8695670000	12053895	721.399	0.0206944	0.3227
Burundi	2025	SSP5	10591100000	13452414	787.301	0.0225849	0.324635
Burundi	2030	SSP5	13990700000	14720319	950.435	0.0272647	0.327605
Burundi	2035	SSP5	19069500000	15915987	1198.13	0.0343703	0.331509
Burundi	2040	SSP5	27150800000	17016559	1595.55	0.0457708	0.337095
Burundi	2045	SSP5	39670600000	18035129	2199.63	0.0630997	0.345042
Burundi	2050	SSP5	57112000000	18911506	3019.96	0.0866322	0.355414
Burundi	2055	SSP5	80606200000	19588722	4114.93	0.118043	0.36885
Burundi	2060	SSP5	112000000000	20053931	5582.35	0.160138	0.386489
Burundi	2065	SSP5	153000000000	20376080	7503.8	0.215258	0.409347
Burundi	2070	SSP5	205000000000	20570069	9943.87	0.285255	0.438197
Burundi	2075	SSP5	269000000000	20651976	13003.2	0.373016	0.474234
Burundi	2080	SSP5	346000000000	20614170	16785.2	0.481509	0.51867
Burundi	2085	SSP5	438000000000	20450840	21405	0.614035	0.572851
Burundi	2090	SSP5	545000000000	20175619	27003.9	0.774649	0.638452
Burundi	2095	SSP5	668000000000	19791688	33758.4	0.968412	0.717549
Burundi	2100	SSP5	808000000000	19308836	41869.4	1.20109	0.812513
Cabo Verde	2020	SSP1	3592910000	579929	6195.43	0.177725	0.5604
Cabo Verde	2025	SSP1	5104280000	605421	8430.96	0.241855	0.586705
Cabo Verde	2030	SSP1	6443440000	626505	10284.7	0.295033	0.608518
Cabo Verde	2035	SSP1	8002240000	641396	12476.3	0.357901	0.634298
Cabo Verde	2040	SSP1	9607460000	651087	14756	0.423299	0.66111
Cabo Verde	2045	SSP1	11232100000	656738	17102.9	0.490622	0.688707
Cabo Verde	2050	SSP1	12776000000	658144	19412.2	0.556868	0.715859
Cabo Verde	2055	SSP1	14271500000	655004	21788.4	0.625034	0.743795
Cabo Verde	2060	SSP1	15766400000	647731	24341	0.698258	0.773801
Cabo Verde	2065	SSP1	17323600000	637661	27167.4	0.779339	0.807024
Cabo Verde	2070	SSP1	18865600000	625002	30184.9	0.865899	0.842491
Cabo Verde	2075	SSP1	20324300000	609863	33326	0.956008	0.87941
Cabo Verde	2080	SSP1	21618700000	592475	36488.8	1.04674	0.916582
Cabo Verde	2085	SSP1	22726400000	572913	39668.2	1.13794	0.953947
Cabo Verde	2090	SSP1	23668900000	551687	42902.8	1.23073	0.99196
Cabo Verde	2095	SSP1	24465400000	529271	46224.7	1.32603	1.031
Cabo Verde	2100	SSP1	25120500000	506273	49618.5	1.42338	1.07088
Cabo Verde	2020	SSP2	3592910000	579929	6195.43	0.177725	0.5604
Cabo Verde	2025	SSP2	5104280000	608098	8393.84	0.24079	0.586271
Cabo Verde	2030	SSP2	6436360000	634167	10149.3	0.291149	0.606932
Cabo Verde	2035	SSP2	7892940000	655398	12043	0.345471	0.629215
Cabo Verde	2040	SSP2	9291570000	672566	13815.1	0.396307	0.650064
Cabo Verde	2045	SSP2	10658600000	685322	15552.7	0.446153	0.670505
Cabo Verde	2050	SSP2	12009000000	693849	17307.8	0.496501	0.691147
Cabo Verde	2055	SSP2	13398000000	698079	19192.7	0.550571	0.713312
Cabo Verde	2060	SSP2	14850300000	698445	21261.9	0.609931	0.737642
Cabo Verde	2065	SSP2	16419100000	695848	23595.8	0.676882	0.76508
Cabo Verde	2070	SSP2	18038700000	690382	26128.6	0.749538	0.794854
Cabo Verde	2075	SSP2	19655500000	681988	28820.9	0.826771	0.826501
Cabo Verde	2080	SSP2	21212100000	671257	31600.6	0.906511	0.859174
Cabo Verde	2085	SSP2	22709500000	658596	34481.7	0.98916	0.893038
Cabo Verde	2090	SSP2	24183300000	645025	37492	1.07552	0.928421
Cabo Verde	2095	SSP2	25685900000	631761	40657.6	1.16633	0.965629
Cabo Verde	2100	SSP2	27244100000	619520	43976.1	1.26152	1.00464
Cabo Verde	2020	SSP3	3592910000	579929	6195.43	0.177725	0.5604
Cabo Verde	2025	SSP3	5104280000	613474	8320.29	0.23868	0.585411
Cabo Verde	2030	SSP3	6428470000	647230	9932.28	0.284923	0.604392
Cabo Verde	2035	SSP3	7761250000	678020	11446.9	0.328373	0.622225
Cabo Verde	2040	SSP3	8879440000	706426	12569.5	0.360576	0.635448
Cabo Verde	2045	SSP3	9810510000	730590	13428.2	0.385209	0.645564
Cabo Verde	2050	SSP3	10627200000	751338	14144.4	0.405753	0.654001
Cabo Verde	2055	SSP3	11403700000	769000	14829.3	0.4254	0.662068
Cabo Verde	2060	SSP3	12149500000	783974	15497.3	0.444564	0.669935
Cabo Verde	2065	SSP3	12901200000	796036	16206.8	0.464917	0.678287
Cabo Verde	2070	SSP3	13613400000	805098	16909	0.48506	0.686551
Cabo Verde	2075	SSP3	14263800000	811228	17583	0.504394	0.69448
Cabo Verde	2080	SSP3	14838500000	815671	18191.8	0.521859	0.701641
Cabo Verde	2085	SSP3	15370700000	819709	18751.4	0.537913	0.708225
Cabo Verde	2090	SSP3	15901500000	824697	19281.6	0.553123	0.714463
Cabo Verde	2095	SSP3	16462200000	831271	19803.7	0.568098	0.720606
Cabo Verde	2100	SSP3	17062400000	839456	20325.5	0.583069	0.726749
Cabo Verde	2020	SSP4	3592910000	579929	6195.43	0.177725	0.5604
Cabo Verde	2025	SSP4	5104280000	610624	8359.12	0.239794	0.585865
Cabo Verde	2030	SSP4	6430400000	641336	10026.6	0.287627	0.605495
Cabo Verde	2035	SSP4	7821720000	668625	11698.2	0.335581	0.625172
Cabo Verde	2040	SSP4	9085750000	693041	13110	0.37608	0.641791
Cabo Verde	2045	SSP4	10241900000	712737	14369.8	0.41222	0.65662
Cabo Verde	2050	SSP4	11361000000	728975	15584.9	0.447077	0.670919
Cabo Verde	2055	SSP4	12522900000	742068	16875.7	0.484105	0.686107
Cabo Verde	2060	SSP4	13740800000	752460	18261.2	0.52385	0.702405
Cabo Verde	2065	SSP4	15074000000	760372	19824.5	0.568696	0.720792
Cabo Verde	2070	SSP4	16479100000	765756	21520	0.617335	0.740732
Cabo Verde	2075	SSP4	17937800000	768803	23332.1	0.669317	0.76204
Cabo Verde	2080	SSP4	19435600000	770835	25213.7	0.723293	0.784164
Cabo Verde	2085	SSP4	21015500000	772924	27189.6	0.779975	0.807397
Cabo Verde	2090	SSP4	22736900000	776326	29287.8	0.840166	0.83207
Cabo Verde	2095	SSP4	24657000000	781474	31551.9	0.905115	0.858694
Cabo Verde	2100	SSP4	26808100000	788367	34004.6	0.975474	0.887537
Cabo Verde	2020	SSP5	3592910000	579929	6195.43	0.177725	0.5604
Cabo Verde	2025	SSP5	5104280000	598919	8522.49	0.244481	0.587776
Cabo Verde	2030	SSP5	6455720000	612758	10535.5	0.302227	0.611455
Cabo Verde	2035	SSP5	8193590000	620219	13210.8	0.378972	0.642916
Cabo Verde	2040	SSP5	10198700000	622667	16379.1	0.469858	0.680169
Cabo Verde	2045	SSP5	12348600000	621393	19872.4	0.570072	0.721241
Cabo Verde	2050	SSP5	14426400000	616358	23405.9	0.671433	0.76278
Cabo Verde	2055	SSP5	16496200000	607408	27158.4	0.779079	0.806892
Cabo Verde	2060	SSP5	18646500000	595044	31336.3	0.898931	0.856004
Cabo Verde	2065	SSP5	20987400000	581106	36116.3	1.03605	0.912193
Cabo Verde	2070	SSP5	23432300000	565733	41419.4	1.18818	0.97453
Cabo Verde	2075	SSP5	25907600000	549002	47190.4	1.35373	1.04237
Cabo Verde	2080	SSP5	28317300000	531070	53321.2	1.5296	1.11444
Cabo Verde	2085	SSP5	30630200000	512003	59824.3	1.71615	1.19088
Cabo Verde	2090	SSP5	32873700000	492242	66783.6	1.91579	1.27269
Cabo Verde	2095	SSP5	35072200000	472209	74272.6	2.13062	1.36072
Cabo Verde	2100	SSP5	37230100000	452313	82310.5	2.3612	1.45521
Cambodia	2020	SSP1	70116000000	16296273	4302.58	0.123426	0.5113
Cambodia	2025	SSP1	90687500000	17198845	5272.88	0.151261	0.523457
Cambodia	2030	SSP1	124000000000	17904690	6900.59	0.197954	0.54318
Cambodia	2035	SSP1	168000000000	18439518	9098.45	0.261003	0.569465
Cambodia	2040	SSP1	225000000000	18795026	11965.5	0.343247	0.603468
Cambodia	2045	SSP1	296000000000	18984544	15610.4	0.447808	0.646481
Cambodia	2050	SSP1	380000000000	19019396	19958.4	0.572538	0.697631
Cambodia	2055	SSP1	472000000000	18923752	24944.9	0.715584	0.75618
Cambodia	2060	SSP1	579000000000	18722221	30914.6	0.886833	0.826201
Cambodia	2065	SSP1	698000000000	18441109	37837.4	1.08542	0.907362
Cambodia	2070	SSP1	820000000000	18069324	45395.6	1.30224	0.995918
Cambodia	2075	SSP1	941000000000	17597309	53471.5	1.53391	1.09048
Cambodia	2080	SSP1	1060000000000	17036048	62000.3	1.77857	1.19029
Cambodia	2085	SSP1	1170000000000	16418300	70985.4	2.03633	1.29542
Cambodia	2090	SSP1	1270000000000	15769733	80403.4	2.30649	1.40561
Cambodia	2095	SSP1	1360000000000	15087772	90268.5	2.58949	1.52103
Cambodia	2100	SSP1	1440000000000	14358086	100599	2.88584	1.64189
Cambodia	2020	SSP2	70116000000	16296273	4302.58	0.123426	0.5113
Cambodia	2025	SSP2	90687500000	17300449	5241.92	0.150372	0.523177
Cambodia	2030	SSP2	123000000000	18197945	6780.55	0.19451	0.542012
Cambodia	2035	SSP2	165000000000	18977511	8679.01	0.248971	0.56498
Cambodia	2040	SSP2	214000000000	19616709	10918.4	0.313212	0.59184
Cambodia	2045	SSP2	274000000000	20075759	13633.5	0.391098	0.624143
Cambodia	2050	SSP2	345000000000	20392743	16911.1	0.48512	0.662941
Cambodia	2055	SSP2	428000000000	20602701	20750.8	0.595269	0.708261
Cambodia	2060	SSP2	526000000000	20720372	25390.3	0.728359	0.762907
Cambodia	2065	SSP2	639000000000	20742696	30821.5	0.884163	0.826783
Cambodia	2070	SSP2	761000000000	20651101	36863.2	1.05748	0.897741
Cambodia	2075	SSP2	889000000000	20447703	43484.9	1.24743	0.975426
Cambodia	2080	SSP2	1020000000000	20158903	50656	1.45315	1.0595
Cambodia	2085	SSP2	1160000000000	19817535	58382.1	1.67478	1.15006
Cambodia	2090	SSP2	1300000000000	19436076	66674	1.91264	1.24723
Cambodia	2095	SSP2	1440000000000	19002906	75580.5	2.16814	1.35159
Cambodia	2100	SSP2	1580000000000	18518886	85127.7	2.44202	1.46344
Cambodia	2020	SSP3	70116000000	16296273	4302.58	0.123426	0.5113
Cambodia	2025	SSP3	90687500000	17388041	5215.51	0.149615	0.522939
Cambodia	2030	SSP3	123000000000	18438267	6679.91	0.191623	0.541028
Cambodia	2035	SSP3	161000000000	19433501	8260.43	0.236963	0.560437
Cambodia	2040	SSP3	199000000000	20347218	9776.52	0.280454	0.57902
Cambodia	2045	SSP3	238000000000	21089944	11269.8	0.323292	0.597193
Cambodia	2050	SSP3	279000000000	21735451	12835.8	0.368215	0.616141
Cambodia	2055	SSP3	323000000000	22343862	14458.1	0.414752	0.635719
Cambodia	2060	SSP3	372000000000	22926748	16217.4	0.465221	0.656888
Cambodia	2065	SSP3	424000000000	23438360	18069.8	0.518359	0.679091
Cambodia	2070	SSP3	475000000000	23849809	19924.5	0.571564	0.701239
Cambodia	2075	SSP3	527000000000	24179529	21783.5	0.624893	0.72337
Cambodia	2080	SSP3	578000000000	24470943	23628.3	0.677814	0.745302
Cambodia	2085	SSP3	630000000000	24749119	25458.3	0.730311	0.767049
Cambodia	2090	SSP3	683000000000	25007174	27292.7	0.782933	0.78883
Cambodia	2095	SSP3	736000000000	25236906	29166.2	0.836676	0.811048
Cambodia	2100	SSP3	792000000000	25453743	31096.2	0.892041	0.83392
Cambodia	2020	SSP4	70116000000	16296273	4302.58	0.123426	0.5113
Cambodia	2025	SSP4	90687500000	17364403	5222.61	0.149819	0.523003
Cambodia	2030	SSP4	123000000000	18385417	6702.49	0.192271	0.54125
Cambodia	2035	SSP4	162000000000	19346388	8393.19	0.240772	0.561925
Cambodia	2040	SSP4	206000000000	20219413	10187.5	0.292244	0.583746
Cambodia	2045	SSP4	254000000000	20913426	12165.2	0.348979	0.607575
Cambodia	2050	SSP4	311000000000	21505328	14441.7	0.414283	0.634831
Cambodia	2055	SSP4	375000000000	22053953	17024.6	0.488376	0.665654
Cambodia	2060	SSP4	452000000000	22571206	20043.2	0.57497	0.701574
Cambodia	2065	SSP4	541000000000	23016291	23487.4	0.673772	0.742439
Cambodia	2070	SSP4	637000000000	23362049	27270.6	0.782298	0.787205
Cambodia	2075	SSP4	742000000000	23627605	31414.8	0.901182	0.836152
Cambodia	2080	SSP4	857000000000	23855939	35910.9	1.03016	0.889204
Cambodia	2085	SSP4	982000000000	24071902	40773.9	1.16966	0.946559
Cambodia	2090	SSP4	1120000000000	24268801	46051.3	1.32105	1.00877
Cambodia	2095	SSP4	1270000000000	24437685	51825.7	1.4867	1.0768
Cambodia	2100	SSP4	1430000000000	24592792	58158.9	1.66838	1.15139
Cambodia	2020	SSP5	70116000000	16296273	4302.58	0.123426	0.5113
Cambodia	2025	SSP5	90687500000	17151524	5287.43	0.151678	0.523589
Cambodia	2030	SSP5	124000000000	17801687	6955.8	0.199538	0.543744
Cambodia	2035	SSP5	173000000000	18276506	9453.45	0.271187	0.573504
Cambodia	2040	SSP5	243000000000	18571444	13085.1	0.375366	0.616447
Cambodia	2045	SSP5	336000000000	18701442	17971.9	0.515551	0.674011
Cambodia	2050	SSP5	447000000000	18678524	23908.6	0.685856	0.743793
Cambodia	2055	SSP5	573000000000	18527348	30900.8	0.886437	0.825877
Cambodia	2060	SSP5	722000000000	18273304	39509.2	1.13338	0.926879
Cambodia	2065	SSP5	895000000000	17948826	49849.6	1.43001	1.04819
Cambodia	2070	SSP5	1080000000000	17543484	61626.9	1.76786	1.18632
Cambodia	2075	SSP5	1270000000000	17048082	74783.8	2.14529	1.3406
Cambodia	2080	SSP5	1470000000000	16473548	89325	2.56242	1.51109
Cambodia	2085	SSP5	1670000000000	15852141	105365	3.02255	1.69916
Cambodia	2090	SSP5	1870000000000	15209223	122982	3.52793	1.90576
Cambodia	2095	SSP5	2070000000000	14542394	142316	4.08256	2.13253
Cambodia	2100	SSP5	2260000000000	13837315	163524	4.69093	2.38129
Cameroon	2020	SSP1	97386500000	26137122	3725.98	0.106886	0.4325
Cameroon	2025	SSP1	119000000000	29417339	4028.3	0.115558	0.438776
Cameroon	2030	SSP1	150000000000	32591680	4606.94	0.132157	0.448212
Cameroon	2035	SSP1	198000000000	35610011	5546.33	0.159105	0.461761
Cameroon	2040	SSP1	260000000000	38424018	6776.46	0.194393	0.478559
Cameroon	2045	SSP1	343000000000	41138071	8346.28	0.239426	0.499267
Cameroon	2050	SSP1	448000000000	43718432	10240.1	0.293752	0.523674
Cameroon	2055	SSP1	575000000000	45989237	12497.6	0.358514	0.552101
Cameroon	2060	SSP1	728000000000	47856997	15213.5	0.436423	0.585582
Cameroon	2065	SSP1	910000000000	49374837	18430.5	0.528707	0.624664
Cameroon	2070	SSP1	1120000000000	50558334	22133.6	0.634937	0.669185
Cameroon	2075	SSP1	1350000000000	51337934	26369.8	0.756457	0.719638
Cameroon	2080	SSP1	1610000000000	51773816	31134.7	0.893145	0.776022
Cameroon	2085	SSP1	1890000000000	51857365	36483.7	1.04659	0.838983
Cameroon	2090	SSP1	2190000000000	51628365	42450.5	1.21776	0.908947
Cameroon	2095	SSP1	2510000000000	51112597	49070.1	1.40765	0.986348
Cameroon	2100	SSP1	2840000000000	50317326	56389.9	1.61763	1.07175
Cameroon	2020	SSP2	97386500000	26137122	3725.98	0.106886	0.4325
Cameroon	2025	SSP2	119000000000	29624645	4000.12	0.114749	0.438616
Cameroon	2030	SSP2	150000000000	33201023	4520.43	0.129676	0.447701
Cameroon	2035	SSP2	196000000000	36782301	5316.82	0.152521	0.460035
Cameroon	2040	SSP2	252000000000	40324687	6257.46	0.179505	0.474033
Cameroon	2045	SSP2	323000000000	43795730	7384.21	0.211827	0.49016
Cameroon	2050	SSP2	412000000000	47105848	8736.88	0.250631	0.50881
Cameroon	2055	SSP2	520000000000	50198557	10359.6	0.297182	0.530455
Cameroon	2060	SSP2	652000000000	52968345	12312.9	0.353214	0.555718
Cameroon	2065	SSP2	811000000000	55413945	14634.9	0.419824	0.585048
Cameroon	2070	SSP2	997000000000	57536364	17335.1	0.497284	0.618556
Cameroon	2075	SSP2	1210000000000	59190071	20489.4	0.58777	0.657014
Cameroon	2080	SSP2	1460000000000	60455876	24113.6	0.691736	0.700676
Cameroon	2085	SSP2	1730000000000	61305912	28280.6	0.811273	0.750374
Cameroon	2090	SSP2	2040000000000	61814446	33001.8	0.946708	0.806305
Cameroon	2095	SSP2	2380000000000	62043666	38293	1.09849	0.868706
Cameroon	2100	SSP2	2740000000000	62014443	44179.4	1.26735	0.93789
Cameroon	2020	SSP3	97386500000	26137122	3725.98	0.106886	0.4325
Cameroon	2025	SSP3	119000000000	29709404	3988.7	0.114422	0.438552
Cameroon	2030	SSP3	150000000000	33428217	4482.02	0.128574	0.447438
Cameroon	2035	SSP3	192000000000	37377152	5128.32	0.147114	0.458312
Cameroon	2040	SSP3	238000000000	41530813	5739.43	0.164644	0.468943
Cameroon	2045	SSP3	289000000000	45709480	6326	0.181471	0.479306
Cameroon	2050	SSP3	345000000000	49852837	6928.15	0.198745	0.489823
Cameroon	2055	SSP3	408000000000	53942973	7566.99	0.217071	0.500727
Cameroon	2060	SSP3	477000000000	57886020	8248.35	0.236616	0.512009
Cameroon	2065	SSP3	553000000000	61610776	8976.85	0.257515	0.523665
Cameroon	2070	SSP3	634000000000	65119618	9742.67	0.279483	0.535579
Cameroon	2075	SSP3	722000000000	68165552	10588	0.303734	0.548046
Cameroon	2080	SSP3	815000000000	70837226	11499	0.329866	0.560972
Cameroon	2085	SSP3	912000000000	73027664	12491.4	0.358335	0.574458
Cameroon	2090	SSP3	1020000000000	74979494	13544	0.388529	0.588452
Cameroon	2095	SSP3	1120000000000	76781731	14651.3	0.420294	0.602966
Cameroon	2100	SSP3	1240000000000	78253018	15806.8	0.453442	0.617773
Cameroon	2020	SSP4	97386500000	26137122	3725.98	0.106886	0.4325
Cameroon	2025	SSP4	119000000000	29723885	3986.76	0.114366	0.438542
Cameroon	2030	SSP4	150000000000	33488399	4475.94	0.128399	0.447416
Cameroon	2035	SSP4	193000000000	37486345	5153.85	0.147846	0.458703
Cameroon	2040	SSP4	244000000000	41676840	5861.53	0.168147	0.4705
Cameroon	2045	SSP4	304000000000	45875576	6623.74	0.190012	0.482945
Cameroon	2050	SSP4	375000000000	50024665	7493.96	0.214976	0.496618
Cameroon	2055	SSP4	460000000000	54106577	8507.38	0.244047	0.511919
Cameroon	2060	SSP4	562000000000	58025315	9687.1	0.277889	0.529041
Cameroon	2065	SSP4	682000000000	61714353	11058.7	0.317236	0.548228
Cameroon	2070	SSP4	823000000000	65172887	12632.3	0.362376	0.569598
Cameroon	2075	SSP4	987000000000	68147929	14488.1	0.415614	0.593886
Cameroon	2080	SSP4	1180000000000	70734371	16636.7	0.477251	0.621294
Cameroon	2085	SSP4	1390000000000	72835297	19130	0.548774	0.652351
Cameroon	2090	SSP4	1640000000000	74691837	21966.9	0.630155	0.687246
Cameroon	2095	SSP4	1920000000000	76389699	25169	0.72201	0.726302
Cameroon	2100	SSP4	2240000000000	77745840	28755.2	0.824888	0.769592
Cameroon	2020	SSP5	97386500000	26137122	3725.98	0.106886	0.4325
Cameroon	2025	SSP5	119000000000	29375277	4034.07	0.115724	0.438809
Cameroon	2030	SSP5	150000000000	32488813	4623.71	0.132638	0.448324
Cameroon	2035	SSP5	201000000000	35428604	5666.81	0.162561	0.463027
Cameroon	2040	SSP5	275000000000	38148647	7218.81	0.207083	0.483531
Cameroon	2045	SSP5	381000000000	40754172	9358.55	0.268464	0.51085
Cameroon	2050	SSP5	519000000000	43212759	12010.5	0.344539	0.54407
Cameroon	2055	SSP5	692000000000	45351179	15250	0.437469	0.583932
Cameroon	2060	SSP5	906000000000	47079339	19252.4	0.552284	0.632423
Cameroon	2065	SSP5	1170000000000	48464597	24142.2	0.692555	0.691064
Cameroon	2070	SSP5	1480000000000	49526452	29974.3	0.859858	0.760515
Cameroon	2075	SSP5	1850000000000	50201189	36890	1.05825	0.842385
Cameroon	2080	SSP5	2270000000000	50551591	44970.3	1.29004	0.93768
Cameroon	2085	SSP5	2750000000000	50572460	54390.5	1.56027	1.04845
Cameroon	2090	SSP5	3290000000000	50304774	65309.5	1.8735	1.17661
Cameroon	2095	SSP5	3880000000000	49774904	77902.9	2.23476	1.32424
Cameroon	2100	SSP5	4530000000000	48990407	92383	2.65015	1.49384
Central African Republic	2020	SSP1	4527620000	5272024	858.801	0.024636	0.1404
Central African Republic	2025	SSP1	4931420000	6007006	820.945	0.0235501	0.140565
Central African Republic	2030	SSP1	6104120000	6766849	902.062	0.025877	0.142149
Central African Republic	2035	SSP1	8433320000	7543109	1118.02	0.032072	0.145332
Central African Republic	2040	SSP1	11942400000	8303788	1438.19	0.0412566	0.149727
Central African Republic	2045	SSP1	17202400000	9068490	1896.94	0.0544167	0.155755
Central African Republic	2050	SSP1	24630800000	9796841	2514.16	0.0721225	0.163616
Central African Republic	2055	SSP1	34689200000	10444650	3321.24	0.0952749	0.173643
Central African Republic	2060	SSP1	48091600000	11009551	4368.17	0.125308	0.186421
Central African Republic	2065	SSP1	65547900000	11517347	5691.23	0.163262	0.202398
Central African Republic	2070	SSP1	87478800000	11964463	7311.55	0.209743	0.221819
Central African Republic	2075	SSP1	115000000000	12342727	9281.82	0.266263	0.245299
Central African Republic	2080	SSP1	147000000000	12643438	11649.8	0.334193	0.27339
Central African Republic	2085	SSP1	186000000000	12862784	14462.1	0.414868	0.306637
Central African Republic	2090	SSP1	231000000000	12992703	17800.5	0.510633	0.345995
Central African Republic	2095	SSP1	284000000000	13042783	21739.5	0.623632	0.39235
Central African Republic	2100	SSP1	343000000000	13034254	26333.6	0.75542	0.446357
Central African Republic	2020	SSP2	4527620000	5272024	858.801	0.024636	0.1404
Central African Republic	2025	SSP2	4931420000	6099697	808.47	0.0231922	0.140495
Central African Republic	2030	SSP2	6094840000	7040115	865.73	0.0248348	0.141948
Central African Republic	2035	SSP2	8257580000	8039502	1027.13	0.0294647	0.144675
Central African Republic	2040	SSP2	11292700000	9056416	1246.93	0.03577	0.148103
Central African Republic	2045	SSP2	15596700000	10071138	1548.65	0.0444255	0.152492
Central African Republic	2050	SSP2	21589000000	11083715	1947.81	0.055876	0.158025
Central African Republic	2055	SSP2	29729300000	12067404	2463.6	0.0706722	0.164906
Central African Republic	2060	SSP2	40571300000	13008605	3118.8	0.0894677	0.17339
Central African Republic	2065	SSP2	54838300000	13905094	3943.76	0.113133	0.183833
Central African Republic	2070	SSP2	73159900000	14745262	4961.59	0.142331	0.196497
Central African Republic	2075	SSP2	96429000000	15514895	6215.25	0.178294	0.211875
Central African Republic	2080	SSP2	125000000000	16202266	7743.73	0.222141	0.230416
Central African Republic	2085	SSP2	161000000000	16804812	9589.1	0.275078	0.252613
Central African Republic	2090	SSP2	204000000000	17302789	11817	0.338989	0.27922
Central African Republic	2095	SSP2	256000000000	17703283	14487.6	0.415599	0.310952
Central African Republic	2100	SSP2	318000000000	18035757	17642.1	0.506091	0.348317
Central African Republic	2020	SSP3	4527620000	5272024	858.801	0.024636	0.1404
Central African Republic	2025	SSP3	4931420000	6141263	802.998	0.0230352	0.140465
Central African Republic	2030	SSP3	6085800000	7153783	850.711	0.0244039	0.141866
Central African Republic	2035	SSP3	8067950000	8299846	972.06	0.027885	0.144243
Central African Republic	2040	SSP3	10488200000	9538925	1099.52	0.0315413	0.14677
Central African Republic	2045	SSP3	13376100000	10797292	1238.84	0.035538	0.149452
Central African Republic	2050	SSP3	16868500000	12105188	1393.49	0.0399745	0.152355
Central African Republic	2055	SSP3	21045100000	13454768	1564.14	0.0448697	0.155481
Central African Republic	2060	SSP3	25868000000	14837093	1743.47	0.0500141	0.158736
Central African Republic	2065	SSP3	31464600000	16211227	1940.91	0.0556781	0.162198
Central African Republic	2070	SSP3	37834000000	17557125	2154.91	0.0618169	0.16583
Central African Republic	2075	SSP3	45122500000	18855844	2393.02	0.0686476	0.169707
Central African Republic	2080	SSP3	53357100000	20091365	2655.72	0.0761835	0.173821
Central African Republic	2085	SSP3	62606600000	21256411	2945.3	0.0844906	0.178192
Central African Republic	2090	SSP3	72966200000	22308497	3270.78	0.0938273	0.182892
Central African Republic	2095	SSP3	84551800000	23248343	3636.9	0.10433	0.187976
Central African Republic	2100	SSP3	97477100000	24121131	4041.15	0.115927	0.193453
Central African Republic	2020	SSP4	4527620000	5272024	858.801	0.024636	0.1404
Central African Republic	2025	SSP4	4931420000	6112439	806.784	0.0231438	0.140486
Central African Republic	2030	SSP4	6082250000	7084357	858.547	0.0246287	0.1419
Central African Republic	2035	SSP4	8072400000	8174621	987.495	0.0283278	0.144321
Central African Republic	2040	SSP4	10527800000	9340535	1127.11	0.0323328	0.14693
Central African Republic	2045	SSP4	13450100000	10507774	1280.01	0.0367192	0.149696
Central African Republic	2050	SSP4	16998200000	11707276	1451.93	0.041651	0.152712
Central African Republic	2055	SSP4	21281700000	12930635	1645.84	0.0472133	0.156007
Central African Republic	2060	SSP4	26289300000	14167849	1855.56	0.0532296	0.159499
Central African Republic	2065	SSP4	32211100000	15390087	2092.98	0.0600403	0.163304
Central African Republic	2070	SSP4	39109200000	16581244	2358.64	0.0676612	0.167416
Central African Republic	2075	SSP4	47217800000	17727101	2663.59	0.0764093	0.171952
Central African Republic	2080	SSP4	56667300000	18815546	3011.73	0.086396	0.176948
Central African Republic	2085	SSP4	67661200000	19842678	3409.88	0.0978177	0.182482
Central African Republic	2090	SSP4	80467100000	20771876	3873.85	0.111127	0.188707
Central African Republic	2095	SSP4	95418700000	21606147	4416.28	0.126688	0.195777
Central African Republic	2100	SSP4	113000000000	22389371	5042.62	0.144655	0.203791
Central African Republic	2020	SSP5	4527620000	5272024	858.801	0.024636	0.1404
Central African Republic	2025	SSP5	4931420000	5946780	829.259	0.0237886	0.140612
Central African Republic	2030	SSP5	6097080000	6625071	920.304	0.0264003	0.142246
Central African Republic	2035	SSP5	8541570000	7300236	1170.04	0.0335644	0.145742
Central African Republic	2040	SSP5	12614600000	7943018	1588.14	0.0455581	0.151191
Central African Republic	2045	SSP5	19110300000	8573191	2229.08	0.0639445	0.159249
Central African Republic	2050	SSP5	28463400000	9153152	3109.68	0.089206	0.170084
Central African Republic	2055	SSP5	41335100000	9642871	4286.6	0.122968	0.184328
Central African Republic	2060	SSP5	58792200000	10042702	5854.22	0.167937	0.203091
Central African Republic	2065	SSP5	82063300000	10393286	7895.8	0.226503	0.227385
Central African Republic	2070	SSP5	112000000000	10695034	10477.9	0.300576	0.257995
Central African Republic	2075	SSP5	150000000000	10944002	13721.6	0.393625	0.296338
Central African Republic	2080	SSP5	198000000000	11135584	17750	0.509187	0.343861
Central African Republic	2085	SSP5	256000000000	11268978	22697.2	0.651103	0.402138
Central African Republic	2090	SSP5	326000000000	11339156	28766.8	0.825219	0.473559
Central African Republic	2095	SSP5	411000000000	11356033	36171.3	1.03763	0.56063
Central African Republic	2100	SSP5	511000000000	11339075	45108.2	1.294	0.665691
Chad	2020	SSP1	24889900000	16379190	1519.61	0.0435922	0.1557
Chad	2025	SSP1	28258300000	18890702	1495.88	0.0429117	0.157505
Chad	2030	SSP1	34230000000	21306238	1606.57	0.046087	0.16081
Chad	2035	SSP1	47478100000	23716396	2001.91	0.0574279	0.167457
Chad	2040	SSP1	66262500000	26069481	2541.77	0.0729144	0.175757
Chad	2045	SSP1	92189000000	28395386	3246.62	0.0931342	0.185973
Chad	2050	SSP1	126000000000	30617681	4124.71	0.118324	0.198141
Chad	2055	SSP1	170000000000	32664290	5204.09	0.149287	0.21253
Chad	2060	SSP1	225000000000	34476452	6537.82	0.187548	0.229714
Chad	2065	SSP1	295000000000	36079769	8164.63	0.234215	0.250171
Chad	2070	SSP1	379000000000	37445010	10121.6	0.290355	0.274313
Chad	2075	SSP1	479000000000	38577729	12427.2	0.356494	0.302361
Chad	2080	SSP1	595000000000	39429020	15102.8	0.433246	0.334524
Chad	2085	SSP1	727000000000	40022575	18164.9	0.521088	0.371019
Chad	2090	SSP1	874000000000	40302986	21697	0.62241	0.41278
Chad	2095	SSP1	1040000000000	40257808	25773.4	0.739349	0.460671
Chad	2100	SSP1	1220000000000	39910165	30470.9	0.874105	0.515613
Chad	2020	SSP2	24889900000	16379190	1519.61	0.0435922	0.1557
Chad	2025	SSP2	28258300000	19218825	1470.34	0.0421791	0.157477
Chad	2030	SSP2	34213000000	22315160	1533.17	0.0439814	0.160784
Chad	2035	SSP2	46812400000	25670817	1823.56	0.0523117	0.166982
Chad	2040	SSP2	63749700000	29235324	2180.57	0.062553	0.174136
Chad	2045	SSP2	86208800000	32898867	2620.42	0.0751707	0.182347
Chad	2050	SSP2	116000000000	36610216	3166.08	0.0908239	0.191841
Chad	2055	SSP2	155000000000	40294402	3841.7	0.110205	0.202841
Chad	2060	SSP2	205000000000	43867644	4672.03	0.134024	0.215568
Chad	2065	SSP2	269000000000	47299204	5681.51	0.162983	0.230284
Chad	2070	SSP2	348000000000	50526179	6893.81	0.19776	0.247214
Chad	2075	SSP2	446000000000	53547055	8323.02	0.238758	0.266524
Chad	2080	SSP2	562000000000	56244566	9997.5	0.286794	0.288449
Chad	2085	SSP2	700000000000	58669543	11929.4	0.342212	0.313175
Chad	2090	SSP2	861000000000	60693832	14181.1	0.406806	0.341328
Chad	2095	SSP2	1050000000000	62267902	16801	0.481961	0.373437
Chad	2100	SSP2	1260000000000	63409584	19838.6	0.569102	0.410099
Chad	2020	SSP3	24889900000	16379190	1519.61	0.0435922	0.1557
Chad	2025	SSP3	28258300000	19341162	1461.04	0.0419123	0.157469
Chad	2030	SSP3	34150000000	22774974	1499.45	0.0430141	0.160769
Chad	2035	SSP3	45752100000	26724845	1711.97	0.0491104	0.166544
Chad	2040	SSP3	59741400000	31212042	1914.05	0.0549074	0.172643
Chad	2045	SSP3	75914800000	35997979	2108.86	0.060496	0.178903
Chad	2050	SSP3	94998700000	41082674	2312.38	0.0663341	0.185514
Chad	2055	SSP3	118000000000	46411658	2533.78	0.0726854	0.192538
Chad	2060	SSP3	144000000000	51888766	2768.44	0.079417	0.199841
Chad	2065	SSP3	173000000000	57399698	3018.17	0.0865808	0.207349
Chad	2070	SSP3	206000000000	62843279	3280.96	0.0941192	0.214954
Chad	2075	SSP3	242000000000	68215287	3549.91	0.101835	0.222573
Chad	2080	SSP3	281000000000	73307086	3827.82	0.109807	0.230064
Chad	2085	SSP3	321000000000	78213199	4105.56	0.117774	0.2374
Chad	2090	SSP3	364000000000	82677926	4397.22	0.126141	0.244533
Chad	2095	SSP3	407000000000	86593701	4704.86	0.134966	0.251398
Chad	2100	SSP3	453000000000	90027556	5026.86	0.144203	0.258033
Chad	2020	SSP4	24889900000	16379190	1519.61	0.0435922	0.1557
Chad	2025	SSP4	28258300000	19370157	1458.86	0.0418496	0.157467
Chad	2030	SSP4	34178400000	22849233	1495.82	0.04291	0.160788
Chad	2035	SSP4	46103400000	26858401	1716.54	0.0492414	0.166709
Chad	2040	SSP4	60735900000	31415138	1933.33	0.0554606	0.173038
Chad	2045	SSP4	77740300000	36273870	2143.15	0.0614795	0.179535
Chad	2050	SSP4	98005500000	41435717	2365.24	0.0678506	0.186429
Chad	2055	SSP4	122000000000	46845380	2611.21	0.0749065	0.193808
Chad	2060	SSP4	151000000000	52404459	2877.03	0.0825319	0.201545
Chad	2065	SSP4	184000000000	57996162	3165.42	0.0908048	0.209575
Chad	2070	SSP4	221000000000	63518266	3475.39	0.099697	0.2178
Chad	2075	SSP4	262000000000	68966660	3800.78	0.109031	0.226146
Chad	2080	SSP4	307000000000	74129550	4145.74	0.118927	0.234485
Chad	2085	SSP4	356000000000	79104237	4501.49	0.129132	0.242794
Chad	2090	SSP4	409000000000	83632639	4884.68	0.140125	0.251056
Chad	2095	SSP4	464000000000	87607369	5299.46	0.152023	0.25923
Chad	2100	SSP4	523000000000	91099348	5745.95	0.164831	0.267377
Chad	2020	SSP5	24889900000	16379190	1519.61	0.0435922	0.1557
Chad	2025	SSP5	28258300000	18929577	1492.81	0.0428236	0.157501
Chad	2030	SSP5	34281200000	21383842	1603.14	0.0459884	0.160834
Chad	2035	SSP5	48658400000	23830099	2041.89	0.0585747	0.168022
Chad	2040	SSP5	71244700000	26215057	2717.7	0.0779614	0.177946
Chad	2045	SSP5	105000000000	28567899	3668.84	0.105246	0.191081
Chad	2050	SSP5	151000000000	30811921	4887.1	0.140194	0.207266
Chad	2055	SSP5	211000000000	32874910	6425.69	0.184331	0.227067
Chad	2060	SSP5	291000000000	34697849	8383.98	0.240507	0.251604
Chad	2065	SSP5	394000000000	36304612	10852.1	0.311308	0.281955
Chad	2070	SSP5	525000000000	37667075	13925.3	0.399469	0.319219
Chad	2075	SSP5	686000000000	38792278	17681.1	0.507209	0.364311
Chad	2080	SSP5	880000000000	39632572	22206.7	0.637033	0.418217
Chad	2085	SSP5	1110000000000	40213163	27590.7	0.791482	0.482001
Chad	2090	SSP5	1380000000000	40479537	34034.5	0.976331	0.557984
Chad	2095	SSP5	1690000000000	40420095	41747.1	1.19758	0.648614
Chad	2100	SSP5	2040000000000	40058642	50963.3	1.46196	0.756673
Chile	2020	SSP1	410000000000	19206692	21366.2	0.612922	0.8259
Chile	2025	SSP1	490000000000	19550567	25046.7	0.718503	0.869458
Chile	2030	SSP1	527000000000	19861461	26555.6	0.761788	0.887457
Chile	2035	SSP1	588000000000	20059831	29319.9	0.841086	0.920123
Chile	2040	SSP1	666000000000	20132679	33087.2	0.949157	0.964477
Chile	2045	SSP1	760000000000	20114683	37789.3	1.08404	1.01975
Chile	2050	SSP1	859000000000	20017714	42906.8	1.23085	1.07984
Chile	2055	SSP1	955000000000	19827569	48166.9	1.38174	1.14152
Chile	2060	SSP1	1050000000000	19534399	53555.8	1.53633	1.20464
Chile	2065	SSP1	1130000000000	19149682	59256.9	1.69987	1.27135
Chile	2070	SSP1	1220000000000	18691582	65179.6	1.86978	1.3406
Chile	2075	SSP1	1290000000000	18168602	71056.7	2.03837	1.40927
Chile	2080	SSP1	1350000000000	17581474	76700.1	2.20026	1.47513
Chile	2085	SSP1	1390000000000	16922818	82040.1	2.35345	1.53737
Chile	2090	SSP1	1410000000000	16182589	87049.7	2.49715	1.59566
Chile	2095	SSP1	1410000000000	15361988	91680.2	2.62999	1.64942
Chile	2100	SSP1	1390000000000	14487942	95833.5	2.74913	1.69753
Chile	2020	SSP2	410000000000	19206692	21366.2	0.612922	0.8259
Chile	2025	SSP2	490000000000	19581017	25007.7	0.717385	0.869026
Chile	2030	SSP2	527000000000	19949889	26425	0.75804	0.885994
Chile	2035	SSP2	583000000000	20227035	28810.9	0.826485	0.914277
Chile	2040	SSP2	646000000000	20394901	31677.2	0.90871	0.948117
Chile	2045	SSP2	716000000000	20457771	35005.9	1.0042	0.987305
Chile	2050	SSP2	791000000000	20438799	38682.1	1.10966	1.03051
Chile	2055	SSP2	866000000000	20329918	42603.9	1.22216	1.07653
Chile	2060	SSP2	941000000000	20131603	46767.1	1.34158	1.12532
Chile	2065	SSP2	1020000000000	19854625	51358.8	1.47331	1.17907
Chile	2070	SSP2	1100000000000	19514107	56338.7	1.61616	1.23734
Chile	2075	SSP2	1180000000000	19111552	61538.2	1.76532	1.29814
Chile	2080	SSP2	1250000000000	18652049	66838.8	1.91737	1.36008
Chile	2085	SSP2	1310000000000	18140830	72187.4	2.07081	1.42254
Chile	2090	SSP2	1360000000000	17592384	77533	2.22415	1.48494
Chile	2095	SSP2	1410000000000	17030712	82795.7	2.37512	1.54635
Chile	2100	SSP2	1450000000000	16482444	87874.1	2.5208	1.6056
Chile	2020	SSP3	410000000000	19206692	21366.2	0.612922	0.8259
Chile	2025	SSP3	490000000000	19595456	24989.3	0.716857	0.868821
Chile	2030	SSP3	527000000000	20005904	26334.4	0.755442	0.884976
Chile	2035	SSP3	575000000000	20345499	28283.1	0.811343	0.908169
Chile	2040	SSP3	620000000000	20592143	30100.5	0.863479	0.929742
Chile	2045	SSP3	656000000000	20721209	31664.8	0.908352	0.948241
Chile	2050	SSP3	685000000000	20769952	32995	0.946511	0.963921
Chile	2055	SSP3	707000000000	20741191	34102.6	0.978286	0.97692
Chile	2060	SSP3	723000000000	20647114	35005.5	1.00419	0.987457
Chile	2065	SSP3	736000000000	20500535	35881.3	1.02931	0.997633
Chile	2070	SSP3	747000000000	20318200	36742.2	1.05401	1.0076
Chile	2075	SSP3	755000000000	20101461	37548.3	1.07713	1.0169
Chile	2080	SSP3	760000000000	19856394	38299	1.09867	1.02553
Chile	2085	SSP3	765000000000	19604134	39014.3	1.11918	1.03373
Chile	2090	SSP3	769000000000	19373553	39695.8	1.13873	1.04155
Chile	2095	SSP3	774000000000	19190733	40331.5	1.15697	1.04887
Chile	2100	SSP3	780000000000	19068152	40905.1	1.17342	1.05551
Chile	2020	SSP4	410000000000	19206692	21366.2	0.612922	0.8259
Chile	2025	SSP4	490000000000	19620030	24958	0.715959	0.868473
Chile	2030	SSP4	528000000000	20066714	26295.3	0.754322	0.884567
Chile	2035	SSP4	588000000000	20445988	28759.1	0.825	0.91385
Chile	2040	SSP4	666000000000	20731100	32135.6	0.921858	0.953785
Chile	2045	SSP4	763000000000	20893394	36501.3	1.04709	1.00525
Chile	2050	SSP4	868000000000	20976387	41397	1.18754	1.06288
Chile	2055	SSP4	977000000000	20984001	46580.2	1.33622	1.12383
Chile	2060	SSP4	1090000000000	20928842	51944.6	1.49011	1.18685
Chile	2065	SSP4	1200000000000	20819426	57639.9	1.65349	1.25372
Chile	2070	SSP4	1310000000000	20669639	63590.9	1.8242	1.32357
Chile	2075	SSP4	1430000000000	20478620	69631.6	1.99749	1.39443
Chile	2080	SSP4	1530000000000	20251952	75655.9	2.17031	1.46507
Chile	2085	SSP4	1630000000000	20011495	81602.6	2.3409	1.53479
Chile	2090	SSP4	1730000000000	19786194	87399.8	2.5072	1.60277
Chile	2095	SSP4	1820000000000	19601477	92974.1	2.6671	1.66815
Chile	2100	SSP4	1910000000000	19468968	98271.3	2.81906	1.73032
Chile	2020	SSP5	410000000000	19206692	21366.2	0.612922	0.8259
Chile	2025	SSP5	490000000000	19583272	25004.9	0.717303	0.868994
Chile	2030	SSP5	528000000000	19931381	26491.8	0.759958	0.886765
Chile	2035	SSP5	599000000000	20171449	29695.3	0.851855	0.924629
Chile	2040	SSP5	705000000000	20290334	34764.9	0.997284	0.984333
Chile	2045	SSP5	845000000000	20322386	41580.9	1.19281	1.0645
Chile	2050	SSP5	998000000000	20278752	49189.6	1.41108	1.15392
Chile	2055	SSP5	1150000000000	20144301	57285.2	1.64331	1.24899
Chile	2060	SSP5	1310000000000	19908394	65930	1.8913	1.35044
Chile	2065	SSP5	1480000000000	19576250	75413.8	2.16336	1.46167
Chile	2070	SSP5	1640000000000	19165410	85676.2	2.45775	1.58199
Chile	2075	SSP5	1800000000000	18683875	96410.4	2.76568	1.70779
Chile	2080	SSP5	1950000000000	18131711	107391	3.08067	1.83644
Chile	2085	SSP5	2070000000000	17500690	118523	3.40002	1.9668
Chile	2090	SSP5	2180000000000	16780118	129765	3.72252	2.09838
Chile	2095	SSP5	2250000000000	15970678	141037	4.04587	2.23024
Chile	2100	SSP5	2300000000000	15098165	152177	4.36542	2.36049
Comoros	2020	SSP1	2597850000	798327	3254.12	0.0933493	0.2799
Comoros	2025	SSP1	3018430000	874155	3452.97	0.0990537	0.282301
Comoros	2030	SSP1	3744010000	943155	3969.67	0.113876	0.288433
Comoros	2035	SSP1	4894720000	1004507	4872.76	0.139783	0.299102
Comoros	2040	SSP1	7035260000	1058256	6647.98	0.190707	0.320019
Comoros	2045	SSP1	10278000000	1107148	9283.31	0.266306	0.351044
Comoros	2050	SSP1	14380000000	1148975	12515.5	0.359026	0.389081
Comoros	2055	SSP1	19131700000	1181253	16196.1	0.46461	0.432382
Comoros	2060	SSP1	24430300000	1202501	20316.2	0.582802	0.480842
Comoros	2065	SSP1	30210900000	1215990	24844.7	0.712708	0.534096
Comoros	2070	SSP1	36283600000	1220798	29721.2	0.852599	0.591435
Comoros	2075	SSP1	42541100000	1218287	34918.8	1.0017	0.652543
Comoros	2080	SSP1	48822400000	1207923	40418.5	1.15947	0.717196
Comoros	2085	SSP1	55045900000	1191294	46206.8	1.32551	0.785238
Comoros	2090	SSP1	61181100000	1169207	52327	1.50108	0.857178
Comoros	2095	SSP1	67167000000	1142010	58814.7	1.68719	0.933434
Comoros	2100	SSP1	72975100000	1110020	65742.1	1.88591	1.01486
Comoros	2020	SSP2	2597850000	798327	3254.12	0.0933493	0.2799
Comoros	2025	SSP2	3018430000	880909	3426.49	0.0982942	0.281995
Comoros	2030	SSP2	3732570000	963351	3874.57	0.111148	0.287332
Comoros	2035	SSP2	4736990000	1043395	4539.98	0.130236	0.295222
Comoros	2040	SSP2	6511960000	1120933	5809.41	0.166652	0.310211
Comoros	2045	SSP2	9138290000	1194869	7647.94	0.219393	0.331889
Comoros	2050	SSP2	12548500000	1263599	9930.76	0.284879	0.358786
Comoros	2055	SSP2	16672400000	1324686	12585.9	0.361047	0.390055
Comoros	2060	SSP2	21450400000	1376028	15588.6	0.447184	0.425401
Comoros	2065	SSP2	26843600000	1419503	18910.6	0.542478	0.464495
Comoros	2070	SSP2	32718900000	1452683	22523.1	0.646109	0.506996
Comoros	2075	SSP2	39018400000	1477546	26407.6	0.757542	0.552688
Comoros	2080	SSP2	45651300000	1493277	30571.2	0.876982	0.601655
Comoros	2085	SSP2	52548800000	1502721	34969.1	1.00314	0.65337
Comoros	2090	SSP2	59695000000	1507149	39607.9	1.13621	0.707914
Comoros	2095	SSP2	67031300000	1506713	44488.4	1.27622	0.765296
Comoros	2100	SSP2	74572600000	1501228	49674.4	1.42499	0.826265
Comoros	2020	SSP3	2597850000	798327	3254.12	0.0933493	0.2799
Comoros	2025	SSP3	3018430000	888971	3395.42	0.0974028	0.281637
Comoros	2030	SSP3	3720390000	986252	3772.25	0.108213	0.286148
Comoros	2035	SSP3	4570390000	1088303	4199.56	0.120471	0.291256
Comoros	2040	SSP3	5926530000	1195622	4956.86	0.142195	0.300249
Comoros	2045	SSP3	7716940000	1303375	5920.74	0.169845	0.311672
Comoros	2050	SSP3	9865100000	1411149	6990.83	0.200543	0.324342
Comoros	2055	SSP3	12308900000	1517401	8111.83	0.2327	0.337611
Comoros	2060	SSP3	14968500000	1620016	9239.72	0.265056	0.350957
Comoros	2065	SSP3	17795100000	1718438	10355.4	0.29706	0.364156
Comoros	2070	SSP3	20704100000	1807256	11456.1	0.328636	0.377171
Comoros	2075	SSP3	23671700000	1888442	12535	0.359587	0.389924
Comoros	2080	SSP3	26653700000	1959963	13599.1	0.390111	0.402494
Comoros	2085	SSP3	29605200000	2026684	14607.7	0.419044	0.414408
Comoros	2090	SSP3	32518600000	2090496	15555.4	0.446232	0.425604
Comoros	2095	SSP3	35363600000	2150523	16444.2	0.471727	0.436103
Comoros	2100	SSP3	38173200000	2205597	17307.4	0.49649	0.446298
Comoros	2020	SSP4	2597850000	798327	3254.12	0.0933493	0.2799
Comoros	2025	SSP4	3018430000	886853	3403.53	0.0976354	0.28173
Comoros	2030	SSP4	3723520000	981915	3792.1	0.108782	0.286378
Comoros	2035	SSP4	4630270000	1081119	4282.85	0.12286	0.29223
Comoros	2040	SSP4	6155550000	1184627	5196.19	0.149061	0.303054
Comoros	2045	SSP4	8295620000	1287381	6443.8	0.18485	0.317808
Comoros	2050	SSP4	11020500000	1388890	7934.75	0.227621	0.335422
Comoros	2055	SSP4	14313500000	1487639	9621.62	0.276011	0.355337
Comoros	2060	SSP4	18135200000	1581438	11467.5	0.328964	0.377118
Comoros	2065	SSP4	22485900000	1670616	13459.6	0.386111	0.400614
Comoros	2070	SSP4	27310400000	1749867	15607.1	0.447714	0.425929
Comoros	2075	SSP4	32623500000	1821538	17909.9	0.513772	0.453062
Comoros	2080	SSP4	38409700000	1884176	20385.4	0.584787	0.48222
Comoros	2085	SSP4	44640100000	1942548	22980.2	0.659222	0.512777
Comoros	2090	SSP4	51338400000	1998410	25689.6	0.736946	0.544679
Comoros	2095	SSP4	58494100000	2051008	28519.7	0.818131	0.577997
Comoros	2100	SSP4	66196700000	2099207	31534.1	0.904605	0.613479
Comoros	2020	SSP5	2597850000	798327	3254.12	0.0933493	0.2799
Comoros	2025	SSP5	3018430000	868323	3476.16	0.099719	0.282569
Comoros	2030	SSP5	3757820000	929591	4042.44	0.115964	0.289278
Comoros	2035	SSP5	5090210000	981666	5185.28	0.148748	0.302758
Comoros	2040	SSP5	7718110000	1025061	7529.42	0.215993	0.330355
Comoros	2045	SSP5	11802500000	1062776	11105.4	0.318574	0.37243
Comoros	2050	SSP5	16973600000	1092841	15531.6	0.445549	0.424496
Comoros	2055	SSP5	23015800000	1113145	20676.4	0.593133	0.485002
Comoros	2060	SSP5	29893400000	1122534	26630.3	0.76393	0.555012
Comoros	2065	SSP5	37645200000	1125398	33450.6	0.959581	0.635203
Comoros	2070	SSP5	46118800000	1121173	41134.4	1.18	0.725542
Comoros	2075	SSP5	55251000000	1111392	49713.3	1.4261	0.8264
Comoros	2080	SSP5	64892800000	1095703	59224.8	1.69895	0.938217
Comoros	2085	SSP5	74989200000	1075658	69714.7	1.99987	1.06153
Comoros	2090	SSP5	85548600000	1051992	81320.6	2.33281	1.19797
Comoros	2095	SSP5	96533900000	1024970	94182.2	2.70176	1.34917
Comoros	2100	SSP5	108000000000	994810	108508	3.11272	1.51758
Congo	2020	SSP1	21377200000	5635288	3793.45	0.108821	0.3786
Congo	2025	SSP1	24657000000	6299866	3913.89	0.112276	0.380567
Congo	2030	SSP1	29930600000	6941953	4311.55	0.123684	0.385775
Congo	2035	SSP1	36794300000	7557411	4868.64	0.139664	0.392836
Congo	2040	SSP1	45684300000	8126337	5621.76	0.161269	0.402163
Congo	2045	SSP1	57189000000	8658409	6605.02	0.189475	0.414165
Congo	2050	SSP1	71450000000	9153761	7805.53	0.223914	0.428691
Congo	2055	SSP1	88694400000	9569169	9268.77	0.265889	0.446239
Congo	2060	SSP1	109000000000	9896155	11053.6	0.317089	0.467495
Congo	2065	SSP1	134000000000	10153541	13187.5	0.378304	0.492798
Congo	2070	SSP1	162000000000	10338189	15651.1	0.448976	0.521917
Congo	2075	SSP1	193000000000	10447337	18482.5	0.530199	0.555297
Congo	2080	SSP1	228000000000	10488829	21697.4	0.622422	0.59313
Congo	2085	SSP1	265000000000	10473960	25304.2	0.725889	0.635524
Congo	2090	SSP1	305000000000	10403793	29321.4	0.84113	0.682699
Congo	2095	SSP1	347000000000	10274860	33773.3	0.968839	0.734934
Congo	2100	SSP1	390000000000	10082782	38710.7	1.11048	0.792826
Congo	2020	SSP2	21377200000	5635288	3793.45	0.108821	0.3786
Congo	2025	SSP2	24657000000	6343073	3887.23	0.111511	0.38029
Congo	2030	SSP2	29913100000	7073203	4229.07	0.121317	0.384915
Congo	2035	SSP2	36409200000	7819626	4656.13	0.133568	0.390555
Congo	2040	SSP2	44298900000	8560861	5174.58	0.148441	0.397266
Congo	2045	SSP2	54089700000	9274492	5832.09	0.167303	0.405588
Congo	2050	SSP2	66279200000	9950906	6660.62	0.19107	0.415891
Congo	2055	SSP2	81375100000	10571254	7697.77	0.220822	0.428599
Congo	2060	SSP2	99804900000	11124508	8971.62	0.257365	0.444036
Congo	2065	SSP2	122000000000	11621461	10499.5	0.301193	0.462411
Congo	2070	SSP2	148000000000	12045011	12291.4	0.352598	0.483831
Congo	2075	SSP2	178000000000	12376665	14399	0.413056	0.508886
Congo	2080	SSP2	213000000000	12622091	16851.6	0.483415	0.537927
Congo	2085	SSP2	252000000000	12796559	19654.2	0.563811	0.571022
Congo	2090	SSP2	294000000000	12905469	22810.7	0.65436	0.608225
Congo	2095	SSP2	341000000000	12950438	26338.8	0.755569	0.649743
Congo	2100	SSP2	392000000000	12934565	30287.4	0.86884	0.696155
Congo	2020	SSP3	21377200000	5635288	3793.45	0.108821	0.3786
Congo	2025	SSP3	24657000000	6347344	3884.62	0.111436	0.380263
Congo	2030	SSP3	29886700000	7092673	4213.74	0.120878	0.384751
Congo	2035	SSP3	35794800000	7899535	4531.25	0.129986	0.389153
Congo	2040	SSP3	42055100000	8752324	4805.02	0.137839	0.393079
Congo	2045	SSP3	48745800000	9599075	5078.18	0.145675	0.396993
Congo	2050	SSP3	56259000000	10440958	5388.3	0.154572	0.401338
Congo	2055	SSP3	64824000000	11266802	5753.54	0.165049	0.406317
Congo	2060	SSP3	74303900000	12069040	6156.57	0.176611	0.411721
Congo	2065	SSP3	84683300000	12849853	6590.22	0.18905	0.417468
[truncated: 8,031 more rows]

## Sheet: 4|Region based on 62 Countries
Region	Scenario	Year	min	max	mean
Central and Eastern Europe	Historical	2003	0.530651	0.530651	0.530651			Min, max, mean of digital transformation are generated based on the variation or uncertainty contributed by the different models in estimating the future R&D expenditure (Independent variables) as clarified in Supplementary Table 7
Central and Eastern Europe	Historical	2004	0.569961	0.569961	0.569961
Central and Eastern Europe	Historical	2005	0.585941	0.585941	0.585941
Central and Eastern Europe	Historical	2008	0.597822	0.597822	0.597822
Central and Eastern Europe	Historical	2010	0.570621	0.570621	0.570621
Central and Eastern Europe	Historical	2012	0.646387	0.646387	0.646387
Central and Eastern Europe	Historical	2014	0.61699	0.61699	0.61699
Central and Eastern Europe	Historical	2016	0.662203	0.662203	0.662203
Central and Eastern Europe	Historical	2018	0.729753	0.729753	0.729753
Central and Eastern Europe	Historical	2020	0.806118	0.806118	0.806118
Central and Eastern Europe	SSP1	2020	0.806118	0.806118	0.806118
Central and Eastern Europe	SSP1	2025	0.870752	0.871264	0.871008
Central and Eastern Europe	SSP1	2030	0.942337	0.943395	0.942866
Central and Eastern Europe	SSP1	2035	1.01301	1.01456	1.01379
Central and Eastern Europe	SSP1	2040	1.08223	1.08421	1.08322
Central and Eastern Europe	SSP1	2045	1.14237	1.14466	1.14352
Central and Eastern Europe	SSP1	2050	1.19388	1.19641	1.19515
Central and Eastern Europe	SSP1	2055	1.24121	1.24392	1.24256
Central and Eastern Europe	SSP1	2060	1.28849	1.29135	1.28992
Central and Eastern Europe	SSP1	2065	1.33737	1.34036	1.33887
Central and Eastern Europe	SSP1	2070	1.38582	1.38888	1.38735
Central and Eastern Europe	SSP1	2075	1.43223	1.43533	1.43378
Central and Eastern Europe	SSP1	2080	1.47566	1.47876	1.47721
Central and Eastern Europe	SSP1	2085	1.51647	1.51954	1.518
Central and Eastern Europe	SSP1	2090	1.55555	1.55857	1.55706
Central and Eastern Europe	SSP1	2095	1.59351	1.59644	1.59498
Central and Eastern Europe	SSP1	2100	1.6301	1.63292	1.63151
Central and Eastern Europe	SSP2	2020	0.806118	0.806118	0.806118
Central and Eastern Europe	SSP2	2025	0.8711	0.871616	0.871358
Central and Eastern Europe	SSP2	2030	0.942291	0.94335	0.94282
Central and Eastern Europe	SSP2	2035	1.00523	1.00673	1.00598
Central and Eastern Europe	SSP2	2040	1.06161	1.06346	1.06254
Central and Eastern Europe	SSP2	2045	1.10874	1.11086	1.1098
Central and Eastern Europe	SSP2	2050	1.15117	1.15351	1.15234
Central and Eastern Europe	SSP2	2055	1.19201	1.19454	1.19328
Central and Eastern Europe	SSP2	2060	1.23357	1.23626	1.23492
Central and Eastern Europe	SSP2	2065	1.27685	1.27968	1.27826
Central and Eastern Europe	SSP2	2070	1.31982	1.32277	1.32129
Central and Eastern Europe	SSP2	2075	1.36101	1.36405	1.36253
Central and Eastern Europe	SSP2	2080	1.39969	1.40277	1.40123
Central and Eastern Europe	SSP2	2085	1.43648	1.43959	1.43804
Central and Eastern Europe	SSP2	2090	1.47251	1.47562	1.47406
Central and Eastern Europe	SSP2	2095	1.50853	1.51162	1.51007
Central and Eastern Europe	SSP2	2100	1.54439	1.54743	1.54591
Central and Eastern Europe	SSP3	2020	0.806118	0.806118	0.806118
Central and Eastern Europe	SSP3	2025	0.870103	0.87061	0.870357
Central and Eastern Europe	SSP3	2030	0.938034	0.939061	0.938548
Central and Eastern Europe	SSP3	2035	0.986576	0.98795	0.987263
Central and Eastern Europe	SSP3	2040	1.01955	1.02114	1.02035
Central and Eastern Europe	SSP3	2045	1.03837	1.04009	1.03923
Central and Eastern Europe	SSP3	2050	1.05105	1.05285	1.05195
Central and Eastern Europe	SSP3	2055	1.06089	1.06275	1.06182
Central and Eastern Europe	SSP3	2060	1.06875	1.07066	1.06971
Central and Eastern Europe	SSP3	2065	1.07498	1.07693	1.07596
Central and Eastern Europe	SSP3	2070	1.07796	1.07993	1.07894
Central and Eastern Europe	SSP3	2075	1.07716	1.07913	1.07814
Central and Eastern Europe	SSP3	2080	1.07284	1.07478	1.07381
Central and Eastern Europe	SSP3	2085	1.06627	1.06817	1.06722
Central and Eastern Europe	SSP3	2090	1.05867	1.06053	1.0596
Central and Eastern Europe	SSP3	2095	1.05066	1.05248	1.05157
Central and Eastern Europe	SSP3	2100	1.04208	1.04384	1.04296
Central and Eastern Europe	SSP4	2020	0.806118	0.806118	0.806118
Central and Eastern Europe	SSP4	2025	0.871979	0.872502	0.87224
Central and Eastern Europe	SSP4	2030	0.946234	0.947322	0.946778
Central and Eastern Europe	SSP4	2035	1.01897	1.02056	1.01976
Central and Eastern Europe	SSP4	2040	1.08823	1.09024	1.08923
Central and Eastern Europe	SSP4	2045	1.14582	1.14814	1.14698
Central and Eastern Europe	SSP4	2050	1.19319	1.19572	1.19445
Central and Eastern Europe	SSP4	2055	1.23506	1.23776	1.23641
Central and Eastern Europe	SSP4	2060	1.27602	1.27885	1.27744
Central and Eastern Europe	SSP4	2065	1.31781	1.32075	1.31928
Central and Eastern Europe	SSP4	2070	1.35865	1.36167	1.36016
Central and Eastern Europe	SSP4	2075	1.39711	1.40019	1.39865
Central and Eastern Europe	SSP4	2080	1.43239	1.43549	1.43394
Central and Eastern Europe	SSP4	2085	1.4649	1.468	1.46645
Central and Eastern Europe	SSP4	2090	1.49545	1.49853	1.49699
Central and Eastern Europe	SSP4	2095	1.52483	1.52788	1.52636
Central and Eastern Europe	SSP4	2100	1.55323	1.55623	1.55473
Central and Eastern Europe	SSP5	2020	0.806118	0.806118	0.806118
Central and Eastern Europe	SSP5	2025	0.872356	0.872881	0.872618
Central and Eastern Europe	SSP5	2030	0.947949	0.949049	0.948499
Central and Eastern Europe	SSP5	2035	1.03477	1.03646	1.03561
Central and Eastern Europe	SSP5	2040	1.12989	1.13212	1.131
Central and Eastern Europe	SSP5	2045	1.21947	1.2221	1.22078
Central and Eastern Europe	SSP5	2050	1.30006	1.30295	1.3015
Central and Eastern Europe	SSP5	2055	1.379	1.38203	1.38051
Central and Eastern Europe	SSP5	2060	1.46266	1.46575	1.46421
Central and Eastern Europe	SSP5	2065	1.55367	1.55669	1.55518
Central and Eastern Europe	SSP5	2070	1.64971	1.65251	1.65111
Central and Eastern Europe	SSP5	2075	1.74875	1.75116	1.74995
Central and Eastern Europe	SSP5	2080	1.84956	1.8514	1.85048
Central and Eastern Europe	SSP5	2085	1.95257	1.95366	1.95312
Central and Eastern Europe	SSP5	2090	2.05908	2.05922	2.05915
Central and Eastern Europe	SSP5	2095	2.16899	2.17005	2.16952
Central and Eastern Europe	SSP5	2100	2.28273	2.28525	2.28399
China	Historical	2003	0.41595	0.41595	0.41595
China	Historical	2004	0.43557	0.43557	0.43557
China	Historical	2005	0.50778	0.50778	0.50778
China	Historical	2008	0.5017	0.5017	0.5017
China	Historical	2010	0.46998	0.46998	0.46998
China	Historical	2012	0.5359	0.5359	0.5359
China	Historical	2014	0.54501	0.54501	0.54501
China	Historical	2016	0.60713	0.60713	0.60713
China	Historical	2018	0.6811	0.6811	0.6811
China	Historical	2020	0.7948	0.7948	0.7948
China	SSP1	2020	0.7948	0.7948	0.7948
China	SSP1	2025	0.852345	0.852716	0.852531
China	SSP1	2030	0.898735	0.899525	0.89913
China	SSP1	2035	0.943243	0.944498	0.94387
China	SSP1	2040	0.982397	0.984105	0.983251
China	SSP1	2045	1.02245	1.02464	1.02355
China	SSP1	2050	1.05805	1.06069	1.05937
China	SSP1	2055	1.08672	1.08977	1.08825
China	SSP1	2060	1.11534	1.11878	1.11706
China	SSP1	2065	1.14574	1.14951	1.14762
China	SSP1	2070	1.17322	1.17725	1.17523
China	SSP1	2075	1.19704	1.20123	1.19914
China	SSP1	2080	1.21897	1.22325	1.22111
China	SSP1	2085	1.23927	1.24357	1.24142
China	SSP1	2090	1.25896	1.26323	1.26109
China	SSP1	2095	1.27881	1.28298	1.28089
China	SSP1	2100	1.29787	1.3019	1.29988
China	SSP2	2020	0.7948	0.7948	0.7948
China	SSP2	2025	0.852317	0.852689	0.852503
China	SSP2	2030	0.897607	0.898392	0.898
China	SSP2	2035	0.934836	0.936038	0.935437
China	SSP2	2040	0.960861	0.962427	0.961644
China	SSP2	2045	0.98332	0.985258	0.984289
China	SSP2	2050	1.00159	1.00391	1.00275
China	SSP2	2055	1.01464	1.01732	1.01598
China	SSP2	2060	1.02888	1.03193	1.0304
China	SSP2	2065	1.04636	1.04977	1.04806
China	SSP2	2070	1.06383	1.06754	1.06569
China	SSP2	2075	1.08053	1.08446	1.0825
China	SSP2	2080	1.09752	1.10164	1.09958
China	SSP2	2085	1.11627	1.1205	1.11839
China	SSP2	2090	1.13849	1.14279	1.14064
China	SSP2	2095	1.16403	1.16833	1.16618
China	SSP2	2100	1.19093	1.19517	1.19305
China	SSP3	2020	0.7948	0.7948	0.7948
China	SSP3	2025	0.85358	0.853948	0.853764
China	SSP3	2030	0.899926	0.900696	0.900311
China	SSP3	2035	0.932614	0.933734	0.933174
China	SSP3	2040	0.947788	0.949148	0.948468
China	SSP3	2045	0.95191	0.953472	0.952691
China	SSP3	2050	0.94711	0.948864	0.947987
China	SSP3	2055	0.934125	0.936058	0.935091
China	SSP3	2060	0.918871	0.920981	0.919926
China	SSP3	2065	0.903144	0.905418	0.904281
China	SSP3	2070	0.885317	0.887714	0.886515
China	SSP3	2075	0.865604	0.868089	0.866846
China	SSP3	2080	0.845654	0.84821	0.846932
China	SSP3	2085	0.827621	0.830241	0.828931
China	SSP3	2090	0.812732	0.81541	0.814071
China	SSP3	2095	0.800358	0.803086	0.801722
China	SSP3	2100	0.789537	0.792305	0.790921
China	SSP4	2020	0.7948	0.7948	0.7948
China	SSP4	2025	0.850914	0.851289	0.851102
China	SSP4	2030	0.894438	0.895235	0.894836
China	SSP4	2035	0.930584	0.931826	0.931205
China	SSP4	2040	0.955371	0.95702	0.956196
China	SSP4	2045	0.976768	0.978837	0.977803
China	SSP4	2050	0.992424	0.994902	0.993663
China	SSP4	2055	1.00082	1.00368	1.00225
China	SSP4	2060	1.00898	1.01221	1.01059
China	SSP4	2065	1.01923	1.0228	1.02101
China	SSP4	2070	1.02799	1.03182	1.0299
China	SSP4	2075	1.03424	1.03828	1.03626
China	SSP4	2080	1.03938	1.04356	1.04147
China	SSP4	2085	1.04476	1.04903	1.0469
China	SSP4	2090	1.05197	1.05627	1.05412
China	SSP4	2095	1.06097	1.06526	1.06312
China	SSP4	2100	1.07031	1.07454	1.07243
China	SSP5	2020	0.7948	0.7948	0.7948
China	SSP5	2025	0.851705	0.852078	0.851891
China	SSP5	2030	0.898474	0.899275	0.898875
China	SSP5	2035	0.951538	0.952882	0.95221
China	SSP5	2040	1.0091	1.01104	1.01007
China	SSP5	2045	1.07407	1.07665	1.07536
China	SSP5	2050	1.13671	1.13988	1.13829
China	SSP5	2055	1.19598	1.19964	1.19781
China	SSP5	2060	1.26167	1.26572	1.2637
China	SSP5	2065	1.337	1.34128	1.33914
China	SSP5	2070	1.4161	1.42038	1.41824
China	SSP5	2075	1.49742	1.50144	1.49943
China	SSP5	2080	1.58315	1.58666	1.5849
China	SSP5	2085	1.67421	1.67689	1.67555
China	SSP5	2090	1.77191	1.77342	1.77267
China	SSP5	2095	1.87646	1.87649	1.87647
China	SSP5	2100	1.98426	1.98617	1.98522
Former Soviet Union	Historical	2003	0.392546	0.392546	0.392546
Former Soviet Union	Historical	2004	0.485496	0.485496	0.485496
Former Soviet Union	Historical	2005	0.51067	0.51067	0.51067
Former Soviet Union	Historical	2008	0.506073	0.506073	0.506073
Former Soviet Union	Historical	2010	0.504724	0.504724	0.504724
Former Soviet Union	Historical	2012	0.657892	0.657892	0.657892
Former Soviet Union	Historical	2014	0.645642	0.645642	0.645642
Former Soviet Union	Historical	2016	0.671589	0.671589	0.671589
Former Soviet Union	Historical	2018	0.732274	0.732274	0.732274
Former Soviet Union	Historical	2020	0.778971	0.778971	0.778971
Former Soviet Union	SSP1	2020	0.778971	0.778971	0.778971
Former Soviet Union	SSP1	2025	0.802364	0.802516	0.80244
Former Soviet Union	SSP1	2030	0.829555	0.829891	0.829723
Former Soviet Union	SSP1	2035	0.868736	0.869359	0.869048
Former Soviet Union	SSP1	2040	0.913473	0.914435	0.913954
Former Soviet Union	SSP1	2045	0.961256	0.96258	0.961918
Former Soviet Union	SSP1	2050	1.00877	1.01045	1.00961
Former Soviet Union	SSP1	2055	1.05941	1.06144	1.06043
Former Soviet Union	SSP1	2060	1.1164	1.1188	1.1176
Former Soviet Union	SSP1	2065	1.17869	1.18145	1.18007
Former Soviet Union	SSP1	2070	1.24484	1.24791	1.24637
Former Soviet Union	SSP1	2075	1.31331	1.31664	1.31497
Former Soviet Union	SSP1	2080	1.3844	1.38793	1.38617
Former Soviet Union	SSP1	2085	1.45955	1.46319	1.46137
Former Soviet Union	SSP1	2090	1.54	1.54366	1.54183
Former Soviet Union	SSP1	2095	1.62582	1.62938	1.6276
Former Soviet Union	SSP1	2100	1.71641	1.71974	1.71807
Former Soviet Union	SSP2	2020	0.778971	0.778971	0.778971
Former Soviet Union	SSP2	2025	0.80221	0.802362	0.802286
Former Soviet Union	SSP2	2030	0.828682	0.829014	0.828848
Former Soviet Union	SSP2	2035	0.862819	0.863405	0.863112
Former Soviet Union	SSP2	2040	0.897756	0.898607	0.898182
Former Soviet Union	SSP2	2045	0.932458	0.933572	0.933015
Former Soviet Union	SSP2	2050	0.967486	0.968862	0.968174
Former Soviet Union	SSP2	2055	1.00645	1.00811	1.00728
Former Soviet Union	SSP2	2060	1.05178	1.05376	1.05277
Former Soviet Union	SSP2	2065	1.10193	1.10423	1.10308
Former Soviet Union	SSP2	2070	1.15566	1.15827	1.15696
Former Soviet Union	SSP2	2075	1.21157	1.21447	1.21302
Former Soviet Union	SSP2	2080	1.26999	1.27314	1.27157
Former Soviet Union	SSP2	2085	1.3325	1.33586	1.33418
Former Soviet Union	SSP2	2090	1.40049	1.40401	1.40225
Former Soviet Union	SSP2	2095	1.47425	1.47786	1.47605
Former Soviet Union	SSP2	2100	1.55332	1.55693	1.55512
Former Soviet Union	SSP3	2020	0.778971	0.778971	0.778971
Former Soviet Union	SSP3	2025	0.801783	0.801935	0.801859
Former Soviet Union	SSP3	2030	0.827489	0.82782	0.827654
Former Soviet Union	SSP3	2035	0.856379	0.85693	0.856655
Former Soviet Union	SSP3	2040	0.879038	0.879766	0.879402
Former Soviet Union	SSP3	2045	0.894706	0.895556	0.895131
Former Soviet Union	SSP3	2050	0.9061	0.907035	0.906567
Former Soviet Union	SSP3	2055	0.91764	0.918661	0.918151
Former Soviet Union	SSP3	2060	0.931163	0.932283	0.931723
Former Soviet Union	SSP3	2065	0.945725	0.94695	0.946337
Former Soviet Union	SSP3	2070	0.959834	0.961157	0.960496
Former Soviet Union	SSP3	2075	0.972731	0.974141	0.973436
Former Soviet Union	SSP3	2080	0.984993	0.986483	0.985738
Former Soviet Union	SSP3	2085	0.997289	0.998857	0.998073
Former Soviet Union	SSP3	2090	1.01096	1.01261	1.01178
Former Soviet Union	SSP3	2095	1.02557	1.02731	1.02644
Former Soviet Union	SSP3	2100	1.04029	1.04212	1.04121
Former Soviet Union	SSP4	2020	0.778971	0.778971	0.778971
Former Soviet Union	SSP4	2025	0.802207	0.802362	0.802284
Former Soviet Union	SSP4	2030	0.82898	0.829322	0.829151
Former Soviet Union	SSP4	2035	0.864047	0.864656	0.864351
Former Soviet Union	SSP4	2040	0.898991	0.899873	0.899432
Former Soviet Union	SSP4	2045	0.932254	0.93339	0.932822
Former Soviet Union	SSP4	2050	0.964125	0.965495	0.96481
Former Soviet Union	SSP4	2055	0.99832	0.99993	0.999125
Former Soviet Union	SSP4	2060	1.03777	1.03963	1.0387
Former Soviet Union	SSP4	2065	1.08106	1.08319	1.08212
Former Soviet Union	SSP4	2070	1.12728	1.12966	1.12847
Former Soviet Union	SSP4	2075	1.17501	1.17761	1.17631
Former Soviet Union	SSP4	2080	1.22435	1.22714	1.22574
Former Soviet Union	SSP4	2085	1.27655	1.2795	1.27803
Former Soviet Union	SSP4	2090	1.33279	1.33587	1.33433
Former Soviet Union	SSP4	2095	1.39338	1.39654	1.39496
Former Soviet Union	SSP4	2100	1.45819	1.46137	1.45978
Former Soviet Union	SSP5	2020	0.778971	0.778971	0.778971
Former Soviet Union	SSP5	2025	0.802554	0.802701	0.802627
Former Soviet Union	SSP5	2030	0.830043	0.830369	0.830206
Former Soviet Union	SSP5	2035	0.875437	0.876089	0.875763
Former Soviet Union	SSP5	2040	0.935006	0.936102	0.935554
Former Soviet Union	SSP5	2045	1.00369	1.0053	1.00449
Former Soviet Union	SSP5	2050	1.07467	1.07676	1.07572
Former Soviet Union	SSP5	2055	1.15253	1.1551	1.15382
Former Soviet Union	SSP5	2060	1.24259	1.24562	1.2441
Former Soviet Union	SSP5	2065	1.34494	1.34834	1.34664
Former Soviet Union	SSP5	2070	1.459	1.46262	1.46081
Former Soviet Union	SSP5	2075	1.58385	1.58748	1.58567
Former Soviet Union	SSP5	2080	1.7207	1.72404	1.72237
Former Soviet Union	SSP5	2085	1.87223	1.8749	1.87357
Former Soviet Union	SSP5	2090	2.04123	2.0427	2.04196
Former Soviet Union	SSP5	2095	2.22872	2.22913	2.22892
Former Soviet Union	SSP5	2100	2.43344	2.43657	2.435
Latin America and the Caribbean	Historical	2003	0.54004	0.54004	0.54004
Latin America and the Caribbean	Historical	2004	0.571862	0.571862	0.571862
Latin America and the Caribbean	Historical	2005	0.590184	0.590184	0.590184
Latin America and the Caribbean	Historical	2008	0.570931	0.570931	0.570931
Latin America and the Caribbean	Historical	2010	0.521627	0.521627	0.521627
Latin America and the Caribbean	Historical	2012	0.62306	0.62306	0.62306
Latin America and the Caribbean	Historical	2014	0.597931	0.597931	0.597931
Latin America and the Caribbean	Historical	2016	0.637022	0.637022	0.637022
Latin America and the Caribbean	Historical	2018	0.712638	0.712638	0.712638
Latin America and the Caribbean	Historical	2020	0.756815	0.756815	0.756815
Latin America and the Caribbean	SSP1	2020	0.756815	0.756815	0.756815
Latin America and the Caribbean	SSP1	2025	0.786928	0.78708	0.787004
Latin America and the Caribbean	SSP1	2030	0.809186	0.809468	0.809327
Latin America and the Caribbean	SSP1	2035	0.842274	0.842779	0.842526
Latin America and the Caribbean	SSP1	2040	0.885993	0.886827	0.88641
Latin America and the Caribbean	SSP1	2045	0.939633	0.940897	0.940265
Latin America and the Caribbean	SSP1	2050	0.999401	1.00115	1.00028
Latin America and the Caribbean	SSP1	2055	1.06388	1.06614	1.06501
Latin America and the Caribbean	SSP1	2060	1.13266	1.13543	1.13405
Latin America and the Caribbean	SSP1	2065	1.20613	1.20938	1.20775
Latin America and the Caribbean	SSP1	2070	1.28264	1.2863	1.28447
Latin America and the Caribbean	SSP1	2075	1.36112	1.36511	1.36311
Latin America and the Caribbean	SSP1	2080	1.43973	1.44395	1.44184
Latin America and the Caribbean	SSP1	2085	1.51789	1.52221	1.52005
Latin America and the Caribbean	SSP1	2090	1.59525	1.59956	1.5974
Latin America and the Caribbean	SSP1	2095	1.67133	1.6755	1.67341
Latin America and the Caribbean	SSP1	2100	1.74578	1.7497	1.74774
Latin America and the Caribbean	SSP2	2020	0.756815	0.756815	0.756815
Latin America and the Caribbean	SSP2	2025	0.786631	0.786779	0.786705
Latin America and the Caribbean	SSP2	2030	0.807929	0.808196	0.808063
Latin America and the Caribbean	SSP2	2035	0.836805	0.837256	0.837031
Latin America and the Caribbean	SSP2	2040	0.871886	0.872588	0.872237
Latin America and the Caribbean	SSP2	2045	0.912952	0.913971	0.913461
Latin America and the Caribbean	SSP2	2050	0.95932	0.960714	0.960017
Latin America and the Caribbean	SSP2	2055	1.01047	1.01228	1.01137
Latin America and the Caribbean	SSP2	2060	1.06561	1.06785	1.06673
Latin America and the Caribbean	SSP2	2065	1.12531	1.128	1.12666
Latin America and the Caribbean	SSP2	2070	1.18883	1.19194	1.19038
Latin America and the Caribbean	SSP2	2075	1.25596	1.25946	1.25771
Latin America and the Caribbean	SSP2	2080	1.32581	1.32963	1.32772
Latin America and the Caribbean	SSP2	2085	1.39829	1.40236	1.40033
Latin America and the Caribbean	SSP2	2090	1.47326	1.47749	1.47538
Latin America and the Caribbean	SSP2	2095	1.55035	1.55462	1.55249
Latin America and the Caribbean	SSP2	2100	1.62932	1.63351	1.63141
Latin America and the Caribbean	SSP3	2020	0.756815	0.756815	0.756815
Latin America and the Caribbean	SSP3	2025	0.78629	0.786434	0.786362
Latin America and the Caribbean	SSP3	2030	0.806594	0.806846	0.80672
Latin America and the Caribbean	SSP3	2035	0.830674	0.831066	0.83087
Latin America and the Caribbean	SSP3	2040	0.855506	0.856057	0.855782
Latin America and the Caribbean	SSP3	2045	0.879878	0.8806	0.880239
Latin America and the Caribbean	SSP3	2050	0.903861	0.904761	0.904311
Latin America and the Caribbean	SSP3	2055	0.927026	0.928105	0.927566
Latin America and the Caribbean	SSP3	2060	0.948013	0.949257	0.948635
Latin America and the Caribbean	SSP3	2065	0.967324	0.968721	0.968022
Latin America and the Caribbean	SSP3	2070	0.984893	0.986431	0.985662
Latin America and the Caribbean	SSP3	2075	1.0011	1.00277	1.00194
Latin America and the Caribbean	SSP3	2080	1.01588	1.01766	1.01677
Latin America and the Caribbean	SSP3	2085	1.02953	1.03142	1.03048
Latin America and the Caribbean	SSP3	2090	1.04229	1.04427	1.04328
Latin America and the Caribbean	SSP3	2095	1.05433	1.05638	1.05535
Latin America and the Caribbean	SSP3	2100	1.06595	1.06807	1.06701
Latin America and the Caribbean	SSP4	2020	0.756815	0.756815	0.756815
Latin America and the Caribbean	SSP4	2025	0.786348	0.786492	0.78642
Latin America and the Caribbean	SSP4	2030	0.807094	0.807349	0.807221
Latin America and the Caribbean	SSP4	2035	0.835862	0.836292	0.836077
Latin America and the Caribbean	SSP4	2040	0.872354	0.873035	0.872694
Latin America and the Caribbean	SSP4	2045	0.917114	0.918133	0.917624
Latin America and the Caribbean	SSP4	2050	0.968459	0.969885	0.969172
Latin America and the Caribbean	SSP4	2055	1.02536	1.02724	1.0263
Latin America and the Caribbean	SSP4	2060	1.08608	1.08842	1.08725
Latin America and the Caribbean	SSP4	2065	1.15113	1.15393	1.15253
Latin America and the Caribbean	SSP4	2070	1.22004	1.22326	1.22165
Latin America and the Caribbean	SSP4	2075	1.2929	1.29651	1.2947
Latin America and the Caribbean	SSP4	2080	1.36897	1.37288	1.37092
Latin America and the Caribbean	SSP4	2085	1.44803	1.45216	1.4501
Latin America and the Caribbean	SSP4	2090	1.52975	1.53399	1.53187
Latin America and the Caribbean	SSP4	2095	1.61377	1.61799	1.61588
Latin America and the Caribbean	SSP4	2100	1.70035	1.70442	1.70238
Latin America and the Caribbean	SSP5	2020	0.756815	0.756815	0.756815
Latin America and the Caribbean	SSP5	2025	0.787132	0.787287	0.78721
Latin America and the Caribbean	SSP5	2030	0.810134	0.810425	0.81028
Latin America and the Caribbean	SSP5	2035	0.848858	0.849416	0.849137
Latin America and the Caribbean	SSP5	2040	0.905914	0.906911	0.906412
Latin America and the Caribbean	SSP5	2045	0.980201	0.981797	0.980999
Latin America and the Caribbean	SSP5	2050	1.06496	1.06722	1.06609
Latin America and the Caribbean	SSP5	2055	1.15951	1.16244	1.16097
Latin America and the Caribbean	SSP5	2060	1.26477	1.26832	1.26655
Latin America and the Caribbean	SSP5	2065	1.38242	1.38647	1.38445
Latin America and the Caribbean	SSP5	2070	1.51118	1.51551	1.51335
Latin America and the Caribbean	SSP5	2075	1.6503	1.65462	1.65246
Latin America and the Caribbean	SSP5	2080	1.79784	1.80178	1.79981
Latin America and the Caribbean	SSP5	2085	1.95345	1.95658	1.95502
Latin America and the Caribbean	SSP5	2090	2.11715	2.11895	2.11805
Latin America and the Caribbean	SSP5	2095	2.2886	2.28868	2.28864
Latin America and the Caribbean	SSP5	2100	2.46533	2.46795	2.46664
Middle East and North Africa	Historical	2003	0.300391	0.300391	0.300391
Middle East and North Africa	Historical	2004	0.312717	0.312717	0.312717
Middle East and North Africa	Historical	2005	0.39008	0.39008	0.39008
Middle East and North Africa	Historical	2008	0.450374	0.450374	0.450374
Middle East and North Africa	Historical	2010	0.450405	0.450405	0.450405
Middle East and North Africa	Historical	2012	0.488067	0.488067	0.488067
Middle East and North Africa	Historical	2014	0.501744	0.501744	0.501744
Middle East and North Africa	Historical	2016	0.481429	0.481429	0.481429
Middle East and North Africa	Historical	2018	0.557985	0.557985	0.557985
Middle East and North Africa	Historical	2020	0.613458	0.613458	0.613458
Middle East and North Africa	SSP1	2020	0.613458	0.613458	0.613458
Middle East and North Africa	SSP1	2025	0.642037	0.642145	0.642091
Middle East and North Africa	SSP1	2030	0.676975	0.677246	0.677111
Middle East and North Africa	SSP1	2035	0.723557	0.724109	0.723833
Middle East and North Africa	SSP1	2040	0.780286	0.781231	0.780758
Middle East and North Africa	SSP1	2045	0.846853	0.848278	0.847566
Middle East and North Africa	SSP1	2050	0.919262	0.921189	0.920226
Middle East and North Africa	SSP1	2055	0.997784	1.0002	0.99899
Middle East and North Africa	SSP1	2060	1.08422	1.08706	1.08564
Middle East and North Africa	SSP1	2065	1.17812	1.18131	1.17971
Middle East and North Africa	SSP1	2070	1.27503	1.2784	1.27672
Middle East and North Africa	SSP1	2075	1.37512	1.3785	1.37681
Middle East and North Africa	SSP1	2080	1.47854	1.48175	1.48014
Middle East and North Africa	SSP1	2085	1.58613	1.58893	1.58753
Middle East and North Africa	SSP1	2090	1.69845	1.70059	1.69952
Middle East and North Africa	SSP1	2095	1.81586	1.81706	1.81646
Middle East and North Africa	SSP1	2100	1.93754	1.93761	1.93758
Middle East and North Africa	SSP2	2020	0.613458	0.613458	0.613458
Middle East and North Africa	SSP2	2025	0.641702	0.641807	0.641755
Middle East and North Africa	SSP2	2030	0.675557	0.675814	0.675686
Middle East and North Africa	SSP2	2035	0.715977	0.716462	0.71622
Middle East and North Africa	SSP2	2040	0.75928	0.76004	0.75966
Middle East and North Africa	SSP2	2045	0.806525	0.807606	0.807065
Middle East and North Africa	SSP2	2050	0.858649	0.860095	0.859372
Middle East and North Africa	SSP2	2055	0.917243	0.91909	0.918167
Middle East and North Africa	SSP2	2060	0.983215	0.985483	0.984349
Middle East and North Africa	SSP2	2065	1.05637	1.05905	1.05771
Middle East and North Africa	SSP2	2070	1.13378	1.13682	1.1353
Middle East and North Africa	SSP2	2075	1.21575	1.21907	1.21741
Middle East and North Africa	SSP2	2080	1.30198	1.30548	1.30373
Middle East and North Africa	SSP2	2085	1.39269	1.39624	1.39447
Middle East and North Africa	SSP2	2090	1.48813	1.49157	1.48985
Middle East and North Africa	SSP2	2095	1.5891	1.59224	1.59067
Middle East and North Africa	SSP2	2100	1.69555	1.69817	1.69686
Middle East and North Africa	SSP3	2020	0.613458	0.613458	0.613458
Middle East and North Africa	SSP3	2025	0.641384	0.641486	0.641435
Middle East and North Africa	SSP3	2030	0.674246	0.67449	0.674368
Middle East and North Africa	SSP3	2035	0.70867	0.709093	0.708881
Middle East and North Africa	SSP3	2040	0.737896	0.738475	0.738186
Middle East and North Africa	SSP3	2045	0.762667	0.763378	0.763022
Middle East and North Africa	SSP3	2050	0.785791	0.786627	0.786209
Middle East and North Africa	SSP3	2055	0.809092	0.810058	0.809575
Middle East and North Africa	SSP3	2060	0.832414	0.833512	0.832963
Middle East and North Africa	SSP3	2065	0.855328	0.856559	0.855944
Middle East and North Africa	SSP3	2070	0.876249	0.8776	0.876925
Middle East and North Africa	SSP3	2075	0.895664	0.897125	0.896394
Middle East and North Africa	SSP3	2080	0.913328	0.914885	0.914107
Middle East and North Africa	SSP3	2085	0.929343	0.930985	0.930164
Middle East and North Africa	SSP3	2090	0.944042	0.945758	0.9449
Middle East and North Africa	SSP3	2095	0.957826	0.959612	0.958719
Middle East and North Africa	SSP3	2100	0.970645	0.972496	0.97157
Middle East and North Africa	SSP4	2020	0.613458	0.613458	0.613458
Middle East and North Africa	SSP4	2025	0.641639	0.641744	0.641692
Middle East and North Africa	SSP4	2030	0.675314	0.675567	0.67544
Middle East and North Africa	SSP4	2035	0.71345	0.713905	0.713677
Middle East and North Africa	SSP4	2040	0.749866	0.750526	0.750196
Middle East and North Africa	SSP4	2045	0.784751	0.785613	0.785182
Middle East and North Africa	SSP4	2050	0.820579	0.821657	0.821118
Middle East and North Africa	SSP4	2055	0.85957	0.860891	0.860231
Middle East and North Africa	SSP4	2060	0.902175	0.903762	0.902969
Middle East and North Africa	SSP4	2065	0.948445	0.950318	0.949382
Middle East and North Africa	SSP4	2070	0.996799	0.998959	0.997879
Middle East and North Africa	SSP4	2075	1.04792	1.05037	1.04914
Middle East and North Africa	SSP4	2080	1.10157	1.10429	1.10293
Middle East and North Africa	SSP4	2085	1.15786	1.16085	1.15936
Middle East and North Africa	SSP4	2090	1.21719	1.22041	1.2188
Middle East and North Africa	SSP4	2095	1.28035	1.28378	1.28207
Middle East and North Africa	SSP4	2100	1.34757	1.35116	1.34936
Middle East and North Africa	SSP5	2020	0.613458	0.613458	0.613458
Middle East and North Africa	SSP5	2025	0.641857	0.641964	0.64191
Middle East and North Africa	SSP5	2030	0.677068	0.677339	0.677203
Middle East and North Africa	SSP5	2035	0.730393	0.730994	0.730693
Middle East and North Africa	SSP5	2040	0.804103	0.805229	0.804666
Middle East and North Africa	SSP5	2045	0.895646	0.897427	0.896536
Middle East and North Africa	SSP5	2050	0.996368	0.998787	0.997578
Middle East and North Africa	SSP5	2055	1.10766	1.11062	1.10914
Middle East and North Africa	SSP5	2060	1.23388	1.2372	1.23554
Middle East and North Africa	SSP5	2065	1.37658	1.37999	1.37828
Middle East and North Africa	SSP5	2070	1.53165	1.53472	1.53318
Middle East and North Africa	SSP5	2075	1.70055	1.70274	1.70164
Middle East and North Africa	SSP5	2080	1.88467	1.88531	1.88499
Middle East and North Africa	SSP5	2085	2.08467	2.08645	2.08556
Middle East and North Africa	SSP5	2090	2.3029	2.30817	2.30553
Middle East and North Africa	SSP5	2095	2.54197	2.55206	2.54701
Middle East and North Africa	SSP5	2100	2.80227	2.81881	2.81054
North America	Historical	2003	0.915197	0.915197	0.915197
North America	Historical	2004	0.905711	0.905711	0.905711
North America	Historical	2005	0.899925	0.899925	0.899925
North America	Historical	2008	0.859748	0.859748	0.859748
North America	Historical	2010	0.850412	0.850412	0.850412
North America	Historical	2012	0.866167	0.866167	0.866167
North America	Historical	2014	0.871519	0.871519	0.871519
North America	Historical	2016	0.840649	0.840649	0.840649
North America	Historical	2018	0.871695	0.871695	0.871695
North America	Historical	2020	0.92068	0.92068	0.92068
North America	SSP1	2020	0.92068	0.92068	0.92068
North America	SSP1	2025	1.00616	1.00651	1.00634
North America	SSP1	2030	1.07073	1.07128	1.071
North America	SSP1	2035	1.13897	1.13967	1.13932
North America	SSP1	2040	1.21088	1.21167	1.21127
North America	SSP1	2045	1.28175	1.28257	1.28216
North America	SSP1	2050	1.34598	1.34676	1.34637
North America	SSP1	2055	1.40754	1.40823	1.40789
North America	SSP1	2060	1.4687	1.46924	1.46897
North America	SSP1	2065	1.53085	1.53119	1.53102
North America	SSP1	2070	1.59192	1.59199	1.59196
North America	SSP1	2075	1.65153	1.65178	1.65165
North America	SSP1	2080	1.71069	1.7113	1.71099
North America	SSP1	2085	1.77051	1.77156	1.77104
North America	SSP1	2090	1.83156	1.83314	1.83235
North America	SSP1	2095	1.89339	1.89557	1.89448
North America	SSP1	2100	1.95484	1.9577	1.95627
North America	SSP2	2020	0.92068	0.92068	0.92068
North America	SSP2	2025	1.00626	1.00661	1.00643
North America	SSP2	2030	1.06904	1.06958	1.06931
North America	SSP2	2035	1.12392	1.12459	1.12426
North America	SSP2	2040	1.17488	1.17563	1.17525
North America	SSP2	2045	1.22402	1.22482	1.22442
North America	SSP2	2050	1.27178	1.27261	1.2722
North America	SSP2	2055	1.32085	1.32167	1.32126
North America	SSP2	2060	1.37072	1.37149	1.37111
North America	SSP2	2065	1.42157	1.42226	1.42192
North America	SSP2	2070	1.47127	1.47184	1.47156
North America	SSP2	2075	1.52011	1.52054	1.52033
North America	SSP2	2080	1.56916	1.5694	1.56928
North America	SSP2	2085	1.61948	1.61948	1.61948
North America	SSP2	2090	1.67114	1.67143	1.67128
North America	SSP2	2095	1.72396	1.72459	1.72428
North America	SSP2	2100	1.77713	1.77816	1.77764
North America	SSP3	2020	0.92068	0.92068	0.92068
North America	SSP3	2025	1.00859	1.00895	1.00877
North America	SSP3	2030	1.07138	1.07193	1.07165
North America	SSP3	2035	1.11265	1.1133	1.11298
North America	SSP3	2040	1.1407	1.1414	1.14105
North America	SSP3	2045	1.16371	1.16445	1.16408
North America	SSP3	2050	1.18569	1.18646	1.18607
North America	SSP3	2055	1.20861	1.20941	1.20901
North America	SSP3	2060	1.22949	1.2303	1.22989
North America	SSP3	2065	1.24803	1.24885	1.24844
North America	SSP3	2070	1.2631	1.26393	1.26351
North America	SSP3	2075	1.27639	1.27722	1.27681
North America	SSP3	2080	1.28946	1.2903	1.28988
North America	SSP3	2085	1.30319	1.30403	1.30361
North America	SSP3	2090	1.31751	1.31834	1.31793
North America	SSP3	2095	1.33196	1.33279	1.33237
North America	SSP3	2100	1.34635	1.34718	1.34676
North America	SSP4	2020	0.92068	0.92068	0.92068
North America	SSP4	2025	1.00749	1.00785	1.00767
North America	SSP4	2030	1.07506	1.07562	1.07534
North America	SSP4	2035	1.14607	1.14678	1.14643
North America	SSP4	2040	1.21774	1.21854	1.21814
North America	SSP4	2045	1.28374	1.28455	1.28415
North America	SSP4	2050	1.33952	1.34029	1.33991
North America	SSP4	2055	1.38963	1.39033	1.38998
North America	SSP4	2060	1.43756	1.43814	1.43785
North America	SSP4	2065	1.48504	1.48547	1.48526
North America	SSP4	2070	1.53055	1.53079	1.53067
North America	SSP4	2075	1.57407	1.57409	1.57408
North America	SSP4	2080	1.61638	1.61661	1.61649
North America	SSP4	2085	1.65854	1.65906	1.6588
North America	SSP4	2090	1.70106	1.70191	1.70149
North America	SSP4	2095	1.74378	1.74502	1.7444
North America	SSP4	2100	1.78605	1.78772	1.78688
North America	SSP5	2020	0.92068	0.92068	0.92068
North America	SSP5	2025	1.00043	1.00074	1.00058
North America	SSP5	2030	1.06001	1.06051	1.06026
North America	SSP5	2035	1.13747	1.13814	1.13781
North America	SSP5	2040	1.23353	1.23433	1.23393
North America	SSP5	2045	1.33863	1.33942	1.33902
North America	SSP5	2050	1.44155	1.4422	1.44188
North America	SSP5	2055	1.54844	1.54877	1.54861
North America	SSP5	2060	1.66323	1.66342	1.66332
North America	SSP5	2065	1.78765	1.78864	1.78814
North America	SSP5	2070	1.9195	1.92159	1.92055
North America	SSP5	2075	2.05836	2.0619	2.06013
North America	SSP5	2080	2.20533	2.21074	2.20803
North America	SSP5	2085	2.36201	2.3698	2.36591
North America	SSP5	2090	2.52968	2.54046	2.53507
North America	SSP5	2095	2.70826	2.72273	2.71549
North America	SSP5	2100	2.8968	2.91576	2.90628
Other Pacific Asia	Historical	2003	0.578621	0.578621	0.578621
Other Pacific Asia	Historical	2004	0.663348	0.663348	0.663348
Other Pacific Asia	Historical	2005	0.693287	0.693287	0.693287
Other Pacific Asia	Historical	2008	0.64397	0.64397	0.64397
Other Pacific Asia	Historical	2010	0.643575	0.643575	0.643575
Other Pacific Asia	Historical	2012	0.692416	0.692416	0.692416
Other Pacific Asia	Historical	2014	0.676666	0.676666	0.676666
Other Pacific Asia	Historical	2016	0.703126	0.703126	0.703126
Other Pacific Asia	Historical	2018	0.763418	0.763418	0.763418
Other Pacific Asia	Historical	2020	0.843653	0.843653	0.843653
Other Pacific Asia	SSP1	2020	0.843653	0.843653	0.843653
Other Pacific Asia	SSP1	2025	0.894172	0.894434	0.894303
Other Pacific Asia	SSP1	2030	0.946299	0.94683	0.946565
Other Pacific Asia	SSP1	2035	0.99997	1.00077	1.00037
Other Pacific Asia	SSP1	2040	1.05385	1.05495	1.0544
Other Pacific Asia	SSP1	2045	1.10696	1.10835	1.10765
Other Pacific Asia	SSP1	2050	1.15611	1.15779	1.15695
Other Pacific Asia	SSP1	2055	1.20274	1.20467	1.2037
Other Pacific Asia	SSP1	2060	1.24886	1.25102	1.24994
Other Pacific Asia	SSP1	2065	1.29583	1.29818	1.29701
Other Pacific Asia	SSP1	2070	1.341	1.34351	1.34225
Other Pacific Asia	SSP1	2075	1.38414	1.3868	1.38547
Other Pacific Asia	SSP1	2080	1.42459	1.42736	1.42598
Other Pacific Asia	SSP1	2085	1.46297	1.46583	1.4644
Other Pacific Asia	SSP1	2090	1.50025	1.50317	1.50171
Other Pacific Asia	SSP1	2095	1.53714	1.5401	1.53862
Other Pacific Asia	SSP1	2100	1.57515	1.57811	1.57663
Other Pacific Asia	SSP2	2020	0.843653	0.843653	0.843653
Other Pacific Asia	SSP2	2025	0.894109	0.89437	0.894239
Other Pacific Asia	SSP2	2030	0.945381	0.945903	0.945642
Other Pacific Asia	SSP2	2035	0.992153	0.992905	0.992529
Other Pacific Asia	SSP2	2040	1.03398	1.03495	1.03447
Other Pacific Asia	SSP2	2045	1.07366	1.07485	1.07425
Other Pacific Asia	SSP2	2050	1.11236	1.1138	1.11308
Other Pacific Asia	SSP2	2055	1.15129	1.15295	1.15212
Other Pacific Asia	SSP2	2060	1.19106	1.19294	1.192
Other Pacific Asia	SSP2	2065	1.23244	1.23452	1.23348
Other Pacific Asia	SSP2	2070	1.27275	1.275	1.27387
Other Pacific Asia	SSP2	2075	1.31192	1.31433	1.31313
Other Pacific Asia	SSP2	2080	1.34961	1.35217	1.35089
Other Pacific Asia	SSP2	2085	1.3865	1.38918	1.38784
Other Pacific Asia	SSP2	2090	1.42345	1.42624	1.42484
Other Pacific Asia	SSP2	2095	1.46093	1.4638	1.46236
Other Pacific Asia	SSP2	2100	1.49875	1.50167	1.50021
Other Pacific Asia	SSP3	2020	0.843653	0.843653	0.843653
Other Pacific Asia	SSP3	2025	0.894328	0.894585	0.894456
Other Pacific Asia	SSP3	2030	0.944625	0.945129	0.944877
Other Pacific Asia	SSP3	2035	0.981707	0.982374	0.98204
Other Pacific Asia	SSP3	2040	1.00576	1.00654	1.00615
Other Pacific Asia	SSP3	2045	1.02201	1.02288	1.02245
Other Pacific Asia	SSP3	2050	1.03482	1.03578	1.0353
Other Pacific Asia	SSP3	2055	1.04624	1.04727	1.04675
Other Pacific Asia	SSP3	2060	1.05618	1.05728	1.05673
Other Pacific Asia	SSP3	2065	1.06511	1.06627	1.06569
Other Pacific Asia	SSP3	2070	1.07095	1.07216	1.07155
Other Pacific Asia	SSP3	2075	1.07422	1.07546	1.07484
Other Pacific Asia	SSP3	2080	1.07526	1.07653	1.0759
Other Pacific Asia	SSP3	2085	1.07479	1.07608	1.07544
Other Pacific Asia	SSP3	2090	1.07344	1.07475	1.0741
Other Pacific Asia	SSP3	2095	1.07135	1.07268	1.07202
Other Pacific Asia	SSP3	2100	1.06821	1.06954	1.06888
Other Pacific Asia	SSP4	2020	0.843653	0.843653	0.843653
Other Pacific Asia	SSP4	2025	0.894084	0.894344	0.894214
Other Pacific Asia	SSP4	2030	0.945924	0.946443	0.946184
Other Pacific Asia	SSP4	2035	0.996678	0.997437	0.997058
Other Pacific Asia	SSP4	2040	1.04487	1.04586	1.04536
Other Pacific Asia	SSP4	2045	1.09105	1.09229	1.09167
Other Pacific Asia	SSP4	2050	1.13346	1.13494	1.1342
Other Pacific Asia	SSP4	2055	1.17324	1.17494	1.17409
Other Pacific Asia	SSP4	2060	1.21155	1.21344	1.2125
Other Pacific Asia	SSP4	2065	1.24965	1.25172	1.25068
Other Pacific Asia	SSP4	2070	1.28554	1.28777	1.28665
Other Pacific Asia	SSP4	2075	1.31979	1.32217	1.32098
Other Pacific Asia	SSP4	2080	1.3524	1.35492	1.35366
Other Pacific Asia	SSP4	2085	1.38413	1.38678	1.38545
Other Pacific Asia	SSP4	2090	1.41581	1.41858	1.4172
Other Pacific Asia	SSP4	2095	1.44813	1.451	1.44956
Other Pacific Asia	SSP4	2100	1.48179	1.48473	1.48326
Other Pacific Asia	SSP5	2020	0.843653	0.843653	0.843653
Other Pacific Asia	SSP5	2025	0.893239	0.893507	0.893373
Other Pacific Asia	SSP5	2030	0.945334	0.945885	0.94561
Other Pacific Asia	SSP5	2035	1.00862	1.00951	1.00906
Other Pacific Asia	SSP5	2040	1.08137	1.08267	1.08202
Other Pacific Asia	SSP5	2045	1.15807	1.15977	1.15892
Other Pacific Asia	SSP5	2050	1.23147	1.2335	1.23249
Other Pacific Asia	SSP5	2055	1.3046	1.30691	1.30575
Other Pacific Asia	SSP5	2060	1.38147	1.38397	1.38272
Other Pacific Asia	SSP5	2065	1.46595	1.46854	1.46724
Other Pacific Asia	SSP5	2070	1.55486	1.55743	1.55614
Other Pacific Asia	SSP5	2075	1.64784	1.65025	1.64905
Other Pacific Asia	SSP5	2080	1.74413	1.74625	1.74519
Other Pacific Asia	SSP5	2085	1.84468	1.84634	1.84551
Other Pacific Asia	SSP5	2090	1.95105	1.95204	1.95155
Other Pacific Asia	SSP5	2095	2.06443	2.06452	2.06448
Other Pacific Asia	SSP5	2100	2.18423	2.18534	2.18478
Pacific OECD	Historical	2003	0.711847	0.711847	0.711847
Pacific OECD	Historical	2004	0.741061	0.741061	0.741061
Pacific OECD	Historical	2005	0.792094	0.792094	0.792094
Pacific OECD	Historical	2008	0.776064	0.776064	0.776064
Pacific OECD	Historical	2010	0.725606	0.725606	0.725606
Pacific OECD	Historical	2012	0.807484	0.807484	0.807484
Pacific OECD	Historical	2014	0.891006	0.891006	0.891006
Pacific OECD	Historical	2016	0.855214	0.855214	0.855214
Pacific OECD	Historical	2018	0.882741	0.882741	0.882741
Pacific OECD	Historical	2020	0.90638	0.90638	0.90638
Pacific OECD	SSP1	2020	0.90638	0.90638	0.90638
Pacific OECD	SSP1	2025	0.954735	0.95509	0.954913
Pacific OECD	SSP1	2030	0.994309	0.994932	0.994621
Pacific OECD	SSP1	2035	1.0494	1.05035	1.04988
Pacific OECD	SSP1	2040	1.1158	1.11708	1.11644
Pacific OECD	SSP1	2045	1.19232	1.19388	1.1931
Pacific OECD	SSP1	2050	1.26946	1.27122	1.27034
Pacific OECD	SSP1	2055	1.34398	1.34583	1.34491
Pacific OECD	SSP1	2060	1.4173	1.41914	1.41822
Pacific OECD	SSP1	2065	1.49176	1.49348	1.49262
Pacific OECD	SSP1	2070	1.56689	1.5684	1.56764
Pacific OECD	SSP1	2075	1.64204	1.64323	1.64263
Pacific OECD	SSP1	2080	1.71641	1.71719	1.7168
Pacific OECD	SSP1	2085	1.78945	1.78973	1.78959
Pacific OECD	SSP1	2090	1.86036	1.86067	1.86052
Pacific OECD	SSP1	2095	1.92886	1.92985	1.92936
Pacific OECD	SSP1	2100	1.99556	1.99729	1.99642
Pacific OECD	SSP2	2020	0.90638	0.90638	0.90638
Pacific OECD	SSP2	2025	0.955308	0.955669	0.955489
Pacific OECD	SSP2	2030	0.994526	0.995153	0.99484
Pacific OECD	SSP2	2035	1.03924	1.04014	1.03969
Pacific OECD	SSP2	2040	1.08459	1.08574	1.08517
Pacific OECD	SSP2	2045	1.13399	1.13536	1.13468
Pacific OECD	SSP2	2050	1.18667	1.18823	1.18745
Pacific OECD	SSP2	2055	1.24039	1.24209	1.24124
Pacific OECD	SSP2	2060	1.29515	1.29694	1.29605
Pacific OECD	SSP2	2065	1.35243	1.35427	1.35335
Pacific OECD	SSP2	2070	1.4115	1.41331	1.41241
Pacific OECD	SSP2	2075	1.47163	1.47335	1.47249
Pacific OECD	SSP2	2080	1.53203	1.5336	1.53281
Pacific OECD	SSP2	2085	1.59253	1.59389	1.59321
Pacific OECD	SSP2	2090	1.65313	1.6542	1.65367
Pacific OECD	SSP2	2095	1.71356	1.71428	1.71392
Pacific OECD	SSP2	2100	1.77303	1.77334	1.77318
Pacific OECD	SSP3	2020	0.90638	0.90638	0.90638
Pacific OECD	SSP3	2025	0.956687	0.957057	0.956872
Pacific OECD	SSP3	2030	0.995785	0.996421	0.996103
Pacific OECD	SSP3	2035	1.02795	1.02879	1.02837
Pacific OECD	SSP3	2040	1.0474	1.04835	1.04788
Pacific OECD	SSP3	2045	1.0594	1.06042	1.05991
Pacific OECD	SSP3	2050	1.0691	1.07018	1.06964
Pacific OECD	SSP3	2055	1.07642	1.07754	1.07698
Pacific OECD	SSP3	2060	1.08094	1.08209	1.08151
Pacific OECD	SSP3	2065	1.08392	1.08508	1.0845
Pacific OECD	SSP3	2070	1.08523	1.0864	1.08581
Pacific OECD	SSP3	2075	1.08542	1.08658	1.086
Pacific OECD	SSP3	2080	1.0851	1.08626	1.08568
Pacific OECD	SSP3	2085	1.08491	1.08607	1.08549
Pacific OECD	SSP3	2090	1.08489	1.08605	1.08547
Pacific OECD	SSP3	2095	1.08459	1.08575	1.08517
Pacific OECD	SSP3	2100	1.08345	1.0846	1.08402
Pacific OECD	SSP4	2020	0.90638	0.90638	0.90638
Pacific OECD	SSP4	2025	0.956199	0.956567	0.956383
Pacific OECD	SSP4	2030	0.998771	0.999427	0.999099
Pacific OECD	SSP4	2035	1.05653	1.05753	1.05703
Pacific OECD	SSP4	2040	1.12339	1.12471	1.12405
Pacific OECD	SSP4	2045	1.19685	1.19844	1.19764
Pacific OECD	SSP4	2050	1.26776	1.26952	1.26864
Pacific OECD	SSP4	2055	1.33324	1.33509	1.33416
Pacific OECD	SSP4	2060	1.39549	1.39734	1.39642
Pacific OECD	SSP4	2065	1.45726	1.45903	1.45814
Pacific OECD	SSP4	2070	1.51828	1.51991	1.5191
Pacific OECD	SSP4	2075	1.57759	1.57903	1.57831
Pacific OECD	SSP4	2080	1.63398	1.63516	1.63457
Pacific OECD	SSP4	2085	1.68704	1.68791	1.68748
Pacific OECD	SSP4	2090	1.73706	1.73759	1.73732
Pacific OECD	SSP4	2095	1.78441	1.78458	1.78449
Pacific OECD	SSP4	2100	1.82886	1.82909	1.82898
Pacific OECD	SSP5	2020	0.90638	0.90638	0.90638
Pacific OECD	SSP5	2025	0.95214	0.952479	0.95231
Pacific OECD	SSP5	2030	0.990217	0.990816	0.990516
Pacific OECD	SSP5	2035	1.05681	1.0578	1.0573
Pacific OECD	SSP5	2040	1.14977	1.1512	1.15048
Pacific OECD	SSP5	2045	1.26262	1.26439	1.2635
Pacific OECD	SSP5	2050	1.37831	1.38022	1.37927
Pacific OECD	SSP5	2055	1.49566	1.49748	1.49657
Pacific OECD	SSP5	2060	1.61853	1.61999	1.61926
Pacific OECD	SSP5	2065	1.75088	1.75166	1.75127
Pacific OECD	SSP5	2070	1.89232	1.89259	1.89245
Pacific OECD	SSP5	2075	2.04139	2.04316	2.04227
Pacific OECD	SSP5	2080	2.19826	2.202	2.20013
Pacific OECD	SSP5	2085	2.3626	2.36886	2.36573
Pacific OECD	SSP5	2090	2.53414	2.54352	2.53883
Pacific OECD	SSP5	2095	2.71278	2.72594	2.71936
Pacific OECD	SSP5	2100	2.89916	2.91683	2.90799
Rest Centrally Planned Asia	Historical	2003	0.35726	0.35726	0.35726
Rest Centrally Planned Asia	Historical	2004	0.33777	0.33777	0.33777
Rest Centrally Planned Asia	Historical	2005	0.36398	0.36398	0.36398
Rest Centrally Planned Asia	Historical	2008	0.4558	0.4558	0.4558
Rest Centrally Planned Asia	Historical	2010	0.44544	0.44544	0.44544
Rest Centrally Planned Asia	Historical	2012	0.52169	0.52169	0.52169
Rest Centrally Planned Asia	Historical	2014	0.47045	0.47045	0.47045
Rest Centrally Planned Asia	Historical	2016	0.51426	0.51426	0.51426
Rest Centrally Planned Asia	Historical	2018	0.5931	0.5931	0.5931
Rest Centrally Planned Asia	Historical	2020	0.6667	0.6667	0.6667
Rest Centrally Planned Asia	SSP1	2020	0.6667	0.6667	0.6667
Rest Centrally Planned Asia	SSP1	2025	0.703457	0.703537	0.703497
Rest Centrally Planned Asia	SSP1	2030	0.763373	0.76376	0.763567
Rest Centrally Planned Asia	SSP1	2035	0.834911	0.835811	0.835361
Rest Centrally Planned Asia	SSP1	2040	0.906032	0.907501	0.906767
Rest Centrally Planned Asia	SSP1	2045	0.97236	0.974365	0.973363
Rest Centrally Planned Asia	SSP1	2050	1.03112	1.03358	1.03235
Rest Centrally Planned Asia	SSP1	2055	1.08605	1.08891	1.08748
Rest Centrally Planned Asia	SSP1	2060	1.1399	1.14313	1.14152
Rest Centrally Planned Asia	SSP1	2065	1.19428	1.19783	1.19605
Rest Centrally Planned Asia	SSP1	2070	1.24915	1.25299	1.25107
Rest Centrally Planned Asia	SSP1	2075	1.30174	1.30583	1.30379
Rest Centrally Planned Asia	SSP1	2080	1.35145	1.35571	1.35358
Rest Centrally Planned Asia	SSP1	2085	1.39915	1.40355	1.40135
Rest Centrally Planned Asia	SSP1	2090	1.44616	1.45066	1.44841
Rest Centrally Planned Asia	SSP1	2095	1.49343	1.49799	1.49571
Rest Centrally Planned Asia	SSP1	2100	1.54135	1.54593	1.54364
Rest Centrally Planned Asia	SSP2	2020	0.6667	0.6667	0.6667
Rest Centrally Planned Asia	SSP2	2025	0.703234	0.703313	0.703273
Rest Centrally Planned Asia	SSP2	2030	0.761775	0.762148	0.761961
Rest Centrally Planned Asia	SSP2	2035	0.825189	0.826005	0.825597
Rest Centrally Planned Asia	SSP2	2040	0.883445	0.884716	0.884081
Rest Centrally Planned Asia	SSP2	2045	0.937698	0.939406	0.938552
Rest Centrally Planned Asia	SSP2	2050	0.989109	0.991225	0.990167
Rest Centrally Planned Asia	SSP2	2055	1.04004	1.04255	1.04129
Rest Centrally Planned Asia	SSP2	2060	1.09113	1.09401	1.09257
Rest Centrally Planned Asia	SSP2	2065	1.14315	1.14637	1.14476
Rest Centrally Planned Asia	SSP2	2070	1.19574	1.19929	1.19752
Rest Centrally Planned Asia	SSP2	2075	1.24682	1.25063	1.24873
Rest Centrally Planned Asia	SSP2	2080	1.29604	1.30008	1.29806
Rest Centrally Planned Asia	SSP2	2085	1.34438	1.34861	1.34649
Rest Centrally Planned Asia	SSP2	2090	1.39315	1.39753	1.39534
Rest Centrally Planned Asia	SSP2	2095	1.44349	1.44797	1.44573
Rest Centrally Planned Asia	SSP2	2100	1.4961	1.50065	1.49838
Rest Centrally Planned Asia	SSP3	2020	0.6667	0.6667	0.6667
Rest Centrally Planned Asia	SSP3	2025	0.703	0.703077	0.703038
Rest Centrally Planned Asia	SSP3	2030	0.75987	0.760226	0.760048
Rest Centrally Planned Asia	SSP3	2035	0.813035	0.813748	0.813391
Rest Centrally Planned Asia	SSP3	2040	0.853193	0.854203	0.853698
Rest Centrally Planned Asia	SSP3	2045	0.884772	0.886025	0.885398
Rest Centrally Planned Asia	SSP3	2050	0.91237	0.913837	0.913104
Rest Centrally Planned Asia	SSP3	2055	0.938322	0.939993	0.939157
Rest Centrally Planned Asia	SSP3	2060	0.962136	0.963994	0.963065
Rest Centrally Planned Asia	SSP3	2065	0.983981	0.986009	0.984995
Rest Centrally Planned Asia	SSP3	2070	1.00335	1.00553	1.00444
Rest Centrally Planned Asia	SSP3	2075	1.01919	1.02149	1.02034
Rest Centrally Planned Asia	SSP3	2080	1.0317	1.03409	1.03289
Rest Centrally Planned Asia	SSP3	2085	1.04178	1.04424	1.04301
Rest Centrally Planned Asia	SSP3	2090	1.0503	1.05282	1.05156
Rest Centrally Planned Asia	SSP3	2095	1.05794	1.06051	1.05923
Rest Centrally Planned Asia	SSP3	2100	1.06509	1.0677	1.06639
Rest Centrally Planned Asia	SSP4	2020	0.6667	0.6667	0.6667
Rest Centrally Planned Asia	SSP4	2025	0.702972	0.703049	0.703011
Rest Centrally Planned Asia	SSP4	2030	0.759929	0.760285	0.760107
Rest Centrally Planned Asia	SSP4	2035	0.816615	0.817353	0.816984
Rest Centrally Planned Asia	SSP4	2040	0.86474	0.865842	0.865291
Rest Centrally Planned Asia	SSP4	2045	0.907731	0.909171	0.908451
Rest Centrally Planned Asia	SSP4	2050	0.9493	0.95107	0.950185
Rest Centrally Planned Asia	SSP4	2055	0.991654	0.993757	0.992706
Rest Centrally Planned Asia	SSP4	2060	1.03433	1.03676	1.03555
Rest Centrally Planned Asia	SSP4	2065	1.07788	1.08062	1.07925
Rest Centrally Planned Asia	SSP4	2070	1.12215	1.1252	1.12367
Rest Centrally Planned Asia	SSP4	2075	1.16595	1.16928	1.16761
Rest Centrally Planned Asia	SSP4	2080	1.20927	1.21285	1.21106
Rest Centrally Planned Asia	SSP4	2085	1.25288	1.25668	1.25478
Rest Centrally Planned Asia	SSP4	2090	1.29773	1.30174	1.29973
Rest Centrally Planned Asia	SSP4	2095	1.34492	1.3491	1.34701
Rest Centrally Planned Asia	SSP4	2100	1.3954	1.39974	1.39757
Rest Centrally Planned Asia	SSP5	2020	0.6667	0.6667	0.6667
Rest Centrally Planned Asia	SSP5	2025	0.703502	0.703583	0.703543
Rest Centrally Planned Asia	SSP5	2030	0.764483	0.764878	0.76468
Rest Centrally Planned Asia	SSP5	2035	0.846231	0.847222	0.846726
Rest Centrally Planned Asia	SSP5	2040	0.93555	0.937262	0.936406
Rest Centrally Planned Asia	SSP5	2045	1.02262	1.02502	1.02382
Rest Centrally Planned Asia	SSP5	2050	1.10225	1.10522	1.10373
Rest Centrally Planned Asia	SSP5	2055	1.1811	1.18457	1.18284
Rest Centrally Planned Asia	SSP5	2060	1.26394	1.26784	1.26589
Rest Centrally Planned Asia	SSP5	2065	1.35336	1.35761	1.35549
Rest Centrally Planned Asia	SSP5	2070	1.44971	1.4542	1.45195
Rest Centrally Planned Asia	SSP5	2075	1.5496	1.55417	1.55189
Rest Centrally Planned Asia	SSP5	2080	1.65205	1.65654	1.6543
Rest Centrally Planned Asia	SSP5	2085	1.75818	1.76239	1.76029
Rest Centrally Planned Asia	SSP5	2090	1.8699	1.87362	1.87176
Rest Centrally Planned Asia	SSP5	2095	1.9889	1.99185	1.99038
Rest Centrally Planned Asia	SSP5	2100	2.11615	2.11804	2.11709
South Asia	Historical	2003	0.37309	0.37309	0.37309
South Asia	Historical	2004	0.38789	0.38789	0.38789
South Asia	Historical	2005	0.40013	0.40013	0.40013
South Asia	Historical	2008	0.3814	0.3814	0.3814
South Asia	Historical	2010	0.35673	0.35673	0.35673
South Asia	Historical	2012	0.38287	0.38287	0.38287
South Asia	Historical	2014	0.38343	0.38343	0.38343
South Asia	Historical	2016	0.46375	0.46375	0.46375
South Asia	Historical	2018	0.5669	0.5669	0.5669
South Asia	Historical	2020	0.5964	0.5964	0.5964
South Asia	SSP1	2020	0.5964	0.5964	0.5964
South Asia	SSP1	2025	0.662467	0.662615	0.662541
South Asia	SSP1	2030	0.728161	0.728337	0.728249
South Asia	SSP1	2035	0.788034	0.788128	0.788081
South Asia	SSP1	2040	0.843521	0.843622	0.843571
South Asia	SSP1	2045	0.896017	0.896415	0.896216
South Asia	SSP1	2050	0.943086	0.943851	0.943468
South Asia	SSP1	2055	0.986292	0.987474	0.986883
South Asia	SSP1	2060	1.02687	1.02851	1.02769
South Asia	SSP1	2065	1.06556	1.06767	1.06662
South Asia	SSP1	2070	1.10125	1.10383	1.10254
South Asia	SSP1	2075	1.13388	1.1369	1.13539
South Asia	SSP1	2080	1.16236	1.16578	1.16407
South Asia	SSP1	2085	1.18713	1.19088	1.189
South Asia	SSP1	2090	1.20928	1.2133	1.21129
South Asia	SSP1	2095	1.22961	1.23383	1.23172
South Asia	SSP1	2100	1.24895	1.2533	1.25113
South Asia	SSP2	2020	0.5964	0.5964	0.5964
South Asia	SSP2	2025	0.666438	0.666585	0.666511
South Asia	SSP2	2030	0.739236	0.739413	0.739324
South Asia	SSP2	2035	0.804968	0.805086	0.805027
South Asia	SSP2	2040	0.864147	0.864158	0.864152
South Asia	SSP2	2045	0.916513	0.916717	0.916615
South Asia	SSP2	2050	0.963034	0.96349	0.963262
South Asia	SSP2	2055	1.0068	1.00756	1.00718
South Asia	SSP2	2060	1.04847	1.04958	1.04902
South Asia	SSP2	2065	1.08746	1.08896	1.08821
South Asia	SSP2	2070	1.12341	1.12531	1.12436
South Asia	SSP2	2075	1.15664	1.15895	1.1578
South Asia	SSP2	2080	1.18724	1.18995	1.1886
South Asia	SSP2	2085	1.21639	1.21947	1.21793
South Asia	SSP2	2090	1.24524	1.24866	1.24695
South Asia	SSP2	2095	1.27452	1.27824	1.27638
South Asia	SSP2	2100	1.30514	1.30911	1.30713
South Asia	SSP3	2020	0.5964	0.5964	0.5964
South Asia	SSP3	2025	0.669966	0.670112	0.670039
South Asia	SSP3	2030	0.749073	0.74925	0.749161
South Asia	SSP3	2035	0.820801	0.82094	0.820871
South Asia	SSP3	2040	0.884166	0.884235	0.8842
South Asia	SSP3	2045	0.935841	0.935854	0.935847
South Asia	SSP3	2050	0.978815	0.978922	0.978868
South Asia	SSP3	2055	1.01796	1.01817	1.01807
South Asia	SSP3	2060	1.05387	1.05419	1.05403
South Asia	SSP3	2065	1.08468	1.0851	1.08489
South Asia	SSP3	2070	1.11018	1.11069	1.11044
South Asia	SSP3	2075	1.13066	1.13126	1.13096
South Asia	SSP3	2080	1.14761	1.1483	1.14796
South Asia	SSP3	2085	1.16352	1.16429	1.1639
South Asia	SSP3	2090	1.18028	1.18111	1.1807
South Asia	SSP3	2095	1.19845	1.19934	1.1989
South Asia	SSP3	2100	1.21837	1.21933	1.21885
South Asia	SSP4	2020	0.5964	0.5964	0.5964
South Asia	SSP4	2025	0.670383	0.670529	0.670456
South Asia	SSP4	2030	0.750518	0.750696	0.750607
South Asia	SSP4	2035	0.82465	0.824785	0.824718
South Asia	SSP4	2040	0.891972	0.892018	0.891995
South Asia	SSP4	2045	0.94906	0.949132	0.949096
South Asia	SSP4	2050	0.999342	0.999566	0.999454
South Asia	SSP4	2055	1.04793	1.04833	1.04813
South Asia	SSP4	2060	1.09509	1.0957	1.0954
South Asia	SSP4	2065	1.1388	1.13963	1.13921
South Asia	SSP4	2070	1.17879	1.17984	1.17932
South Asia	SSP4	2075	1.21556	1.21686	1.21621
South Asia	SSP4	2080	1.25058	1.25215	1.25137
South Asia	SSP4	2085	1.28622	1.28805	1.28713
South Asia	SSP4	2090	1.3241	1.32618	1.32514
South Asia	SSP4	2095	1.36467	1.36701	1.36584
South Asia	SSP4	2100	1.40844	1.41104	1.40974
South Asia	SSP5	2020	0.5964	0.5964	0.5964
South Asia	SSP5	2025	0.662094	0.662242	0.662168
South Asia	SSP5	2030	0.727867	0.728042	0.727954
South Asia	SSP5	2035	0.792125	0.792197	0.792161
South Asia	SSP5	2040	0.857801	0.858002	0.857902
South Asia	SSP5	2045	0.925227	0.925863	0.925545
South Asia	SSP5	2050	0.989535	0.990699	0.990117
South Asia	SSP5	2055	1.05331	1.05506	1.05418
South Asia	SSP5	2060	1.11938	1.12177	1.12057
South Asia	SSP5	2065	1.18973	1.19275	1.19124
South Asia	SSP5	2070	1.2635	1.26709	1.2653
South Asia	SSP5	2075	1.34122	1.34527	1.34324
South Asia	SSP5	2080	1.42186	1.42619	1.42403
South Asia	SSP5	2085	1.50618	1.51057	1.50838
South Asia	SSP5	2090	1.59577	1.59994	1.59785
South Asia	SSP5	2095	1.6919	1.6955	1.6937
South Asia	SSP5	2100	1.79585	1.79848	1.79716
Sub-Saharan Africa	Historical	2003	0.438127	0.438127	0.438127
Sub-Saharan Africa	Historical	2004	0.416775	0.416775	0.416775
Sub-Saharan Africa	Historical	2005	0.440061	0.440061	0.440061
Sub-Saharan Africa	Historical	2008	0.452337	0.452337	0.452337
Sub-Saharan Africa	Historical	2010	0.388734	0.388734	0.388734
Sub-Saharan Africa	Historical	2012	0.432097	0.432097	0.432097
Sub-Saharan Africa	Historical	2014	0.41747	0.41747	0.41747
Sub-Saharan Africa	Historical	2016	0.457191	0.457191	0.457191
Sub-Saharan Africa	Historical	2018	0.539791	0.539791	0.539791
Sub-Saharan Africa	Historical	2020	0.565986	0.565986	0.565986
Sub-Saharan Africa	SSP1	2020	0.565986	0.565986	0.565986
Sub-Saharan Africa	SSP1	2025	0.572241	0.572243	0.572242
Sub-Saharan Africa	SSP1	2030	0.578078	0.578094	0.578086
Sub-Saharan Africa	SSP1	2035	0.592474	0.592491	0.592483
Sub-Saharan Africa	SSP1	2040	0.614006	0.614026	0.614016
Sub-Saharan Africa	SSP1	2045	0.64181	0.641918	0.641864
Sub-Saharan Africa	SSP1	2050	0.674584	0.674831	0.674707
Sub-Saharan Africa	SSP1	2055	0.712087	0.712525	0.712306
Sub-Saharan Africa	SSP1	2060	0.755075	0.755752	0.755414
Sub-Saharan Africa	SSP1	2065	0.803824	0.804785	0.804304
Sub-Saharan Africa	SSP1	2070	0.857949	0.859222	0.858585
Sub-Saharan Africa	SSP1	2075	0.917233	0.918828	0.918031
Sub-Saharan Africa	SSP1	2080	0.981677	0.983592	0.982635
Sub-Saharan Africa	SSP1	2085	1.05152	1.05373	1.05262
Sub-Saharan Africa	SSP1	2090	1.12704	1.1295	1.12827
Sub-Saharan Africa	SSP1	2095	1.20841	1.21105	1.20973
Sub-Saharan Africa	SSP1	2100	1.29586	1.2986	1.29723
Sub-Saharan Africa	SSP2	2020	0.565986	0.565986	0.565986
Sub-Saharan Africa	SSP2	2025	0.571807	0.571817	0.571812
Sub-Saharan Africa	SSP2	2030	0.576853	0.576858	0.576856
Sub-Saharan Africa	SSP2	2035	0.58929	0.589306	0.589298
Sub-Saharan Africa	SSP2	2040	0.606879	0.606935	0.606907
Sub-Saharan Africa	SSP2	2045	0.62857	0.628698	0.628634
Sub-Saharan Africa	SSP2	2050	0.653647	0.653877	0.653762
Sub-Saharan Africa	SSP2	2055	0.682228	0.682587	0.682408
Sub-Saharan Africa	SSP2	2060	0.714536	0.715052	0.714794
Sub-Saharan Africa	SSP2	2065	0.750767	0.751464	0.751115
Sub-Saharan Africa	SSP2	2070	0.791034	0.791932	0.791483
Sub-Saharan Africa	SSP2	2075	0.835618	0.836735	0.836176
Sub-Saharan Africa	SSP2	2080	0.884899	0.886248	0.885574
Sub-Saharan Africa	SSP2	2085	0.939174	0.940758	0.939966
Sub-Saharan Africa	SSP2	2090	0.998886	1.0007	0.999791
Sub-Saharan Africa	SSP2	2095	1.06427	1.06629	1.06528
Sub-Saharan Africa	SSP2	2100	1.13585	1.13803	1.13694
Sub-Saharan Africa	SSP3	2020	0.565986	0.565986	0.565986
Sub-Saharan Africa	SSP3	2025	0.571635	0.57165	0.571642
Sub-Saharan Africa	SSP3	2030	0.575892	0.575911	0.575901
Sub-Saharan Africa	SSP3	2035	0.585367	0.585402	0.585384
Sub-Saharan Africa	SSP3	2040	0.597696	0.597772	0.597734
Sub-Saharan Africa	SSP3	2045	0.611437	0.611574	0.611505
Sub-Saharan Africa	SSP3	2050	0.625585	0.625793	0.625689
Sub-Saharan Africa	SSP3	2055	0.639977	0.640258	0.640117
Sub-Saharan Africa	SSP3	2060	0.654166	0.65452	0.654343
Sub-Saharan Africa	SSP3	2065	0.668088	0.668507	0.668298
Sub-Saharan Africa	SSP3	2070	0.681807	0.682285	0.682046
Sub-Saharan Africa	SSP3	2075	0.695439	0.69597	0.695705
Sub-Saharan Africa	SSP3	2080	0.709007	0.709589	0.709298
Sub-Saharan Africa	SSP3	2085	0.722434	0.723063	0.722748
Sub-Saharan Africa	SSP3	2090	0.735779	0.73645	0.736114
Sub-Saharan Africa	SSP3	2095	0.749064	0.749774	0.749419
Sub-Saharan Africa	SSP3	2100	0.762452	0.763196	0.762824
Sub-Saharan Africa	SSP4	2020	0.565986	0.565986	0.565986
Sub-Saharan Africa	SSP4	2025	0.571597	0.571612	0.571605
Sub-Saharan Africa	SSP4	2030	0.575911	0.575931	0.575921
Sub-Saharan Africa	SSP4	2035	0.586634	0.586676	0.586655
Sub-Saharan Africa	SSP4	2040	0.602041	0.60214	0.602091
Sub-Saharan Africa	SSP4	2045	0.621078	0.621274	0.621176
Sub-Saharan Africa	SSP4	2050	0.6426	0.642923	0.642761
Sub-Saharan Africa	SSP4	2055	0.666424	0.666896	0.66666
Sub-Saharan Africa	SSP4	2060	0.692097	0.692729	0.692413
Sub-Saharan Africa	SSP4	2065	0.719598	0.720392	0.719995
Sub-Saharan Africa	SSP4	2070	0.74898	0.749931	0.749455
Sub-Saharan Africa	SSP4	2075	0.78031	0.781405	0.780858
Sub-Saharan Africa	SSP4	2080	0.813573	0.814795	0.814184
Sub-Saharan Africa	SSP4	2085	0.848563	0.849884	0.849224
Sub-Saharan Africa	SSP4	2090	0.885338	0.88672	0.886029
Sub-Saharan Africa	SSP4	2095	0.923873	0.925271	0.924572
Sub-Saharan Africa	SSP4	2100	0.964424	0.965783	0.965103
Sub-Saharan Africa	SSP5	2020	0.565986	0.565986	0.565986
Sub-Saharan Africa	SSP5	2025	0.572245	0.572247	0.572246
Sub-Saharan Africa	SSP5	2030	0.57822	0.578236	0.578228
Sub-Saharan Africa	SSP5	2035	0.594502	0.594517	0.59451
Sub-Saharan Africa	SSP5	2040	0.621336	0.621373	0.621355
Sub-Saharan Africa	SSP5	2045	0.658358	0.65853	0.658444
Sub-Saharan Africa	SSP5	2050	0.703397	0.703789	0.703593
Sub-Saharan Africa	SSP5	2055	0.756708	0.757401	0.757055
Sub-Saharan Africa	SSP5	2060	0.820058	0.821124	0.820591
Sub-Saharan Africa	SSP5	2065	0.894719	0.896207	0.895463
Sub-Saharan Africa	SSP5	2070	0.981144	0.983059	0.982102
Sub-Saharan Africa	SSP5	2075	1.08002	1.08231	1.08116
Sub-Saharan Africa	SSP5	2080	1.19237	1.19492	1.19365
Sub-Saharan Africa	SSP5	2085	1.31961	1.32223	1.32092
Sub-Saharan Africa	SSP5	2090	1.4634	1.46579	1.46459
Sub-Saharan Africa	SSP5	2095	1.62536	1.62707	1.62622
Sub-Saharan Africa	SSP5	2100	1.80737	1.80783	1.8076
Western Europe	Historical	2003	0.685729	0.685729	0.685729
Western Europe	Historical	2004	0.69661	0.69661	0.69661
Western Europe	Historical	2005	0.706888	0.706888	0.706888
Western Europe	Historical	2008	0.704591	0.704591	0.704591
Western Europe	Historical	2010	0.683909	0.683909	0.683909
Western Europe	Historical	2012	0.7687	0.7687	0.7687
Western Europe	Historical	2014	0.776337	0.776337	0.776337
Western Europe	Historical	2016	0.790469	0.790469	0.790469
Western Europe	Historical	2018	0.836599	0.836599	0.836599
Western Europe	Historical	2020	0.857076	0.857076	0.857076
Western Europe	SSP1	2020	0.857076	0.857076	0.857076
Western Europe	SSP1	2025	0.92574	0.9262	0.92597
Western Europe	SSP1	2030	0.97417	0.974924	0.974547
Western Europe	SSP1	2035	1.02967	1.03073	1.0302
Western Europe	SSP1	2040	1.09304	1.0944	1.09372
Western Europe	SSP1	2045	1.16053	1.16213	1.16133
Western Europe	SSP1	2050	1.22589	1.22765	1.22677
Western Europe	SSP1	2055	1.29087	1.29272	1.29179
Western Europe	SSP1	2060	1.35751	1.35939	1.35845
Western Europe	SSP1	2065	1.42533	1.42715	1.42624
Western Europe	SSP1	2070	1.49058	1.49227	1.49142
Western Europe	SSP1	2075	1.55208	1.5536	1.55284
Western Europe	SSP1	2080	1.60977	1.61106	1.61042
Western Europe	SSP1	2085	1.66484	1.66587	1.66535
Western Europe	SSP1	2090	1.71832	1.71905	1.71869
Western Europe	SSP1	2095	1.7703	1.77069	1.7705
Western Europe	SSP1	2100	1.81986	1.81988	1.81987
Western Europe	SSP2	2020	0.857076	0.857076	0.857076
Western Europe	SSP2	2025	0.925944	0.926404	0.926174
Western Europe	SSP2	2030	0.973959	0.974711	0.974335
Western Europe	SSP2	2035	1.02265	1.02367	1.02316
Western Europe	SSP2	2040	1.07292	1.07418	1.07355
Western Europe	SSP2	2045	1.12442	1.12589	1.12515
Western Europe	SSP2	2050	1.17574	1.17737	1.17655
Western Europe	SSP2	2055	1.22857	1.23031	1.22944
Western Europe	SSP2	2060	1.28327	1.28509	1.28418
Western Europe	SSP2	2065	1.33894	1.34078	1.33986
Western Europe	SSP2	2070	1.39221	1.39404	1.39313
Western Europe	SSP2	2075	1.44242	1.44419	1.44331
Western Europe	SSP2	2080	1.48978	1.49146	1.49062
Western Europe	SSP2	2085	1.53533	1.53688	1.5361
Western Europe	SSP2	2090	1.57989	1.5813	1.58059
Western Europe	SSP2	2095	1.6235	1.62473	1.62411
Western Europe	SSP2	2100	1.6655	1.66653	1.66601
Western Europe	SSP3	2020	0.857076	0.857076	0.857076
Western Europe	SSP3	2025	0.927141	0.927609	0.927375
Western Europe	SSP3	2030	0.975142	0.975899	0.97552
Western Europe	SSP3	2035	1.01375	1.01472	1.01424
Western Europe	SSP3	2040	1.04445	1.04558	1.04501
Western Europe	SSP3	2045	1.06988	1.07112	1.0705
Western Europe	SSP3	2050	1.09168	1.09302	1.09235
Western Europe	SSP3	2055	1.11232	1.11373	1.11302
Western Europe	SSP3	2060	1.13095	1.13242	1.13168
Western Europe	SSP3	2065	1.14658	1.1481	1.14734
Western Europe	SSP3	2070	1.15711	1.15865	1.15788
Western Europe	SSP3	2075	1.16346	1.16501	1.16423
Western Europe	SSP3	2080	1.16691	1.16846	1.16768
Western Europe	SSP3	2085	1.16885	1.17038	1.16962
Western Europe	SSP3	2090	1.1699	1.17141	1.17065
Western Europe	SSP3	2095	1.16995	1.17144	1.1707
Western Europe	SSP3	2100	1.16868	1.17013	1.1694
Western Europe	SSP4	2020	0.857076	0.857076	0.857076
Western Europe	SSP4	2025	0.92701	0.927478	0.927244
Western Europe	SSP4	2030	0.977986	0.978763	0.978375
Western Europe	SSP4	2035	1.03468	1.03577	1.03523
Western Europe	SSP4	2040	1.09683	1.09821	1.09752
Western Europe	SSP4	2045	1.16045	1.16206	1.16126
Western Europe	SSP4	2050	1.22003	1.22179	1.22091
Western Europe	SSP4	2055	1.27722	1.27907	1.27815
Western Europe	SSP4	2060	1.33422	1.33611	1.33516
Western Europe	SSP4	2065	1.39067	1.39253	1.3916
Western Europe	SSP4	2070	1.4433	1.44509	1.44419
Western Europe	SSP4	2075	1.49122	1.49291	1.49207
Western Europe	SSP4	2080	1.5345	1.53607	1.53529
Western Europe	SSP4	2085	1.57407	1.57549	1.57478
Western Europe	SSP4	2090	1.61089	1.61216	1.61152
Western Europe	SSP4	2095	1.64538	1.64648	1.64593
Western Europe	SSP4	2100	1.67735	1.67828	1.67782
Western Europe	SSP5	2020	0.857076	0.857076	0.857076
Western Europe	SSP5	2025	0.922422	0.922861	0.922641
Western Europe	SSP5	2030	0.967802	0.96852	0.968161
Western Europe	SSP5	2035	1.03053	1.0316	1.03106
Western Europe	SSP5	2040	1.11381	1.11525	1.11453
Western Europe	SSP5	2045	1.21044	1.21218	1.21131
Western Europe	SSP5	2050	1.30873	1.31062	1.30968
Western Europe	SSP5	2055	1.41185	1.41372	1.41278
Western Europe	SSP5	2060	1.52356	1.52521	1.52438
Western Europe	SSP5	2065	1.64433	1.64551	1.64492
Western Europe	SSP5	2070	1.76987	1.7703	1.77009
Western Europe	SSP5	2075	1.89795	1.89855	1.89825
Western Europe	SSP5	2080	2.02818	2.03009	2.02914
Western Europe	SSP5	2085	2.16237	2.16593	2.16415
Western Europe	SSP5	2090	2.30192	2.3075	2.30471
Western Europe	SSP5	2095	2.44708	2.45511	2.45109
Western Europe	SSP5	2100	2.59665	2.60755	2.6021
